# Supplementary material for: Remote arylalkylation of unactivated alkenesvia6- or 7-membered nickelacycles with excellent diastereofidelity
Source: Royal Society of Chemistry journal article supplement (doi:10.1039/d2qo01182d), 2022-01-01
Supplement: d2qo01182d1.pdf [file d2qo01182d1.pdf]

## Supporting Information

### Remote Arylalkylation of Unactivated Alkenes via 6- or 7- Membered Nickelacycles with Excellent Diastereofidelity

Junsong Zhao,<sup>†</sup> Linyan Bao,<sup>†</sup> Lin Zhu, Lei Zhao, Luyao Ding, Lanlan, Zhang, Wei Guan,\* and Chao Wang\*

---

[\*] J. Zhao, L. Zhu, L. Zhao, L. Ding, L. Zhang, Prof. C. Wang

Tianjin Key Laboratory of Structure and Performance for Functional Molecules; College of Chemistry, Tianjin Normal University, Tianjin 300387, People's Republic of China

E-mail: chwang@tjnu.edu.cn

L. Bao, Prof. W. Guan

Institute of Functional Material Chemistry, Department of Chemistry, Northeast Normal University, Changchun 130024, China

E-mail: guanw580@nenu.edu.cn

[<sup>†</sup>] These authors contributed equally to this work.

## Table of Contents

|                                                                           |     |
|---------------------------------------------------------------------------|-----|
| 1. General Remarks.....                                                   | 3   |
| 2. Optimization of Reaction Conditions .....                              | 4   |
| 3. Alkenes Substrate Synthesis .....                                      | 5   |
| 4. General Procedure for the Ni-Catalyzed Arylalkylation of Alkenes ..... | 5   |
| 5. Product Derivatization .....                                           | 5   |
| 6. Derivatization of 2a.....                                              | 29  |
| 7. EPR Experiment.....                                                    | 35  |
| 8. X-ray Crystallographic Data .....                                      | 36  |
| 9. Kinetic Studies .....                                                  | 40  |
| 10. DFT Calculations .....                                                | 49  |
| 11. References.....                                                       | 53  |
| 12. Cartesian Coordinates of Optimized Structures.....                    | 54  |
| 13. NMR Spectra .....                                                     | 132 |

## 1. General Remarks

All the manipulations were performed in an argon-filled glovebox, unless mentioned otherwise. Anhydrous solvent was purchased from commercial sources and transferred under argon atmosphere. Alkene substrates and Amine benzoate substrates were prepared according to previously reported procedures, all arylboronic acids were purchased from commercial sources and used without further purification. All reagents were purchased from Energy Chemicals and used as received.

$^1\text{H}$  NMR,  $^{13}\text{C}$  NMR spectra were recorded using Bruker 400 MHz NMR spectrometer.  $^1\text{H}$  NMR and  $^{13}\text{C}$  NMR spectra were referenced to resonances of the residual protons in the deuterated solvents. Multiplicities are recorded as: s = singlet, d = doublet, t = triplet, dd = doublet of doublets, and m = multiplet. GC-MS analysis was performed on Shimadzu GC-2010 gas chromatography coupled to a Shimadzu QP2010 mass selective detector. Analytical HPLC/MS was performed with an Agilent 6520 Series HPLC. X-Band EPR spectra were recorded on a Bruker ELEXSYS E580-10/12 EPR spectrometer.

## 2. Optimization of Reaction Conditions

**Table S1.** Screening of nickel catalysts

| entry | Cat. (15 mol%)                   | yield <b>2a</b> (%) |
|-------|----------------------------------|---------------------|
| 1     | NiBr <sub>2</sub> ·DME           | 90                  |
| 2     | Ni(COD) <sub>2</sub>             | 69                  |
| 3     | NiCl <sub>2</sub>                | 29                  |
| 4     | NiBr <sub>2</sub>                | 30                  |
| 5     | NiI <sub>2</sub>                 | 85                  |
| 6     | NiBr <sub>2</sub> ·DME (10 mol%) | 79                  |

**Table S2.** Screening of the amount of methanol

| entry | deviation from standard conditions | yield <b>2a</b> (%) |
|-------|------------------------------------|---------------------|
| 1     | MeOH omitted                       | 3                   |
| 2     | 0.5 eq MeOH                        | 60                  |
| 3     | 1 eq MeOH                          | 64                  |
| 4     | 2 eq MeOH                          | 69                  |
| 5     | 15 eq MeOH                         | 90                  |

**Table S3.** Screening of ligands

| entry | deviation from standard conditions | yield <b>2a</b> (%) |
|-------|------------------------------------|---------------------|
| 1     | xantphos                           | <2                  |
| 2     | dppf                               | <2                  |
| 3     |                                    | 76                  |
| 4     |                                    | 83                  |
| 5     |                                    | 86                  |

### 3. Alkenes Substrate Synthesis

Table S4. Substrate synthesis of olefins containing guiding groups

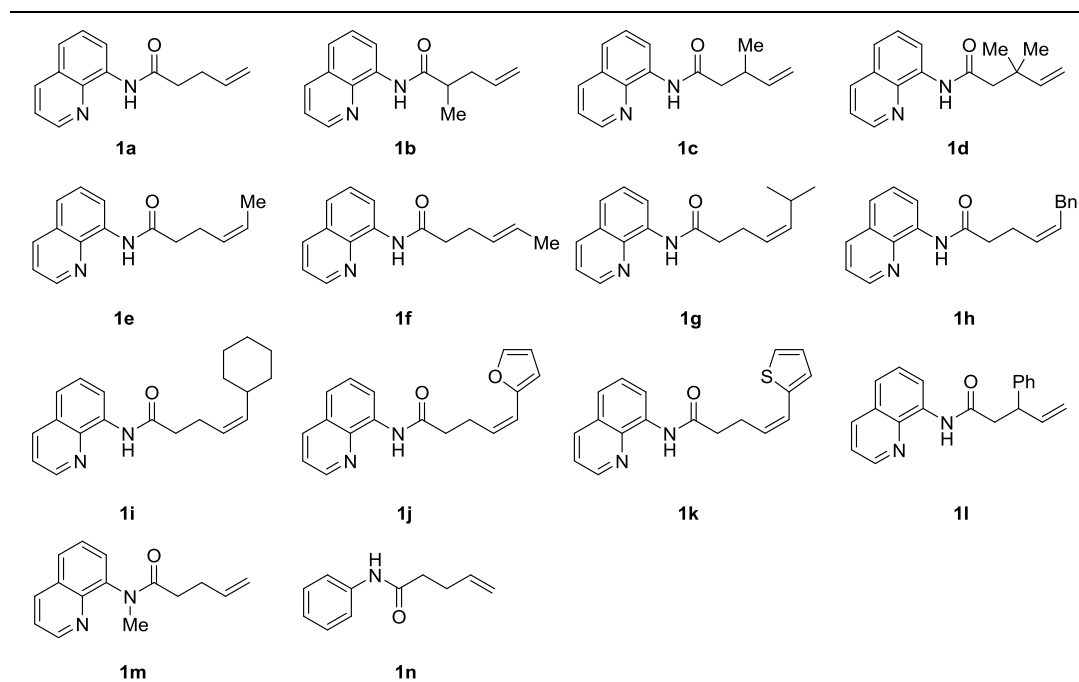

Alkene substrates **1a–1n** were prepared according to literature methods.<sup>[1, 2, 3]</sup>

### 4. General Procedure for the Ni-Catalyzed Arylalkylation of Alkenes

In an argon-filled glovebox, NiBr<sub>2</sub>•DME (0.03 mmol, 15 mol%), alkene substrate (0.2 mmol, 1.0 eq), appropriate aryl boric acid nucleophile (0.40 mmol, 2 eq), K<sub>3</sub>PO<sub>4</sub> (0.5 mmol, 2.5 eq), appropriate alkyl iodide electrophile (0.4 mmol, 2 eq), MeOH (3 mmol, 15 eq), DMF (1 mL) were added to a 12 mL tube. The reaction mixture was stirred at 80 °C for 12 h. The crude product was purified by column chromatography on silica gel with a mixture of ethyl acetate and hexane as eluent. The conditions for flash chromatography and data for characterization of the products are listed below.

### 5. Product Derivatization

#### *4-benzyl-N-(quinolin-8-yl)octanamide (2a)*

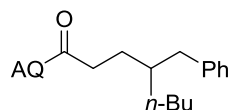

The title compound was isolated as a yellow oil (90% yield) after chromatography on silica with ethyl acetate:hexane (1:20).  $^1\text{H}$  NMR (400 MHz,  $\text{CDCl}_3$ )  $\delta$  8.55 (m, 1H), 8.21 (m, 1H), 8.14 (m,

1H), 7.85 (m, 1H), 7.43 (m, 1H), 6.03–5.87 (m, 1H), 5.31–5.15 (m, 2H), 4.13–4.04 (m, 2H);  $^{13}\text{C}$  NMR (101 MHz,  $\text{CDCl}_3$ )  $\delta$  171.9, 148.0, 141.1, 138.3, 136.4, 134.5, 129.2, 128.2, 127.9, 127.4, 125.7, 121.5, 121.3, 116.4, 40.4, 39.3, 35.6, 32.7, 29.1, 28.7, 23.0, 14.1. HRMS (ESI)  $m/z$  calculated for  $\text{C}_{24}\text{H}_{39}\text{N}_2\text{O}^+$   $[\text{M}+\text{H}]^+$  371.2274, found 371.2276.

#### **4-(4-methylbenzyl)-N-(quinolin-8-yl)octanamide (2b)**

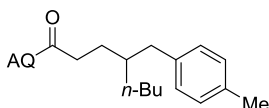

The title compound was isolated as a black oil (78% yield) after chromatography on silica with ethyl acetate:hexane (1:20).  $^1\text{H}$  NMR (400 MHz,  $\text{CDCl}_3$ )  $\delta$  8.55 (dd,  $J = 4.8, 0.7$

Hz, 1H), 8.44 (m, 1H), 8.18 (d,  $J = 7.8$  Hz, 1H), 7.83 (m, 1H), 7.46–7.29 (m, 5H), 7.25 (m, 1H), 5.77 (m, 1H), 5.27 (dd,  $J = 15.4, 7.0$  Hz, 1H), 5.22–5.04 (m, 2H), 2.77–2.65 (m, 2H);  $^{13}\text{C}$  NMR (101 MHz,  $\text{CDCl}_3$ )  $\delta$  171.9, 148.0, 138.3, 137.9, 136.3, 135.1, 134.6, 129.1, 128.9, 127.9, 127.4, 121.5, 121.3, 116.4, 39.9, 39.3, 35.6, 32.7, 29.1, 28.7, 23.0, 21.0, 14.1. HRMS (ESI)  $m/z$  calculated for  $\text{C}_{25}\text{H}_{31}\text{N}_2\text{O}^+$   $[\text{M}+\text{H}]^+$  375.2431, found 375.2436.

#### **4-(3-methylbenzyl)-N-(quinolin-8-yl)octanamide (2c)**

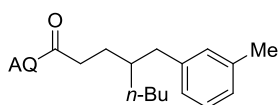

The title compound was isolated as a black oil (60% yield) after chromatography on silica with ethyl acetate:hexane (1:20).  $^1\text{H}$  NMR (400 MHz,  $\text{CDCl}_3$ )  $\delta$  8.57–8.51 (m, 1H),

8.19 (d,  $J = 7.8$  Hz, 1H), 8.08 (m, 1H), 7.84 (m, 1H), 7.41 (m, 1H), 4.88–4.77 (m, 2H), 3.61 (dd,  $J = 12.9, 6.9$  Hz, 2H), 2.35 (t,  $J = 6.9$  Hz, 2H), 1.79 (s, 3H);  $^{13}\text{C}$  NMR (101 MHz,  $\text{CDCl}_3$ )  $\delta$  172.0, 147.8, 141.0, 138.0, 137.7, 136.7, 134.4, 129.9, 128.1, 128.0, 127.6, 126.5, 126.2, 121.5, 121.3, 116.8, 40.3, 39.3, 35.6, 32.7, 29.1, 28.6, 23.0, 21.3, 14.1. HRMS (ESI)  $m/z$  calculated for  $\text{C}_{25}\text{H}_{31}\text{N}_2\text{O}^+$   $[\text{M}+\text{H}]^+$  375.2431, found 375.2432.

#### 4-(2-methylbenzyl)-N-(quinolin-8-yl)octanamide (2d)

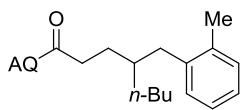

The title compound was isolated as a black oil (60% yield) after chromatography on silica with ethyl acetate:hexane (1:20).  $^1\text{H}$  NMR (400 MHz,  $\text{CDCl}_3$ )  $\delta$  9.76 (s, 1H), 8.81–8.75 (m, 2H), 8.15 (dd,  $J = 8.2, 1.1$  Hz, 1H), 7.54–7.47 (m, 2H), 7.44 (dd,  $J = 8.3, 4.2$  Hz, 1H), 7.15–7.06 (m, 4H), 2.67–2.49 (m, 4H), 2.31 (s, 3H), 1.92–1.74 (m, 3H), 1.36 (d,  $J = 4.5$  Hz, 4H), 1.32–1.24 (m, 3H), 0.88 (t,  $J = 6.9$  Hz, 3H);  $^{13}\text{C}$  NMR (101 MHz,  $\text{CDCl}_3$ )  $\delta$  171.9, 148.0, 139.3, 138.3, 136.3, 136.2, 134.5, 130.3, 130.0, 127.9, 127.4, 125.9, 125.7, 121.5, 121.3, 116.4, 38.1, 38.0, 35.7, 33.0, 29.3, 28.7, 23.0, 19.6, 14.1. HRMS (ESI)  $m/z$  calculated for  $\text{C}_{25}\text{H}_{31}\text{N}_2\text{O}^+$   $[\text{M}+\text{H}]^+$  375.2431, found 375.2438.

#### 4-(4-methoxybenzyl)-N-(quinolin-8-yl)octanamide (2e)

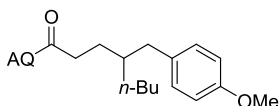

The title compound was isolated as a fulvous oil (62% yield) after chromatography on silica with ethyl acetate:hexane (1:15).  $^1\text{H}$  NMR (400 MHz,  $\text{CDCl}_3$ )  $\delta$  9.76 (s, 1H), 8.81–8.77 (m, 2H), 8.15 (dd,  $J = 8.3, 1.4$  Hz, 1H), 7.51–7.43 (m, 3H), 7.09 (d,  $J = 8.5$  Hz, 2H), 6.81 (d,  $J = 8.6$  Hz, 2H), 3.76 (s, 3H), 2.56 (dd,  $J = 13.5, 6.4$  Hz, 4H), 1.83–1.72 (m, 3H), 1.35–1.24 (m, 6H), 0.88 (t,  $J = 7.0$  Hz, 3H);  $^{13}\text{C}$  NMR (101 MHz,  $\text{CDCl}_3$ )  $\delta$  171.9, 157.7, 148.1, 138.3, 136.3, 134.5, 133.1, 130.0, 127.9, 127.4, 121.5, 121.3, 116.4, 113.7, 55.2, 39.4, 35.6, 32.7, 29.7, 29.1, 28.7, 23.0, 14.1. HRMS (ESI)  $m/z$  calculated for  $\text{C}_{25}\text{H}_{31}\text{N}_2\text{O}_2^+$   $[\text{M}+\text{H}]^+$  391.2380, found 390.2384.

#### 4-(benzo[d][1,3]dioxol-5-ylmethyl)-N-(quinolin-8-yl)octanamide (2f)

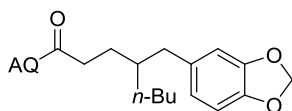

The title compound was isolated as a brown oil (80% yield) after chromatography on silica with ethyl acetate:hexane (1:20).  $^1\text{H}$  NMR (400 MHz,  $\text{CDCl}_3$ )  $\delta$  9.77 (s, 1H), 8.81–8.75 (m, 3H), 8.17–8.14 (m, 1H), 7.55–7.44 (m, 4H), 6.69 (dd,  $J = 12.7, 4.6$  Hz, 2H), 6.63 (dd,  $J = 7.9, 1.4$  Hz, 1H), 5.89 (dd,  $J = 4.1, 1.3$  Hz, 2H), 2.61–2.47 (m, 5H), 1.80

(dd,  $J = 14.9, 7.2$  Hz, 2H), 1.71 (dd,  $J = 7.8, 3.7$  Hz, 1H), 1.30 (dd,  $J = 20.8, 7.3$  Hz, 7H), 0.88 (t,  $J = 7.0$  Hz, 3H);  $^{13}\text{C}$  NMR (101 MHz,  $\text{CDCl}_3$ )  $\delta$  171.9, 148.1, 147.5, 145.5, 138.3, 136.3, 134.9, 134.5, 127.9, 127.4, 121.9, 121.5, 121.3, 116.4, 109.4, 108.0, 100.7, 40.2, 39.4, 35.6, 32.7, 29.0, 28.7, 23.0, 14.1. HRMS (ESI)  $m/z$  calculated for  $\text{C}_{25}\text{H}_{29}\text{N}_2\text{O}_3^+$   $[\text{M}+\text{H}]^+$  405.2173, found 405.2176.

#### **4-(naphthalen-2-ylmethyl)-*N*-(quinolin-8-yl)octanamide (2g)**

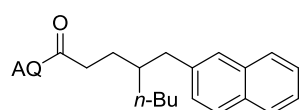

The title compound was isolated as a yellow oil (85% yield) after chromatography on silica with ethyl acetate:hexane (1:15).  $^1\text{H}$  NMR (400 MHz,  $\text{CDCl}_3$ )  $\delta$  9.77 (s, 1H), 8.79–8.73 (m, 2H), 8.10 (d,  $J = 7.2$  Hz, 1H), 7.56–7.39 (m, 9H), 7.32–7.23 (m, 3H), 2.66 (t,  $J = 7.0$  Hz, 2H), 2.63–2.49 (m, 3H), 1.88–1.78 (m, 3H), 1.39–1.25 (m, 7H), 0.89 (t,  $J = 6.6$  Hz, 3H);  $^{13}\text{C}$  NMR (101 MHz,  $\text{CDCl}_3$ )  $\delta$  171.8, 148.0, 138.7, 138.3, 136.3, 134.5, 133.5, 132.0, 127.9, 127.8, 127.8, 127.5, 127.4, 127.4, 127.4, 125.8, 125.0, 121.5, 121.3, 116.4, 40.6, 39.2, 35.7, 32.8, 29.2, 28.7, 23.0, 14.1. HRMS (ESI)  $m/z$  calculated for  $\text{C}_{28}\text{H}_{31}\text{N}_2\text{O}^+$   $[\text{M}+\text{H}]^+$  411.2431, found 411.2431.

#### **4-([1,1'-biphenyl]-4-ylmethyl)-*N*-(quinolin-8-yl)octanamide (2h)**

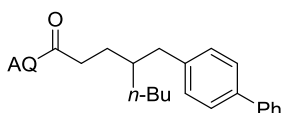

The title compound was isolated as a black oil (83% yield) after chromatography on silica with ethyl acetate:hexane (1:25).  $^1\text{H}$  NMR (400 MHz,  $\text{CDCl}_3$ )  $\delta$  9.77 (s, 1H), 8.79–8.73 (m, 2H), 8.10 (d,  $J = 7.2$  Hz, 1H), 7.56–7.39 (m, 9H), 7.32–7.23 (m, 3H), 2.66 (t,  $J = 7.0$  Hz, 2H), 2.63–2.49 (m, 3H), 1.88–1.78 (m, 3H), 1.39–1.25 (m, 7H), 0.89 (t,  $J = 6.6$  Hz, 3H);  $^{13}\text{C}$  NMR (101 MHz,  $\text{CDCl}_3$ )  $\delta$  171.9, 148.1, 141.1, 140.2, 138.6, 138.3, 136.3, 134.5, 129.6, 128.7, 127.9, 127.4, 126.9, 121.5, 121.4, 121.3, 116.4, 116.4, 40.0, 39.3, 35.6, 32.8, 29.1, 28.7, 23.0, 14.1. HRMS (ESI)  $m/z$  calculated for  $\text{C}_{30}\text{H}_{33}\text{N}_2\text{O}^+$   $[\text{M}+\text{H}]^+$  437.2587, found 437.2601.



#### 4-(4-(dimethylamino)benzyl)-N-(quinolin-8-yl)octanamide (2i)

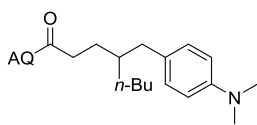

The title compound was isolated as a brown oil (52% yield) after chromatography on silica with ethyl acetate:hexane (1:20).  $^1\text{H}$  NMR (400 MHz,  $\text{CDCl}_3$ )  $\delta$  9.70 (s, 1H), 8.71 (m, 2H), 8.08 (dd,  $J = 8.3, 1.6$  Hz, 1H), 7.48–7.35 (m, 3H), 6.97 (t,  $J = 8.8$  Hz, 2H), 6.58 (dd,  $J = 14.6, 7.7$  Hz, 2H), 2.84–2.78 (m, 6H), 2.45 (m, 4H), 1.74 (m, 2H), 1.65 (d,  $J = 5.5$  Hz, 1H), 1.29–1.20 (m, 6H), 0.81 (t,  $J = 7.0$  Hz, 3H);  $^{13}\text{C}$  NMR (101 MHz,  $\text{CDCl}_3$ )  $\delta$  172.1, 148.9, 148.0, 138.3, 136.3, 134.6, 129.7, 129.2, 127.9, 127.4, 121.5, 121.2, 116.4, 112.9, 40.9, 39.5, 35.7, 32.7, 29.7, 29.1, 28.7, 23.0, 14.1. HRMS (ESI)  $m/z$  calculated for  $\text{C}_{26}\text{H}_{34}\text{N}_3\text{O}^+ [\text{M}+\text{H}]^+$  403.2696, found 403.2702.

#### N-(quinolin-8-yl)-4-(4-(trifluoromethoxy)benzyl)octanamide (2j)

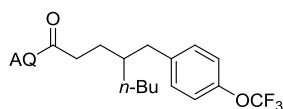

The title compound was isolated as a fulvous oil (92% yield) after chromatography on silica with ethyl acetate:hexane (1:20).  $^1\text{H}$  NMR (400 MHz,  $\text{CDCl}_3$ )  $\delta$  9.77 (s, 1H), 8.78 (dd,  $J = 9.4, 5.1$  Hz, 2H), 8.14 (dd,  $J = 8.2, 1.5$  Hz, 1H), 7.55–7.42 (m, 3H), 7.18 (d,  $J = 8.5$  Hz, 2H), 7.10 (d,  $J = 8.1$  Hz, 2H), 2.62 (d,  $J = 6.4$  Hz, 2H), 2.54 (m, 2H), 1.85–1.73 (m, 3H), 1.36–1.23 (m, 6H), 0.87 (t,  $J = 6.9$  Hz, 3H);  $^{13}\text{C}$  NMR (101 MHz,  $\text{CDCl}_3$ )  $\delta$  171.6, 148.1, 147.4, 139.8, 138.3, 136.3, 134.5, 130.3, 127.9, 127.4, 124.3, 121.8, 121.5, 121.3, 120.7, 119.2, 116.7, 116.4, 77.3, 77.0, 76.7, 39.7, 39.2, 35.5, 32.6, 29.0, 28.6, 22.9, 14.0;  $^{19}\text{F}$  NMR (376 MHz,  $\text{CDCl}_3$ )  $\delta$  -62.21. HRMS (ESI)  $m/z$  calculated for  $\text{C}_{25}\text{H}_{28}\text{F}_3\text{N}_2\text{O}_2^+ [\text{M}+\text{H}]^+$  445.2097, found 445.2098.

#### N-(quinolin-8-yl)-4-(4-(trifluoromethyl)benzyl)octanamide (2k)

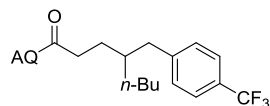

The title compound was isolated as a brown oil (93% yield) after chromatography on silica with ethyl acetate:hexane (1:20).  $^1\text{H}$  NMR (400 MHz,  $\text{CDCl}_3$ )  $\delta$  9.68 (s, 1H), 8.72–8.63 (m, 2H), 8.05 (dd,  $J = 8.3, 1.5$  Hz, 1H), 7.38 (m, 5H), 7.21–7.16 (m, 2H), 2.56 (t,  $J = 9.7$  Hz,

2H), 2.45 (m, 2H), 1.76–1.66 (m, 3H), 1.27–1.15 (m, 6H), 0.79 (t,  $J = 7.0$  Hz, 3H);  $^{13}\text{C}$  NMR (101 MHz,  $\text{CDCl}_3$ )  $\delta$  171.6, 148.1, 145.3, 138.3, 136.3, 134.5, 129.4, 128.6, 128.4, 128.3, 127.9, 127.9, 127.6, 127.4, 125.7, 125.2, 125.1, 125.1, 125.1, 123.0, 121.6, 121.4, 120.3, 116.4, 40.2, 39.1, 35.4, 32.6, 29.0, 28.6, 22.9, 14.0;  $^{19}\text{F}$  NMR (376 MHz,  $\text{CDCl}_3$ )  $\delta$  -62.21. HRMS (ESI)  $m/z$  calculated for  $\text{C}_{25}\text{H}_{28}\text{F}_3\text{N}_2\text{O}^+$   $[\text{M}+\text{H}]^+$  429.2148, found 429.2150.

#### 4-(4-fluorobenzyl)-*N*-(quinolin-8-yl)octanamide (2l)

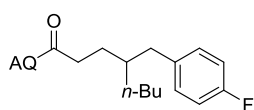

The title compound was isolated as a fulvous oil (95% yield) after chromatography on silica with ethyl acetate:hexane (1:20).  $^1\text{H}$  NMR (400 MHz,  $\text{CDCl}_3$ )  $\delta$  8.54 (d,  $J = 4.7$  Hz, 1H), 8.20 (d,  $J = 7.8$  Hz, 1H), 8.16 (br, 1H), 7.85 (m, 1H), 7.44–7.41 (m, 1H), 7.22 (dd,  $J = 8.6, 6.1$  Hz, 2H), 7.18–7.13 (m, 3H), 5.73 (m, 1H), 5.61–5.54 (m, 1H), 3.57 (dd,  $J = 13.2, 6.8$  Hz, 2H), 3.43 (d,  $J = 7.3$  Hz, 2H), 2.52 (m, 2H);  $^{13}\text{C}$  NMR (101 MHz,  $\text{CDCl}_3$ )  $\delta$  171.7, 162.4, 160.0, 148.1, 138.3, 136.6, 136.6, 136.3, 134.5, 130.4, 130.4, 127.9, 127.4, 121.6, 121.3, 116.3, 115.1, 114.8, 39.5, 39.3, 35.5, 32.6, 29.0, 28.6, 23.0, 14.1;  $^{19}\text{F}$  NMR (376 MHz,  $\text{CDCl}_3$ )  $\delta$  -117.80. HRMS (ESI)  $m/z$  calculated for  $\text{C}_{24}\text{H}_{28}\text{FN}_2\text{O}^+$   $[\text{M}+\text{H}]^+$  379.2180, found 378.2183.

#### 4-(4-chlorobenzyl)-*N*-(quinolin-8-yl)octanamide (2m)

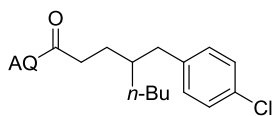

The title compound was isolated as a brown oil (93% yield) after chromatography on silica with ethyl acetate:hexane (1:15).  $^1\text{H}$  NMR (400 MHz,  $\text{CDCl}_3$ )  $\delta$  9.66 (s, 1H), 8.71–8.65 (m, 2H), 8.04 (dd,  $J = 8.3, 1.6$  Hz, 1H), 7.44–7.36 (m, 2H), 7.33 (dd,  $J = 8.3, 4.2$  Hz, 1H), 7.12 (d,  $J = 8.4$  Hz, 2H), 7.00 (d,  $J = 8.4$  Hz, 2H), 2.46 (m, 4H), 1.74–1.59 (m, 3H), 1.26–1.15 (m, 6H), 0.78 (t,  $J = 7.0$  Hz, 3H);  $^{13}\text{C}$  NMR (101 MHz,  $\text{CDCl}_3$ )  $\delta$  171.7, 148.1, 139.5, 138.3, 136.3, 134.5, 131.5, 130.5, 128.3, 127.9, 127.4, 121.6,

121.3, 116.3, 39.7, 39.2, 35.5, 32.6, 29.0, 28.6, 23.0, 14.1. HRMS (ESI)  $m/z$  calculated for  $C_{24}H_{28}ClN_2O^+$   $[M+H]^+$  395.1885, found 395.1885.

#### **4-(4-bromobenzyl)-N-(quinolin-8-yl)octanamide (2n)**

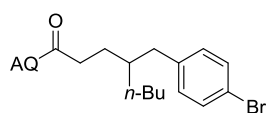

The title compound was isolated as a brown oil (87% yield) after chromatography on silica with ethyl acetate:hexane (1:15).

$^1H$  NMR (400 MHz,  $CDCl_3$ )  $\delta$  9.76 (s, 1H), 8.78 (m, 2H), 8.13 (dd,  $J = 8.3, 1.6$  Hz, 1H), 7.54–7.46 (m, 2H), 7.43 (dd,  $J = 8.3, 4.2$  Hz, 1H), 7.35 (dd,  $J = 6.1, 4.5$  Hz, 2H), 7.04 (d,  $J = 8.3$  Hz, 2H), 2.61–2.46 (m, 4H), 1.84–1.67 (m, 3H), 1.28 (m, 6H), 0.87 (t,  $J = 7.0$  Hz, 3H);  $^{13}C$  NMR (101 MHz,  $CDCl_3$ )  $\delta$  171.6, 148.1, 140.0, 138.3, 136.3, 134.5, 131.3, 130.9, 127.9, 127.4, 121.6, 121.3, 119.5, 116.3, 39.8, 39.2, 35.5, 32.6, 29.0, 28.6, 23.0, 14.1. HRMS (ESI)  $m/z$  calculated for  $C_{24}H_{28}BrN_2O^+$   $[M+H]^+$  439.1380, found 439.1380.

#### **4-(4-iodobenzyl)-N-(quinolin-8-yl)octanamide (2o)**

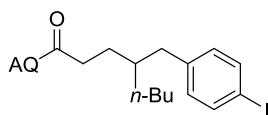

The title compound was isolated as a black oil (75% yield) after chromatography on silica with ethyl acetate:hexane

(1:20).  $^1H$  NMR (400 MHz,  $CDCl_3$ )  $\delta$  9.76 (s, 1H), 8.81–8.79 (m, 1H), 8.76 (dd,  $J = 7.3, 1.5$  Hz, 1H), 8.16 (dd,  $J = 8.3, 1.5$  Hz, 1H), 7.57–7.50 (m, 4H), 7.46–7.44 (m, 1H), 6.93 (d,  $J = 8.2$  Hz, 2H), 2.59–2.52 (m, 4H), 1.83–1.73 (m, 3H), 1.34–1.26 (m, 6H), 0.87 (t,  $J = 7.0$  Hz, 3H);  $^{13}C$  NMR (101 MHz,  $CDCl_3$ )  $\delta$  171.7, 148.1, 140.7, 138.3, 137.2, 136.4, 134.5, 131.2, 127.9, 127.4, 121.6, 121.3, 116.4, 90.9, 39.9, 39.1, 35.5, 32.6, 29.0, 28.6, 22.9, 14.0. HRMS (ESI)  $m/z$  calculated for  $C_{24}H_{28}IN_2O$   $[M+H]^+$  487.1241, found 487.1241.

#### **methyl 4-(2-(3-oxo-3-(quinolin-8-ylamino)propyl)hexyl)benzoate (2p)**

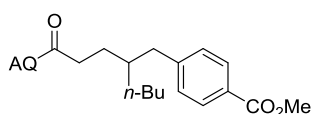

The title compound was isolated as a black oil (76% yield) after chromatography on silica with ethyl acetate:hexane

(1:15). <sup>1</sup>H NMR (400 MHz, CDCl<sub>3</sub>) δ 9.66 (s, 1H), 8.69 (m, 2H), 8.05 (dd, *J* = 8.3, 1.5 Hz, 1H), 7.85 (d, *J* = 8.2 Hz, 2H), 7.46–7.33 (m, 3H), 7.17 (t, *J* = 5.3 Hz, 2H), 3.79 (s, 3H), 2.67–2.37 (m, 4H), 1.81–1.65 (m, 3H), 1.21 (m, 6H), 0.78 (t, *J* = 7.0 Hz, 3H); <sup>13</sup>C NMR (101 MHz, CDCl<sub>3</sub>) δ 171.6, 167.1, 148.1, 146.8, 138.3, 136.3, 134.5, 129.6, 129.2, 127.9, 127.8, 127.4, 121.5, 121.3, 116.3, 51.9, 40.5, 39.1, 35.5, 32.7, 29.1, 28.6, 22.9, 14.0. HRMS (ESI) *m/z* calculated for C<sub>26</sub>H<sub>31</sub>N<sub>2</sub>O<sub>3</sub> [M+H]<sup>+</sup> 419.2329, found 419.2331.

#### 4-(4-cyanobenzyl)-*N*-(quinolin-8-yl)octanamide (2q)

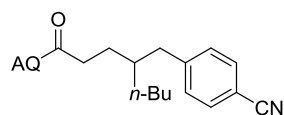

The title compound was isolated as a brown oil (98% yield) after chromatography on silica with ethyl acetate:hexane (1:6).

<sup>1</sup>H NMR (400 MHz, CDCl<sub>3</sub>) δ 9.65 (s, 1H), 8.71–8.63 (m, 2H), 8.05 (d, *J* = 8.2 Hz, 1H), 7.44–7.33 (m, 5H), 7.17 (d, *J* = 8.0 Hz, 2H), 2.61–2.51 (m, 2H), 2.51–2.37 (m, 2H), 1.75–1.64 (m, 3H), 1.25–1.15 (m, 6H), 0.78 (t, *J* = 6.9 Hz, 3H); <sup>13</sup>C NMR (101 MHz, CDCl<sub>3</sub>) δ 171.4, 148.1, 147.0, 138.2, 136.4, 134.4, 132.0, 129.9, 127.9, 127.4, 121.6, 121.4, 119.1, 116.3, 109.6, 40.6, 39.0, 35.4, 32.7, 29.0, 28.5, 22.9, 14.0. HRMS (ESI) *m/z* calculated for C<sub>25</sub>H<sub>28</sub>N<sub>3</sub>O<sup>+</sup> [M+H]<sup>+</sup> 386.2227, found 386.2228.

#### 4-(3-formylbenzyl)-*N*-(quinolin-8-yl)octanamide (2r)

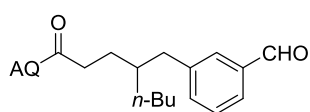

The title compound was isolated as a brown oil (94% yield) after chromatography on silica with ethyl acetate:hexane

(1:20). <sup>1</sup>H NMR (400 MHz, CDCl<sub>3</sub>) δ 9.95 (s, 1H), 9.76 (s, 1H), 8.79–8.74 (m, 2H), 8.16 (dd, *J* = 8.3, 1.6 Hz, 1H), 7.68–7.76 (m, 2H), 7.53–7.41 (m, 5H), 2.75–2.67 (m, 2H), 2.62–2.50 (m, 2H), 1.85–1.78 (m, 3H), 1.38–1.27 (m, 6H), 0.88 (t, *J* = 7.1 Hz, 3H); <sup>13</sup>C NMR (101 MHz, CDCl<sub>3</sub>) δ 192.5, 171.6, 148.1, 142.2, 138.2, 136.4, 136.3, 135.4, 134.4, 130.1, 128.9, 127.9, 127.5, 127.4, 121.6,

121.4, 116.3, 40.1, 39.2, 35.5, 32.6, 29.0, 28.6, 22.9, 14.0. HRMS (ESI)  $m/z$  calculated for  $C_{25}H_{29}N_2O_2^+$   $[M+H]^+$  389.2224, found 368.2223.

***N*-(3-(piperidin-1-yl)-4-(*o*-tolyl)butyl)picolinamide (2s)**

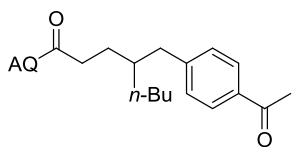

The title compound was isolated as a brown oil (90% yield) after chromatography on silica with ethyl acetate:hexane (1:15).  $^1H$  NMR (400 MHz,  $CDCl_3$ )  $\delta$  9.66 (s, 1H), 8.68 (dd,  $J = 8.3, 5.5$  Hz, 2H), 8.07–8.01 (m, 1H), 7.76 (d,  $J = 8.1$  Hz, 2H), 7.39 (m, 3H), 7.17 (d,  $J = 7.9$  Hz, 2H), 2.58 (s, 2H), 2.50–2.39 (m, 5H), 1.71 (dd,  $J = 13.8, 6.8$  Hz, 3H), 1.27–1.16 (m, 6H), 0.79 (t,  $J = 6.7$  Hz, 3H);  $^{13}C$  NMR (101 MHz,  $CDCl_3$ )  $\delta$  197.7, 171.6, 148.1, 147.1, 138.2, 136.3, 135.0, 134.4, 129.3, 128.4, 127.9, 127.4, 121.6, 121.4, 116.3, 40.4, 39.1, 35.5, 32.7, 29.1, 28.6, 26.5, 22.9, 14.0. HRMS (ESI)  $m/z$  calculated for  $C_{26}H_{31}N_2O_2^+$   $[M+H]^+$  403.2380, found 403.2380.

***4*-(furan-3-ylmethyl)-*N*-(quinolin-8-yl)octanamide (2t)**

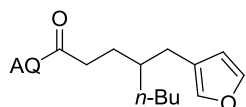

The title compound was isolated as a fulvous oil (70% yield) after chromatography on silica with ethyl acetate:hexane (1:20).  $^1H$  NMR (400 MHz,  $CDCl_3$ )  $\delta$  9.79 (s, 1H), 8.82–8.75 (m, 2H), 8.16 (d,  $J = 8.2$  Hz, 1H), 7.56–7.48 (m, 2H), 7.45 (dd,  $J = 8.3, 4.2$  Hz, 1H), 7.34 (s, 1H), 7.26 (d,  $J = 2.7$  Hz, 1H), 6.27 (s, 1H), 2.57 (dd,  $J = 8.9, 6.5$  Hz, 2H), 2.45 (d,  $J = 6.5$  Hz, 2H), 1.81 (dd,  $J = 15.0, 7.2$  Hz, 2H), 1.72–1.64 (m, 1H), 1.41–1.18 (m, 6H), 0.89 (t,  $J = 6.9$  Hz, 3H);  $^{13}C$  NMR (101 MHz,  $CDCl_3$ )  $\delta$  171.8, 148.1, 142.7, 139.7, 138.3, 136.3, 134.5, 127.9, 127.4, 123.0, 121.5, 121.3, 116.4, 111.5, 37.9, 35.6, 32.8, 29.1, 28.8, 28.7, 23.0, 14.1. HRMS (ESI)  $m/z$  calculated for  $C_{22}H_{27}N_2O_2^+$   $[M+H]^+$  351.2067, found 351.2061.

***N*-(quinolin-8-yl)-4-(thiophen-3-ylmethyl)octanamide (2u)**

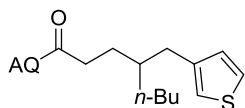

The title compound was isolated as a yellow oil (86% yield) after chromatography on silica with ethyl acetate:hexane (1:20).

$^1\text{H}$  NMR (400 MHz,  $\text{CDCl}_3$ )  $\delta$  9.77 (s, 1H), 8.78 (dd,  $J = 8.4$ , 5.1 Hz, 2H), 8.12 (dd,  $J = 5.0$ , 3.0 Hz, 1H), 7.52–7.42 (m, 3H), 7.22 (dd,  $J = 4.8$ , 3.0 Hz, 1H), 6.94 (dd,  $J = 8.6$ , 3.7 Hz, 2H), 2.67–2.63 (m, 2H), 2.56–2.51 (m, 2H), 1.81 (dd,  $J = 14.4$ , 6.6 Hz, 3H), 1.35–1.27 (m, 6H), 0.88 (t,  $J = 6.9$  Hz, 3H);  $^{13}\text{C}$  NMR (101 MHz,  $\text{CDCl}_3$ )  $\delta$  171.8, 148.1, 141.1, 138.3, 136.3, 134.5, 128.7, 127.9, 127.4, 125.1, 121.5, 121.3, 121.0, 116.4, 38.6, 35.6, 34.6, 32.9, 29.2, 28.7, 23.0, 14.1. HRMS (ESI)  $m/z$  calculated for  $\text{C}_{22}\text{H}_{27}\text{N}_2\text{OS}^+$   $[\text{M}+\text{H}]^+$  367.1839, found 367.1833.

#### **4-methyl-5-phenyl-N-(quinolin-8-yl)pentanamide (2v)**

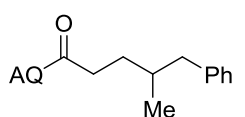

The title compound was isolated as a black oil (65% yield) after chromatography on silica with ethyl acetate:hexane (1:20).

$^1\text{H}$  NMR (400 MHz,  $\text{CDCl}_3$ )  $\delta$  9.80 (s, 1H), 8.78 (dd,  $J = 4.5$ , 2.8 Hz, 2H), 8.14 (s, 1H), 7.52–7.47 (m, 2H), 7.43 (d,  $J = 4.1$  Hz, 1H), 7.27–7.23 (m, 2H), 7.18–7.14 (m, 3H), 2.73 (dd,  $J = 13.3$ , 5.8 Hz, 1H), 2.66–2.52 (m, 3H), 2.45 (dd,  $J = 13.4$ , 8.0 Hz, 1H), 1.91 (dd,  $J = 7.1$ , 4.1 Hz, 1H), 1.74–1.66 (m, 1H), 0.94 (d,  $J = 6.5$  Hz, 3H);  $^{13}\text{C}$  NMR (101 MHz,  $\text{CDCl}_3$ )  $\delta$  171.8, 148.1, 140.9, 138.3, 136.4, 134.5, 129.2, 128.2, 127.9, 127.4, 125.8, 121.5, 121.3, 116.4, 43.5, 36.0, 34.7, 32.3, 19.2. HRMS (ESI)  $m/z$  calculated for  $\text{C}_{21}\text{H}_{23}\text{N}_2\text{O}^+$   $[\text{M}+\text{H}]^+$  319.1805, found 319.1808.

#### **4-benzyl-N-(quinolin-8-yl)hexanamide (2w)**

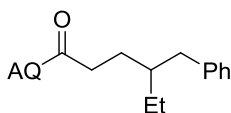

The title compound was isolated as a black oil (80% yield) after chromatography on silica with ethyl acetate:hexane (1:20).

$^1\text{H}$  NMR (400 MHz,  $\text{CDCl}_3$ )  $\delta$  9.78 (s, 1H), 8.79 (m, 2H), 8.16 (dd,  $J = 8.3$ , 1.6 Hz, 1H), 7.55–7.50 (m, 2H), 7.48–7.43 (m, 2H), 7.28–7.24 (m, 2H), 7.20–7.15 (m, 2H), 2.65–2.53 (m, 3H), 1.85–1.72 (m, 2H), 1.61–1.16 (m, 4H), 0.97–0.91 (m, 3H);  $^{13}\text{C}$  NMR (101 MHz,  $\text{CDCl}_3$ )  $\delta$  171.9, 148.0, 141.1, 136.4, 134.5, 129.2,

128.2, 127.9, 127.4, 125.7, 121.5, 121.3, 116.4, 40.77, 39.97, 35.67, 28.65, 25.35, 10.69. HRMS (ESI)  $m/z$  calculated for  $C_{22}H_{24}N_2O^+[M+H]^+$  333.1961, found 333.1966.

**4-benzyl-N-(quinolin-8-yl)octanamide (2x)**

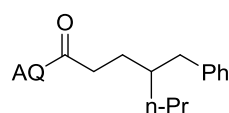

The title compound was isolated as a yellow oil (86% yield) after chromatography on silica with ethyl acetate:hexane (1:15).  $^1H$  NMR (400 MHz,  $CDCl_3$ )  $\delta$  9.78 (s, 1H), 8.78 (m, 2H), 8.14 (d,  $J = 8.3$  Hz, 1H), 7.52–7.42 (m, 3H), 7.26 (t,  $J = 7.2$  Hz, 2H), 7.17 (dd,  $J = 11.4, 7.3$  Hz, 3H), 2.67–2.44 (m, 4H), 1.90–1.69 (m, 3H), 1.29 (dd,  $J = 20.7, 9.8$  Hz, 6H), 0.87 (dd,  $J = 7.1, 5.7$  Hz, 3H);  $^{13}C$  NMR (101 MHz,  $CDCl_3$ )  $\delta$  171.9, 148.0, 141.1, 138.3, 136.4, 134.5, 129.2, 128.2, 127.9, 127.4, 125.7, 121.5, 121.3, 116.4, 40.45, 39.18, 35.62, 35.39, 29.12, 19.67, 14.42. HRMS (ESI)  $m/z$  calculated for  $C_{23}H_{27}N_2O^+[M+H]^+$  347.2118, found 347.2121.

**4-benzyl-N-(quinolin-8-yl)nonanamide (2y)**

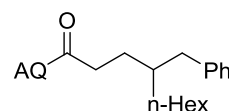

The title compound was isolated as a yellow oil (80% yield) after chromatography on silica with ethyl acetate:hexane (1:15).  $^1H$  NMR (400 MHz,  $CDCl_3$ )  $\delta$  9.77 (s, 1H), 8.80 (dd,  $J = 4.2, 1.7$  Hz, 1H), 8.76 (dd,  $J = 7.3, 1.5$  Hz, 1H), 8.15 (dd,  $J = 8.3, 1.6$  Hz, 1H), 7.53–7.49 (m, 2H), 7.47–7.42 (m, 2H), 7.25 (dd,  $J = 4.9, 2.3$  Hz, 2H), 7.19–7.15 (m, 2H), 2.64–2.59 (m, 2H), 2.55 (m, 2H), 1.85–1.76 (m, 3H), 1.33 (s, 4H), 1.25 (t,  $J = 7.2$  Hz, 6H), 0.86 (t,  $J = 6.8$  Hz, 3H);  $^{13}C$  NMR (101 MHz,  $CDCl_3$ )  $\delta$  172.3, 147.3, 141.1, 134.7, 134.1, 131.0, 129.2, 128.2, 127.9, 125.7, 121.5, 121.4, 40.4, 39.3, 35.5, 33.0, 31.8, 29.6, 29.1, 26.4, 22.6, 14.1. HRMS (ESI)  $m/z$  calculated for  $C_{25}H_{31}N_2O^+[M+H]^+$  375.2431, found 375,2431.

**4-benzyl-6-phenyl-N-(quinolin-8-yl)hexanamide (2z)**

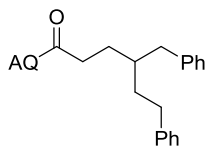

The title compound was isolated as a yellow oil (75% yield) after chromatography on silica with ethyl acetate:hexane (1:15). <sup>1</sup>H

NMR (400 MHz, CDCl<sub>3</sub>) δ 9.77 (s, 1H), 8.81–8.75 (m, 2H), 8.14 (dd, *J* = 8.3, 1.5 Hz, 1H), 7.56–7.39 (m, 4H), 7.27–7.12 (m, 9H), 2.75–2.58 (m, 4H), 2.58–2.44 (m, 2H), 1.88 (m, 3H), 1.66 (dd, *J* = 13.8, 8.1 Hz, 2H); <sup>13</sup>C NMR (101 MHz, CDCl<sub>3</sub>) δ 171.7, 148.1, 142.5, 140.7, 138.3, 136.4, 134.8, 134.5, 130.9, 129.2, 128.3, 127.9, 127.4, 125.9, 125.7, 121.6, 121.4, 116.4, 40.3, 38.9, 35.5, 34.9, 32.9, 29.1. HRMS (ESI) *m/z* calculated for C<sub>28</sub>H<sub>29</sub>N<sub>2</sub>O<sup>+</sup> [M+H]<sup>+</sup> 409.2274, found 409.2275.

#### **4-benzyl-7-phenyl-N-(quinolin-8-yl)heptanamide (2aa)**

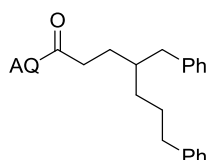

The title compound was isolated as a brown oil (80% yield) after chromatography on silica with ethyl acetate:hexane (1:15). <sup>1</sup>H NMR

(400 MHz, CDCl<sub>3</sub>) δ 9.17 (s, 1H), 8.52 (m, 1H), 8.16 (d, *J* = 7.8 Hz, 1H), 7.81 (m, 1H), 7.39 (m, 1H), 7.31 (d, *J* = 8.7 Hz, 2H), 7.13 (t, *J* = 7.7 Hz, 1H), 7.06 (d, *J* = 7.6 Hz, 1H), 3.69 (m, 1H), 3.24 (m, 1H), 3.02 (d, *J* = 12.5 Hz, 1H), 2.88–2.66 (m, 3H), 2.50 (s, 2H), 2.35–2.22 (m, 1H), 1.73 (s, 6H), 1.54–1.48 (m, 2H); <sup>13</sup>C NMR (101 MHz, CDCl<sub>3</sub>) δ 171.8, 148.1, 142.5, 140.9, 138.3, 136.9, 136.3, 134.5, 129.2, 128.4, 128.2, 127.9, 127.4, 125.8, 125.6, 121.5, 121.3, 116.4, 40.3, 39.2, 36.1, 35.5, 32.5, 29.1, 28.3. HRMS (ESI) *m/z* calculated for C<sub>29</sub>H<sub>31</sub>N<sub>2</sub>O<sup>+</sup> [M+H]<sup>+</sup> 423.2431, found 423.2436.

#### **4-benzyl-8-phenyl-N-(quinolin-8-yl)octanamide (2ab)**

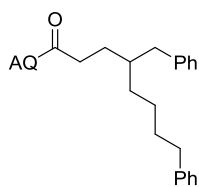

The title compound was isolated as a brown oil (85% yield) after chromatography on silica with ethyl acetate:hexane (1:15). <sup>1</sup>H NMR

(400 MHz, CDCl<sub>3</sub>) δ 9.76 (s, 1H), 8.80–8.75 (m, 2H), 8.15 (dd, *J* = 8.3, 1.6 Hz, 1H), 7.85–7.77 (m, 1H), 7.55–7.42 (m, 5H), 7.25 (d, *J* = 3.0 Hz, 2H), 7.18–7.11 (m, 5H), 2.63–2.51 (m, 5H), 1.86–1.74 (m, 2H), 1.60 (m, 3H), 1.44–1.33 (m, 4H), 0.94 (d, *J* = 6.5 Hz, 1H); <sup>13</sup>C NMR (101 MHz, CDCl<sub>3</sub>) δ 171.9,



148.0, 142.7, 141.0, 138.2, 136.5, 134.7, 134.5, 129.2, 128.4, 128.2, 127.9, 127.5, 125.8, 125.5, 121.5, 121.4, 116.6, 40.4, 39.3, 35.6, 32.8, 32.5, 31.7, 29.1, 26.1. HRMS (ESI)  $m/z$  calculated for  $C_{30}H_{33}N_2O^+$   $[M+H]^+$  437.2587, found 437.2594.

**4-benzyl-7,7,7-trifluoro-N-(quinolin-8-yl)heptanamide (2ac)**

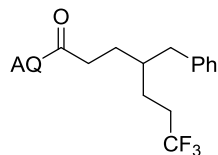

The title compound was isolated as a black oil (70% yield) after chromatography on silica with ethyl acetate:hexane (1:15).  $^1H$  NMR (400 MHz,  $CDCl_3$ )  $\delta$  9.33 (s, 1H), 8.66–8.62 (m, 1H), 8.18 (d,  $J = 7.8$  Hz, 1H), 8.15–8.05 (m, 1H), 7.83 (m, 1H), 7.42 (m, 1H), 7.28 (s, 1H), 7.20 (t,  $J = 7.4$  Hz, 1H), 7.14 (d,  $J = 7.0$  Hz, 2H), 3.76–3.67 (m, 1H), 3.18 (m, 3H), 3.06 (dd,  $J = 13.1, 3.6$  Hz, 1H), 2.88 (s, 7H), 2.35 (dd,  $J = 13.1, 10.3$  Hz, 1H), 1.77 (m, 1H), 1.59 (m, 1H);  $^{13}C$  NMR (101 MHz,  $CDCl_3$ )  $\delta$  164.5, 150.2, 148.1, 137.4, 130.2, 129.3, 128.6, 128.5, 126.1, 122.3, 69.5, 51.6, 39.6, 35.1, 35.1, 27.9;  $^{19}F$  NMR (376 MHz,  $CDCl_3$ )  $\delta$  -66.35. HRMS (ESI)  $m/z$  calculated for  $C_{23}H_{24}F_3N_2O^+$   $[M+H]^+$  401.1835, found 401.1838.

**4-benzyl-7-cyano-N-(quinolin-8-yl)heptanamide (2ad)**

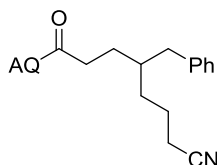

The title compound was isolated as a brown oil (75% yield) after chromatography on silica with ethyl acetate:hexane (1:6).  $^1H$  NMR (400 MHz,  $CDCl_3$ )  $\delta$  9.68 (s, 1H), 8.68 (dd,  $J = 16.5, 4.6$  Hz, 2H), 8.13 (d,  $J = 7.1$  Hz, 1H), 8.06–8.01 (m, 1H), 7.41–7.38 (m, 2H), 7.34 (dd,  $J = 8.2, 4.2$  Hz, 1H), 7.17 (t,  $J = 7.4$  Hz, 2H), 7.07 (d,  $J = 7.7$  Hz, 2H), 2.63–2.54 (m, 1H), 2.47 (dd,  $J = 13.8, 6.7$  Hz, 3H), 2.16 (m, 2H), 1.77–1.64 (m, 3H), 1.63–1.51 (m, 2H), 1.34 (dd,  $J = 10.1, 5.7$  Hz, 2H);  $^{13}C$  NMR (101 MHz,  $CDCl_3$ )  $\delta$  170.3, 147.1, 139.1, 137.2, 135.3, 134.5, 133.3, 128.0, 127.3, 126.8, 126.3, 125.0, 120.6, 120.4, 118.6, 115.3, 39.2, 37.6, 34.2, 31.2, 27.8, 21.5, 16.3. HRMS (ESI)  $m/z$  calculated for  $C_{24}H_{26}N_3O^+$   $[M+H]^+$  372.2070, found 372.2081.

**4-benzyl-7-((tert-butyl dimethylsilyl)oxy)-N-(quinolin-8-yl)heptanamide (2ae)**

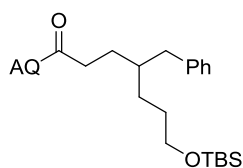

The title compound was isolated as a brown oil (80% yield) after chromatography on silica with ethyl acetate:hexane (1:20).  $^1\text{H}$  NMR (400 MHz,  $\text{CDCl}_3$ )  $\delta$  9.75 (s, 1H), 8.78–8.72 (m, 2H), 8.10 (dd,  $J = 8.3, 1.5$  Hz, 1H), 7.51–7.43 (m, 2H), 7.40 (dd,  $J = 8.3, 4.2$  Hz, 1H), 7.22 (dd,  $J = 9.5, 5.2$  Hz, 2H), 7.17–7.12 (m, 2H), 3.54 (d,  $J = 6.5$  Hz, 1H), 2.62–2.49 (m, 3H), 1.80 (t,  $J = 7.1$  Hz, 2H), 1.63–1.49 (m, 2H), 1.48–1.28 (m, 2H), 0.88–0.80 (m, 9H), -0.00 (s, 6H);  $^{13}\text{C}$  NMR (101 MHz,  $\text{CDCl}_3$ )  $\delta$  171.8, 148.0, 140.9, 138.3, 136.3, 134.5, 129.2, 128.3, 127.9, 127.4, 125.8, 121.5, 121.3, 116.4, 63.4, 40.4, 39.2, 35.5, 29.7, 29.1, 26.0, 26.0, 18.3, -5.2. HRMS (ESI)  $m/z$  calculated for  $\text{C}_{29}\text{H}_{41}\text{N}_2\text{O}_2\text{Si}^+$   $[\text{M}+\text{H}]^+$  477.2932, found 477.2937.

**ethyl 5-benzyl-8-oxo-8-(quinolin-8-ylamino)octanoate (2af)**

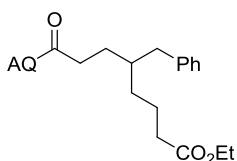

The title compound was isolated as a brown oil (65% yield) after chromatography on silica with ethyl acetate:hexane (1:12).  $^1\text{H}$  NMR (400 MHz,  $\text{CDCl}_3$ )  $\delta$  9.69 (s, 1H), 8.70 (m, 2H), 8.07 (dd,  $J = 8.2, 1.2$  Hz, 1H), 7.46–7.34 (m, 3H), 7.18 (t,  $J = 7.5$  Hz, 2H), 7.09 (d,  $J = 7.5$  Hz, 2H), 4.02 (q,  $J = 7.2$  Hz, 2H), 2.56 (d,  $J = 5.8$  Hz, 1H), 2.48 (dd,  $J = 14.6, 7.7$  Hz, 2H), 2.19 (t,  $J = 7.4$  Hz, 2H), 1.80–1.51 (m, 5H), 1.32–1.19 (m, 2H), 1.15 (t,  $J = 7.2$  Hz, 3H);  $^{13}\text{C}$  NMR (101 MHz,  $\text{CDCl}_3$ )  $\delta$  173.5, 171.6, 148.1, 140.7, 138.3, 136.3, 134.5, 129.1, 128.3, 127.9, 127.4, 125.8, 121.5, 121.3, 116.4, 60.2, 40.2, 39.1, 35.5, 34.5, 32.4, 28.9, 21.9, 14.2. HRMS (ESI)  $m/z$  calculated for  $\text{C}_{26}\text{H}_{31}\text{N}_2\text{O}_3^+$   $[\text{M}+\text{H}]^+$  419.2329, found 419.2329.

**4-benzyl-7-oxo-7-(quinolin-8-ylamino)heptyl benzoate (2ag)**

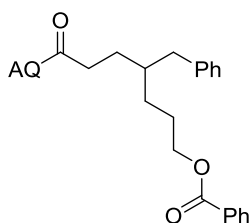

The title compound was isolated as a yellow oil (85% yield) after chromatography on silica with ethyl acetate:hexane (1:12).  $^1\text{H}$  NMR (400 MHz,  $\text{CDCl}_3$ )  $\delta$  9.79 (s, 1H), 8.77 (t,  $J = 4.2$  Hz, 2H),

8.13 (dd,  $J = 8.2, 1.3$  Hz, 1H), 8.00 (t,  $J = 8.2$  Hz, 2H), 7.50 (m, 3H), 7.42 (m, 3H), 7.24 (t,  $J = 7.3$  Hz, 2H), 7.17 (dd,  $J = 12.8, 7.0$  Hz, 3H), 4.32–4.24 (m, 2H), 2.71 (dd,  $J = 13.6, 5.5$  Hz, 1H), 2.60 (m, 3H), 1.93–1.78 (m, 5H), 1.56–1.42 (m, 2H);  $^{13}\text{C}$  NMR (101 MHz,  $\text{CDCl}_3$ )  $\delta$  171.6, 166.6, 148.1, 140.6, 138.3, 136.3, 134.5, 132.8, 130.4, 129.5, 129.1, 128.3, 128.3, 127.9, 127.4, 125.9, 121.6, 121.4, 116.4, 65.1, 40.2, 39.0, 35.5, 29.2, 29.1, 25.7. HRMS (ESI)  $m/z$  calculated for  $\text{C}_{30}\text{H}_{31}\text{N}_2\text{O}_3^+$   $[\text{M}+\text{H}]^+$  467.2329, found 467.2328.

**4-benzyl-6-(1,3-dioxolan-2-yl)-N-(quinolin-8-yl)hexanamide (2ah)**

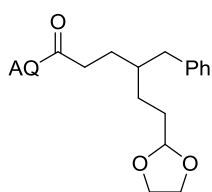

The title compound was isolated as a black oil (85% yield) after chromatography on silica with ethyl acetate:hexane (1:12).  $^1\text{H}$  NMR (400 MHz,  $\text{CDCl}_3$ )  $\delta$  9.67 (s, 1H), 8.69 (m, 2H), 8.05 (dd,  $J = 8.3, 1.5$  Hz, 1H), 7.44–7.37 (m, 2H), 7.34 (dd,  $J = 8.3, 4.2$  Hz, 1H), 7.17 (t,  $J = 7.4$  Hz, 2H), 7.08 (dd,  $J = 13.0, 7.0$  Hz, 3H), 4.75 (t,  $J = 4.7$  Hz, 1H), 3.89–3.81 (m, 2H), 3.76–3.70 (m, 2H), 2.61–2.36 (m, 4H), 1.80–1.59 (m, 5H), 1.40 (m, 2H);  $^{13}\text{C}$  NMR (101 MHz,  $\text{CDCl}_3$ )  $\delta$  171.7, 148.1, 140.7, 138.3, 136.3, 134.5, 129.2, 128.3, 127.9, 127.4, 125.9, 121.5, 121.3, 116.4, 104.7, 64.8, 40.3, 39.2, 35.4, 30.8, 28.9, 27.1. HRMS (ESI)  $m/z$  calculated for  $\text{C}_{25}\text{H}_{28}\text{N}_2\text{O}_3^+$   $[\text{M}+\text{H}]^+$  405.2173, found 405.2178.

**4-benzyl-7-(1,3-dioxoisindolin-2-yl)-N-(quinolin-8-yl)heptanamide (2ai)**

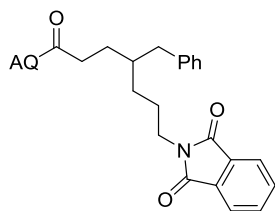

The title compound was isolated as a brown oil (65% yield) after chromatography on silica with ethyl acetate:hexane (1:6).  $^1\text{H}$  NMR (400 MHz,  $\text{CDCl}_3$ )  $\delta$  9.76 (s, 1H), 8.79 (dd,  $J = 4.2, 1.7$  Hz, 1H), 8.74 (dd,  $J = 7.2, 1.6$  Hz, 1H), 8.14 (dd,  $J = 8.3, 1.6$  Hz, 1H), 7.81 (m, 2H), 7.68 (dd,  $J = 5.4, 3.1$  Hz, 2H), 7.54–7.47 (m, 2H), 7.44 (dd,  $J = 8.3, 4.2$  Hz, 1H), 7.25–7.04 (m, 5H), 3.66 (t,  $J = 7.2$  Hz, 2H), 2.57 (m, 4H), 1.86–1.70 (m, 5H), 1.39 (m, 2H);  $^{13}\text{C}$  NMR (101 MHz,  $\text{CDCl}_3$ )  $\delta$  171.6, 168.4, 148.1, 140.5,

138.3, 136.3, 134.5, 133.8, 132.1, 129.1, 128.2, 127.9, 127.4, 125.8, 123.1, 121.5, 121.3, 116.4, 40.1, 38.9, 38.1, 35.5, 29.9, 29.0, 25.4. HRMS (ESI)  $m/z$  calculated for  $C_{31}H_{30}N_3O_3^+$   $[M+H]^+$  492.2282, found 492.2286.

**4-benzyl-N-(quinolin-8-yl)oct-7-enamide (2aj)**

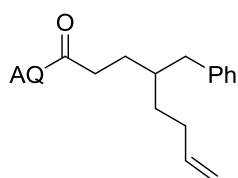

The title compound was isolated as a brown oil (62% yield) after chromatography on silica with ethyl acetate:hexane (1:15).  $^1H$  NMR (400 MHz,  $CDCl_3$ )  $\delta$  9.76 (s, 1H), 8.80–8.75 (m, 2H), 8.14 (dd,  $J = 8.3, 1.5$  Hz, 1H), 7.84–7.77 (m, 1H), 7.54–7.45 (m, 3H), 7.45–7.41 (m, 2H), 7.26 (s, 1H), 7.18 (d,  $J = 7.4$  Hz, 3H), 5.77 (m, 1H), 5.03–4.89 (m, 2H), 2.63 (t,  $J = 6.0$  Hz, 2H), 2.54 (m, 2H), 2.19–2.08 (m, 2H), 1.86–1.78 (m, 3H), 1.43 (dd,  $J = 13.4, 7.7$  Hz, 2H);  $^{13}C$  NMR (101 MHz,  $CDCl_3$ )  $\delta$  172.0, 147.5, 140.8, 138.8, 137.4, 134.1, 129.5, 129.2, 128.2, 128.1, 127.8, 125.8, 121.5, 121.4, 117.5, 114.5, 40.2, 38.8, 35.4, 32.2, 30.8, 29.0. HRMS (ESI)  $m/z$  calculated for  $C_{24}H_{27}N_2O^+$   $[M+H]^+$  359.2118, found 359.2121.

**5-phenyl-N-(quinolin-8-yl)-4-(tetrahydro-2H-pyran-4-yl)pentanamide (2ak)**

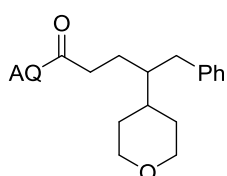

The title compound was isolated as a brown oil (40% yield) after chromatography on silica with ethyl acetate:hexane (1:15).  $^1H$  NMR (400 MHz,  $CDCl_3$ )  $\delta$  9.16 (s, 1H), 8.50–8.43 (m, 1H), 8.15 (d,  $J = 7.8$  Hz, 1H), 7.80 (m, 1H), 7.42–7.34 (m, 2H), 7.24 (d,  $J = 1.5$  Hz, 1H), 7.20–7.14 (m, 1H), 7.14–7.08 (m, 2H), 3.75–3.50 (m, 5H), 3.24 (m, 1H), 3.00 (dd,  $J = 13.1, 3.5$  Hz, 1H), 2.94–2.66 (m, 3H), 2.62–2.43 (m, 2H), 2.31 (dd,  $J = 13.0, 10.2$  Hz, 1H), 1.76 (dd,  $J = 10.0, 4.9$  Hz, 1H), 1.61 (m, 1H), 1.47 (s, 9H);  $^{13}C$  NMR (101 MHz,  $CDCl_3$ )  $\delta$  171.5, 148.0, 141.1, 138.3, 136.3, 134.4, 129.0, 128.4, 127.9, 127.4, 125.9, 121.5, 121.4, 116.4, 68.4, 44.5, 37.4, 37.0, 36.1, 29.7, 29.5, 26.0. HRMS (ESI)  $m/z$  calculated for  $C_{25}H_{29}N_2O_2^+$   $[M+H]^+$  389.2224, found 389.2225.

**(2*S*,4*S*)-4-(4-cyanobenzyl)-2-methyl-*N*-(quinolin-8-yl)hexanamide (2a)**

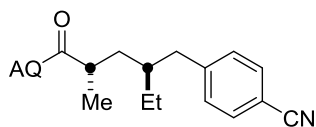

The title compound was isolated as a yellow oil (54% yield) after chromatography on silica with ethyl acetate:hexane (1:6). This product was isolated as a single diastereomer. The reported dr was determined by  $^1\text{H}$  NMR analysis. The following analytical data correspond to the mixture.  $^1\text{H}$  NMR (400 MHz,  $\text{CDCl}_3$ )  $\delta$  9.78 (s, 1H), 8.81 (dd,  $J = 4.2, 1.6$  Hz, 1H), 8.78 (dd,  $J = 6.9, 2.0$  Hz, 1H), 8.17 (dd,  $J = 8.3, 1.6$  Hz, 1H), 7.53 (dd,  $J = 12.0, 5.1$  Hz, 2H), 7.47 (dd,  $J = 8.3, 2.8$  Hz, 3H), 7.25 (d,  $J = 8.2$  Hz, 2H), 2.74 (dd,  $J = 13.6, 6.5$  Hz, 1H), 2.63 (dd,  $J = 13.7, 7.5$  Hz, 2H), 1.95 (m, 1H), 1.73 (dd,  $J = 13.0, 6.6$  Hz, 1H), 1.43–1.38 (m, 1H), 1.34–1.29 (m, 2H), 1.28 (d,  $J = 6.8$  Hz, 3H), 0.91 (dd,  $J = 9.3, 5.5$  Hz, 3H);  $^{13}\text{C}$  NMR (101 MHz,  $\text{CDCl}_3$ )  $\delta$  174.9, 148.2, 147.1, 138.4, 136.4, 134.4, 132.0, 129.9, 127.9, 127.4, 121.6, 121.5, 119.0, 116.5, 109.6, 40.6, 40.4, 39.0, 38.2, 26.0, 18.5, 10.4. HRMS (ESI)  $m/z$  calculated for  $\text{C}_{24}\text{H}_{26}\text{N}_3\text{O}^+$   $[\text{M}+\text{H}]^+$  372.2070, found 372.2070.

**(3*S*,4*R*)-4-benzyl-3-methyl-*N*-(quinolin-8-yl)octanamide (2a)**

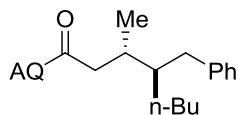

The title compound was isolated as a yellow oil (70% yield) after chromatography on silica with ethyl acetate:hexane (1:15). This product was isolated as a single diastereomer. The reported dr was determined by GC-MS analysis. The following analytical data correspond to the mixture.  $^1\text{H}$  NMR (400 MHz,  $\text{CDCl}_3$ )  $\delta$  9.80 (s, 1H), 8.81–8.77 (m, 2H), 8.18–8.13 (m, 1H), 7.54–7.44 (m, 3H), 7.26–7.15 (m, 5H), 2.74–2.57 (m, 2H), 2.49–2.38 (m, 2H), 1.72 (s, 1H), 1.36–1.20 (m, 6H), 1.04 (dd,  $J = 16.2, 6.3$  Hz, 3H), 0.87–0.79 (m, 3H);  $^{13}\text{C}$  NMR (101 MHz,  $\text{CDCl}_3$ )  $\delta$  171.5, 148.1, 141.7, 138.3, 136.3, 134.5, 129.2, 128.2, 127.9, 127.4, 125.6, 121.5, 121.3, 116.4, 44.5, 43.0, 36.8, 31.9, 30.2, 29.7, 22.9, 15.7, 14.0. HRMS (ESI)  $m/z$  calculated for  $\text{C}_{25}\text{H}_{31}\text{N}_2\text{O}^+$   $[\text{M}+\text{H}]^+$  375.2431, found 375.2432.

**(*R*)-4-benzyl-3,3-dimethyl-*N*-(quinolin-8-yl)octanamide (2a)**

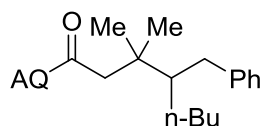

The title compound was isolated as an orange oil (30% yield) after chromatography on silica with ethyl acetate:hexane (1:15).

$^1\text{H}$  NMR (400 MHz,  $\text{CDCl}_3$ )  $\delta$  9.78 (s, 1H), 8.82–8.78 (m, 2H), 8.16 (dd,  $J = 8.3, 1.6$  Hz, 1H), 7.55–7.49 (m, 2H), 7.45 (dd,  $J = 8.3, 4.2$  Hz, 1H), 7.25–7.21 (m, 4H), 7.16–7.12 (m, 1H), 3.02 (dd,  $J = 13.7, 3.9$  Hz, 1H), 2.54 (s, 2H), 2.38 (dd,  $J = 13.7, 9.1$  Hz, 1H), 1.75–1.70 (m, 1H), 1.56–1.50 (m, 1H), 1.26 (d,  $J = 5.2$  Hz, 1H), 1.21 (s, 3H), 1.19 (s, 3H), 1.14–1.06 (m, 3H), 0.92–0.87 (m, 1H), 0.71 (t,  $J = 7.1$  Hz, 3H);  $^{13}\text{C}$  NMR (101 MHz,  $\text{CDCl}_3$ )  $\delta$  170.8, 148.1, 142.6, 138.4, 136.3, 134.5, 129.1, 128.1, 127.9, 127.4, 125.5, 121.5, 121.3, 116.3, 49.6, 48.6, 37.7, 37.5, 31.9, 30.4, 25.5, 23.0, 13.8. HRMS (ESI)  $m/z$  calculated for  $\text{C}_{25}\text{H}_{31}\text{N}_2\text{O}^+$   $[\text{M}+\text{H}]^+$  389.2587, found 375.2592.

**(3S,4R)-4-(4-cyanobenzyl)-3-phenyl-N-(quinolin-8-yl)hexanamide (2ao)**

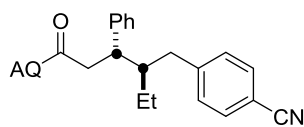

The title compound was isolated as a white solid (70% yield) after chromatography on silica with ethyl acetate:hexane (1:6). This product was isolated as a single diastereomer. The

reported dr was determined by  $^1\text{H}$  NMR analysis. The following analytical data correspond to the mixture.  $^1\text{H}$  NMR (400 MHz,  $\text{CDCl}_3$ )  $\delta$  9.66 (s, 1H), 8.75 (m, 1H), 8.67 (dd,  $J = 6.2, 2.7$  Hz, 1H), 8.14 (dd,  $J = 8.2, 1.5$  Hz, 1H), 7.49 (dd,  $J = 8.9, 5.3$  Hz, 4H), 7.44 (dd,  $J = 8.3, 4.3$  Hz, 1H), 7.29 (dd,  $J = 7.7, 5.7$  Hz, 4H), 7.22–7.14 (m, 3H), 3.48 (m, 1H), 3.12–2.99 (m, 1H), 2.92 (dd,  $J = 14.7, 9.0$  Hz, 1H), 2.73 (dd,  $J = 13.7, 4.8$  Hz, 1H), 2.37 (dd,  $J = 13.7, 9.4$  Hz, 1H), 2.05–2.00 (m, 1H), 1.42–1.30 (m, 2H), 0.93 (m, 3H);  $^{13}\text{C}$  NMR (101 MHz,  $\text{CDCl}_3$ )  $\delta$  170.1, 148.0, 147.5, 142.0, 138.2, 136.3, 134.2, 132.0, 129.8, 128.5, 128.4, 127.8, 127.3, 126.7, 121.5, 121.4, 119.1, 116.4, 109.6, 46.2, 43.7, 41.5, 37.2, 22.3, 10.5. HRMS (ESI)  $m/z$  calculated for  $\text{C}_{29}\text{H}_{28}\text{N}_3\text{O}^+$   $[\text{M}+\text{H}]^+$  434.2227, found 434.2227.

**(S)-4-((R)-1-phenylethyl)-N-(quinolin-8-yl)octanamide (2ap)**

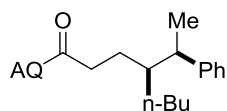

The title compound was isolated as a yellow oil (80% yield) after chromatography on silica with ethyl acetate:hexane (1:15). This product was isolated as a single diastereomer. The reported dr was determined by GC-MS analysis. The following analytical data correspond to the mixture.  $^1\text{H}$  NMR (400 MHz,  $\text{CDCl}_3$ )  $\delta$  9.71 (s, 1H), 8.76 (m, 2H), 8.12 (d,  $J = 8.3$  Hz, 1H), 7.52–7.40 (m, 3H), 7.30–7.10 (m, 5H), 2.80 (m, 1H), 2.57–2.36 (m, 2H), 1.83–1.74 (m, 1H), 1.73–1.60 (m, 2H), 1.35 (m, 3H), 1.28 (dd,  $J = 12.3, 5.0$  Hz, 6H), 0.87 (dd,  $J = 9.4, 4.2$  Hz, 3H);  $^{13}\text{C}$  NMR (101 MHz,  $\text{CDCl}_3$ )  $\delta$  171.9, 48.0, 146.3, 138.3, 136.3, 134.5, 128.2, 127.9, 127.7, 127.4, 125.8, 121.5, 121.3, 116.3, 43.6, 41.9, 35.9, 29.4, 28.7, 27.2, 23.1, 17.91, 14.11. HRMS (ESI)  $m/z$  calculated for  $\text{C}_{25}\text{H}_{31}\text{N}_2\text{O}^+$   $[\text{M}+\text{H}]^+$  375.2431, found 375.2430.

***(S)*-4-((*S*)-1-phenylethyl)-*N*-(quinolin-8-yl)octanamide (2aq)**

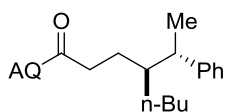

The title compound was isolated as a fulvous oil (75% yield) after chromatography on silica with ethyl acetate:hexane (1:20). This product was isolated as a single diastereomer. The reported dr was determined by GC-MS analysis. The following analytical data correspond to the mixture.  $^1\text{H}$  NMR (400 MHz,  $\text{CDCl}_3$ )  $\delta$  9.75 (s, 1H), 8.78 (dd,  $J = 13.7, 5.2$  Hz, 2H), 8.15 (d,  $J = 8.1$  Hz, 1H), 7.52 (dd,  $J = 14.8, 7.2$  Hz, 2H), 7.46–7.43 (m, 1H), 7.26 (d,  $J = 7.7$  Hz, 2H), 7.22–7.13 (m, 3H), 2.82 (p,  $J = 7.0$  Hz, 1H), 2.58–2.50 (m, 1H), 2.46–2.37 (m, 1H), 1.97–1.84 (m, 1H), 1.83–1.74 (m, 1H), 1.67 (dd,  $J = 10.1, 5.4$  Hz, 1H), 1.34–1.18 (m, 9H), 0.87–0.81 (m, 3H);  $^{13}\text{C}$  NMR (101 MHz,  $\text{CDCl}_3$ )  $\delta$  172.0, 148.0, 146.5, 138.3, 136.4, 134.5, 128.1, 127.9, 127.7, 127.4, 125.8, 121.5, 121.3, 116.4, 43.6, 41.6, 35.6, 30.6, 29.0, 25.6, 22.9, 17.3, 14.1. HRMS (ESI)  $m/z$  calculated for  $\text{C}_{25}\text{H}_{31}\text{N}_2\text{O}^+$   $[\text{M}+\text{H}]^+$  375.2431, found 375.2430.

***(S)*-4-benzhydryl-*N*-(quinolin-8-yl)octanamide (2ar)**

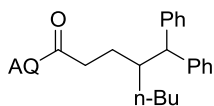

The title compound was isolated as a yellow oil (62% yield) after chromatography on silica with ethyl acetate:hexane (1:15).  $^1\text{H}$  NMR (400 MHz,  $\text{CDCl}_3$ )  $\delta$  9.66 (s, 1H), 8.76 (m, 2H), 8.13 (dd,  $J = 8.3, 1.4$  Hz, 1H), 7.53–7.40 (m, 4H), 7.35–7.10 (m, 10H), 3.75 (d,  $J = 11.0$  Hz, 1H), 2.58–2.32 (m, 3H), 1.96–1.71 (m, 2H), 1.46–1.03 (m, 7H), 0.82 (m, 3H);  $^{13}\text{C}$  NMR (101 MHz,  $\text{CDCl}_3$ )  $\delta$  171.8, 148.0, 144.3, 144.1, 138.3, 136.3, 134.7, 134.5, 130.9, 128.6, 128.5, 128.1, 127.9, 127.4, 126.2, 121.5, 121.3, 116.3, 56.4, 40.1, 34.9, 30.1, 27.8, 26.7, 23.0, 14.0. HRMS (ESI)  $m/z$  calculated for  $\text{C}_{30}\text{H}_{33}\text{N}_2\text{O}^+$   $[\text{M}+\text{H}]^+$  437.2587, found 437.2587.

***(S)*-4-((*S*)-(4-cyanophenyl)(phenyl)methyl)-*N*-(quinolin-8-yl)hexanamide (2as)**

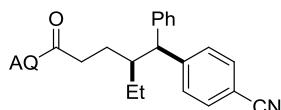

The title compound was isolated as a white solid (75% yield) after chromatography on silica with ethyl acetate:hexane (1:6). This product was isolated as a single diastereomer. The reported dr was determined by  $^1\text{H}$  NMR analysis. The following analytical data correspond to the mixture.  $^1\text{H}$  NMR (400 MHz,  $\text{CDCl}_3$ )  $\delta$  9.58 (s, 1H), 8.71 (dd,  $J = 4.2, 1.6$  Hz, 1H), 8.65 (dd,  $J = 7.1, 1.8$  Hz, 1H), 8.08 (dd,  $J = 8.3, 1.6$  Hz, 1H), 7.41 (m, 7H), 7.19 (t,  $J = 3.7$  Hz, 4H), 7.12–7.07 (m, 1H), 3.74 (d,  $J = 11.2$  Hz, 1H), 2.46–2.29 (m, 3H), 1.79–1.70 (m, 1H), 1.69–1.62 (m, 1H), 1.43 (m, 1H), 1.29–1.23 (m, 1H), 0.80 (d,  $J = 7.4$  Hz, 3H);  $^{13}\text{C}$  NMR (101 MHz,  $\text{CDCl}_3$ )  $\delta$  171.2, 149.8, 148.1, 142.7, 138.2, 136.4, 134.4, 132.5, 128.8, 128.8, 128.0, 127.9, 127.4, 126.7, 121.7, 121.5, 118.8, 116.3, 110.0, 56.1, 40.6, 34.9, 26.0, 22.2, 9.2. HRMS (ESI)  $m/z$  calculated for  $\text{C}_{29}\text{H}_{28}\text{N}_3\text{O}^+$   $[\text{M}+\text{H}]^+$  434.2232, found 434.2232.

***4*-(1,2-diphenylethyl)-*N*-(quinolin-8-yl)octanamide (2at)**

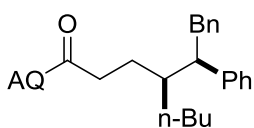

The title compound was isolated as a yellow oil (80% yield) after chromatography on silica with ethyl acetate:hexane (1:12). This product was isolated as a 2:1 mixture of diastereomers.



The reported dr was determined by  $^1\text{H}$  NMR analysis. The following analytical data correspond to the mixture.  $^1\text{H}$  NMR (400 MHz,  $\text{CDCl}_3$ )  $\delta$  9.64 (s, 1H), 9.59 (s, 1H), 8.72–8.66 (m, 2H), 8.65 (m, 1H), 8.07–8.02 (m, 1H), 7.73 (m, 1H), 7.47–7.37 (m, 4H), 7.36–7.31 (m, 2H), 7.16–7.08 (m, 3H), 7.05–6.96 (m, 8H), 6.92 (m, 3H), 3.06 (m, 1H), 2.95–2.82 (m, 2H), 2.81–2.72 (m, 1H), 2.49–2.20 (m, 3H), 1.98–1.87 (m, 1H), 1.75 (m, 1H), 1.68–1.59 (m, 2H), 1.46–1.05 (m, 11H), 0.80 (t,  $J = 7.1$  Hz, 3H), 0.74 (m, 2H);  $^{13}\text{C}$  NMR (101 MHz,  $\text{CDCl}_3$ )  $\delta$  171.9, 171.3, 148.1, 148.0, 144.6, 142.8, 141.0, 141.0, 140.5, 138.3, 136.3, 136.3, 134.5, 129.9, 129.1, 129.0, 128.8, 128.5, 128.4, 128.3, 128.2, 128.0, 127.9, 127.9, 127.7, 127.4, 126.0, 126.0, 125.7, 125.5, 121.5, 121.5, 121.3, 121.2, 116.4, 116.3, 50.0, 45.6, 44.4, 43.6, 41.7, 39.1, 35.7, 33.2, 32.7, 30.2, 28.8, 28.0, 26.7, 26.5, 23.0, 22.9, 14.1, 14.0. HRMS (ESI)  $m/z$  calculated for  $\text{C}_{27}\text{H}_{31}\text{N}_3\text{O}^+$   $[\text{M}+\text{H}]^+$  451.2744, found 451.2744.

***N*-(2-(2-phenyl-1-(piperidin-1-yl)ethyl)hexyl)picolinamide (2au)**

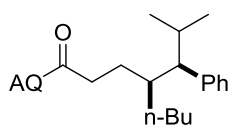

The title compound was isolated as a fulvous oil (82% yield) after chromatography on silica with ethyl acetate:hexane (1:15). This product was isolated as a single diastereomer. The reported dr was determined by GC-MS analysis. The following analytical data correspond to the mixture.  $^1\text{H}$  NMR (400 MHz,  $\text{CDCl}_3$ )  $\delta$  9.65 (s, 1H), 8.73–8.66 (m, 2H), 8.08 (dd,  $J = 8.3, 1.6$  Hz, 1H), 7.45–7.36 (m, 3H), 7.19–7.14 (m, 2H), 7.12–7.03 (m, 3H), 2.49 (m, 1H), 2.39–2.28 (m, 2H), 2.13 (dd,  $J = 14.5, 6.7$  Hz, 1H), 1.95 (m, 1H), 1.90–1.80 (m, 1H), 1.36–1.15 (m, 9H), 0.84 (dd,  $J = 12.4, 6.8$  Hz, 6H), 0.64 (dd,  $J = 11.8, 7.0$  Hz, 3H);  $^{13}\text{C}$  NMR (101 MHz,  $\text{CDCl}_3$ )  $\delta$  172.0, 147.9, 141.6, 138.2, 136.4, 134.5, 129.7, 127.9, 127.6, 127.4, 125.8, 121.5, 121.2, 116.4, 54.8, 38.2, 36.1, 30.2, 28.9, 28.5, 26.1, 23.1, 21.7, 20.2, 14.1. HRMS (ESI)  $m/z$  calculated for  $\text{C}_{27}\text{H}_{35}\text{N}_2\text{O}^+$   $[\text{M}+\text{H}]^+$  403.2744, found 403.2744.

***(S)*-4-((*R*)-cyclohexyl(phenyl)methyl)-*N*-(quinolin-8-yl)octanamide (2av)**

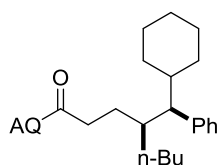

The title compound was isolated as a brown oil (85% yield) after chromatography on silica with ethyl acetate:hexane (1:15). This product was isolated as a single diastereomer. The reported dr was determined by GC-MS analysis.  $^1\text{H}$  NMR (400 MHz,  $\text{CDCl}_3$ )  $\delta$  9.65 (s, 1H), 8.72–8.65 (m, 2H), 8.04 (dd,  $J = 8.3, 1.6$  Hz, 1H), 7.45–7.38 (m, 2H), 7.34 (dd,  $J = 8.2, 4.2$  Hz, 1H), 7.16 (m, 2H), 7.12–6.99 (m, 3H), 2.51–2.44 (m, 1H), 2.43–2.21 (m, 2H), 2.01–1.78 (m, 2H), 1.77–1.65 (m, 2H), 1.61–1.48 (m, 3H), 1.40–0.94 (m, 11H), 0.87–0.77 (m, 3H), 0.76–0.62 (m, 2H);  $^{13}\text{C}$  NMR (101 MHz,  $\text{CDCl}_3$ )  $\delta$  172.0, 148.0, 141.8, 138.3, 136.3, 134.5, 129.7, 127.9, 127.7, 127.4, 125.8, 121.5, 121.2, 116.3, 53.9, 38.5, 37.3, 36.2, 32.0, 30.8, 30.2, 29.0, 26.6, 26.2, 23.0, 14.2. HRMS (ESI)  $m/z$  calculated for  $\text{C}_{30}\text{H}_{39}\text{N}_2\text{O}$   $[\text{M}+\text{H}]^+$  443.3057, found 443.3058.

***(S)*-4-((*R*)-(4-cyanophenyl)(furan-2-yl)methyl)-*N*-(quinolin-8-yl)octanamide (2aw)**

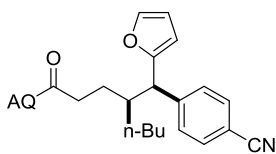

The title compound was isolated as a white solid (75% yield) after chromatography on silica with ethyl acetate:hexane (1:6). This product was isolated as a single diastereomer. The reported dr was determined by  $^1\text{H}$  NMR analysis.  $^1\text{H}$  NMR (400 MHz,  $\text{CDCl}_3$ )  $\delta$  9.66 (s, 1H), 8.80 (dd,  $J = 4.2, 1.4$  Hz, 1H), 8.72 (dd,  $J = 6.8, 2.0$  Hz, 1H), 8.17 (dd,  $J = 8.3, 1.3$  Hz, 1H), 7.53 (t,  $J = 7.5$  Hz, 4H), 7.46 (t,  $J = 7.3$  Hz, 3H), 7.33 (d,  $J = 1.5$  Hz, 1H), 6.30–6.27 (m, 1H), 6.15 (d,  $J = 3.2$  Hz, 1H), 3.98 (d,  $J = 9.7$  Hz, 1H), 2.52–2.37 (m, 2H), 1.74–1.65 (m, 2H), 1.52–1.44 (m, 1H), 1.39–1.30 (m, 2H), 0.90 (t,  $J = 7.4$  Hz, 3H);  $^{13}\text{C}$  NMR (101 MHz,  $\text{CDCl}_3$ )  $\delta$  171.1, 154.9, 148.1, 147.0, 141.7, 138.2, 136.4, 134.3, 132.3, 129.2, 127.9, 127.4, 121.7, 121.5, 118.8, 116.3, 110.4, 110.2, 106.9, 48.9, 41.9, 35.1, 26.2, 23.0, 10.0. HRMS (ESI)  $m/z$  calculated for  $\text{C}_{29}\text{H}_{30}\text{N}_3\text{O}_2^+$   $[\text{M}+\text{H}]^+$  452.2338, found 452.2339.

**(S)-4-((R)-(4-cyanophenyl)(thiophen-2-yl)methyl)-N-(quinolin-8-yl)hexanamide**

**(2ax)**

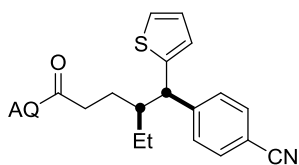

The title compound was isolated as a white solid (70% yield) after chromatography on silica with ethyl acetate:hexane (1:6). This product was isolated as a 20:1 mixture of diastereomers. The reported dr was determined by  $^1\text{H}$  NMR analysis.  $^1\text{H}$  NMR (400 MHz,  $\text{CDCl}_3$ )  $\delta$  9.66 (s, 1H), 8.80 (dd,  $J = 4.2, 1.7$  Hz, 1H), 8.72 (dd,  $J = 6.9, 2.1$  Hz, 1H), 8.17 (dd,  $J = 8.3, 1.6$  Hz, 1H), 7.55–7.44 (m, 7H), 7.18–7.13 (m, 1H), 6.93–6.88 (m, 2H), 4.17 (d,  $J = 10.2$  Hz, 1H), 2.55–2.41 (m, 2H), 2.33 (m, 1H), 1.85–1.77 (m, 1H), 1.71–1.65 (m, 1H), 1.56 (m, 1H), 1.44 (dd,  $J = 12.0, 4.6$  Hz, 1H), 0.96–0.90 (m, 3H).  $^{13}\text{C}$  NMR (101 MHz,  $\text{CDCl}_3$ )  $\delta$  171.1, 148.9, 148.1, 146.1, 138.2, 136.4, 134.3, 132.5, 128.9, 127.9, 127.4, 126.7, 124.8, 124.1, 121.7, 121.5, 118.8, 116.3, 110.4, 50.8, 43.4, 34.9, 26.1, 22.7, 9.9. HRMS (ESI)  $m/z$  calculated for  $\text{C}_{27}\text{H}_{25}\text{N}_3\text{O}_3^+$   $[\text{M}+\text{H}]^+$  440.1791, found 440.1791.

**5-benzyl-N-(quinolin-8-yl)nonanamide (2ay)**

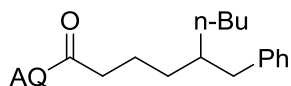

The title compound was isolated as a colorless oil (60% yield) after chromatography on silica with ethyl acetate:hexane (1:3).  $^1\text{H}$  NMR (400 MHz,  $\text{CDCl}_3$ )  $\delta$  9.74 (s, 1H), 8.78–8.74 (m, 2H), 8.10 (dd,  $J = 8.3, 1.6$  Hz, 1H), 7.47 (dd,  $J = 12.2, 4.5$  Hz, 2H), 7.39 (dd,  $J = 8.2, 4.2$  Hz, 1H), 7.24 (t,  $J = 7.4$  Hz, 2H), 7.17–7.10 (m, 3H), 2.53–2.43 (m, 3H), 1.81–1.48 (m, 6H), 1.34–1.08 (m, 6H), 0.81 (t,  $J = 7.2$  Hz, 3H);  $^{13}\text{C}$  NMR (101 MHz,  $\text{CDCl}_3$ )  $\delta$  171.8, 148.1, 146.1, 138.4, 136.4, 134.6, 128.25, 128.0, 127.7, 127.4, 125.8, 121.6, 121.3, 116.4, 45.9, 38.2, 36.7, 29.9, 27.4, 25.8, 22.8, 14.1. HRMS (ESI)  $m/z$  calculated for  $\text{C}_{25}\text{H}_{30}\text{N}_2\text{O}^+$   $[\text{M}+\text{H}]^+$  374.2358, found 374.2358.

**4-benzyl-8-oxo-8-(quinolin-8-ylamino)octyl benzoate (2az)**

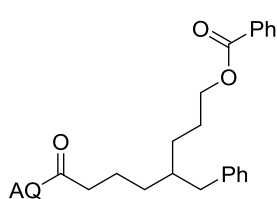

The title compound was isolated as a colorless oil (59% yield) after chromatography on silica with ethyl acetate:hexane (1:3).  $^1\text{H}$  NMR (400 MHz,  $\text{CDCl}_3$ )  $\delta$  9.75 (s, 1H), 8.81–8.73 (m, 2H), 8.15 (dd,  $J = 8.2, 1.4$  Hz, 1H), 8.06–7.96 (m, 2H), 7.56–7.40 (m, 6H), 7.26 (t,  $J = 3.7$  Hz, 2H), 7.23–7.13 (m, 3H), 4.23 (t,  $J = 6.3$  Hz, 2H), 2.64–2.55 (m, 1H), 2.55–2.42 (m, 2H), 1.82–1.60 (m, 6H), 1.36–1.32 (m, 1H), 1.31–1.20 (m, 2H), 0.90–0.83 (m, 1H);  $^{13}\text{C}$  NMR (101 MHz,  $\text{CDCl}_3$ )  $\delta$  171.7, 166.6, 148.0, 145.1, 138.3, 136.3, 134.5, 132.7, 130.4, 129.5, 128.4, 128.3, 127.9, 127.6, 127.4, 126.1, 121.5, 121.3, 116.4, 65.0, 45.6, 38.1, 36.7, 33.1, 27.2, 26.8, 25.6. HRMS (ESI)  $m/z$  calculated for  $\text{C}_{31}\text{H}_{33}\text{N}_2\text{O}_3^+[\text{M}+\text{H}]^+$  481.2486, found 481.2486.

#### 5-(4-methoxybenzyl)-N-(quinolin-8-yl)nonanamide (2ba)

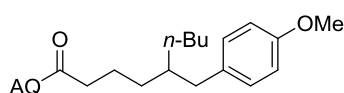

The title compound was isolated as a colorless oil (50% yield) after chromatography on silica with ethyl acetate:hexane (1:15).  $^1\text{H}$  NMR (400 MHz,  $\text{CDCl}_3$ )  $\delta$  9.75 (s, 1H), 8.79–8.75 (m, 2H), 8.14 (dd,  $J = 8.3, 1.5$  Hz, 1H), 7.53–7.47 (m, 2H), 7.44 (dd,  $J = 8.3, 4.2$  Hz, 1H), 7.04 (d,  $J = 8.6$  Hz, 2H), 6.79 (d,  $J = 8.6$  Hz, 2H), 3.76 (s, 3H), 2.51–2.41 (m, 3H), 1.94–1.62 (m, 4H), 1.61–1.44 (m, 2H), 1.31–1.18 (m, 4H), 1.17–1.05 (m, 2H), 0.81 (t,  $J = 7.2$  Hz, 3H);  $^{13}\text{C}$  NMR (101 MHz,  $\text{CDCl}_3$ )  $\delta$  171.8, 157.6, 148.0, 138.3, 138.0, 136.3, 134.5, 128.4, 127.9, 127.4, 121.5, 121.3, 116.4, 113.6, 55.1, 44.9, 38.2, 36.8, 33.1, 29.8, 27.3, 25.7, 22.7, 14.0. HRMS (ESI)  $m/z$  calculated for  $\text{C}_{26}\text{H}_{33}\text{N}_2\text{O}_2^+[\text{M}+\text{H}]^+$  405.2537, found 405.2536.

#### 5-(3-formylbenzyl)-N-(quinolin-8-yl)nonanamide (2bb)

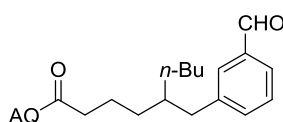

The title compound was isolated as a colorless oil (73% yield) after chromatography on silica with ethyl acetate:hexane (1:12).  $^1\text{H}$  NMR (400 MHz,  $\text{CDCl}_3$ )  $\delta$  9.97 (s, 1H), 9.74 (s, 1H), 8.81–8.73 (m, 2H), 8.14 (d,  $J = 8.1$  Hz, 1H), 7.70–7.63 (m, 2H), 7.51 (dd,  $J =$

12.9, 5.7 Hz, 2H), 7.47–7.39 (m, 3H), 2.63–2.57 (m, 1H), 2.49 (dd,  $J = 9.1, 5.8$  Hz, 1H), 1.77 (dd,  $J = 16.5, 8.4$  Hz, 2H), 1.69–1.52 (m, 3H), 1.47–0.93 (m, 8H), 0.86–0.74 (m, 3H);  $^{13}\text{C}$  NMR (101 MHz,  $\text{CDCl}_3$ )  $\delta$  192.6, 171.6, 148.1, 147.2, 138.3, 136.5, 136.3, 134.5, 134.0, 128.9, 128.6, 127.9, 127.7, 127.4, 121.5, 121.3, 116.4, 45.7, 38.0, 36.5, 36.4, 29.7, 27.2, 25.6, 22.6, 13.9. HRMS (ESI)  $m/z$  calculated for  $\text{C}_{26}\text{H}_{31}\text{N}_2\text{O}_2^+[\text{M}+\text{H}]^+$  403.2308, found 403.2308.

### *N*-(quinolin-8-yl)-5-(4-(trifluoromethoxy)benzyl)nonanamide (**2bc**)

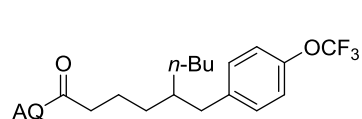

The title compound was isolated as a fulvous oil (65% yield) after chromatography on silica with ethyl acetate:hexane (1:15).  $^1\text{H}$  NMR (400 MHz,  $\text{CDCl}_3$ )  $\delta$  9.76 (s, 1H), 8.82–8.74 (m, 2H), 8.16 (dd,  $J = 8.3, 1.6$  Hz, 1H), 7.56–7.48 (m, 2H), 7.45 (dd,  $J = 8.3, 4.2$  Hz, 1H), 7.14–7.06 (m, 3H), 2.54–2.45 (m, 2H), 1.87–1.45 (m, 6H), 1.42–0.94 (m, 7H), 0.89–0.74 (m, 3H);  $^{13}\text{C}$  NMR (101 MHz,  $\text{CDCl}_3$ )  $\delta$  171.6, 148.0, 147.2, 144.7, 138.3, 137.8, 137.7, 136.3, 134.5, 128.7, 127.9, 127.4, 121.5, 121.3, 120.7, 119.2, 116.4, 45.3, 38.0, 36.6, 36.6, 29.7, 27.2, 25.6, 22.6, 13.9.  $^{19}\text{F}$  NMR (376 MHz,  $\text{CDCl}_3$ )  $\delta$  -57.83. HRMS (ESI)  $m/z$  calculated for  $\text{C}_{25}\text{H}_{30}\text{N}_2\text{O}^+[\text{M}+\text{H}]^+$  374.2358, found 374.2358.

## 6. Derivatization of **2a**

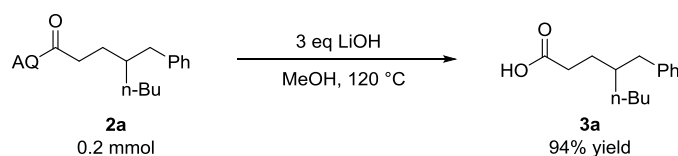

### *4*-benzyloctanoic acid (**3a**)

To a 10 mL schlenk tube equipped with a magnetic stir bar were added LiOH (3 eq), 8-aminoquinoline amide **2a** (0.2 mmol, 75.0 mg) and methanol (1 mL). The resulting mixture was stirred at 120 °C for 16 h. At this time, the reaction mixture was allowed to cool

to room temperature, diluted with 50 mL of EtOAc and washed with HCl (1 M, 3 × 2 mL). The organic layers were combined, dried over Na<sub>2</sub>SO<sub>4</sub>, and concentrated in vacuo to give pure hydrolysis free acid product. The title compound was isolated as a yellow oil (44.2 mg, 94% yield) <sup>1</sup>H NMR (400 MHz, CDCl<sub>3</sub>) δ 10.60 (s, 1H), 7.29–7.24 (m, 2H), 7.21–7.09 (m, 3H), 2.53 (m, 2H), 2.34 (dd, *J* = 16.9, 7.9 Hz, 2H), 1.64 (m, 3H), 1.27 (dd, *J* = 9.9, 6.9 Hz, 6H), 0.87 (dd, *J* = 8.0, 4.0 Hz, 3H); <sup>13</sup>C NMR (101 MHz, CDCl<sub>3</sub>) δ 180.4, 140.9, 129.1, 128.2, 125.8, 40.2, 39.1, 32.2, 31.5, 28.5, 28.0, 22.9, 14.0. HRMS (ESI) *m/z* calculated for C<sub>15</sub>H<sub>23</sub>O<sub>2</sub><sup>+</sup>[M+H]<sup>+</sup> 235.1693, found 235.1693.

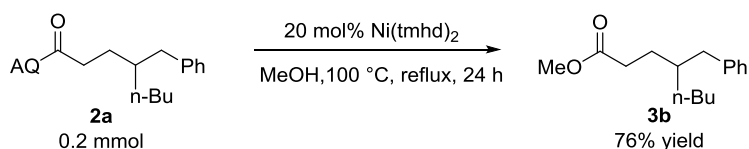

#### *methyl 4-benzyl-2-n-butyl-2-oxooctanoate (3b)*

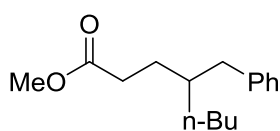

To a 10 mL schlenk tube equipped with a magnetic stir bar were added Ni(tmhd)<sub>2</sub> (20 mol%, 18.0 mg), **2a** (0.2 mmol, 75.0 mg) and methanol (1 mL) under an argon atmosphere. After the tube was tightly sealed, the mixture was allowed to stir at 100 °C for 24 h. After cooling to room temperature, methanol was removed and the crude mixture was directly purified by flash silica gel column chromatography (eluent: 7:1 ethyl acetate:hexane) to give **3b** as a black oil (38 mg, 76% yield). <sup>1</sup>H NMR (400 MHz, CDCl<sub>3</sub>) δ 7.26 (t, *J* = 7.3 Hz, 2H), 7.20–7.11 (m, 3H), 3.64 (s, 3H), 2.54 (m, 2H), 2.36–2.23 (m, 2H), 1.66–1.57 (m, 3H), 1.26 (d, *J* = 4.2 Hz, 6H), 0.87 (t, *J* = 5.9 Hz, 3H); <sup>13</sup>C NMR (101 MHz, CDCl<sub>3</sub>) δ 174.3, 141.0, 129.1, 128.2, 125.7, 51.4, 40.2, 39.1, 32.5, 31.5, 28.6, 28.3, 22.9, 14.0. HRMS (ESI) *m/z* calculated for C<sub>16</sub>H<sub>25</sub>O<sub>2</sub><sup>+</sup>[M+H]<sup>+</sup> 249.1849, found 249.1849.

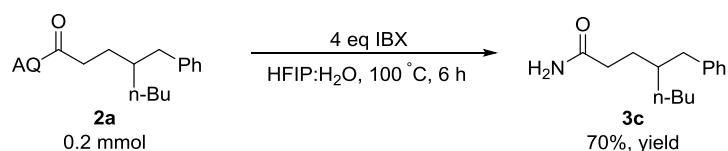

#### 4-benzyloctanamide (3c)

To a 10 mL schlenk tube equipped with a magnetic stir bar were added **2a** (0.2 mmol, 1 eq), IBX (2-iodoxybenzoic acid, 0.8 mmol, 4 eq), and HFIP:H<sub>2</sub>O (1:1) 3 mL under an argon atmosphere. After the tube was tightly sealed, the mixture was allowed to stir at 100 °C for 6 h.<sup>[4]</sup> After cooling to room temperature, and the crude mixture was directly purified by flash silica gel column chromatography (eluent: 1:1 ethyl acetate : hexane) to give amide **3c** as a brown oil (33 mg, 70% yield). <sup>1</sup>H NMR (400 MHz, CDCl<sub>3</sub>) δ 7.20 (dd, *J* = 8.3, 6.6 Hz, 2H), 7.10 (dd, *J* = 17.6, 7.2 Hz, 3H), 5.39 (d, *J* = 63.8 Hz, 2H), 2.54 (dd, *J* = 13.6, 6.5 Hz, 1H), 2.43 (dd, *J* = 13.6, 7.1 Hz, 1H), 2.18–2.05 (m, 2H), 1.58–1.51 (m, 2H), 1.32–1.25 (m, 1H), 1.24–1.16 (m, 6H), 0.80 (t, *J* = 6.7 Hz, 3H); <sup>13</sup>C NMR (101 MHz, CDCl<sub>3</sub>) δ 175.7, 141.1, 129.1, 128.2, 125.8, 40.4, 39.2, 33.3, 32.8, 29.0, 28.6, 22.9, 14.0. HRMS (ESI) *m/z* calculated for C<sub>15</sub>H<sub>24</sub>NO<sup>+</sup>[M+H]<sup>+</sup> 234.1852, found 234.1852.

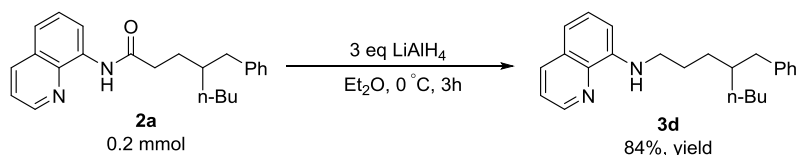

#### 4-benzyloctanamide (3d)

To a 10 mL schlenk tube equipped with a magnetic stir bar were added LiAlH<sub>4</sub> (0.6 mmol, 3 eq), **2a** (0.2 mmol, 1 eq) and diethyl ether (1 mL). After the tube was tightly sealed, the mixture was allowed to stir at 0 °C for 3 h. And the crude mixture was directly purified by flash silica gel column chromatography (eluent: 1:15 ethyl acetate:hexane) to give amide **3d** as a black oil (48.6 mg, 70% yield). <sup>1</sup>H NMR (400 MHz, CDCl<sub>3</sub>) δ 8.60 (dd, *J* = 4.2, 1.6 Hz, 1H), 7.93 (dd, *J* = 8.3, 1.5 Hz, 1H), 7.29–7.21 (m, 2H), 7.15 (t, *J* = 7.3 Hz,

2H), 7.09–7.02 (m, 3H), 6.92 (d,  $J = 7.6$  Hz, 1H), 6.53 (d,  $J = 7.5$  Hz, 1H), 6.02 (s, 1H), 3.15 (d,  $J = 4.3$  Hz, 2H), 2.53–2.42 (m, 2H), 1.70 (m, 3H), 1.33 (dd,  $J = 14.5, 7.7$  Hz, 2H), 1.18 (d,  $J = 11.7$  Hz, 6H), 0.78 (t,  $J = 6.9$  Hz, 3H);  $^{13}\text{C}$  NMR (101 MHz,  $\text{CDCl}_3$ )  $\delta$  146.7, 141.4, 135.9, 129.1, 128.7, 128.1, 127.8, 125.6, 121.3, 113.4, 104.4, 43.8, 40.4, 39.5, 32.8, 30.6, 28.8, 26.2, 23.0, 14.1. HRMS (ESI)  $m/z$  calculated for  $\text{C}_{24}\text{H}_{30}\text{N}_2^+[\text{M}+\text{H}]^+$  347.2482, found 347.2482.

**4-(((8R,9S,13S,14S)-13-methyl-17-oxo-7,8,9,11,12,13,14,15,16,17-decahydro-6H-cyclopenta[a]phenanthren-3-yl)methyl)-N-(quinolin-8-yl)octanamide (4a)**

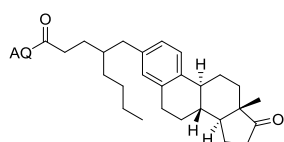

The title compound was isolated as a white solid (67% yield) after chromatography on silica with ethyl acetate:hexane (1:8).

$^1\text{H}$  NMR (400 MHz,  $\text{CDCl}_3$ )  $\delta$  9.68 (d,  $J = 4.3$  Hz, 1H), 8.76–8.67 (m, 2H), 8.09 (dd,  $J = 8.3, 1.5$  Hz, 1H), 7.48–7.36 (m, 3H), 7.09 (dd,  $J = 7.9, 2.9$  Hz, 1H), 6.89 (d,  $J = 7.9$  Hz, 1H), 6.83 (s, 1H), 2.82–2.73 (m, 2H), 2.47 (m, 5H), 2.34–2.27 (m, 1H), 2.17–1.85 (m, 5H), 1.74 (dd,  $J = 14.4, 6.9$  Hz, 3H), 1.59–1.38 (m, 6H), 1.30–1.20 (m, 6H), 0.84–0.79 (m, 6H);  $^{13}\text{C}$  NMR (101 MHz,  $\text{CDCl}_3$ )  $\delta$  170.9, 147.0, 137.4, 137.3, 136.0, 135.3, 135.1, 133.5, 128.7, 128.7, 126.9, 126.4, 125.6, 124.1, 120.5, 120.2, 115.3, 49.5, 46.9, 43.2, 38.8, 38.2, 37.1, 34.8, 34.6, 31.8, 30.6, 28.3, 28.0, 27.6, 25.5, 24.6, 22.0, 20.5, 13.1, 12.8. HRMS (ESI)  $m/z$  calculated for  $\text{C}_{36}\text{H}_{45}\text{N}_2\text{O}_2^+[\text{M}+\text{H}]^+$  537.3476, found 537.3476.

**Isopropyl**

**2-methyl-2-(4-(4-(2-(3-oxo-3-(quinolin-8-**

**ylamino)propyl)hexyl)benzoyl)phenoxy)propanoate (4b)**

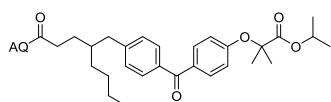

The title compound was isolated as a colorless oil (87% yield) after chromatography on silica with ethyl acetate:hexane (1:12).

$^1\text{H}$  NMR (400 MHz,  $\text{CDCl}_3$ )  $\delta$  9.70 (s, 1H), 8.68 (d,  $J = 6.5$  Hz, 2H), 8.05 (d,  $J = 7.5$  Hz, 1H), 7.66 (d,  $J = 8.6$  Hz, 2H), 7.60 (d,  $J = 7.9$  Hz, 2H), 7.46–7.38 (m, 2H), 7.34 (dd,  $J = 8.2, 4.2$  Hz, 1H), 7.19 (d,  $J$



= 8.0 Hz, 2H), 6.76 (d,  $J = 8.7$  Hz, 2H), 4.99 (m, 1H), 2.61 (d,  $J = 2.9$  Hz, 2H), 2.49 (m, 2H), 1.75 (s, 3H), 1.57 (s, 6H), 1.30–1.20 (m, 6H), 1.11 (d,  $J = 6.3$  Hz, 6H), 0.80 (t,  $J = 6.9$  Hz, 3H);  $^{13}\text{C}$  NMR (101 MHz,  $\text{CDCl}_3$ )  $\delta$  195.2, 173.1, 171.6, 159.3, 148.1, 145.9, 138.3, 136.3, 135.7, 134.5, 131.9, 130.9, 130.0, 129.0, 127.9, 127.4, 121.6, 121.4, 117.2, 116.3, 79.3, 69.3, 40.4, 39.2, 35.5, 32.7, 29.1, 28.6, 25.4, 22.9, 21.5, 14.0. HRMS (ESI)  $m/z$  calculated for  $\text{C}_{36}\text{H}_{45}\text{N}_2\text{O}_2^+[\text{M}+\text{H}]^+$  609.3323, found 609.3323.

**4-benzyl-7-oxo-7-(quinolin-8-ylamino)heptyl 2-(3-cyano-4-isobutoxyphenyl)-4-methylthiazole-5-carboxylate (4c)**

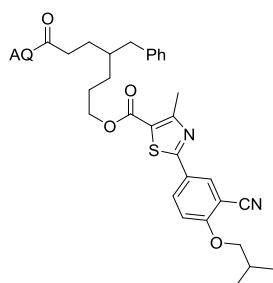

The title compound was isolated as a colorless oil (45% yield) after chromatography on silica with ethyl acetate:hexane (1:8).  $^1\text{H}$  NMR (400 MHz,  $\text{CDCl}_3$ )  $\delta$  9.78 (s, 1H), 8.79–8.74 (m, 2H), 8.17–8.12 (m, 2H), 8.04 (dd,  $J = 8.8, 2.3$  Hz, 1H), 7.55–7.48 (m, 2H), 7.45 (dd,  $J = 8.3, 4.2$  Hz, 1H), 7.24 (d,  $J = 7.4$  Hz, 2H), 7.17 (dd,  $J = 16.0, 7.3$  Hz, 3H), 6.94 (d,  $J = 8.9$  Hz, 1H), 4.26 (t,  $J = 6.4$  Hz, 2H), 3.88 (d,  $J = 6.5$  Hz, 2H), 2.72 (s, 3H), 2.61 (t,  $J = 6.3$  Hz, 2H), 2.23–2.18 (m, 1H), 1.87 (dd,  $J = 6.1, 3.3$  Hz, 2H), 1.57 (d,  $J = 13.0$  Hz, 2H), 1.52–1.44 (m, 2H), 1.25 (s, 2H), 1.09 (d,  $J = 6.7$  Hz, 6H);  $^{13}\text{C}$  NMR (101 MHz,  $\text{CDCl}_3$ )  $\delta$  171.3, 167.0, 162.3, 161.8, 160.9, 147.9, 140.4, 138.1, 136.2, 134.3, 132.4, 131.9, 129.0, 128.2, 127.8, 127.3, 125.9, 125.8, 121.7, 121.4, 121.2, 116.3, 115.2, 112.4, 102.8, 75.5, 65.2, 40.2, 38.8, 35.3, 29.0, 28.8, 28.0, 25.5, 18.9, 17.3. HRMS (ESI)  $m/z$  calculated for  $\text{C}_{39}\text{H}_{41}\text{N}_4\text{O}_4\text{S}^+[\text{M}+\text{H}]^+$  661.2843, found 661.2448.

**(3S,7aS,10S,10aR,11aS,11bR)-10a,11b-dimethyl-10-(5-methylhexyl)-2,3,4,6,6a,7,7a,8,9,10,10a,11,11a,11b-tetradecahydro-1H-cyclopenta[b]phenanthren-3-yl 5-benzyl-8-oxo-8-(quinolin-8-ylamino)octanoate (4d)**

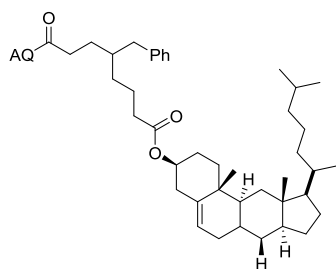

The title compound was isolated as a colorless oil (47% yield) after chromatography on silica with ethyl acetate:hexane (1:3).  $^1\text{H}$  NMR (400 MHz,  $\text{CDCl}_3$ )  $\delta$  9.70 (s, 1H), 8.71 (m, 2H), 8.09 (dd,  $J = 8.3, 1.6$  Hz, 1H), 7.47–7.36 (m, 3H), 7.19–7.16 (m, 2H), 7.16–7.04 (m, 3H), 5.28 (d,  $J = 4.3$  Hz, 1H), 4.52 (m, 1H), 2.58–2.46 (m, 3H), 2.26–2.15 (m, 4H), 1.90 (t,  $J = 18.5$  Hz, 2H), 1.82–1.69 (m, 6H), 1.68–1.58 (m, 2H), 1.54 (s, 2H), 1.51–1.34 (m, 8H), 1.33–1.24 (m, 5H), 1.23–1.13 (m, 3H), 1.03 (m, 7H), 0.92 (s, 3H), 0.84 (d,  $J = 6.5$  Hz, 4H), 0.79 (dd,  $J = 6.6, 1.7$  Hz, 6H), 0.60 (s, 3H);  $^{13}\text{C}$  NMR (101 MHz,  $\text{CDCl}_3$ )  $\delta$  172.9, 171.6, 148.1, 140.7, 139.7, 138.3, 136.3, 134.5, 129.1, 128.3, 127.9, 127.4, 125.8, 122.6, 121.5, 121.3, 116.4, 73.8, 56.7, 56.1, 50.0, 42.3, 40.3, 39.7, 39.5, 39.1, 38.1, 37.0, 36.5, 36.2, 35.7, 35.5, 34.8, 32.4, 31.9, 29.0, 28.2, 28.0, 27.8, 24.2, 23.8, 22.7, 22.5, 22.0, 21.0, 19.3, 18.7, 11.8. HRMS (ESI)  $m/z$  calculated for  $\text{C}_{50}\text{H}_{69}\text{N}_2\text{O}_3^+[\text{M}+\text{H}]^+$  745.5303, found 745.5303.

## 7. EPR Experiment

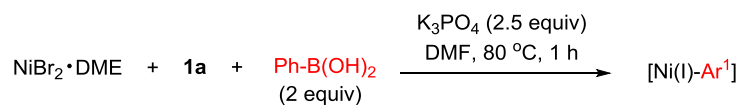

**Procedure:** To a 25 mL schlenk tube were added NiBr<sub>2</sub>•DME (0.03 mmol, 15 mol%), K<sub>3</sub>PO<sub>4</sub> (0.50 mmol, 2.5 eq), alkene substrate (0.20 mmol, 1.0 eq), phenylboronic acid (0.40 mmol, 2 eq), and DMF (1 mL). The resulting mixture was stirred for 1h at 80 °C. A small portion of this solution (300 μL) was taken into a capillary tube and sealed tight with wax for EPR experiment (Figure S1). The tube was sealed in the glovebox and immediately frozen in liquid nitrogen.

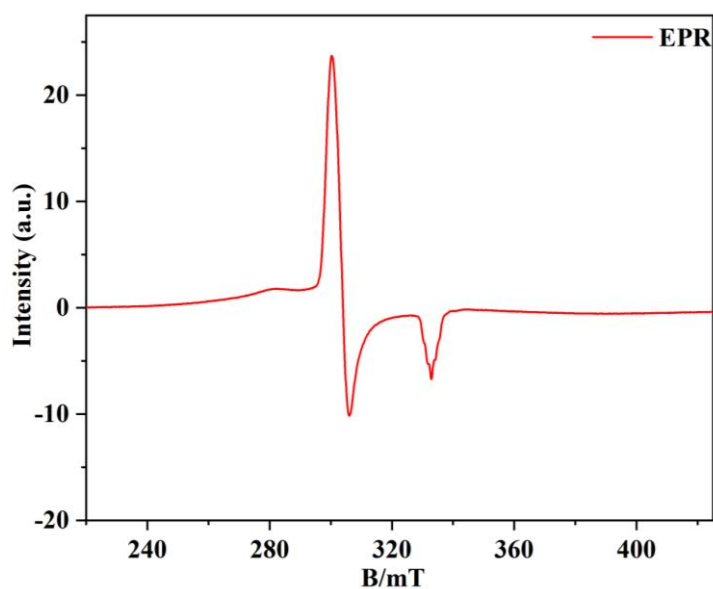

**Figure S1.** EPR Spectrum of complex Ni(I)-Ar<sup>1</sup>. Temperature = 95 K, solvent = DMF. Spectroscopic parameters:  $g = [2.00 \ 2.19 \ 2.22]$ . Microwave frequency = 9.3714 GHz, power = 0.4743 mW, modulation amplitude = 5.00 G

## 8. X-ray Crystallographic Data

Single crystals for X-ray studies were grown by slow evaporation of a solution of compound **2ao** in a mixture of petroleum ether and ethyl acetate at room temperature. X-Ray structural analysis of single crystal **2ao** was obtained to confirm the absolute configuration. The X-ray data of **2ao** is deposited in the Cambridge Crystallographic Data Centre with a number of CCDC 2129040.

Crystal Data for  $C_{29}H_{27}N_3O$  ( $M = 433.53$  g/mol): triclinic, space group P-1 (no. 2),  $a = 10.0837(10)$  Å,  $b = 11.1991(10)$  Å,  $c = 11.8993(11)$  Å,  $\alpha = 105.919(8)^\circ$ ,  $\beta = 108.497(9)^\circ$ ,  $\gamma = 96.764(8)^\circ$ ,  $V = 1194.2(2)$  Å<sup>3</sup>,  $Z = 2$ ,  $T = 293(2)$  K,  $\mu(\text{MoK}\alpha) = 0.074$  mm<sup>-1</sup>,  $D_{\text{calc}} = 1.206$  g/cm<sup>3</sup>, 8547 reflections measured ( $4.372^\circ \leq 2\theta \leq 50.012^\circ$ ), 4198 unique ( $R_{\text{int}} = 0.0257$ ,  $R_{\text{sigma}} = 0.0554$ ) which were used in all calculations. The final  $R_1$  was 0.0599 ( $I > 2\sigma(I)$ ) and  $wR_2$  was 0.1931 (all data).

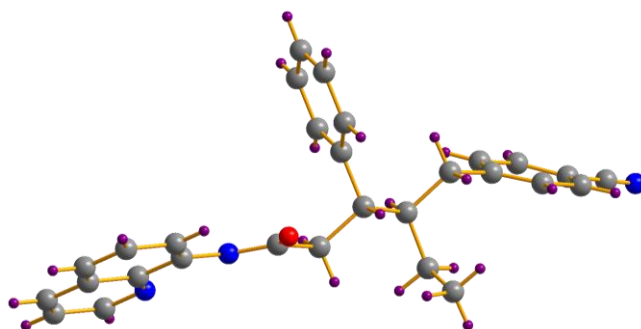

**Figure S2.** X-ray structure of compound **2ao** (CCDC 2129040).

**Table S5.** Crystal data and structure refinement for **2ao**.

|                     |                    |
|---------------------|--------------------|
| Identification code | A210509C           |
| Empirical formula   | $C_{29}H_{27}N_3O$ |
| Formula weight      | 433.53             |
| Temperature/K       | 293(2)             |
| Crystal system      | triclinic          |
| Space group         | P-1                |

|                                             |                                                                |
|---------------------------------------------|----------------------------------------------------------------|
| a/Å                                         | 10.0837(10)                                                    |
| b/Å                                         | 11.1991(10)                                                    |
| c/Å                                         | 11.8993(11)                                                    |
| $\alpha$ /°                                 | 105.919(8)                                                     |
| $\beta$ /°                                  | 108.497(9)                                                     |
| $\gamma$ /°                                 | 96.764(8)                                                      |
| Volume/Å <sup>3</sup>                       | 1194.2(2)                                                      |
| Z                                           | 2                                                              |
| $\rho_{\text{calc}}$ /cm <sup>3</sup>       | 1.206                                                          |
| $\mu$ /mm <sup>-1</sup>                     | 0.074                                                          |
| F(000)                                      | 460.0                                                          |
| Crystal size/mm <sup>3</sup>                | 0.25 × 0.22 × 0.18                                             |
| Radiation                                   | MoK $\alpha$ ( $\lambda$ = 0.71073)                            |
| 2 $\Theta$ range for data collection/°      | 4.372 to 50.012                                                |
| Index ranges                                | -11 ≤ h ≤ 11, -13 ≤ k ≤ 13, -12 ≤ l ≤ 14                       |
| Reflections collected                       | 8547                                                           |
| Independent reflections                     | 4198 [ $R_{\text{int}}$ = 0.0257, $R_{\text{sigma}}$ = 0.0554] |
| Data/restraints/parameters                  | 4198/21/300                                                    |
| Goodness-of-fit on F <sup>2</sup>           | 1.054                                                          |
| Final R indexes [ $I \geq 2\sigma(I)$ ]     | $R_1$ = 0.0599, $wR_2$ = 0.1564                                |
| Final R indexes [all data]                  | $R_1$ = 0.1113, $wR_2$ = 0.1931                                |
| Largest diff. peak/hole / e Å <sup>-3</sup> | 0.23/-0.18                                                     |

Single crystals for X-ray studies were grown by slow evaporation of a solution of compound **2as** in a mixture of petroleum ether and ethyl acetate at room temperature. X-Ray structural analysis of single crystal **2as** was obtained to confirm the absolute configuration. The X-ray data of **2as** is deposited in the Cambridge Crystallographic Data Centre with a number of CCDC 2129080.

Crystal Data for C<sub>29</sub>H<sub>26</sub>N<sub>3</sub>O (*M* = 432.53 g/mol): triclinic, space group P-1 (no. 2), *a* = 10.2156(16) Å, *b* = 10.6541(17) Å, *c* = 12.2607(19) Å,  $\alpha$  = 75.489(14)°,  $\beta$  = 86.653(13)°,  $\gamma$  = 68.487(15)°, *V* = 1201.0(4) Å<sup>3</sup>, *Z* = 2, *T* = 293(2) K,  $\mu(\text{MoK}\alpha)$  = 0.073 mm<sup>-1</sup>, *D*<sub>calc</sub> = 1.196 g/cm<sup>3</sup>, 8562 reflections measured (4.288° ≤ 2 $\theta$  ≤ 50.012°), 4226 unique (*R*<sub>int</sub> = 0.0648, *R*<sub>sigma</sub> = 0.1460) which were used in all calculations. The final *R*<sub>1</sub> was 0.0829 (*I* > 2 $\sigma$ (*I*)) and *wR*<sub>2</sub> was 0.2746 (all data).

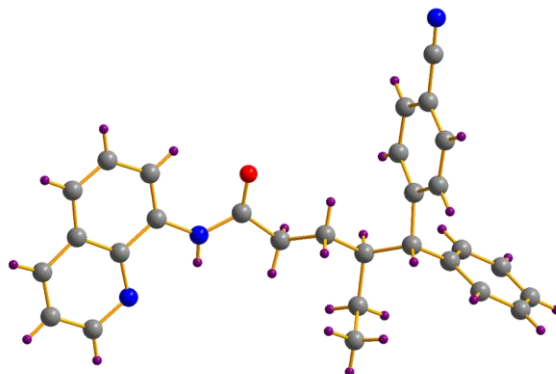

**Figure S3.** X-ray structure of compound **2as** (CCDC 2129080).

**Table S6.** Crystal data and structure refinement for **2ao**.

|                     |                                                  |
|---------------------|--------------------------------------------------|
| Identification code | A210509C                                         |
| Empirical formula   | C <sub>29</sub> H <sub>27</sub> N <sub>3</sub> O |
| Formula weight      | 433.53                                           |
| Temperature/K       | 293(2)                                           |
| Crystal system      | triclinic                                        |
| Space group         | P-1                                              |
| <i>a</i> /Å         | 10.0837(10)                                      |
| <i>b</i> /Å         | 11.1991(10)                                      |
| <i>c</i> /Å         | 11.8993(11)                                      |
| $\alpha$ /°         | 105.919(8)                                       |
| $\beta$ /°          | 108.497(9)                                       |
| $\gamma$ /°         | 96.764(8)                                        |

|                                             |                                                                  |
|---------------------------------------------|------------------------------------------------------------------|
| Volume/Å <sup>3</sup>                       | 1194.2(2)                                                        |
| Z                                           | 2                                                                |
| $\rho_{\text{calc}}/\text{g}/\text{cm}^3$   | 1.206                                                            |
| $\mu/\text{mm}^{-1}$                        | 0.074                                                            |
| F(000)                                      | 460.0                                                            |
| Crystal size/mm <sup>3</sup>                | 0.25 × 0.22 × 0.18                                               |
| Radiation                                   | MoK $\alpha$ ( $\lambda = 0.71073$ )                             |
| 2 $\Theta$ range for data collection/°      | 4.372 to 50.012                                                  |
| Index ranges                                | -11 ≤ h ≤ 11, -13 ≤ k ≤ 13, -12 ≤ l ≤ 14                         |
| Reflections collected                       | 8547                                                             |
| Independent reflections                     | 4198 [ $R_{\text{int}} = 0.0257$ , $R_{\text{sigma}} = 0.0554$ ] |
| Data/restraints/parameters                  | 4198/21/300                                                      |
| Goodness-of-fit on F <sup>2</sup>           | 1.054                                                            |
| Final R indexes [ $I \geq 2\sigma(I)$ ]     | $R_1 = 0.0599$ , $wR_2 = 0.1564$                                 |
| Final R indexes [all data]                  | $R_1 = 0.1113$ , $wR_2 = 0.1931$                                 |
| Largest diff. peak/hole / e Å <sup>-3</sup> | 0.23/-0.18                                                       |

## 9. Kinetic Studies

### Reaction set up & analysis (Standard condition)

In an argon-filled glovebox, NiBr<sub>2</sub>•DME (0.03 mmol, 15 mol%), N-(quinolin-8-yl)pent-4-enamide (**1a**) (0.20 mmol, 1 eq), phenylboronic acid (0.40 mmol, 2 eq), dimethyl terephthalate (0.05 mmol, 25 mol%) as internal standard, n-butyl iodide (0.4 mmol, 2 eq), MeOH (3 mmol, 15 eq) and DMF (1 mL), were added to a 12 mL tube. The test tube was sealed with a PTFE/silicon septa cap. The reaction mixture was stirred at 80 °C. 2.0 μL of the reaction mixture was taken out at 30, 50, 70, 90, 110, 130, 150, 170, 190, 210 minutes and quenched with 0.6 mL ethyl acetate immediately. The yield was monitored by GC-MS.<sup>[5]</sup>

**Table S7. Experimental data of standard condition.**

| Time | Yield of <b>2a</b> | Time | Yield of <b>2a</b> |
|------|--------------------|------|--------------------|
| 3    | 6.1%               | 25   | 50.7%              |
| 6    | 15.1%              | 30   | 56.1%              |
| 9    | 19.9%              | 35   | 61.1%              |
| 12   | 25.4%              | 45   | 67.8%              |
| 15   | 30.4%              | 60   | 72.9%              |
| 18   | 33.4%              | 120  | 78.0%              |
| 21   | 41.5%              |      |                    |



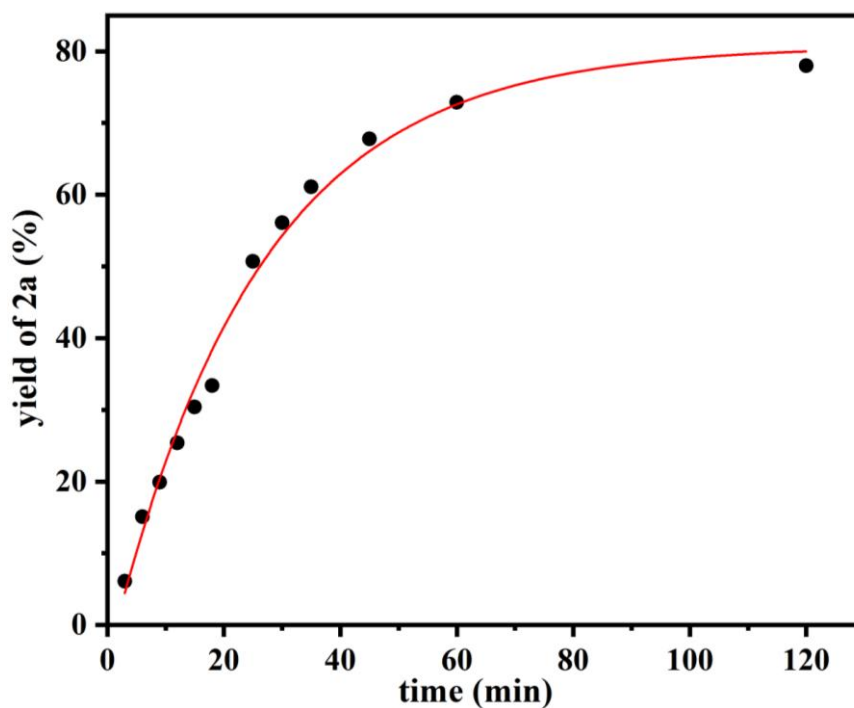

**Figure S4.** Plot of the formation of product **2a** from the reaction of **1a** (0.20 mmol), phenylboronic acid (0.40 mmol) and <sup>t</sup>BuI (0.40 mmol) in 1 mL dry DMF at different time intervals at 80 °C.

**Table S8.** The molar concentration ( $\times 10^{-3}$  M) of product **2a** in different concentrations of NiBr<sub>2</sub>•DME at different time.

|            | [Ni] 7.5 mol%<br>(0.015 M)   | [Ni] 15 mol%<br>(0.030 M)    | [Ni] 30 mol%<br>(0.045 M)    | [Ni] 60 mol%<br>(0.060 M)    |
|------------|------------------------------|------------------------------|------------------------------|------------------------------|
| Time (min) | [ <b>2a</b> ] ( $10^{-3}$ M) |
| 3          | 1.231                        | 1.606                        | 2.231                        | 2.849                        |
| 6          | 1.925                        | 2.746                        | 3.768                        | 4.773                        |
| 9          | 2.423                        | 3.970                        | 5.287                        | 6.616                        |
| 12         | 3.532                        | 4.891                        | 6.821                        | 8.730                        |
| 15         | 3.860                        | 6.086                        | 8.270                        | 10.650                       |
| 18         | 4.622                        | 6.995                        | 9.895                        | 12.450                       |

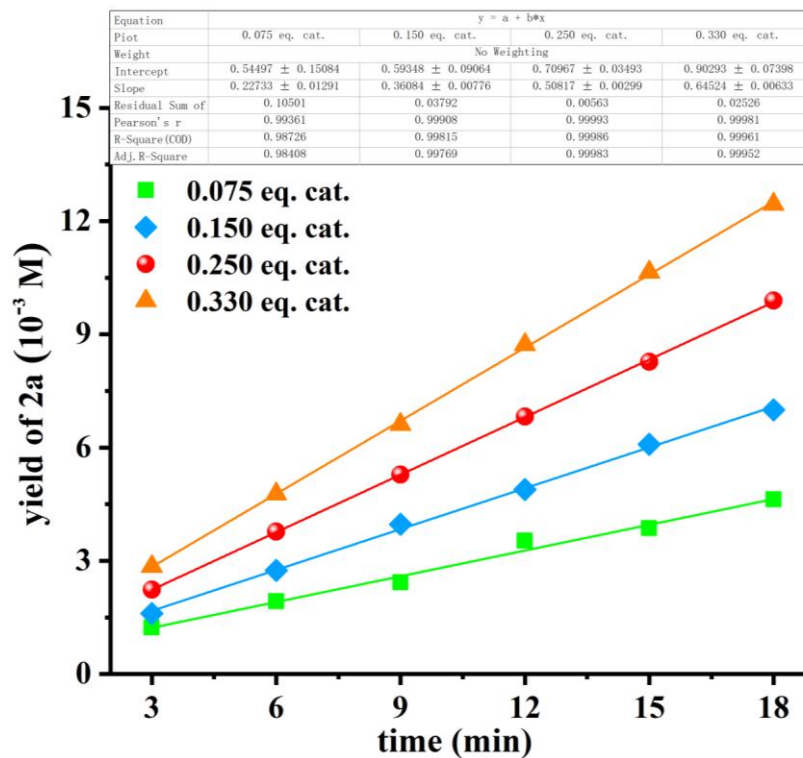

**Figure S5.** Plot of the formation of product **2a** from the reaction of **1a** (0.2 mmol), phenylboronic acid (0.40 mmol); 1-iodobutane (0.40 mmol); with 0.015 M, 0.030 M, 0.045 M, 0.060 M NiBr<sub>2</sub>•DME at different time at 80 °C.

**Table S9.** The  $K_{in}$  value of product **2a** in different concentrations of NiBr<sub>2</sub>•DME.

| [Ni] (M) | $K_{in}$ (M min <sup>-1</sup> ) |
|----------|---------------------------------|
| 0.015    | $0.2273 \times 10^{-3}$         |
| 0.030    | $0.3608 \times 10^{-3}$         |
| 0.050    | $0.5082 \times 10^{-3}$         |
| 0.066    | $0.6452 \times 10^{-3}$         |

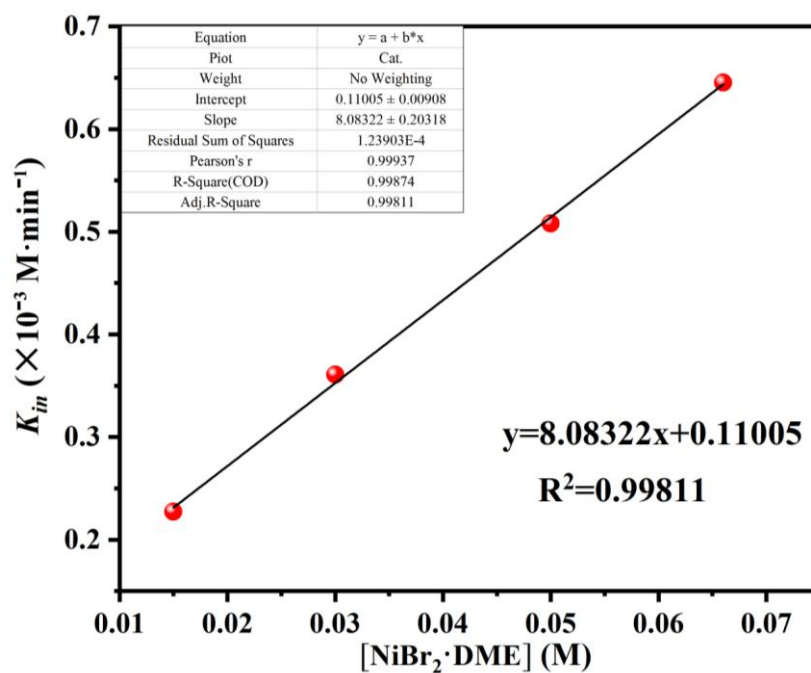

**Figure S6.** Plot of  $K_{in}$  versus of  $\text{NiBr}_2 \cdot \text{DME}$  from the reaction of **1a** (0.20 mmol), phenylboronic acid (0.40 mmol); 1-iodobutane (0.40 mmol); with 0.015 M, 0.030 M, 0.045 M, 0.060 M  $\text{NiBr}_2 \cdot \text{DME}$ .

**Table S10.** The molar concentration ( $\times 10^{-3}$  M) of product **2a** in different concentrations of **1a** at different time.

|            | [ <b>1a</b> ] 0.5 mmol<br>(0.05 M) | [ <b>1a</b> ] 1.0 mmol<br>(0.10 M) | [ <b>1a</b> ] 2.0mmol<br>(0.20 M) | [ <b>1a</b> ] 4.0 mmol<br>(0.40 M) |
|------------|------------------------------------|------------------------------------|-----------------------------------|------------------------------------|
| Time (min) | [ <b>2a</b> ] ( $10^{-3}$ M)       | [ <b>2a</b> ] ( $10^{-3}$ M)       | [ <b>2a</b> ] ( $10^{-3}$ M)      | [ <b>2a</b> ] ( $10^{-3}$ M)       |
| 3          | 3.159                              | 2.296                              | 1.210                             | 1.156                              |
| 6          | 4.439                              | 4.811                              | 3.026                             | 2.211                              |
| 9          | 4.482                              | 6.610                              | 3.970                             | 3.456                              |
| 12         | 4.657                              | 7.361                              | 5.074                             | 4.020                              |
| 15         | 4.573                              | 8.139                              | 6.086                             | 5.848                              |
| 18         | 4.532                              | 8.706                              | 6.674                             | 6.708                              |
| 21         | 4.512                              | 8.820                              | 8.296                             | 7.760                              |
| 25         | 4.519                              | 8.930                              | 10.132                            | 9.100                              |

|    |       |       |        |        |
|----|-------|-------|--------|--------|
| 30 | 4.523 | 9.090 | 11.212 | 10.468 |
|----|-------|-------|--------|--------|

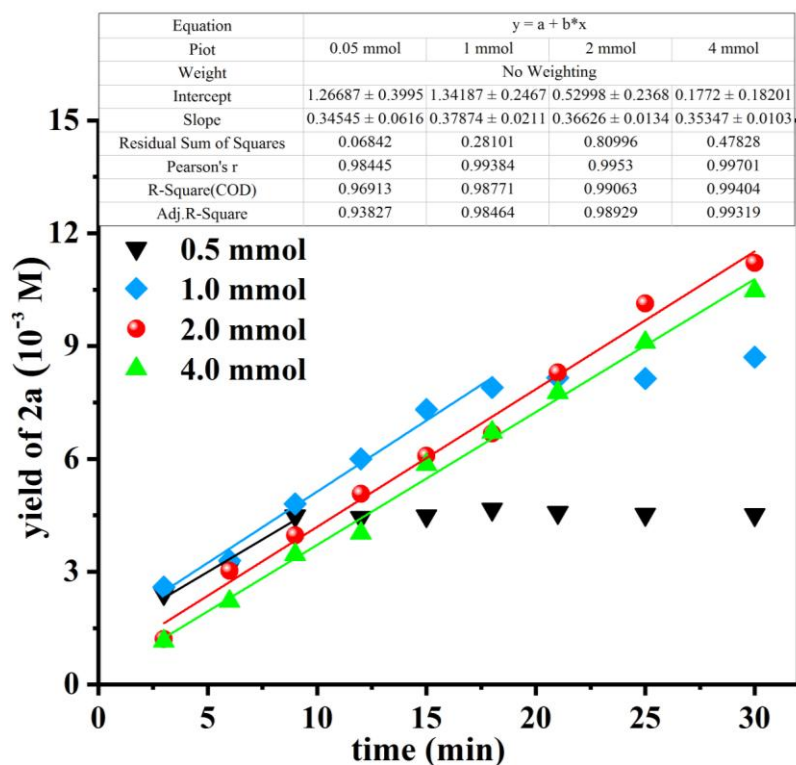

**Figure S7.** Plot of the formation of product **2a** from the reaction of phenylboronic acid (0.40 mmol), 1-iodobutane (0.40 mmol), with 0.05 M, 0.10 M, 0.20 M, 0.40 M and 0.80 M of **1a** at different time at 80 °C.

**Table S11.** The  $K_{in}$  value of product **2a** in different concentrations of **1a**.

| [ <b>1a</b> ] (M) | $K_{in}$ (M min <sup>-1</sup> ) |
|-------------------|---------------------------------|
| 0.050             | $0.3455 \times 10^{-3}$         |
| 0.10              | $0.3787 \times 10^{-3}$         |
| 0.20              | $0.3663 \times 10^{-3}$         |
| 0.40              | $0.3535 \times 10^{-3}$         |

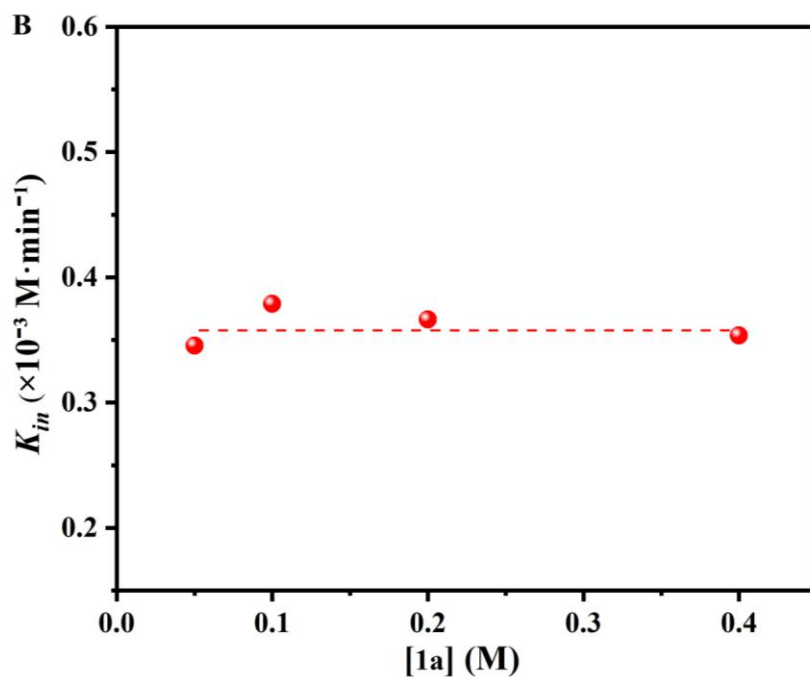

**Figure S8.** Plot of  $K_{in}$  versus of **1a** from the reaction of phenylboronic acid (0.40 mmol), 1-iodobutane (0.40 mmol), with 0.05 M, 0.10 M, 0.20 M, 0.40 M and 0.80 M of **1a**.

**Table S12.** The molar concentration ( $\times 10^{-3}$  M) of product **2a** in different concentrations of phenylboronic acid at different time.

|            | PhB(OH) <sub>2</sub><br>0.25 eq<br>(0.05 M) | PhB(OH) <sub>2</sub><br>0.5 eq<br>(0.10 M) | PhB(OH) <sub>2</sub><br>1.0 eq<br>(0.20 M) | PhB(OH) <sub>2</sub><br>2.0 eq<br>(0.40 M) | PhB(OH) <sub>2</sub><br>4.0 eq<br>(0.80 M) |
|------------|---------------------------------------------|--------------------------------------------|--------------------------------------------|--------------------------------------------|--------------------------------------------|
| Time (min) | [2a]<br>( $10^{-3}$ M)                      | [2a]<br>( $10^{-3}$ M)                     | [2a]<br>( $10^{-3}$ M)                     | [2a]<br>( $10^{-3}$ M)                     | [2a]<br>( $10^{-3}$ M)                     |
| 3          | 0.690                                       | 1.064                                      | 3.708                                      | 1.210                                      | 0.906                                      |
| 6          | 1.804                                       | 2.086                                      | 5.328                                      | 3.026                                      | 1.046                                      |
| 9          | 2.600                                       | 3.136                                      | 6.825                                      | 3.970                                      | 1.232                                      |
| 12         | 3.010                                       | 4.592                                      | 8.193                                      | 5.074                                      | 1.414                                      |
| 15         | 3.372                                       | 5.488                                      | 9.625                                      | 6.086                                      | 2.064                                      |
| 18         | 3.668                                       | 5.901                                      | 11.302                                     | 6.674                                      | 2.264                                      |
| 21         | 3.894                                       | 6.676                                      | 12.510                                     | 8.296                                      | 2.420                                      |

|    |       |       |        |        |       |
|----|-------|-------|--------|--------|-------|
| 25 | 4.266 | 7.316 | 14.162 | 10.132 | 2.968 |
| 30 | 4.768 | 8.362 | 16.210 | 11.212 | 3.336 |

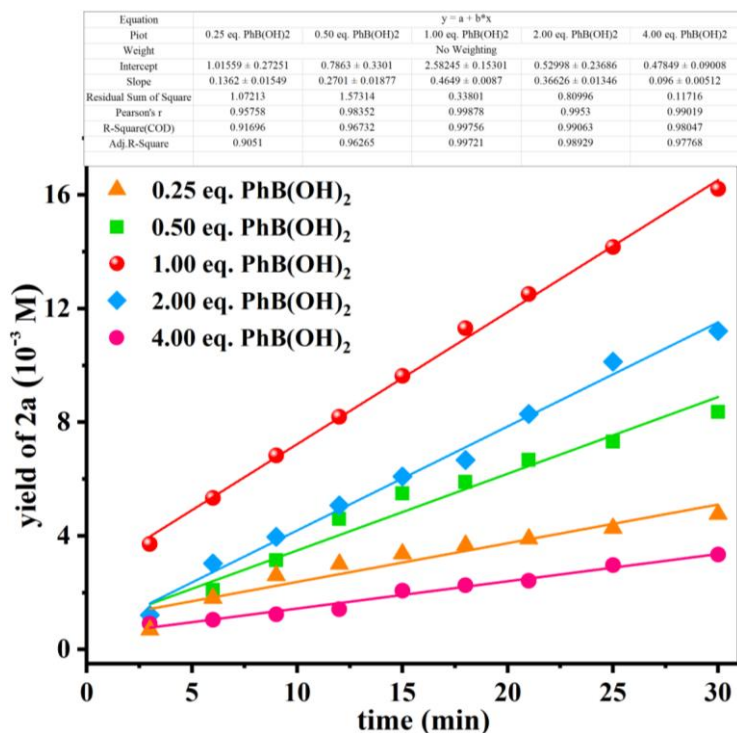

**Figure S9.** Plot of the formation of product **2a** from the reaction of **1a** (0.2 mmol), 1-iodobutane (0.40 mmol) with 0.05 M, 0.10 M, 0.20 M, 0.40 M and 0.80 M of phenylboronic acid at different time at 80 °C.

**Table S13.** The  $K_{in}$  value of product **2a** in different concentrations of phenylboronic acid.

| PhB(OH) <sub>2</sub> (M) | $K_{in}$ (M min <sup>-1</sup> ) |
|--------------------------|---------------------------------|
| 0.050                    | $0.1362 \times 10^{-3}$         |
| 0.10                     | $0.2701 \times 10^{-3}$         |
| 0.20                     | $0.4649 \times 10^{-3}$         |
| 0.40                     | $0.3663 \times 10^{-3}$         |
| 0.80                     | $0.0960 \times 10^{-3}$         |

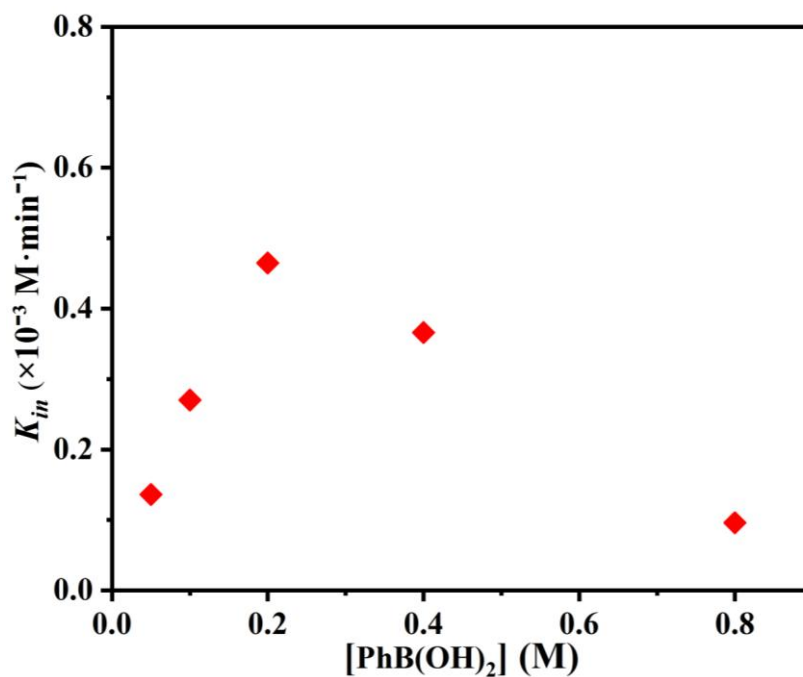

**Figure S10.** Plot of  $K_{in}$  versus phenylboronic acid from the reaction of **1a** (0.2 mmol), iodobutane (0.4 mmol) with 0.05 M, 0.10 M, 0.20 M, 0.40 M and 0.80 M of phenylboronic acid.

**Table S14.** The molar concentration ( $\times 10^{-3}$  M) of product **2a** in different concentrations of 1-iodobutane at different time.

|            | <sup>n</sup> BuI 1.0 eq<br>(0.2 M) | <sup>n</sup> BuI 2.0 eq<br>(0.4 M) | <sup>n</sup> BuI 3.0 eq<br>(0.6 M) | <sup>n</sup> BuI 4.0 eq<br>(0.8 M) |
|------------|------------------------------------|------------------------------------|------------------------------------|------------------------------------|
| Time (min) | [ <b>2a</b> ] ( $10^{-3}$ M)       |
| 3          | 0.280                              | 1.210                              | 1.350                              | 1.586                              |
| 6          | 1.244                              | 3.026                              | 3.100                              | 3.726                              |
| 9          | 2.250                              | 3.970                              | 4.452                              | 5.250                              |
| 12         | 3.130                              | 5.074                              | 5.628                              | 6.460                              |
| 15         | 4.080                              | 6.086                              | 7.120                              | 8.580                              |
| 18         | 5.128                              | 6.674                              | 8.480                              | 9.962                              |
| 21         | 5.880                              | 8.296                              | 9.520                              | 11.890                             |
| 25         | 7.314                              | 10.132                             | 11.200                             | 12.870                             |
| 30         | 8.650                              | 11.212                             | 12.012                             | 13.924                             |

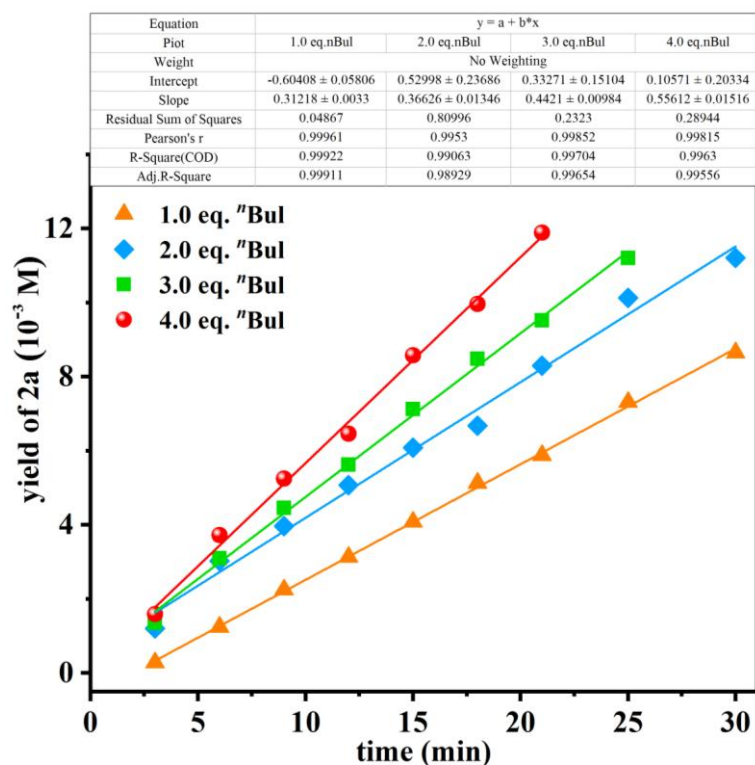

**Figure S11.** Plot of the formation of product **2a** from the reaction of **1a** (0.20 mmol), phenylboronic acid (0.40 mmol) with 0.20 M, 0.40 M, 0.60 M and 0.80 M of 1-iodobutane at different time at 80 °C.

**Table S15.** The  $K_{in}$  value of product **2a** in different concentrations of 1-iodobutane.

| [ <sup>n</sup> BuI] (M) | $K_{in}$ (M min <sup>-1</sup> ) |
|-------------------------|---------------------------------|
| 0.20                    | $0.3121 \times 10^{-3}$         |
| 0.40                    | $0.3662 \times 10^{-3}$         |
| 0.60                    | $0.4421 \times 10^{-3}$         |
| 0.80                    | $0.5561 \times 10^{-3}$         |



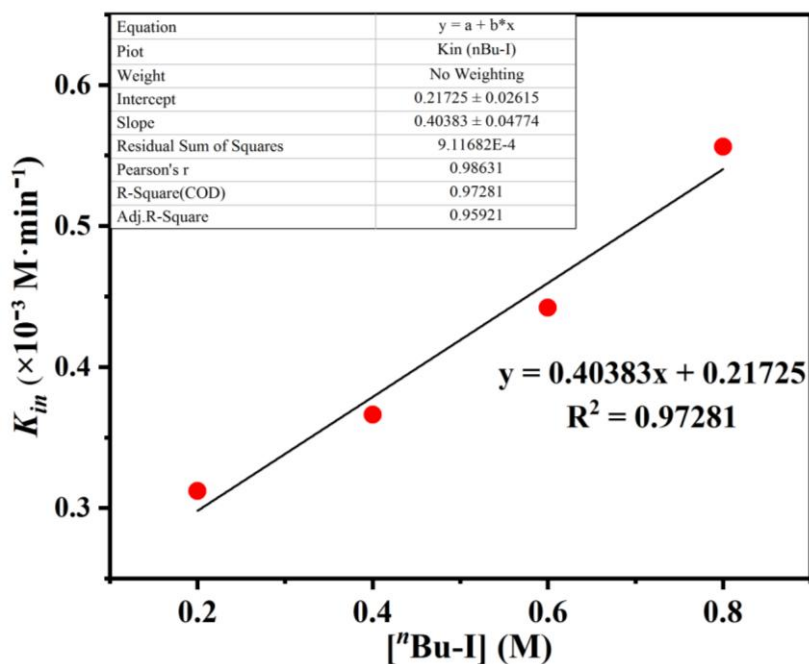

**Figure S12.** Plot of  $K_{in}$  versus  $[nBu-I]$  from the reaction of **1a** (0.2 mmol), phenylboronic acid (0.4mmol) with 0.20 M, 0.40 M, 0.60 M and 0.8 M of 1-iodobutane.

## 10. DFT Calculations

All the DFT calculations were performed by the Gaussian 16 package.<sup>[6,7]</sup> Molecular structures were optimized under (U)M06<sup>[8]</sup> hybrid functional with all-electron base set def2-SVP. A self-consistent response field (SCRF) model in the SMD solvation model<sup>[9]</sup> was used to consider the solvent effect of DMF, and the solvent entropy correction<sup>[10]</sup> was carried out. And the all-electron basis set def2-TZVP was used for single point correction. The Gibbs free energy of all the structures was conducted in solution at 373.15 K and at 1atm. The frequency analysis was performed to ensure that the optimized structure was the minimum energy point. Combined with the intrinsic reaction coordinate (IRC) calculation,<sup>[11]</sup> each transition state was determined to connect the intermediates. The non-covalent interaction was reached by NCI

analysis<sup>[12]</sup> using Multiwfn program<sup>[13]</sup> and plotted by VMD.<sup>[14]</sup> The 3D structures of the transition states and intermediates were drawn by CYLview software.<sup>[15]</sup>

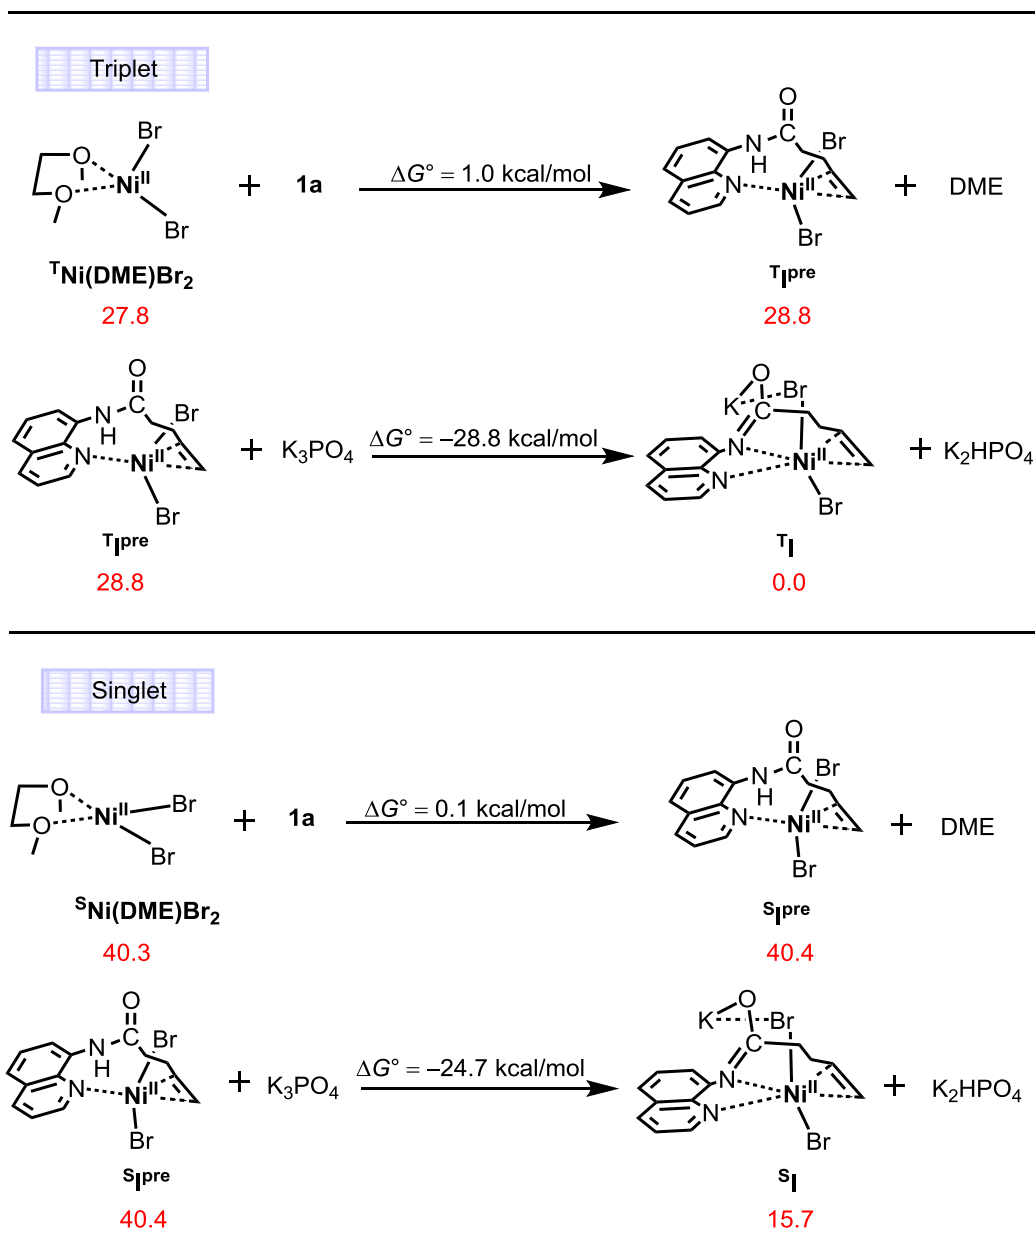

**Figure S13.** The relative stability of Ni(II) complexes.

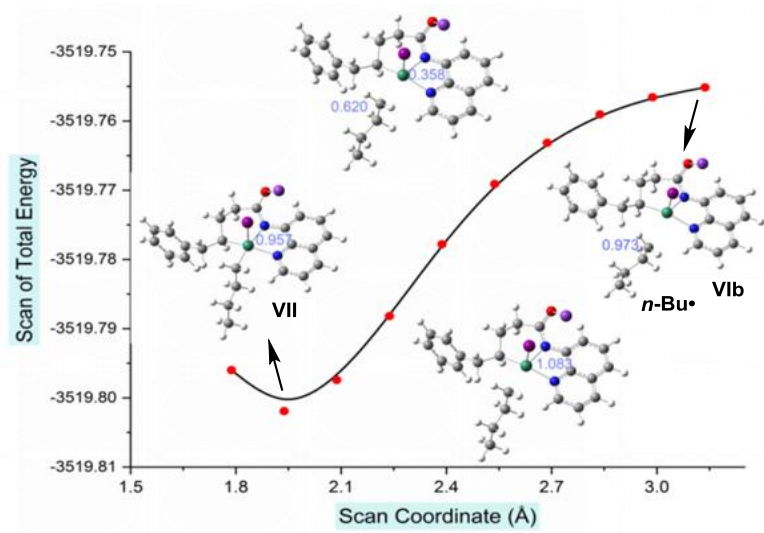

**Figure S14.** The barrier-free radical addition of  $n\text{-Bu}^\bullet$  to **VIb**.

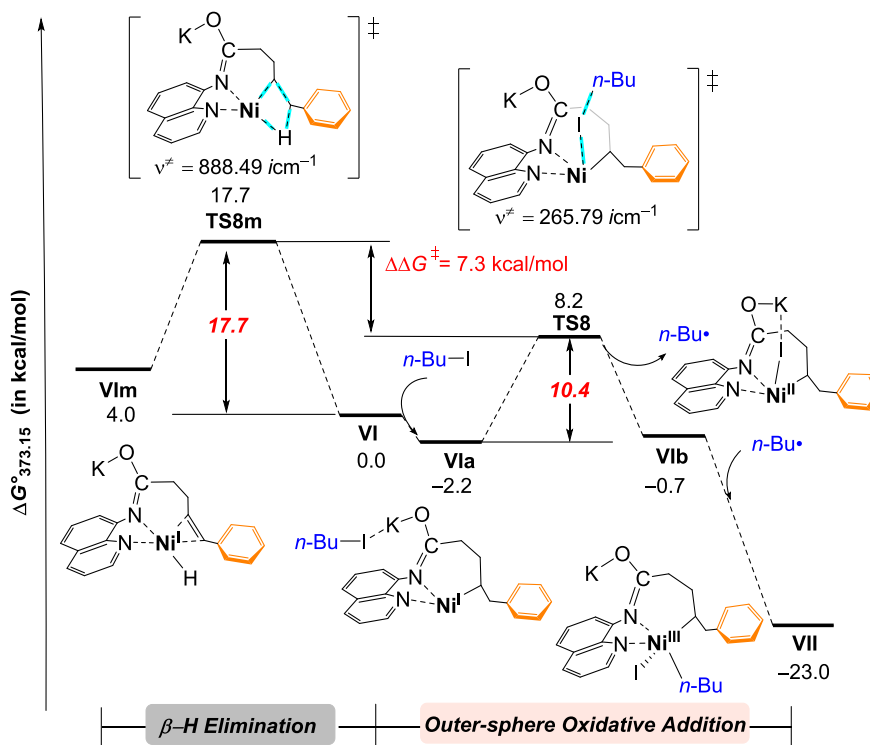

**Figure S15.** Two possible competing paths from intermediate **VI**.

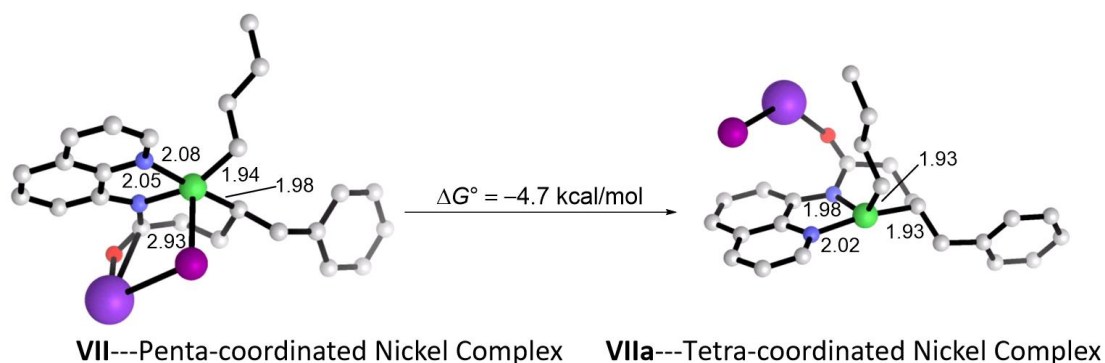

**Figure S16.** Two different coordination forms of trivalent nickel intermediates.

Nickel(III) complexes prefer a tetra-coordinated structure and thus a penta-coordinated **VII** is a thermodynamically unfavorable configuration. We also tried to find the reductive elimination transition state of **VII**. Unfortunately, iodine anion tends to be far away from the nickel center and interact with K cation, eventually forming the tetra-coordinated nickel(III) complex **VIIa**.

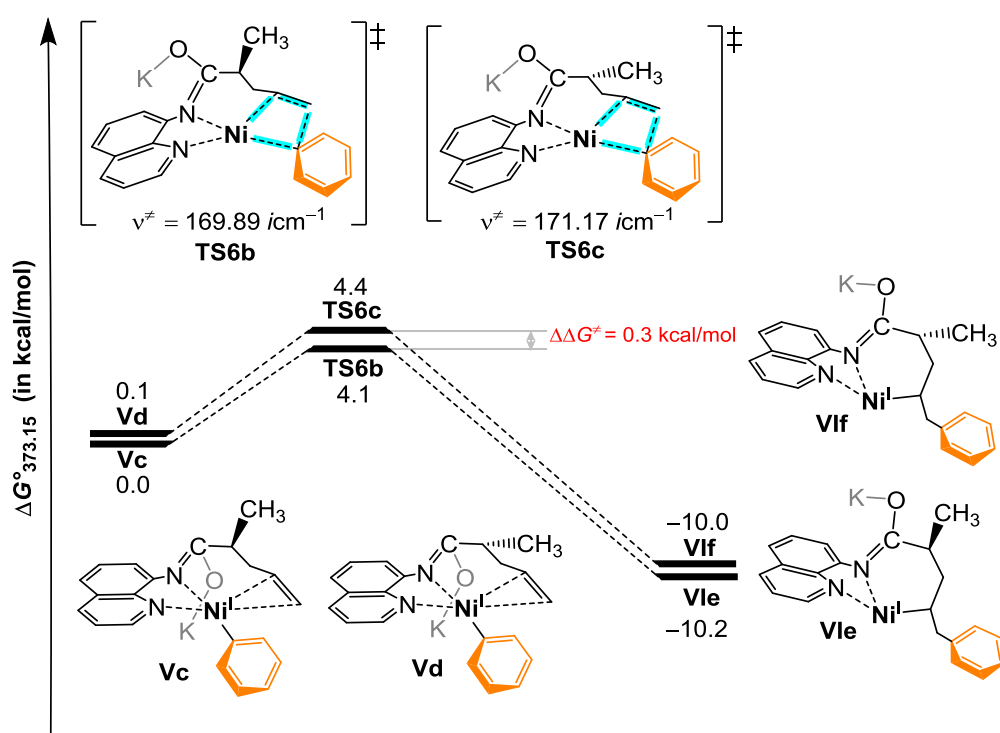

**Figure S17.** Migration insertion of the different methyl  $\alpha$ -substitution intermediates **Vc** and **Vd**.

## 11. References

- [1] F.-P. Wu, X.-F. Wu, *Chem. Sci.* **2021**, *12*, 10341-10346.
- [2] M.-Y. Liu, P.-S. Yang, M. K. Karunananda, Y.-Y. Wang, P. Liu, K. M. Engle, *J. Am. Chem. Soc.* **2018**, *140*, 5805-5813.
- [3] T. Yang, Y. Jiang, Y.-X. Luo, J. J. H. Lim, Y. Lan, M. J. Koh, *J. Am. Chem. Soc.* **2020**, *142*, 21410-21419.
- [4] Z.-G. Zhang, X. Li, M.-M. Song, Y.-M. Wan, D. Zheng, G.-S. Zhang, G. Chen, *J. Org. Chem.* **2019**, *84*, 12792-12799.
- [5] T. Yang, X.-X. Chen, W.-D. Rao, M. J. Koh, *Chem.* **2020**, *6*, 738-751.
- [6] M. J. Frisch, G. W. Trucks, H. B. Schlegel, G. E. Scuseria, M. A. Robb, J. R. Cheeseman, G. Scalmani, V. Barone, G. A. Petersson, H. Nakatsuji, X. Li, M. Caricato, A. V. Marenich, J. Bloino, B. G. Janesko, R. Gomperts, B. Mennucci, H. P. Hratchian, J. V. Ortiz, A. F. Izmaylov, J. L. Sonnenberg, D. Williams-Young, F. Ding, F. Lipparini, F. Egidi, J. Goings, B. Peng, A. Petrone, T. Henderson, D. Ranasinghe, V. G. Zakrzewski, J. Gao, N. Rega, G. Zheng, W. Liang, M. Hada, M. Ehara, K. Toyota, R. Fukuda, J. Hasegawa, M. Ishida, T. Nakajima, Y. Honda, O. Kitao, H. Nakai, T. Vreven, K. Throssell, J. A. Jr. Montgomery, J. E. Peralta, F. Ogliaro, M. J. Bearpark, J. J. Heyd, E. N. Brothers, K. N. Kudin, V. N. Staroverov, T. A. Keith, R. Kobayashi, J. Normand, K. Raghavachari, A. P. Rendell, J. C. Burant, S. S. Iyengar, J. Tomasi, M. Cossi, J. M. Millam, M. Klene, C. Adamo, R. Cammi, J. W. Ochterski, R. L. Martin, K. Morokuma, O. Farkas, J. B. Foresman, D. J. Fox, Gaussian 16, Revision C.01, Gaussian, Inc., Wallingford CT, **2016**.
- [7] R. Dennington, T. A. Keith, J. M. Millam, GaussView, Version 6, Semichem Inc., Shawnee Mission, KS, **2016**.
- [8] Y. Zhao, D. G. Truhlar, *Theor. Chem. Account* **2008**, *120*, 215-241.
- [9] A. V. Marenich, C. J. Cramer, D. G. Truhlar, *J. Phys. Chem. B* **2009**, *113*, 6378-6396.
- [10] M. Mammen, E. I. Shakhnovich, J. M. Deutch, G. M. Whitesides, *J. Org. Chem.* **1998**, *63*, 12, 3821-3830.
- [11] K. Fukui, *Frontier Orbitals and Reaction Paths: Selected Papers of Kenichi Fukui*. Frontier Orbitals and Reaction Paths: Selected Papers of Kenichi Fukui, **1997**.
- [12] E. R. Johnson, S. Keinan, P. Mori-Sanchez, J. Contreras-García, A. J. Cohen, W.T. Yang, *J. Am. Chem. Soc.* **2010**, *132*, 6498-6506.
- [13] T. Lu, F.-W. Chen, *J. Comput. Chem.* **2012**, *33*, 580-592.
- [14] W. Humphrey, A. Dalke, K. Schulten. *J. Mol Graph* **1996**, *14*, 33-38.
- [15] C. Y. Legault, CYLview, 1.0 b. Université de Sherbrooke **2009**.

## 12. Cartesian Coordinates of Optimized Structures

### 1a

Gibbs free energy before correction = -725.47113800

Gibbs free energy after correction = -725.45667162

|   |             |             |             |
|---|-------------|-------------|-------------|
| C | -1.69942100 | 0.60887200  | -0.12054500 |
| O | -1.87217500 | 1.81465600  | -0.09627300 |
| N | -0.46465400 | 0.01478700  | -0.07615700 |
| H | -0.41779500 | -1.00670100 | -0.10043500 |
| C | -2.83237100 | -0.38679500 | -0.21364000 |
| C | -4.20650200 | 0.25421700  | -0.12610900 |
| H | -2.70113800 | -1.14869400 | 0.57745300  |
| H | -2.71832900 | -0.93859000 | -1.16701600 |
| H | -4.31709200 | 0.78594900  | 0.83599600  |
| H | -4.28310000 | 1.02579900  | -0.91513200 |
| C | -5.30191600 | -0.74843300 | -0.28990400 |
| H | -5.28801000 | -1.32447900 | -1.22890800 |
| C | -6.25906000 | -0.99377200 | 0.60665700  |
| H | -6.30364800 | -0.44477500 | 1.55737200  |
| H | -7.03716800 | -1.74562400 | 0.43036800  |
| C | 2.63999100  | -2.47621500 | -0.02447000 |
| C | 1.90082200  | -0.30112900 | 0.00145500  |
| C | 3.22681300  | 0.21276500  | 0.06143300  |
| C | 4.28252700  | -0.73224000 | 0.07629400  |
| C | 3.99529200  | -2.07542700 | 0.03361500  |
| H | 2.39422200  | -3.54676500 | -0.05928200 |
| C | 0.78958600  | 0.61022700  | -0.01655900 |
| C | 3.43949900  | 1.61400200  | 0.10309600  |
| H | 5.31651900  | -0.37200400 | 0.12201400  |
| H | 4.78720900  | -2.82974100 | 0.04358900  |
| C | 2.35711700  | 2.46209600  | 0.08486600  |
| C | 1.03179600  | 1.97346400  | 0.02545800  |
| H | 4.46529700  | 1.99510200  | 0.14939600  |
| H | 2.51193200  | 3.54575600  | 0.11683000  |
| H | 0.18680700  | 2.66287300  | 0.01217000  |
| N | 1.63560600  | -1.62980600 | -0.04014500 |

### K<sub>3</sub>PO<sub>4</sub>

Gibbs free energy before correction = -2441.64779000

Gibbs free energy after correction = -2441.63332405

|   |             |             |             |
|---|-------------|-------------|-------------|
| O | 0.89017900  | -0.00231900 | -1.25097700 |
| O | -0.95700900 | -1.29076700 | 0.00322400  |
| O | 0.88896100  | 0.00194600  | 1.25511000  |
| P | -0.06258600 | 0.00019700  | 0.00176600  |
| O | -0.95609300 | 1.29180300  | -0.00156300 |
| K | 1.62198000  | 2.25389600  | -0.00120100 |
| K | 1.62032700  | -2.25495200 | -0.00135700 |
| K | -3.13649300 | 0.00062100  | -0.00127500 |

### 1a'

Gibbs free energy before correction = -1324.76701600

Gibbs free energy after correction = -1324.75254997

|   |             |             |             |
|---|-------------|-------------|-------------|
| C | -2.93371900 | -1.03917600 | 0.38354900  |
| C | -3.52659300 | 0.19813000  | -0.29074800 |
| H | -3.16820900 | -1.03218300 | 1.46200700  |
| H | -3.38227900 | -1.94827700 | -0.05949600 |
| H | -3.03275600 | 1.10499200  | 0.10920500  |
| H | -3.27410300 | 0.14979800  | -1.36753000 |
| C | -5.00580700 | 0.30066200  | -0.12098800 |
| H | -5.58955000 | -0.55657900 | -0.49369700 |
| C | -5.64761300 | 1.32069100  | 0.45254000  |
| H | -5.10027700 | 2.19007000  | 0.84253400  |
| H | -6.73915600 | 1.33455300  | 0.55462900  |
| C | 0.83441300  | 2.67026100  | -0.26020100 |
| C | 1.20363500  | 0.55581400  | 0.57404000  |
| C | 2.61991500  | 0.69535100  | 0.42244000  |
| C | 3.10410100  | 1.92148700  | -0.10576800 |
| C | 2.21804300  | 2.91141400  | -0.44855000 |
| H | 0.11384800  | 3.45635500  | -0.52972100 |
| C | 0.65389400  | -0.68356300 | 1.08380900  |
| C | 3.48716000  | -0.37308500 | 0.76850800  |
| H | 4.18508400  | 2.05360500  | -0.23162900 |
| H | 2.55717100  | 3.86728300  | -0.85835600 |
| C | 2.95111500  | -1.54363600 | 1.26332900  |
| C | 1.55685400  | -1.69401600 | 1.41857600  |
| H | 4.56729900  | -0.24595200 | 0.63694800  |
| H | 3.61013300  | -2.37610800 | 1.53390700  |
| H | 1.14721600  | -2.63415800 | 1.80569800  |
| N | 0.34659700  | 1.55219600  | 0.22244500  |
| N | -0.69985600 | -0.83786300 | 1.24770600  |
| C | -1.43390600 | -1.06923100 | 0.17718900  |
| O | -1.00996300 | -1.27691000 | -0.99558500 |

K 1.27206000 -1.32500300 -1.98090700

### **K<sub>2</sub>HPO<sub>4</sub>**

Gibbs free energy before correction = -1842.35072200

Gibbs free energy after correction = -1842.33625572

|   |             |             |             |
|---|-------------|-------------|-------------|
| O | 1.29418700  | 0.96605500  | 0.90857100  |
| O | 0.01351000  | -0.52067000 | -0.70365800 |
| P | -0.00187000 | 0.81433500  | 0.10967300  |
| O | -1.33829200 | 0.98047700  | 0.84937500  |
| K | -2.37527900 | -1.15628900 | -0.01503500 |
| K | 2.42914700  | -1.07822300 | -0.03687000 |
| O | 0.01674500  | 2.05459800  | -1.00610700 |
| H | -0.88462400 | 2.39701400  | -1.04434100 |

### **DME**

Gibbs free energy before correction = -308.34613200

Gibbs free energy after correction = -308.33166569

|   |             |             |             |
|---|-------------|-------------|-------------|
| C | -2.72923000 | -0.41887700 | -0.05619700 |
| H | -2.82347300 | -0.55789700 | -1.15411900 |
| H | -3.21130300 | -1.27566800 | 0.44082000  |
| C | 2.72923000  | -0.41887600 | 0.05619700  |
| H | 3.29510800  | 0.49919800  | -0.21062800 |
| H | 3.21130300  | -1.27566700 | -0.44082100 |
| O | 1.39953500  | -0.35440900 | -0.35332100 |
| O | -1.39953500 | -0.35440900 | 0.35332100  |
| C | -0.71652000 | 0.72127100  | -0.22211500 |
| H | -1.18510200 | 1.68858000  | 0.06572700  |
| H | -0.75725500 | 0.66669200  | -1.33330300 |
| C | 0.71652000  | 0.72127100  | 0.22211500  |
| H | 0.75725600  | 0.66669200  | 1.33330300  |
| H | 1.18510200  | 1.68858000  | -0.06572700 |
| H | -3.29510800 | 0.49919800  | 0.21062800  |
| H | 2.82347300  | -0.55789700 | 1.15411900  |

### **<sup>T</sup>Ni(DME)Br<sub>2</sub>**

Gibbs free energy before correction = -6964.08487700

Gibbs free energy after correction = -6964.07041085

|    |             |             |             |
|----|-------------|-------------|-------------|
| Ni | 0.18044100  | -0.24542000 | -0.06782000 |
| Br | -1.81363700 | -1.46351500 | -0.07981900 |
| C  | -0.75744800 | 0.74337600  | 2.61315500  |
| H  | -0.22906500 | -0.15482300 | 2.96592700  |
| H  | -0.65490900 | 1.54534300  | 3.36424500  |



|    |             |             |             |
|----|-------------|-------------|-------------|
| C  | -1.26236400 | 1.37385900  | -2.19125500 |
| H  | -1.14096200 | 2.19733600  | -2.91508700 |
| H  | -2.21474400 | 1.49840800  | -1.64658600 |
| O  | -0.14712400 | 1.35422500  | -1.30645800 |
| O  | -0.15279700 | 1.14613700  | 1.39487400  |
| C  | -0.73062800 | 2.30938000  | 0.81079000  |
| H  | -0.59784700 | 3.17498800  | 1.48462500  |
| H  | -1.81840400 | 2.14939200  | 0.66191600  |
| C  | -0.01446000 | 2.52354200  | -0.49241900 |
| H  | 1.06572100  | 2.66234200  | -0.31603300 |
| H  | -0.40302800 | 3.40570900  | -1.02690100 |
| H  | -1.82638400 | 0.50724500  | 2.46491300  |
| H  | -1.27927400 | 0.41614600  | -2.72945000 |
| Br | 2.47178900  | -0.60031900 | -0.07896900 |

### **<sup>S</sup>Ni(DME)Br<sub>2</sub>**

Gibbs free energy before correction = -6964.06053300

Gibbs free energy after correction = -6964.04606685

|    |             |             |             |
|----|-------------|-------------|-------------|
| Ni | -0.10893400 | 0.00001400  | 0.00000900  |
| Br | 1.48568800  | 1.61871800  | 0.21093400  |
| C  | -1.56379400 | -2.65920600 | 0.40006200  |
| H  | -0.68004200 | -3.14052400 | -0.03367400 |
| H  | -1.49768500 | -2.68471900 | 1.50267300  |
| C  | -1.56316200 | 2.65956700  | -0.39993100 |
| H  | -2.47671800 | 3.18548100  | -0.07586000 |
| H  | -1.49632000 | 2.68518400  | -1.50249400 |
| O  | -1.61484900 | 1.31471800  | 0.06833200  |
| O  | -1.61514600 | -1.31439600 | -0.06834800 |
| C  | -2.82597200 | -0.67090100 | 0.32197300  |
| H  | -2.86564300 | -0.59173600 | 1.42618200  |
| H  | -3.69218600 | -1.26556300 | -0.01703200 |
| C  | -2.82580200 | 0.67151200  | -0.32208900 |
| H  | -3.69189700 | 1.26635000  | 0.01689800  |
| H  | -2.86543200 | 0.59239700  | -1.42630200 |
| H  | -2.47715100 | -3.18513500 | 0.07545200  |
| H  | -0.67968800 | 3.14084000  | 0.03441400  |
| Br | 1.48531900  | -1.61904300 | -0.21094700 |

### **T<sup>pre</sup>**

Gibbs free energy before correction = -7381.20428800

Gibbs free energy after correction = -7381.18982182

|   |             |            |             |
|---|-------------|------------|-------------|
| O | -0.83705700 | 2.52894200 | -1.85686700 |
|---|-------------|------------|-------------|

|    |             |             |             |
|----|-------------|-------------|-------------|
| N  | -0.57558500 | 1.67035000  | 0.24583700  |
| C  | 2.18414400  | 2.84145900  | -1.17627900 |
| C  | 2.75755600  | 1.65370500  | -0.47174600 |
| C  | 2.64172800  | 1.35418300  | 0.83707900  |
| H  | -0.31310300 | 2.00937100  | 1.17599400  |
| H  | 1.96814900  | 2.57880500  | -2.22704900 |
| H  | 3.38201600  | 0.99418400  | -1.08952000 |
| H  | 3.19891100  | 0.51332200  | 1.26399700  |
| H  | 2.10114900  | 1.99174200  | 1.54727000  |
| H  | 2.98063400  | 3.60770800  | -1.23379600 |
| C  | -0.98894900 | -2.13286200 | -1.16082900 |
| C  | -2.00334000 | -0.23262400 | -0.31811400 |
| C  | -3.29748700 | -0.80522200 | -0.45417000 |
| C  | -3.38212300 | -2.10805200 | -1.00267900 |
| C  | -2.23215000 | -2.76547400 | -1.36694200 |
| H  | -0.04786800 | -2.64264600 | -1.40335100 |
| C  | -1.88036000 | 1.07933400  | 0.20150000  |
| C  | -4.43201300 | -0.06643200 | -0.03553500 |
| H  | -4.36726800 | -2.57100500 | -1.12481800 |
| H  | -2.25741000 | -3.77082700 | -1.79455100 |
| C  | -4.28231100 | 1.19416900  | 0.49418600  |
| C  | -2.99873600 | 1.77467200  | 0.60046600  |
| H  | -5.42168600 | -0.52303300 | -0.14154600 |
| H  | -5.15678800 | 1.76317400  | 0.82319000  |
| H  | -2.88194900 | 2.78999100  | 0.99399200  |
| N  | -0.87557200 | -0.91791200 | -0.65942500 |
| C  | -0.25014500 | 2.56213900  | -0.80132900 |
| C  | 0.93628300  | 3.45299200  | -0.54614000 |
| H  | 0.71825700  | 4.41311600  | -1.03860600 |
| H  | 1.08033700  | 3.65137700  | 0.52839700  |
| Br | 0.47167700  | -0.67354800 | 2.36296900  |
| Ni | 0.88405000  | -0.11201900 | 0.04339400  |
| Br | 2.39932900  | -1.72586000 | -0.89272400 |

### S<sub>T</sub><sup>pre</sup>

Gibbs free energy before correction = -7381.18495900

Gibbs free energy after correction = -7381.17049282

|   |             |             |             |
|---|-------------|-------------|-------------|
| O | 0.41160400  | -3.31350300 | -0.22205300 |
| N | -0.06025300 | -1.33524900 | -1.24810000 |
| C | 3.02611800  | -1.78206800 | 0.07653300  |
| C | 2.99445500  | -0.36955100 | 0.57129700  |
| C | 3.02777300  | 0.76192300  | -0.18641100 |

|    |             |             |             |
|----|-------------|-------------|-------------|
| H  | 0.32741500  | -0.55941400 | -1.79089100 |
| H  | 2.70057400  | -2.45914300 | 0.88426100  |
| H  | 3.15527300  | -0.26200700 | 1.64821400  |
| H  | 3.27340100  | 1.72510900  | 0.27880200  |
| H  | 3.12337000  | 0.71112800  | -1.27481100 |
| H  | 4.09773400  | -2.00972300 | -0.08526000 |
| C  | -1.43343000 | 1.97395700  | 0.85118200  |
| C  | -1.86396000 | -0.07307800 | -0.17471300 |
| C  | -3.25999500 | 0.07098300  | 0.08512100  |
| C  | -3.70650700 | 1.25324100  | 0.72126500  |
| C  | -2.79781500 | 2.21578000  | 1.08598800  |
| H  | -0.68241900 | 2.70124400  | 1.18011100  |
| C  | -1.41583300 | -1.23146300 | -0.88008900 |
| C  | -4.15596000 | -0.96360900 | -0.28084900 |
| H  | -4.77744600 | 1.37791800  | 0.91393300  |
| H  | -3.10212200 | 3.14445600  | 1.57430800  |
| C  | -3.68810700 | -2.09960000 | -0.89598100 |
| C  | -2.31890700 | -2.22128900 | -1.21021600 |
| H  | -5.22002500 | -0.83303900 | -0.05791900 |
| H  | -4.37577000 | -2.90427200 | -1.17243200 |
| H  | -1.95439800 | -3.10304700 | -1.74441400 |
| N  | -0.98584000 | 0.88228700  | 0.25753400  |
| C  | 0.78393000  | -2.34342400 | -0.85059400 |
| C  | 2.24037100  | -2.11048900 | -1.19114700 |
| H  | 2.62293700  | -3.05573100 | -1.60801900 |
| H  | 2.37094700  | -1.33717800 | -1.96764000 |
| Br | 0.80491300  | 1.88588200  | -1.83915800 |
| Ni | 0.93219300  | 0.65801500  | 0.21205000  |
| Br | 0.67440600  | -0.18216300 | 2.40105600  |

## S1

Gibbs free energy before correction = -7980.52405400

Gibbs free energy after correction = -7980.50958821

|   |            |             |             |
|---|------------|-------------|-------------|
| C | 1.25583800 | -2.61227300 | -1.80268500 |
| C | 2.28331300 | -2.42260600 | -0.69356000 |
| H | 1.62354900 | -2.11460200 | -2.71959000 |
| H | 1.13762500 | -3.68372900 | -2.02723000 |
| H | 1.91515700 | -2.83367300 | 0.26303800  |
| H | 3.18843500 | -3.00675300 | -0.95323700 |
| C | 2.73337900 | -1.00825200 | -0.52203000 |
| H | 2.97805000 | -0.48277600 | -1.45665200 |
| C | 3.13985600 | -0.43949800 | 0.66124500  |

|    |             |             |             |
|----|-------------|-------------|-------------|
| H  | 3.10812400  | -1.01426000 | 1.59373700  |
| H  | 3.74091000  | 0.47549200  | 0.66206100  |
| C  | -0.38947900 | 2.31721300  | 1.34665600  |
| C  | -1.45555100 | 1.02701400  | -0.27566800 |
| C  | -2.66555100 | 1.76352500  | -0.11446700 |
| C  | -2.67407000 | 2.81789600  | 0.83277100  |
| C  | -1.54391400 | 3.09462300  | 1.56280200  |
| H  | 0.53116000  | 2.51327800  | 1.90776800  |
| C  | -1.36989900 | -0.07481800 | -1.19875000 |
| C  | -3.80317800 | 1.41507700  | -0.88169100 |
| H  | -3.59340700 | 3.39799800  | 0.96933500  |
| H  | -1.51912200 | 3.89943600  | 2.30189000  |
| C  | -3.71654300 | 0.36668600  | -1.77410600 |
| C  | -2.52574400 | -0.36939600 | -1.93174700 |
| H  | -4.72819600 | 1.98586100  | -0.75042100 |
| H  | -4.58875400 | 0.09147000  | -2.37719200 |
| H  | -2.49783800 | -1.19702100 | -2.64594200 |
| N  | -0.35634500 | 1.33319000  | 0.47035700  |
| N  | -0.16730100 | -0.72755500 | -1.30580300 |
| C  | -0.11581300 | -2.05894100 | -1.46804700 |
| O  | -1.06452600 | -2.85648400 | -1.31205100 |
| K  | -2.40252200 | -2.27601200 | 0.79965300  |
| Ni | 1.22246700  | 0.24967800  | 0.21615300  |
| Br | 0.36875800  | -1.12919600 | 2.04427200  |
| Br | 2.12807100  | 2.09883800  | -0.96178800 |

## T<sub>I</sub>

Gibbs free energy before correction = -7980.54857700

Gibbs free energy after correction = -7980.53411121

|   |             |             |             |
|---|-------------|-------------|-------------|
| C | -1.60803700 | 2.28157000  | -1.97810900 |
| C | -2.70944700 | 2.11059200  | -0.93976900 |
| H | -1.82833000 | 1.63105500  | -2.84524200 |
| H | -1.59441300 | 3.32158200  | -2.33723100 |
| H | -2.45945900 | 2.63665400  | -0.00017900 |
| H | -3.62291500 | 2.59645700  | -1.33306000 |
| C | -3.04668400 | 0.68659500  | -0.66272600 |
| H | -3.12677800 | 0.02445900  | -1.53822400 |
| C | -3.34682100 | 0.18748200  | 0.55341200  |
| H | -3.34213600 | 0.82796000  | 1.44276900  |
| H | -3.69069000 | -0.84648400 | 0.66844700  |
| C | 0.94750700  | -2.27604900 | 1.38857300  |
| C | 1.71756300  | -0.82001900 | -0.24655600 |

|    |             |             |             |
|----|-------------|-------------|-------------|
| C  | 3.03676500  | -1.34900900 | -0.16461400 |
| C  | 3.25936400  | -2.39477700 | 0.76650500  |
| C  | 2.22397700  | -2.85606900 | 1.54441000  |
| H  | 0.09348600  | -2.62820000 | 1.98119600  |
| C  | 1.39209000  | 0.25406100  | -1.14208700 |
| C  | 4.05168600  | -0.81479300 | -0.99330900 |
| H  | 4.26513800  | -2.82110700 | 0.85133500  |
| H  | 2.36817700  | -3.65975000 | 2.27119400  |
| C  | 3.73443200  | 0.20753800  | -1.86217200 |
| C  | 2.43099700  | 0.74126100  | -1.93859700 |
| H  | 5.06582600  | -1.22233600 | -0.92877300 |
| H  | 4.50734200  | 0.62616600  | -2.51574300 |
| H  | 2.23297800  | 1.55326400  | -2.64199700 |
| N  | 0.71862100  | -1.30479700 | 0.53291600  |
| N  | 0.07060700  | 0.68485800  | -1.17290900 |
| C  | -0.20401300 | 1.97533400  | -1.50483200 |
| O  | 0.61733500  | 2.90433500  | -1.44473300 |
| K  | 1.83547000  | 2.68206200  | 0.84083300  |
| Ni | -1.06684600 | -0.40399200 | 0.14621000  |
| Br | -0.59186300 | 1.12878300  | 2.15749900  |
| Br | -1.85413800 | -2.50548500 | -0.84398900 |

## B

Gibbs free energy before correction = -523.20493800

Gibbs free energy after correction = -523.19047200

|   |             |             |             |
|---|-------------|-------------|-------------|
| B | 0.58190500  | 0.00157200  | -0.28371900 |
| C | -0.97923700 | 0.00055600  | -0.09826300 |
| C | -1.69844700 | -1.20232100 | -0.01392300 |
| C | -1.70010600 | 1.20234800  | -0.01238800 |
| C | -3.08329300 | -1.20908600 | 0.15004200  |
| H | -1.15529900 | -2.15266600 | -0.07897800 |
| C | -3.08496300 | 1.20697800  | 0.15158900  |
| H | -1.15827700 | 2.15352900  | -0.07626000 |
| C | -3.77927200 | -0.00158900 | 0.23308200  |
| H | -3.62556700 | -2.15896000 | 0.21360000  |
| H | -3.62854800 | 2.15602100  | 0.21636400  |
| H | -4.86719600 | -0.00241400 | 0.36219700  |
| O | 1.22940200  | 1.19805100  | -0.36024100 |
| H | 2.18848700  | 1.07183000  | -0.47435500 |
| O | 1.23083800  | -1.19403500 | -0.36162900 |
| H | 2.18967900  | -1.06569200 | -0.47613900 |
| C | 4.28885300  | -0.00258500 | 0.91050200  |

|   |            |             |             |
|---|------------|-------------|-------------|
| H | 4.90244900 | -0.90009900 | 1.10044800  |
| H | 3.44510200 | -0.00561500 | 1.61862300  |
| H | 4.90002500 | 0.89558500  | 1.10508600  |
| O | 3.74618700 | 0.00006200  | -0.39920000 |
| H | 4.46698400 | 0.00219200  | -1.04727300 |

### **KBr**

Gibbs free energy before correction = -3173.71411800

Gibbs free energy after correction = -3173.69965183

|    |            |            |             |
|----|------------|------------|-------------|
| K  | 0.00000000 | 0.00000000 | -1.90882200 |
| Br | 0.00000000 | 0.00000000 | 1.03621800  |

### **T<sub>1a</sub>**

Gibbs free energy before correction = -5929.35901300

Gibbs free energy after correction = -5929.34454683

|   |             |             |             |
|---|-------------|-------------|-------------|
| C | 0.67861700  | -2.65520100 | 0.30735400  |
| C | 1.48943400  | -2.61077200 | -0.98913400 |
| H | 0.68429900  | -3.66953600 | 0.73964400  |
| H | 1.13716900  | -1.97514300 | 1.05158800  |
| H | 1.60836600  | -1.56006200 | -1.30506900 |
| H | 2.50565800  | -2.99608600 | -0.78205500 |
| C | 0.84606600  | -3.39714100 | -2.08563000 |
| H | 0.78936600  | -4.48678800 | -1.93569700 |
| C | 0.30711700  | -2.85890700 | -3.18179000 |
| H | 0.33739200  | -1.77249500 | -3.35267800 |
| H | -0.17649200 | -3.47029000 | -3.95273000 |
| C | -1.68870800 | 2.92300400  | -0.14972100 |
| C | -2.42553300 | 0.83270200  | -0.84970100 |
| C | -3.61673600 | 1.38394100  | -1.39716800 |
| C | -3.79615600 | 2.78564900  | -1.28305300 |
| C | -2.84195600 | 3.55434400  | -0.66005000 |
| H | -0.91035800 | 3.51235200  | 0.35129500  |
| C | -2.16278400 | -0.58020500 | -0.90274500 |
| C | -4.55752300 | 0.52653700  | -2.01665300 |
| H | -4.70440200 | 3.23769300  | -1.69664600 |
| H | -2.95623400 | 4.63619100  | -0.55521300 |
| C | -4.29740400 | -0.82569300 | -2.07360200 |
| C | -3.12341600 | -1.38163900 | -1.52211700 |
| H | -5.47312400 | 0.95433100  | -2.43768400 |
| H | -5.01540800 | -1.49752100 | -2.55599600 |
| H | -2.95667500 | -2.45911500 | -1.58845900 |
| N | -1.49632200 | 1.62479400  | -0.24570500 |

|    |             |             |             |
|----|-------------|-------------|-------------|
| N  | -0.95664500 | -0.99993700 | -0.36646900 |
| C  | -0.76580400 | -2.26354000 | 0.08663100  |
| O  | -1.67261100 | -3.07244700 | 0.33790100  |
| K  | -3.08806900 | -1.58160300 | 1.96720300  |
| Ni | 0.10227900  | 0.56024000  | 0.36825600  |
| Br | -0.56831300 | 0.20234400  | 2.74332900  |
| B  | 2.32608700  | 1.63585400  | -0.51552200 |
| C  | 3.46677900  | 0.51754700  | -0.23504100 |
| C  | 3.52013500  | -0.21988400 | 0.95855700  |
| C  | 4.39008600  | 0.17590500  | -1.23865600 |
| C  | 4.44174700  | -1.25479300 | 1.14334700  |
| H  | 2.81731900  | 0.02450000  | 1.76765200  |
| C  | 5.31886800  | -0.85157800 | -1.06654000 |
| C  | 5.34546500  | -1.57439900 | 0.12902500  |
| H  | 4.45794500  | -1.81460200 | 2.08597100  |
| H  | 6.02831100  | -1.09229800 | -1.86686000 |
| H  | 6.07240500  | -2.38205100 | 0.26987900  |
| O  | 1.22390100  | 1.02807700  | -1.33577600 |
| H  | 1.53879100  | 0.35335100  | -1.95074800 |
| O  | 1.59357200  | 1.92362800  | 0.77171800  |
| H  | 1.31190900  | 2.84812800  | 0.78545100  |
| O  | 2.77246900  | 2.83991300  | -1.15371500 |
| H  | 4.37989500  | 0.73696900  | -2.18421500 |
| C  | 3.81345300  | 3.53744600  | -0.56055000 |
| H  | 4.76393800  | 2.96184800  | -0.53148000 |
| H  | 4.01533900  | 4.46741100  | -1.12317600 |
| H  | 3.59627300  | 3.83833300  | 0.48794700  |

### **S<sub>1a</sub>**

Gibbs free energy before correction = -5929.32489500

Gibbs free energy after correction = -5929.31042883

|   |            |             |             |
|---|------------|-------------|-------------|
| C | 0.65002700 | -2.76411500 | 0.40241000  |
| C | 1.52119300 | -2.64663300 | -0.84904100 |
| H | 0.58657400 | -3.81548400 | 0.72941700  |
| H | 1.10183000 | -2.18493600 | 1.22633200  |
| H | 1.69613200 | -1.58105000 | -1.08271600 |
| H | 2.51280200 | -3.08182100 | -0.62262000 |
| C | 0.91489500 | -3.33426700 | -2.02929500 |
| H | 0.76465400 | -4.42101900 | -1.92996200 |
| C | 0.51828500 | -2.72023400 | -3.14586900 |
| H | 0.64485600 | -1.63520600 | -3.27455000 |
| H | 0.06096800 | -3.26741100 | -3.97861900 |

|    |             |             |             |
|----|-------------|-------------|-------------|
| C  | -2.16330800 | 2.86475600  | 0.27377500  |
| C  | -2.46250800 | 0.82329300  | -0.76456600 |
| C  | -3.56106200 | 1.31990500  | -1.52846900 |
| C  | -3.91990500 | 2.67995600  | -1.34227300 |
| C  | -3.22645200 | 3.45691200  | -0.44737200 |
| H  | -1.59914200 | 3.46235000  | 1.00485900  |
| C  | -2.03835200 | -0.54631900 | -0.90902300 |
| C  | -4.24612000 | 0.46483900  | -2.42316600 |
| H  | -4.75496500 | 3.08866000  | -1.92254300 |
| H  | -3.48073200 | 4.50779400  | -0.28335900 |
| C  | -3.83668000 | -0.84482800 | -2.54426600 |
| C  | -2.75065100 | -1.34794100 | -1.80085900 |
| H  | -5.08842100 | 0.85989800  | -3.00094000 |
| H  | -4.35425100 | -1.51898900 | -3.23500000 |
| H  | -2.45423400 | -2.39111400 | -1.93480900 |
| N  | -1.80227800 | 1.61241700  | 0.12244500  |
| N  | -0.92292300 | -0.98166400 | -0.19063800 |
| C  | -0.76774700 | -2.29338400 | 0.16379200  |
| O  | -1.71409400 | -3.07834400 | 0.29721000  |
| K  | -3.08122000 | -1.35782500 | 1.82335900  |
| Ni | 0.16647400  | 0.37166700  | 0.57012900  |
| Br | -0.27839300 | -0.20805500 | 2.82863600  |
| B  | 2.03964500  | 1.69243200  | -0.38770800 |
| C  | 3.34507600  | 0.74652800  | -0.36336300 |
| C  | 3.74280000  | 0.02352700  | 0.77159700  |
| C  | 4.08256000  | 0.55026700  | -1.54353500 |
| C  | 4.82455800  | -0.86026600 | 0.73347600  |
| H  | 3.18029800  | 0.15065300  | 1.70606400  |
| C  | 5.16289600  | -0.33176600 | -1.59592900 |
| C  | 5.53658600  | -1.04271100 | -0.45311600 |
| H  | 5.11398500  | -1.41337800 | 1.63458900  |
| H  | 5.71924200  | -0.46656100 | -2.53063700 |
| H  | 6.38427800  | -1.73606200 | -0.48765900 |
| O  | 0.91011900  | 0.99240300  | -1.11766400 |
| H  | 1.22202500  | 0.29477800  | -1.71092900 |
| O  | 1.42751500  | 1.74967500  | 1.00514000  |
| H  | 0.96214100  | 2.59334300  | 1.11256900  |
| O  | 2.19227400  | 2.99568500  | -0.94061300 |
| H  | 3.79940700  | 1.10666500  | -2.44876600 |
| C  | 3.23200800  | 3.78379700  | -0.46190200 |
| H  | 4.23393700  | 3.37817700  | -0.71663900 |
| H  | 3.16826300  | 4.79562700  | -0.90063100 |



H 3.20909800 3.90832500 0.64210700

### <sup>S</sup>TS1

Gibbs free energy before correction = -5929.30771300

Gibbs free energy after correction = -5929.29324683

|    |             |             |             |
|----|-------------|-------------|-------------|
| C  | -0.41342800 | 2.25468500  | 1.55838000  |
| C  | -0.81421900 | 3.53458300  | 0.81780300  |
| H  | -0.18885400 | 2.47809800  | 2.61461600  |
| H  | -1.23204000 | 1.52256100  | 1.53110500  |
| H  | -1.05474700 | 3.29551700  | -0.23478500 |
| H  | -1.74791300 | 3.91567700  | 1.27508000  |
| C  | 0.23451600  | 4.59816000  | 0.86302400  |
| H  | 0.56875600  | 4.90466800  | 1.86683400  |
| C  | 0.78099300  | 5.17367700  | -0.21024000 |
| H  | 0.47643200  | 4.88592700  | -1.22650400 |
| H  | 1.54507100  | 5.95514300  | -0.12285600 |
| C  | 1.30720800  | -2.84973500 | -1.00053600 |
| C  | 2.09242300  | -0.67925100 | -1.24703900 |
| C  | 3.26890500  | -1.10775200 | -1.91307100 |
| C  | 3.42068900  | -2.50458100 | -2.10267800 |
| C  | 2.45612400  | -3.36857800 | -1.63486100 |
| H  | 0.51390400  | -3.50796100 | -0.62832000 |
| C  | 1.85250700  | 0.68159200  | -0.92716300 |
| C  | 4.20319600  | -0.12423300 | -2.31862700 |
| H  | 4.31335800  | -2.88046800 | -2.61439300 |
| H  | 2.55651100  | -4.45037400 | -1.75340300 |
| C  | 3.95242700  | 1.20385900  | -2.03532100 |
| C  | 2.79574600  | 1.61343400  | -1.33577800 |
| H  | 5.11007700  | -0.43358700 | -2.84815300 |
| H  | 4.67113700  | 1.96770600  | -2.34999000 |
| H  | 2.64408000  | 2.67196400  | -1.10303500 |
| N  | 1.13225100  | -1.55312800 | -0.83172500 |
| N  | 0.68219000  | 0.93740200  | -0.19871900 |
| C  | 0.82904400  | 1.68156500  | 0.94041500  |
| O  | 1.93152500  | 1.94970300  | 1.43878400  |
| K  | 2.90062300  | -0.34991600 | 2.16072500  |
| Ni | -0.48113300 | -0.60794800 | -0.32785800 |
| Br | 0.02120000  | -1.30572700 | 2.71481400  |
| B  | -2.77229400 | -1.41262100 | -0.09408900 |
| C  | -2.35195900 | 0.24436800  | -0.67818200 |
| C  | -3.09945100 | 1.20888200  | 0.02459400  |
| C  | -2.15506100 | 0.47044600  | -2.05885600 |

|   |             |             |             |
|---|-------------|-------------|-------------|
| C | -3.62619600 | 2.33225200  | -0.60584700 |
| H | -3.31386100 | 1.03136600  | 1.08569300  |
| C | -2.63321500 | 1.61584500  | -2.69397500 |
| C | -3.37945700 | 2.54344900  | -1.96509700 |
| H | -4.23187900 | 3.04984700  | -0.04126300 |
| H | -2.45004500 | 1.77430200  | -3.76212200 |
| H | -3.78326200 | 3.43200700  | -2.46279100 |
| O | -1.52057800 | -2.17379500 | -0.47024300 |
| H | -1.60383600 | -2.44378800 | -1.39972000 |
| O | -3.02791800 | -1.46066300 | 1.27806500  |
| H | -2.21140300 | -1.43179400 | 1.80835300  |
| O | -3.86057000 | -1.78089700 | -0.93339500 |
| H | -1.62716200 | -0.27977000 | -2.66526400 |
| C | -4.45975900 | -3.00514800 | -0.64116700 |
| H | -4.92528000 | -3.02356000 | 0.36394100  |
| H | -5.25272800 | -3.21466200 | -1.38095400 |
| H | -3.74392300 | -3.85414400 | -0.68110800 |

### <sup>T</sup>TS1

Gibbs free energy before correction = -5929.33138700

Gibbs free energy after correction = -5929.31692083

|   |             |             |             |
|---|-------------|-------------|-------------|
| C | -0.29557800 | 2.52831700  | 1.38550700  |
| C | -0.61933100 | 3.59862200  | 0.33970300  |
| H | -0.14814300 | 2.99138000  | 2.37568000  |
| H | -1.13252300 | 1.81577800  | 1.45559300  |
| H | -0.83999300 | 3.11718100  | -0.63103300 |
| H | -1.54402400 | 4.12007600  | 0.65295500  |
| C | 0.48604700  | 4.59020800  | 0.16985800  |
| H | 0.76584800  | 5.16144400  | 1.06940300  |
| C | 1.15440800  | 4.79649500  | -0.96712400 |
| H | 0.90935200  | 4.23382900  | -1.87937000 |
| H | 1.96568300  | 5.53063400  | -1.03870100 |
| C | 1.36678600  | -2.91549300 | -1.05602200 |
| C | 2.25118800  | -0.76962300 | -1.07890700 |
| C | 3.42736800  | -1.20694100 | -1.75226700 |
| C | 3.51409500  | -2.58507100 | -2.07228400 |
| C | 2.49686900  | -3.43944700 | -1.71738900 |
| H | 0.53608700  | -3.56712200 | -0.75994200 |
| C | 2.08851400  | 0.59228400  | -0.66588500 |
| C | 4.44693300  | -0.27113300 | -2.04444700 |
| H | 4.40497900  | -2.95225100 | -2.59388600 |
| H | 2.54392900  | -4.50850400 | -1.93994300 |

|    |             |             |             |
|----|-------------|-------------|-------------|
| C  | 4.28262600  | 1.04158200  | -1.65266000 |
| C  | 3.12887800  | 1.47120000  | -0.96709800 |
| H  | 5.34824100  | -0.60764400 | -2.56699400 |
| H  | 5.06511700  | 1.77605000  | -1.87128800 |
| H  | 3.04273500  | 2.51930900  | -0.66551900 |
| N  | 1.24834000  | -1.63523700 | -0.76223700 |
| N  | 0.90621900  | 0.93474500  | -0.02127300 |
| C  | 0.97488500  | 1.80246800  | 1.02724500  |
| O  | 2.00811000  | 2.02792200  | 1.67813300  |
| K  | 2.79105500  | -0.36367800 | 2.29502800  |
| Ni | -0.44285300 | -0.67673300 | -0.03178500 |
| Br | -0.29710500 | -1.16636800 | 2.42262100  |
| B  | -2.82491300 | -1.77858200 | -0.18155200 |
| C  | -2.32793600 | 0.17905600  | -0.49121700 |
| C  | -3.16183400 | 1.04503900  | 0.23485600  |
| C  | -2.11042600 | 0.51415600  | -1.84451600 |
| C  | -3.74991800 | 2.17433700  | -0.34246200 |
| H  | -3.37343000 | 0.81178000  | 1.28825300  |
| C  | -2.67831600 | 1.64078100  | -2.44085800 |
| C  | -3.50778100 | 2.47390200  | -1.68432600 |
| H  | -4.40391700 | 2.82274400  | 0.25283300  |
| H  | -2.48589500 | 1.86827800  | -3.49584700 |
| H  | -3.96800300 | 3.35582500  | -2.14405300 |
| O  | -1.56148500 | -2.42179100 | -0.48814700 |
| H  | -1.54034700 | -2.61539400 | -1.43749700 |
| O  | -3.28219200 | -1.86378700 | 1.12354100  |
| H  | -2.55233500 | -1.76775500 | 1.75416900  |
| O  | -3.75330000 | -1.98353100 | -1.20703800 |
| H  | -1.47913900 | -0.14449300 | -2.46784900 |
| C  | -5.05124500 | -1.50362400 | -1.07595800 |
| H  | -5.66460400 | -1.86580100 | -1.91917800 |
| H  | -5.53578300 | -1.83670200 | -0.13806900 |
| H  | -5.08913300 | -0.39420300 | -1.08907200 |

## BH

Gibbs free energy before correction = -291.40914900

Gibbs free energy after correction = -291.39468271

|   |             |             |             |
|---|-------------|-------------|-------------|
| O | 0.57099700  | 1.38770400  | -0.00004100 |
| H | -0.30255400 | 1.79636700  | 0.00016100  |
| O | -0.59445700 | -0.72551200 | 0.00005300  |
| B | 0.54826300  | 0.02592500  | -0.00007200 |
| O | 1.75073600  | -0.61632100 | -0.00030800 |

|   |             |             |             |
|---|-------------|-------------|-------------|
| H | 1.62932500  | -1.57404600 | -0.00036800 |
| C | -1.86439400 | -0.13087100 | 0.00030100  |
| H | -2.03426400 | 0.49381000  | -0.89821600 |
| H | -2.63182000 | -0.92146200 | 0.00055100  |
| H | -2.03384200 | 0.49396900  | 0.89878900  |

## **S<sub>1b</sub>**

Gibbs free energy before correction = -5637.95173800

Gibbs free energy after correction = -5637.93727179

|    |             |             |             |
|----|-------------|-------------|-------------|
| C  | 0.46782000  | -2.66530200 | 2.01013700  |
| C  | -0.09587700 | -3.31733900 | 0.74833400  |
| H  | -0.36625700 | -2.46683500 | 2.71104600  |
| H  | 1.16318900  | -3.35592100 | 2.51265000  |
| H  | 0.68420300  | -3.40610600 | -0.02791400 |
| H  | -0.40689800 | -4.34973000 | 1.00431800  |
| C  | -1.30184300 | -2.60728100 | 0.21113500  |
| H  | -2.09193300 | -2.46092800 | 0.96454200  |
| C  | -1.66201900 | -2.46805700 | -1.12353700 |
| H  | -1.02376900 | -2.87070700 | -1.91903600 |
| H  | -2.70903600 | -2.28356900 | -1.39184500 |
| C  | -0.79538200 | 1.82658100  | -1.84409800 |
| C  | 0.51362700  | 1.71919000  | 0.07346200  |
| C  | 0.96418600  | 3.05798700  | -0.11212300 |
| C  | 0.47288500  | 3.76602500  | -1.23810700 |
| C  | -0.39973300 | 3.15488200  | -2.10495000 |
| H  | -1.49719300 | 1.31439600  | -2.51373400 |
| C  | 0.98620400  | 0.92231700  | 1.17927300  |
| C  | 1.88124800  | 3.62302900  | 0.80734900  |
| H  | 0.80357500  | 4.79815800  | -1.39912000 |
| H  | -0.79379600 | 3.67240000  | -2.98343000 |
| C  | 2.32210900  | 2.86248200  | 1.86964000  |
| C  | 1.88948500  | 1.53363300  | 2.05587400  |
| H  | 2.22192900  | 4.65249900  | 0.65529600  |
| H  | 3.02709800  | 3.29080400  | 2.59069700  |
| H  | 2.26494800  | 0.96249300  | 2.90892800  |
| N  | -0.35663500 | 1.14685100  | -0.80517400 |
| N  | 0.48245100  | -0.35122900 | 1.29176700  |
| C  | 1.21988900  | -1.36612700 | 1.77702900  |
| O  | 2.44657700  | -1.33501500 | 2.00196000  |
| K  | 3.67071500  | -0.29887500 | -0.01822600 |
| Ni | -0.79800600 | -0.76193900 | -0.42317100 |
| Br | 1.28458800  | -1.30025800 | -1.83790900 |

|   |             |             |             |
|---|-------------|-------------|-------------|
| C | -4.88641100 | 1.01556600  | 1.12142700  |
| C | -3.84843600 | 0.75312300  | 2.01666200  |
| C | -2.64496800 | 0.20335600  | 1.56379000  |
| C | -2.45740700 | -0.09881300 | 0.20866300  |
| C | -3.50620200 | 0.16823000  | -0.68079500 |
| C | -4.70947500 | 0.72197700  | -0.23102400 |
| H | -5.82902500 | 1.44633000  | 1.47641800  |
| H | -3.97327200 | 0.97902600  | 3.08243900  |
| H | -1.83568100 | 0.00616600  | 2.27842800  |
| H | -3.39461000 | -0.05148200 | -1.75122800 |
| H | -5.51499500 | 0.92297100  | -0.94723400 |

### **T<sub>b</sub>**

Gibbs free energy before correction = -5637.94895000

Gibbs free energy after correction = -5637.93448379

|   |             |             |             |
|---|-------------|-------------|-------------|
| C | 0.43260900  | -2.45317600 | 2.37977400  |
| C | -0.15079100 | -3.37072200 | 1.30925700  |
| H | -0.38906400 | -2.08557800 | 3.02342000  |
| H | 1.12306600  | -3.02526600 | 3.01794800  |
| H | 0.60039700  | -3.61012600 | 0.53390700  |
| H | -0.40898100 | -4.33021300 | 1.79742000  |
| C | -1.39180100 | -2.83586700 | 0.68068900  |
| H | -2.11567400 | -2.37548700 | 1.37087100  |
| C | -1.71199000 | -2.93473300 | -0.62059100 |
| H | -1.04272100 | -3.42687500 | -1.33534000 |
| H | -2.68424300 | -2.58967300 | -0.99227800 |
| C | -0.38269300 | 1.91031400  | -2.00653700 |
| C | 0.71734900  | 1.80746200  | 0.03354100  |
| C | 1.18588500  | 3.14657600  | -0.09725800 |
| C | 0.80770200  | 3.85489000  | -1.26645500 |
| C | 0.03090400  | 3.24276700  | -2.22090600 |
| H | -1.00134900 | 1.38884300  | -2.74952900 |
| C | 1.05934400  | 1.00144800  | 1.17238400  |
| C | 2.00037600  | 3.70062400  | 0.91787300  |
| H | 1.14874100  | 4.88866400  | -1.39156600 |
| H | -0.27031800 | 3.76373000  | -3.13363200 |
| C | 2.32444900  | 2.92565800  | 2.01180500  |
| C | 1.86998700  | 1.59792000  | 2.14170000  |
| H | 2.35836000  | 4.73031000  | 0.81524400  |
| H | 2.95091400  | 3.34289500  | 2.80767100  |
| H | 2.15584600  | 1.02447800  | 3.02692300  |
| N | -0.05323300 | 1.23554600  | -0.92740900 |

|    |             |             |             |
|----|-------------|-------------|-------------|
| N  | 0.52085700  | -0.27725100 | 1.24729400  |
| C  | 1.21659500  | -1.25768300 | 1.88048500  |
| O  | 2.44448200  | -1.23588100 | 2.06891700  |
| K  | 3.45599300  | -0.52669200 | -0.22223600 |
| Ni | -0.71525900 | -0.64597700 | -0.37819700 |
| Br | 1.08609300  | -1.63643700 | -1.97423700 |
| C  | -5.01758900 | 1.25601500  | 0.82276800  |
| C  | -4.00803800 | 1.13512200  | 1.77987900  |
| C  | -2.77830800 | 0.56446400  | 1.43408900  |
| C  | -2.50559200 | 0.08840200  | 0.13866600  |
| C  | -3.54590300 | 0.22585700  | -0.80039700 |
| C  | -4.78117400 | 0.79759600  | -0.47451100 |
| H  | -5.98273200 | 1.70352500  | 1.08644200  |
| H  | -4.18058100 | 1.49037800  | 2.80365900  |
| H  | -2.00315200 | 0.48492100  | 2.21266100  |
| H  | -3.40052800 | -0.12823900 | -1.83420600 |
| H  | -5.56499300 | 0.88488000  | -1.23739300 |

### **T<sub>ic</sub>**

Gibbs free energy before correction = -3586.76811700

Gibbs free energy after correction = -3586.75365076

|   |             |             |             |
|---|-------------|-------------|-------------|
| C | -1.64078000 | -1.03556300 | 2.60134100  |
| C | -1.55869600 | -2.38661300 | 3.30086700  |
| H | -2.05430500 | -1.13719300 | 1.58248300  |
| H | -2.34894600 | -0.37182500 | 3.13466900  |
| H | -1.05228400 | -2.27409600 | 4.27427900  |
| H | -2.58714200 | -2.73737600 | 3.50323500  |
| C | -0.85655600 | -3.41524000 | 2.47309700  |
| H | -1.34304600 | -3.66776000 | 1.51689800  |
| C | 0.28662000  | -4.02988600 | 2.79356100  |
| H | 0.80058200  | -3.81663200 | 3.74187700  |
| H | 0.73305400  | -4.79161300 | 2.14154500  |
| C | -0.28050800 | 2.99067500  | -1.62821700 |
| C | 0.73450300  | 2.48345100  | 0.40184500  |
| C | 1.62749600  | 3.58180500  | 0.28085800  |
| C | 1.50479700  | 4.39575300  | -0.87169600 |
| C | 0.54878000  | 4.11316600  | -1.82047200 |
| H | -1.03637700 | 2.71288700  | -2.37416100 |
| C | 0.77276200  | 1.60289500  | 1.54386800  |
| C | 2.59138500  | 3.81094000  | 1.29439700  |
| H | 2.18175300  | 5.24931700  | -0.98950100 |
| H | 0.43041500  | 4.72983300  | -2.71510600 |

|    |             |             |             |
|----|-------------|-------------|-------------|
| C  | 2.63389400  | 2.96227900  | 2.37610100  |
| C  | 1.74559500  | 1.87013100  | 2.50911400  |
| H  | 3.28153300  | 4.65520400  | 1.19529300  |
| H  | 3.37397100  | 3.12681200  | 3.16690100  |
| H  | 1.80981000  | 1.22804300  | 3.38783700  |
| N  | -0.18204200 | 2.21551100  | -0.56663000 |
| N  | -0.20278700 | 0.61181600  | 1.54982300  |
| C  | -0.31845500 | -0.29372000 | 2.55228600  |
| O  | 0.55990300  | -0.55617700 | 3.38882100  |
| K  | 1.88353800  | -1.69732000 | 1.24946400  |
| Ni | -0.94279400 | 0.33675700  | -0.34343600 |
| C  | -5.75225000 | 0.68702200  | -0.50894200 |
| C  | -4.98546900 | 1.62909300  | 0.18158000  |
| C  | -3.59284100 | 1.51022600  | 0.21105400  |
| C  | -2.91311400 | 0.46333300  | -0.43953100 |
| C  | -3.71579900 | -0.46850600 | -1.12290300 |
| C  | -5.11140100 | -0.36663800 | -1.16216700 |
| H  | -6.84443600 | 0.77370400  | -0.53598800 |
| H  | -5.47881800 | 2.46019900  | 0.70068500  |
| H  | -3.01511700 | 2.26474200  | 0.76890000  |
| H  | -3.24917200 | -1.31842400 | -1.64754100 |
| H  | -5.70248000 | -1.11451900 | -1.70517600 |
| B  | 0.13867000  | -1.53604800 | -1.92423700 |
| C  | 1.74432000  | -1.30621700 | -1.82408300 |
| C  | 2.32161900  | -0.03780700 | -1.64957100 |
| C  | 2.60078800  | -2.41710600 | -1.71592900 |
| C  | 3.67617900  | 0.11929100  | -1.33483100 |
| H  | 1.69276500  | 0.85631300  | -1.75232300 |
| C  | 3.95909600  | -2.27591600 | -1.41982100 |
| C  | 4.49901200  | -1.00228300 | -1.21206000 |
| H  | 4.09215700  | 1.12311700  | -1.18698000 |
| H  | 4.60118400  | -3.16067600 | -1.34168100 |
| H  | 5.55975900  | -0.88579400 | -0.96533300 |
| O  | -0.51544000 | -0.25673900 | -2.34279000 |
| H  | -1.36634500 | -0.45772400 | -2.75716500 |
| O  | -0.29722500 | -2.65660400 | -2.70628300 |
| O  | -0.31976000 | -1.78186200 | -0.50162000 |
| H  | -1.06423700 | -2.40143100 | -0.51660100 |
| H  | 2.18003900  | -3.42397200 | -1.84780600 |
| C  | 0.02202500  | -2.66394600 | -4.05721200 |
| H  | -0.34778300 | -3.59237100 | -4.52818500 |
| H  | -0.42991300 | -1.81593000 | -4.61470500 |

H 1.11701300 -2.61663800 -4.24137100

**S<sub>1c</sub>**

Gibbs free energy before correction = -3547.53424100

Gibbs free energy after correction = -3547.51977496

|    |             |             |             |
|----|-------------|-------------|-------------|
| C  | 1.99865900  | -0.42620600 | 2.06932800  |
| C  | 3.36034300  | -1.02711700 | 1.70114700  |
| H  | 1.87461400  | -0.41162900 | 3.16513700  |
| H  | 1.95326500  | 0.61036700  | 1.70008800  |
| H  | 3.55955600  | -0.85563000 | 0.62964200  |
| H  | 4.13780100  | -0.47638700 | 2.26353600  |
| C  | 3.45579500  | -2.49009100 | 1.99228700  |
| H  | 3.36750700  | -2.79066400 | 3.04814800  |
| C  | 3.59735000  | -3.42955900 | 1.05409500  |
| H  | 3.67223700  | -3.15925800 | -0.00978900 |
| H  | 3.64867200  | -4.49671000 | 1.30097500  |
| C  | -2.34934000 | 0.23582300  | -2.06274600 |
| C  | -1.30027500 | -1.64269300 | -1.21041800 |
| C  | -2.22209200 | -2.52100400 | -1.83849300 |
| C  | -3.24368000 | -1.92585200 | -2.62216500 |
| C  | -3.30574300 | -0.55630400 | -2.73452600 |
| H  | -2.36696500 | 1.32843700  | -2.13906100 |
| C  | -0.24375000 | -2.12874600 | -0.38593000 |
| C  | -2.07148400 | -3.91551100 | -1.64355200 |
| H  | -3.97093100 | -2.56950900 | -3.12890900 |
| H  | -4.07996200 | -0.06861200 | -3.33228800 |
| C  | -1.04318300 | -4.38095800 | -0.84905300 |
| C  | -0.13422600 | -3.50342400 | -0.21878900 |
| H  | -2.77256700 | -4.60139500 | -2.13002700 |
| H  | -0.92079400 | -5.45854700 | -0.69808300 |
| H  | 0.66534000  | -3.90664900 | 0.41007900  |
| N  | -1.38941000 | -0.28465700 | -1.32340400 |
| N  | 0.58365400  | -1.15389400 | 0.18254900  |
| C  | 0.86066000  | -1.24956900 | 1.51553200  |
| O  | 0.22911700  | -1.99140200 | 2.28639700  |
| K  | -2.23239300 | -1.28555300 | 1.77036400  |
| Ni | 0.36059100  | 0.52104700  | -0.73946000 |
| B  | -0.79291200 | 3.27810100  | -0.45171400 |
| C  | -1.49772900 | 2.47584700  | 0.78916800  |
| C  | -2.88819000 | 2.30721800  | 0.88283200  |
| C  | -0.73892400 | 2.05066700  | 1.89523200  |
| C  | -3.49988500 | 1.76367500  | 2.01880400  |



|   |             |             |             |
|---|-------------|-------------|-------------|
| H | -3.52308100 | 2.64584600  | 0.05310400  |
| C | -1.32881600 | 1.51206400  | 3.04198900  |
| C | -2.72068400 | 1.37565900  | 3.11301300  |
| H | -4.59121800 | 1.66683100  | 2.06288900  |
| H | -0.70671800 | 1.21709000  | 3.89614300  |
| H | -3.19434400 | 0.98002300  | 4.01988900  |
| O | -0.14476700 | 2.21921300  | -1.41139800 |
| H | 0.61855400  | 2.66687200  | -1.80316900 |
| O | -1.70032300 | 4.07389100  | -1.24434400 |
| H | -2.26821700 | 3.51742600  | -1.78574000 |
| O | 0.25080500  | 4.12223700  | 0.07595900  |
| H | 0.33141200  | 4.88998700  | -0.50088500 |
| H | 0.35019300  | 2.18876000  | 1.87219500  |
| C | 2.95346900  | 0.02904800  | -1.66529800 |
| C | 4.30626600  | 0.25570000  | -1.93539900 |
| C | 4.94184800  | 1.38668000  | -1.41939000 |
| C | 4.20309500  | 2.29555100  | -0.65933200 |
| C | 2.84207500  | 2.07713400  | -0.41765300 |
| C | 2.19125900  | 0.92751900  | -0.89563500 |
| H | 2.48714700  | -0.88741800 | -2.05532800 |
| H | 4.87083600  | -0.46248100 | -2.54244100 |
| H | 6.00577900  | 1.56245400  | -1.61420200 |
| H | 4.68982100  | 3.19302100  | -0.25795900 |
| H | 2.27027300  | 2.82851100  | 0.14536900  |

## <sup>S</sup>TS2

Gibbs free energy before correction = -3586.71644400

Gibbs free energy after correction = -3586.70197776

|   |             |             |             |
|---|-------------|-------------|-------------|
| C | -0.18924200 | -1.50118900 | 2.40638800  |
| C | -1.57845900 | -2.14130000 | 2.52486300  |
| H | 0.34267800  | -1.57077800 | 3.37116800  |
| H | 0.39717200  | -2.04280800 | 1.64403500  |
| H | -2.04968500 | -2.19174000 | 1.52729000  |
| H | -1.44361100 | -3.18492000 | 2.86761500  |
| C | -2.48557900 | -1.41206600 | 3.46225300  |
| H | -2.14720900 | -1.32826600 | 4.50710900  |
| C | -3.63917800 | -0.84556900 | 3.10128400  |
| H | -3.99748600 | -0.90128600 | 2.06272900  |
| H | -4.27373200 | -0.31064300 | 3.81792100  |
| C | -0.32469000 | 1.53891300  | -3.09300000 |
| C | -1.14339300 | 1.89414900  | -0.96366500 |
| C | -1.84278100 | 3.06829400  | -1.38228100 |

|    |             |             |             |
|----|-------------|-------------|-------------|
| C  | -1.73213500 | 3.44168300  | -2.74720100 |
| C  | -0.98075000 | 2.68138000  | -3.60841000 |
| H  | 0.29075300  | 0.91323800  | -3.75734500 |
| C  | -1.23477000 | 1.43855800  | 0.40678300  |
| C  | -2.61530900 | 3.80824700  | -0.45670900 |
| H  | -2.26145000 | 4.33744900  | -3.09192100 |
| H  | -0.88291300 | 2.94065300  | -4.66651900 |
| C  | -2.69975400 | 3.36400600  | 0.84481200  |
| C  | -2.02879700 | 2.20181000  | 1.27279300  |
| H  | -3.13664100 | 4.71058400  | -0.79362800 |
| H  | -3.30505500 | 3.91426100  | 1.57351500  |
| H  | -2.13862800 | 1.88267100  | 2.31168800  |
| N  | -0.39998300 | 1.17186200  | -1.83619100 |
| N  | -0.59389000 | 0.26134900  | 0.76257000  |
| C  | -0.31161600 | -0.03376800 | 2.06125600  |
| O  | -0.18312400 | 0.81059400  | 2.96267500  |
| K  | 1.13030600  | 2.73713100  | 1.78651200  |
| Ni | 0.28366900  | -0.76996400 | -0.61899500 |
| B  | 2.48578100  | -1.75704100 | -1.17325500 |
| C  | 2.18175700  | 0.03886000  | -0.12077000 |
| C  | 2.60575100  | 1.18112100  | -0.83618900 |
| C  | 2.73649700  | -0.09969200 | 1.16768100  |
| C  | 3.51296200  | 2.11053900  | -0.32092800 |
| H  | 2.22871900  | 1.33980100  | -1.85694200 |
| C  | 3.65484400  | 0.81141200  | 1.70528500  |
| C  | 4.05149000  | 1.92400600  | 0.95826600  |
| H  | 3.81448900  | 2.97804200  | -0.92018100 |
| H  | 4.06899900  | 0.64894800  | 2.70768300  |
| H  | 4.77707100  | 2.63735200  | 1.36530600  |
| O  | 1.27302700  | -1.73519600 | -1.95893100 |
| H  | 0.90042800  | -2.62643900 | -2.06103000 |
| O  | 3.67264700  | -1.45188000 | -1.82200500 |
| H  | 3.52434200  | -0.83169000 | -2.54539800 |
| O  | 2.52161200  | -2.77246100 | -0.22649200 |
| H  | 2.46139100  | -0.97168600 | 1.77717400  |
| C  | -2.58042200 | -1.33752000 | -1.15203300 |
| C  | -3.67663800 | -2.18401400 | -1.34139200 |
| C  | -3.51253600 | -3.57128500 | -1.30685000 |
| C  | -2.23778900 | -4.09444000 | -1.09137200 |
| C  | -1.14912300 | -3.23348100 | -0.91015100 |
| C  | -1.28239100 | -1.83078100 | -0.92631600 |
| H  | -2.75870800 | -0.25266900 | -1.17358400 |

|   |             |             |             |
|---|-------------|-------------|-------------|
| H | -4.67182900 | -1.75667100 | -1.51671100 |
| H | -4.37144400 | -4.23686300 | -1.44811800 |
| H | -2.08795500 | -5.18059500 | -1.05700500 |
| H | -0.16570100 | -3.69194200 | -0.71304000 |
| C | 3.74440500  | -3.18432900 | 0.30962800  |
| H | 3.55787100  | -3.92589500 | 1.10436100  |
| H | 4.39689100  | -3.65572000 | -0.44956700 |
| H | 4.31347800  | -2.34587000 | 0.75701100  |

## <sup>T</sup>TS2

Gibbs free energy before correction = -3586.73071900

Gibbs free energy after correction = -3586.71625276

|   |             |             |             |
|---|-------------|-------------|-------------|
| C | 0.71747400  | -1.72050000 | 2.23433600  |
| C | 1.88852200  | -2.49511800 | 2.82908100  |
| H | 0.45630400  | -2.10549500 | 1.22932500  |
| H | -0.19069800 | -1.87886900 | 2.84732200  |
| H | 2.16906700  | -2.05432700 | 3.80037200  |
| H | 1.55690900  | -3.53190000 | 3.02143700  |
| C | 3.07759300  | -2.53410300 | 1.92247300  |
| H | 2.92489400  | -3.05040900 | 0.96122000  |
| C | 4.27592600  | -1.99937000 | 2.18017500  |
| H | 4.47677500  | -1.48274500 | 3.12965700  |
| H | 5.11103600  | -2.08941900 | 1.47322300  |
| C | -2.14258600 | 1.93350800  | -1.57698700 |
| C | -0.67745100 | 2.37432800  | 0.17350700  |
| C | -0.82726200 | 3.77826400  | -0.00161600 |
| C | -1.68588200 | 4.22154400  | -1.03787400 |
| C | -2.34645300 | 3.30638800  | -1.82249300 |
| H | -2.63783500 | 1.16660000  | -2.18525700 |
| C | 0.17417000  | 1.83418100  | 1.20748600  |
| C | -0.13244700 | 4.66954200  | 0.85293300  |
| H | -1.81248900 | 5.29874100  | -1.19407000 |
| H | -3.01827100 | 3.61934600  | -2.62605600 |
| C | 0.66689700  | 4.15347000  | 1.84581900  |
| C | 0.82542600  | 2.76164700  | 2.02982200  |
| H | -0.25219000 | 5.74851300  | 0.70925600  |
| H | 1.20057100  | 4.83002300  | 2.52240200  |
| H | 1.45198700  | 2.39706000  | 2.84428700  |
| N | -1.34103200 | 1.49639000  | -0.62550700 |
| N | 0.21987800  | 0.45044500  | 1.27245700  |
| C | 0.95917400  | -0.22136500 | 2.17725700  |
| O | 1.82322200  | 0.27796500  | 2.92282000  |

|    |             |             |             |
|----|-------------|-------------|-------------|
| K  | 3.32147600  | 0.76225700  | 0.75872700  |
| Ni | -0.87615600 | -0.44573200 | -0.25791400 |
| C  | -4.69582500 | -1.91206400 | 2.40689300  |
| C  | -4.11451500 | -0.65876200 | 2.61577600  |
| C  | -3.01631300 | -0.25939100 | 1.84846800  |
| C  | -2.44961100 | -1.06858700 | 0.84340500  |
| C  | -3.06622700 | -2.32451800 | 0.66405700  |
| C  | -4.16312400 | -2.74803900 | 1.42563000  |
| H  | -5.55549200 | -2.23363400 | 3.00604900  |
| H  | -4.52158600 | 0.01038700  | 3.38443300  |
| H  | -2.58218500 | 0.73153400  | 2.05429400  |
| H  | -2.66946300 | -3.02366600 | -0.09067900 |
| H  | -4.60322300 | -3.73820800 | 1.25194700  |
| B  | -0.70047500 | -1.86750500 | -2.41140500 |
| C  | 0.86327900  | -0.63194100 | -1.57891300 |
| C  | 1.24640100  | 0.58370400  | -2.19032200 |
| C  | 1.92944500  | -1.52254800 | -1.32491300 |
| C  | 2.57076300  | 0.88527100  | -2.53390700 |
| H  | 0.48049800  | 1.33680500  | -2.43013400 |
| C  | 3.25796600  | -1.25438900 | -1.66824000 |
| C  | 3.58753400  | -0.04061700 | -2.28170900 |
| H  | 2.80932800  | 1.84170500  | -3.01479300 |
| H  | 4.04114200  | -1.99601500 | -1.46422100 |
| H  | 4.62365400  | 0.17837900  | -2.56499400 |
| O  | -1.87579500 | -1.10914500 | -2.13985700 |
| H  | -2.55834900 | -1.68464000 | -1.76354900 |
| O  | -0.20581700 | -1.90979300 | -3.70845400 |
| O  | -0.62107500 | -3.05953700 | -1.69048400 |
| H  | 0.03717200  | -3.64810700 | -2.07955100 |
| H  | 1.70775100  | -2.49483600 | -0.86111100 |
| C  | -0.34142600 | -0.84451600 | -4.59372100 |
| H  | -0.48563900 | -1.22882200 | -5.61905900 |
| H  | -1.20379800 | -0.19421500 | -4.35270300 |
| H  | 0.56594400  | -0.20852400 | -4.60563600 |

## S<sub>II</sub>

Gibbs free energy before correction = -3295.36256100

Gibbs free energy after correction = -3295.34809494

|   |             |             |            |
|---|-------------|-------------|------------|
| C | 0.34023500  | -2.13426800 | 2.40712700 |
| C | -0.28650500 | -0.91969500 | 3.07670000 |
| H | 0.92497900  | -2.72003900 | 3.13954200 |
| H | -0.45117700 | -2.82537400 | 2.05951700 |

|    |             |             |             |
|----|-------------|-------------|-------------|
| H  | -0.88457900 | -0.34253100 | 2.34427400  |
| H  | -0.99633000 | -1.29007100 | 3.84182000  |
| C  | 0.71017100  | -0.02035300 | 3.73556100  |
| H  | 1.38229600  | -0.50204300 | 4.46423000  |
| C  | 0.82999100  | 1.28935500  | 3.50775900  |
| H  | 0.18036700  | 1.79707500  | 2.77943400  |
| H  | 1.57037300  | 1.90485200  | 4.03235300  |
| C  | 0.67400900  | 3.07050000  | -0.19663800 |
| C  | 2.04677400  | 1.21420900  | -0.41448900 |
| C  | 3.08451400  | 1.98729500  | -0.99764600 |
| C  | 2.85286500  | 3.37595500  | -1.15461100 |
| C  | 1.65960700  | 3.91906700  | -0.73881300 |
| H  | -0.29727900 | 3.47383300  | 0.11582700  |
| C  | 2.21972200  | -0.19017900 | -0.14786700 |
| C  | 4.29148900  | 1.34802300  | -1.38125700 |
| H  | 3.63631200  | 3.99918100  | -1.59991900 |
| H  | 1.45558100  | 4.98921000  | -0.83049000 |
| C  | 4.43909200  | -0.00079500 | -1.15425500 |
| C  | 3.42700300  | -0.77180600 | -0.53647300 |
| H  | 5.08304000  | 1.94261400  | -1.84936700 |
| H  | 5.36873800  | -0.50178200 | -1.44595700 |
| H  | 3.60350100  | -1.82883100 | -0.33099900 |
| N  | 0.85091900  | 1.76860600  | -0.05136500 |
| N  | 1.16119400  | -0.74630900 | 0.55801400  |
| C  | 1.28212500  | -1.90417800 | 1.24109800  |
| O  | 2.08736500  | -2.81517500 | 0.96469300  |
| K  | 0.83996700  | -3.33375200 | -1.28383800 |
| Ni | -0.47345600 | 0.31862900  | 0.15596800  |
| C  | -2.78881000 | -3.43714400 | -1.55473300 |
| C  | -2.92251100 | -3.16211700 | -0.19120500 |
| C  | -2.31845400 | -2.03086800 | 0.36924100  |
| C  | -1.53592700 | -1.14003400 | -0.39052800 |
| C  | -1.45145900 | -1.42748200 | -1.77362500 |
| C  | -2.06088900 | -2.54839200 | -2.35123600 |
| H  | -3.26361300 | -4.32072800 | -1.99481500 |
| H  | -3.50968700 | -3.83545500 | 0.44493500  |
| H  | -2.46551600 | -1.84677000 | 1.44329900  |
| H  | -0.88526100 | -0.75102500 | -2.43440000 |
| H  | -1.96541200 | -2.72872400 | -3.42963700 |
| C  | -1.98720000 | 1.39813700  | -0.10763300 |
| C  | -2.82289500 | 1.71710500  | 0.98123400  |
| C  | -3.89516900 | 2.60794400  | 0.86038200  |

|   |             |            |             |
|---|-------------|------------|-------------|
| C | -4.18119000 | 3.20257500 | -0.36959900 |
| C | -3.38169100 | 2.89137400 | -1.47237800 |
| C | -2.30936000 | 2.00581300 | -1.33714700 |
| H | -2.63780200 | 1.25981500 | 1.96523000  |
| H | -4.51539800 | 2.83658700 | 1.73596000  |
| H | -5.02198300 | 3.89815600 | -0.46995000 |
| H | -3.59518600 | 3.34592200 | -2.44785900 |
| H | -1.69550200 | 1.79087000 | -2.22508400 |

## T<sub>II</sub>

Gibbs free energy before correction = -3295.35068300

Gibbs free energy after correction = -3295.33621694

|   |             |             |             |
|---|-------------|-------------|-------------|
| C | -0.12443400 | 2.52304400  | 1.82018800  |
| C | -0.52995800 | 3.59903200  | 0.81183600  |
| H | 0.13854700  | 2.97238500  | 2.79266700  |
| H | -0.98038000 | 1.84022200  | 1.99317700  |
| H | -0.87015300 | 3.11562900  | -0.12332900 |
| H | -1.39286200 | 4.15785200  | 1.21928500  |
| C | 0.60007600  | 4.53507600  | 0.52415900  |
| H | 0.94131400  | 5.15146400  | 1.37114400  |
| C | 1.23515400  | 4.63063300  | -0.64604300 |
| H | 0.92882600  | 4.02545400  | -1.51106700 |
| H | 2.07558400  | 5.31907100  | -0.79367800 |
| C | -0.33922300 | -1.38177500 | -2.68422900 |
| C | 1.44914300  | -0.30157500 | -1.67387700 |
| C | 2.37601200  | -0.87451200 | -2.58572600 |
| C | 1.85662400  | -1.74372500 | -3.57813400 |
| C | 0.50578900  | -1.99626400 | -3.63179300 |
| H | -1.42182100 | -1.56430000 | -2.69610200 |
| C | 1.88415800  | 0.59050500  | -0.62907500 |
| C | 3.75317700  | -0.56070600 | -2.46711100 |
| H | 2.54710900  | -2.20251000 | -4.29460800 |
| H | 0.07774900  | -2.65888600 | -4.38858600 |
| C | 4.16349600  | 0.29813200  | -1.47083700 |
| C | 3.25142900  | 0.86932100  | -0.55575700 |
| H | 4.46436400  | -1.00594000 | -3.17064000 |
| H | 5.22487900  | 0.55226200  | -1.37610200 |
| H | 3.61598800  | 1.55421700  | 0.21419300  |
| N | 0.11673700  | -0.57449700 | -1.74696900 |
| N | 0.87396900  | 1.11537800  | 0.14664000  |
| C | 1.06755200  | 1.71714000  | 1.34124300  |
| O | 2.08912600  | 1.62871000  | 2.04262800  |

|    |             |             |             |
|----|-------------|-------------|-------------|
| K  | 2.40889400  | -0.97208000 | 2.11777300  |
| Ni | -0.91073100 | 0.14128800  | -0.12651900 |
| C  | 0.18516300  | -3.37147000 | 3.07232700  |
| C  | -0.42472200 | -2.18016400 | 3.47809000  |
| C  | -0.78811700 | -1.21930600 | 2.52582600  |
| C  | -0.55749000 | -1.38597100 | 1.14294400  |
| C  | 0.04808300  | -2.60620200 | 0.77408500  |
| C  | 0.41044900  | -3.58562100 | 1.70955200  |
| H  | 0.47211800  | -4.12918600 | 3.80970500  |
| H  | -0.61783200 | -1.99995300 | 4.54270100  |
| H  | -1.27024900 | -0.29779900 | 2.88964500  |
| H  | 0.25995500  | -2.81471600 | -0.28702100 |
| H  | 0.87783000  | -4.51939600 | 1.37328100  |
| C  | -2.87293100 | 0.13345900  | -0.45154200 |
| C  | -3.65360100 | 1.30851300  | -0.40700900 |
| C  | -5.04013000 | 1.30509900  | -0.59927100 |
| C  | -5.70748000 | 0.10614800  | -0.85272900 |
| C  | -4.97279000 | -1.08105800 | -0.90238500 |
| C  | -3.59031500 | -1.05614200 | -0.69822900 |
| H  | -3.16931100 | 2.27874800  | -0.21455000 |
| H  | -5.60350500 | 2.24549700  | -0.55251300 |
| H  | -6.79255400 | 0.09546000  | -1.00723300 |
| H  | -5.48407300 | -2.03231700 | -1.09634700 |
| H  | -3.04869300 | -2.01532100 | -0.72694500 |

### <sup>S</sup>TS3

Gibbs free energy before correction = -3295.33762200

Gibbs free energy after correction = -3295.32315594

|   |             |             |             |
|---|-------------|-------------|-------------|
| C | -0.20154900 | 2.82206900  | -1.45181300 |
| C | -0.50947800 | 1.91971600  | -2.63796400 |
| H | 0.10696600  | 3.82951600  | -1.78393700 |
| H | -1.11994000 | 2.97721500  | -0.85215800 |
| H | -0.83676300 | 0.93277100  | -2.26173500 |
| H | -1.36318400 | 2.35660000  | -3.19103700 |
| C | 0.65133500  | 1.75349100  | -3.56542000 |
| H | 1.03205100  | 2.67741200  | -4.03027900 |
| C | 1.24725000  | 0.59274900  | -3.84743700 |
| H | 0.89999100  | -0.34678200 | -3.39203700 |
| H | 2.09672000  | 0.52798700  | -4.53766800 |
| C | 0.94675300  | -2.89101100 | 0.31882300  |
| C | 2.24348300  | -0.97378000 | 0.18325100  |
| C | 3.43470100  | -1.69571800 | 0.46608400  |

|    |             |             |             |
|----|-------------|-------------|-------------|
| C  | 3.31222800  | -3.09256500 | 0.67632100  |
| C  | 2.07434800  | -3.68818000 | 0.60209100  |
| H  | -0.05478300 | -3.33883400 | 0.25684300  |
| C  | 2.26609500  | 0.44630900  | -0.05594200 |
| C  | 4.66888200  | -1.00259100 | 0.52720300  |
| H  | 4.21212700  | -3.67809300 | 0.89563300  |
| H  | 1.94901300  | -4.76361700 | 0.75559300  |
| C  | 4.68459000  | 0.35868100  | 0.30799000  |
| C  | 3.50818700  | 1.08491500  | 0.02708700  |
| H  | 5.58457800  | -1.55942300 | 0.75247800  |
| H  | 5.63393000  | 0.90403600  | 0.35353600  |
| H  | 3.56861700  | 2.16297500  | -0.13901400 |
| N  | 1.02553100  | -1.58625600 | 0.11956300  |
| N  | 1.05270400  | 1.00011500  | -0.41229400 |
| C  | 0.87356700  | 2.34071700  | -0.50392800 |
| O  | 1.47526000  | 3.18414500  | 0.18757500  |
| K  | 0.96742100  | 1.90088000  | 2.40257700  |
| Ni | -0.45464200 | -0.31154500 | -0.09868200 |
| C  | -3.44490600 | 2.70450200  | 1.54342400  |
| C  | -3.66764400 | 2.33801500  | 0.20892300  |
| C  | -3.02777400 | 1.23569600  | -0.34508200 |
| C  | -2.11337400 | 0.44092300  | 0.39830300  |
| C  | -1.99181100 | 0.77761400  | 1.78207200  |
| C  | -2.60756700 | 1.90365700  | 2.32785900  |
| H  | -3.94703000 | 3.57655500  | 1.97488700  |
| H  | -4.35102700 | 2.93121400  | -0.41074100 |
| H  | -3.22739600 | 0.97748400  | -1.39360100 |
| H  | -1.42066800 | 0.10985200  | 2.44471200  |
| H  | -2.45988700 | 2.14268800  | 3.38942100  |
| C  | -2.06642000 | -1.27014200 | 0.01148100  |
| C  | -2.36085300 | -1.64910300 | -1.32880100 |
| C  | -2.94601200 | -2.87650600 | -1.63074600 |
| C  | -3.32217800 | -3.75574300 | -0.61031200 |
| C  | -3.09227500 | -3.38483000 | 0.72083300  |
| C  | -2.48283600 | -2.17237800 | 1.02473600  |
| H  | -2.12118900 | -0.95964100 | -2.14963500 |
| H  | -3.12500300 | -3.14676800 | -2.67839200 |
| H  | -3.80428900 | -4.71026000 | -0.84673000 |
| H  | -3.39356200 | -4.05625600 | 1.53397100  |
| H  | -2.32046300 | -1.90932000 | 2.07834600  |

S<sup>III</sup>



Gibbs free energy before correction = -2832.90360100

Gibbs free energy after correction = -2832.88913515

|    |             |             |             |
|----|-------------|-------------|-------------|
| C  | 2.97714600  | -1.26681000 | -0.79216100 |
| C  | 3.53695300  | -0.04735200 | -0.04531500 |
| H  | 3.03515200  | -1.06645500 | -1.87875000 |
| H  | 3.57724300  | -2.16828000 | -0.58340500 |
| H  | 3.35038100  | -0.16714600 | 1.04290400  |
| H  | 4.64343600  | -0.04891900 | -0.15214600 |
| C  | 2.90482100  | 1.22813600  | -0.55307600 |
| H  | 3.21893600  | 1.46514000  | -1.58935500 |
| C  | 2.43668600  | 2.32650600  | 0.26355000  |
| H  | 2.64052100  | 2.30029100  | 1.35169000  |
| H  | 2.53282500  | 3.35432300  | -0.13101900 |
| C  | -1.52735400 | 2.42157900  | 0.31305500  |
| C  | -1.54126600 | 0.19097900  | -0.32392600 |
| C  | -2.95686100 | 0.11860700  | -0.24236400 |
| C  | -3.64829100 | 1.30670600  | 0.11006400  |
| C  | -2.93656000 | 2.45278100  | 0.37757100  |
| H  | -0.93711000 | 3.31260500  | 0.55689800  |
| C  | -0.75560900 | -0.95151800 | -0.69663900 |
| C  | -3.59702300 | -1.11786500 | -0.50413400 |
| H  | -4.74227800 | 1.29040000  | 0.16800700  |
| H  | -3.43967100 | 3.38371500  | 0.65338600  |
| C  | -2.83370100 | -2.22342400 | -0.82062000 |
| C  | -1.42722300 | -2.15316200 | -0.91263800 |
| H  | -4.68896200 | -1.17597200 | -0.44388200 |
| H  | -3.32507100 | -3.18298600 | -1.01521600 |
| H  | -0.85527700 | -3.04616500 | -1.17948100 |
| N  | -0.84724200 | 1.33680200  | -0.02433900 |
| N  | 0.60207400  | -0.71025900 | -0.83790700 |
| C  | 1.53985400  | -1.59825500 | -0.42841600 |
| O  | 1.30694000  | -2.59173700 | 0.28887800  |
| K  | 0.19339900  | -1.24818900 | 2.21162500  |
| Ni | 1.05523300  | 1.13184600  | -0.34162500 |

## Ph<sub>2</sub>

Gibbs free energy before correction = -462.49850200

Gibbs free energy after correction = -462.48403598

|   |             |             |             |
|---|-------------|-------------|-------------|
| C | -0.74067700 | -0.00000100 | 0.00000000  |
| C | -1.46260700 | -1.15384400 | -0.34616000 |
| C | -2.85595100 | -1.15385500 | -0.34689500 |
| C | -3.55945600 | 0.00000100  | 0.00000000  |

|   |             |             |             |
|---|-------------|-------------|-------------|
| C | -2.85595000 | 1.15385600  | 0.34689500  |
| C | -1.46260600 | 1.15384300  | 0.34616100  |
| C | 0.74067700  | -0.00000100 | 0.00000000  |
| C | 1.46260700  | -1.15384400 | 0.34616000  |
| C | 2.85595100  | -1.15385500 | 0.34689500  |
| C | 3.55945600  | 0.00000100  | 0.00000000  |
| C | 2.85595000  | 1.15385600  | -0.34689500 |
| C | 1.46260600  | 1.15384300  | -0.34616000 |
| H | -0.92434500 | -2.06107900 | -0.64222800 |
| H | -3.39737300 | -2.06330200 | -0.62840100 |
| H | -4.65445500 | 0.00000100  | 0.00000000  |
| H | -3.39737100 | 2.06330300  | 0.62840000  |
| H | -0.92434300 | 2.06107800  | 0.64222800  |
| H | 0.92434500  | -2.06107900 | 0.64222800  |
| H | 3.39737300  | -2.06330200 | 0.62840000  |
| H | 4.65445500  | 0.00000100  | 0.00000000  |
| H | 3.39737100  | 2.06330300  | -0.62840100 |
| H | 0.92434300  | 2.06107800  | -0.64222800 |

### **T<sub>IVa</sub>**

Gibbs free energy before correction = -10813.46077900

Gibbs free energy after correction = -10813.44631298

|   |             |             |             |
|---|-------------|-------------|-------------|
| C | -4.50459100 | -1.31056300 | 2.82211100  |
| C | -4.45158600 | -2.57406000 | 1.95181800  |
| H | -5.54046700 | -0.92307100 | 2.81484800  |
| H | -4.23370000 | -1.53930100 | 3.86691600  |
| H | -3.39374100 | -2.89453300 | 1.83829200  |
| H | -4.94744300 | -3.40494800 | 2.49889200  |
| C | -5.07323400 | -2.31436000 | 0.59790200  |
| H | -6.17421200 | -2.20034300 | 0.65817600  |
| C | -4.51936800 | -2.71726000 | -0.67591500 |
| H | -3.60921400 | -3.34967700 | -0.67822400 |
| H | -5.21090600 | -3.01487000 | -1.48496500 |
| C | -3.07984900 | 0.38927600  | -2.65191300 |
| C | -2.96043400 | 1.55661900  | -0.65189100 |
| C | -2.34362200 | 2.67351000  | -1.27493400 |
| C | -2.12456600 | 2.59573400  | -2.67571500 |
| C | -2.49370800 | 1.46116300  | -3.35888700 |
| H | -3.35521900 | -0.53630600 | -3.17114900 |
| C | -3.22689700 | 1.54128600  | 0.75768400  |
| C | -1.98465700 | 3.79005300  | -0.48083800 |
| H | -1.66437100 | 3.44607400  | -3.19216200 |

|    |             |             |             |
|----|-------------|-------------|-------------|
| H  | -2.33368500 | 1.36766000  | -4.43661400 |
| C  | -2.20683800 | 3.75295000  | 0.88186200  |
| C  | -2.80353000 | 2.63765500  | 1.50552500  |
| H  | -1.53115000 | 4.66336300  | -0.96251900 |
| H  | -1.92018600 | 4.61055700  | 1.50101800  |
| H  | -2.97165300 | 2.64359200  | 2.58682400  |
| N  | -3.31535000 | 0.42991800  | -1.35097400 |
| N  | -3.93096100 | 0.44085400  | 1.22046100  |
| C  | -3.55470200 | -0.22399300 | 2.34228800  |
| O  | -2.46420800 | -0.07439100 | 2.92306400  |
| K  | -1.13013300 | -0.79722600 | 0.70123600  |
| Ni | -4.22225100 | -0.87035100 | -0.22282000 |
| Br | 0.00063900  | -1.44354100 | -2.21077500 |
| Br | 4.51036800  | -0.30438400 | -0.79182800 |
| C  | 2.08697100  | -2.86167900 | 1.96528600  |
| C  | 2.86667200  | -3.55085300 | 0.84990800  |
| H  | 1.00856700  | -3.07744700 | 1.84236200  |
| H  | 2.39847600  | -3.26578900 | 2.94002600  |
| H  | 3.92479800  | -3.23113400 | 0.85158900  |
| H  | 2.86879600  | -4.63849900 | 1.05214600  |
| C  | 2.25661700  | -3.34834900 | -0.49336500 |
| H  | 1.17070200  | -3.51853300 | -0.55794000 |
| C  | 2.93878400  | -3.07756900 | -1.62431200 |
| H  | 4.03006600  | -2.97909300 | -1.61359600 |
| H  | 2.43668700  | -3.06016400 | -2.59850200 |
| C  | 1.61175300  | 1.77237200  | -2.14455800 |
| C  | 1.51753700  | 1.62423300  | 0.16988900  |
| C  | 1.37092500  | 3.03220400  | 0.30303000  |
| C  | 1.35708300  | 3.79944700  | -0.88901100 |
| C  | 1.47244500  | 3.17617100  | -2.10855900 |
| H  | 1.70390100  | 1.24292000  | -3.10147100 |
| C  | 1.54983200  | 0.76705700  | 1.31719500  |
| C  | 1.23431400  | 3.59723600  | 1.59246600  |
| H  | 1.25050000  | 4.88756900  | -0.81548300 |
| H  | 1.46090300  | 3.74114400  | -3.04422400 |
| C  | 1.21763200  | 2.76600700  | 2.69192200  |
| C  | 1.36559900  | 1.36772100  | 2.56283400  |
| H  | 1.12450100  | 4.68233100  | 1.69087000  |
| H  | 1.08740700  | 3.18702600  | 3.69420400  |
| H  | 1.34596800  | 0.74754300  | 3.46277200  |
| N  | 1.64204400  | 1.04011900  | -1.05179300 |
| N  | 1.66507400  | -0.60942100 | 1.09155600  |

|    |            |             |             |
|----|------------|-------------|-------------|
| C  | 2.31215800 | -1.36803700 | 2.02828700  |
| O  | 3.07054100 | -0.91418100 | 2.89306600  |
| K  | 4.66238600 | 0.98899100  | 2.12146200  |
| Ni | 2.07281900 | -0.95028500 | -0.91777600 |

**T<sub>IVb</sub>**

Gibbs free energy before correction = -10813.49219100

Gibbs free energy after correction = -10813.47772498

|    |             |             |             |
|----|-------------|-------------|-------------|
| C  | -4.93885500 | -2.03792800 | 1.43512600  |
| C  | -4.87675900 | -2.56554000 | 0.00320100  |
| H  | -5.91005400 | -1.53051200 | 1.59518800  |
| H  | -4.88687400 | -2.87045400 | 2.15395100  |
| H  | -3.84467500 | -2.88694400 | -0.23531600 |
| H  | -5.51159100 | -3.47037400 | -0.05768400 |
| C  | -5.34789700 | -1.57791300 | -1.02249400 |
| H  | -6.41401700 | -1.29877300 | -0.95800200 |
| C  | -4.64515700 | -1.28075200 | -2.18457000 |
| H  | -3.68420500 | -1.77094700 | -2.40110000 |
| H  | -5.14961500 | -0.78903900 | -3.02987300 |
| C  | -3.30834500 | 2.74203500  | -1.85110200 |
| C  | -2.73598600 | 2.08216500  | 0.30569100  |
| C  | -1.97871600 | 3.26587700  | 0.51151700  |
| C  | -1.92102100 | 4.19889800  | -0.55261900 |
| C  | -2.58599000 | 3.94460700  | -1.72940700 |
| H  | -3.84775000 | 2.50475700  | -2.77583100 |
| C  | -2.89428500 | 1.09872400  | 1.34798000  |
| C  | -1.33034900 | 3.47362500  | 1.75399500  |
| H  | -1.34385500 | 5.12091500  | -0.41454700 |
| H  | -2.56215600 | 4.64829200  | -2.56565400 |
| C  | -1.47403600 | 2.53127900  | 2.74597200  |
| C  | -2.25162100 | 1.36472600  | 2.55990700  |
| H  | -0.74125600 | 4.38450500  | 1.90335900  |
| H  | -0.99085700 | 2.68414200  | 3.71753100  |
| H  | -2.37962700 | 0.67223100  | 3.39418200  |
| N  | -3.38047600 | 1.85442600  | -0.87505900 |
| N  | -3.72667500 | 0.03269800  | 1.03416500  |
| C  | -3.82992300 | -1.07411200 | 1.80900500  |
| O  | -3.09647400 | -1.34584500 | 2.77375600  |
| K  | -0.58513900 | -1.28810100 | 2.05173400  |
| Ni | -4.36750900 | 0.15113600  | -0.82780300 |
| C  | 3.16904100  | -2.84911700 | 1.74622100  |
| C  | 3.50523900  | -3.34801700 | 0.33590800  |
| H  | 2.19180200  | -3.26414800 | 2.06051200  |
| H  | 3.92616100  | -3.19056400 | 2.46981600  |
| H  | 4.29786800  | -2.70697000 | -0.09805000 |
| H  | 3.93184800  | -4.36685200 | 0.40941100  |
| C  | 2.31544900  | -3.37101300 | -0.58285600 |

|    |             |             |             |
|----|-------------|-------------|-------------|
| H  | 1.55372500  | -4.13172600 | -0.34324600 |
| C  | 2.29900800  | -2.78231100 | -1.84362500 |
| H  | 3.18185700  | -2.23105100 | -2.20498500 |
| H  | 1.56777500  | -3.09986100 | -2.59964600 |
| C  | 0.50203600  | 0.76782000  | -2.14923700 |
| C  | 1.48034400  | 1.19477100  | -0.09360200 |
| C  | 1.47045100  | 2.59701100  | -0.32332200 |
| C  | 0.96994600  | 3.04671100  | -1.56975400 |
| C  | 0.48813300  | 2.13752800  | -2.48283200 |
| H  | 0.09790000  | 0.01543600  | -2.83897200 |
| C  | 2.03367000  | 0.64737400  | 1.11403400  |
| C  | 1.95445200  | 3.47085200  | 0.68235300  |
| H  | 0.96912100  | 4.12156100  | -1.78537000 |
| H  | 0.08815800  | 2.45632600  | -3.44960800 |
| C  | 2.39876000  | 2.94477700  | 1.87633900  |
| C  | 2.43567500  | 1.54809900  | 2.09809700  |
| H  | 1.94421500  | 4.55134500  | 0.50000900  |
| H  | 2.74175200  | 3.61307500  | 2.67407600  |
| H  | 2.81466400  | 1.16706600  | 3.05016300  |
| N  | 0.98886900  | 0.31902800  | -1.01049300 |
| N  | 2.09374900  | -0.74399900 | 1.19272000  |
| C  | 3.15936400  | -1.33528600 | 1.78969900  |
| O  | 4.13894700  | -0.74633400 | 2.27389200  |
| K  | 5.38030200  | 1.12441500  | 0.98183100  |
| Ni | 1.33823700  | -1.60224400 | -0.52922600 |
| Br | 4.70465300  | 0.29584800  | -1.83925400 |
| Br | -1.07244300 | -2.38434300 | -0.87387500 |

### **<sup>T</sup>TS4**

Gibbs free energy before correction = -10813.44728300

Gibbs free energy after correction = -10813.43281698

|   |             |             |             |
|---|-------------|-------------|-------------|
| C | -5.34676700 | -1.47358000 | 1.59257400  |
| C | -5.34047500 | -2.14508100 | 0.22356500  |
| H | -6.23067400 | -0.81114900 | 1.66819400  |
| H | -5.42985300 | -2.22380200 | 2.39371700  |
| H | -4.39355700 | -2.69733900 | 0.07232900  |
| H | -6.14495800 | -2.90602300 | 0.20229500  |
| C | -5.54904700 | -1.19470800 | -0.91705900 |
| H | -6.47241000 | -0.59323500 | -0.87519900 |
| C | -4.84754800 | -1.27992000 | -2.10828700 |
| H | -4.09096000 | -2.05907300 | -2.27077000 |
| H | -5.21477900 | -0.75827400 | -3.00394500 |

|    |             |             |             |
|----|-------------|-------------|-------------|
| C  | -2.33149200 | 2.27680200  | -2.12314300 |
| C  | -2.37872600 | 2.05383300  | 0.18753800  |
| C  | -1.42422300 | 3.09336600  | 0.35575200  |
| C  | -0.92560200 | 3.71031800  | -0.81752200 |
| C  | -1.36710600 | 3.30133000  | -2.05383400 |
| H  | -2.71295000 | 1.93238500  | -3.09232300 |
| C  | -2.91734000 | 1.34002300  | 1.31366000  |
| C  | -1.01309100 | 3.45721700  | 1.66002000  |
| H  | -0.18447000 | 4.51183300  | -0.71787800 |
| H  | -0.98986800 | 3.75538500  | -2.97391300 |
| C  | -1.55633100 | 2.79513700  | 2.73862700  |
| C  | -2.49026700 | 1.74901600  | 2.58020100  |
| H  | -0.26694500 | 4.24862700  | 1.78558100  |
| H  | -1.25584100 | 3.07522600  | 3.75403400  |
| H  | -2.88851400 | 1.24287700  | 3.46187600  |
| N  | -2.82318600 | 1.69252000  | -1.04886400 |
| N  | -3.82949000 | 0.34193700  | 1.01620800  |
| C  | -4.11733200 | -0.64377400 | 1.90431200  |
| O  | -3.44483500 | -0.91465600 | 2.90929500  |
| K  | -1.00445800 | -1.02595200 | 1.89185000  |
| Ni | -4.04973000 | 0.15119100  | -0.95582400 |
| C  | 2.28361200  | -2.79916500 | 2.07181500  |
| C  | 2.62047400  | -3.51013300 | 0.75398700  |
| H  | 1.22561800  | -3.00802900 | 2.33094100  |
| H  | 2.90205900  | -3.18818200 | 2.89596500  |
| H  | 3.55821900  | -3.09254800 | 0.33860000  |
| H  | 2.82024500  | -4.57793200 | 0.96902900  |
| C  | 1.52106000  | -3.39962000 | -0.26853700 |
| H  | 0.56389400  | -3.86832900 | 0.02146500  |
| C  | 1.72557100  | -3.10502300 | -1.61474500 |
| H  | 2.74259100  | -2.90771300 | -1.98478600 |
| H  | 0.96243300  | -3.36576200 | -2.35831200 |
| C  | 1.34711100  | 0.81964600  | -2.51102300 |
| C  | 1.82506400  | 1.27730800  | -0.29235600 |
| C  | 2.21726100  | 2.60866500  | -0.59932600 |
| C  | 2.20425100  | 2.98952900  | -1.96405600 |
| C  | 1.77821200  | 2.10080100  | -2.92014700 |
| H  | 0.96787500  | 0.08903100  | -3.23697400 |
| C  | 1.93321400  | 0.77011000  | 1.04953400  |
| C  | 2.62469400  | 3.47502400  | 0.44632700  |
| H  | 2.53859800  | 3.99797500  | -2.23611900 |
| H  | 1.76737300  | 2.36396800  | -3.98130500 |

|    |             |             |             |
|----|-------------|-------------|-------------|
| C  | 2.63142600  | 3.01064500  | 1.74468400  |
| C  | 2.29840000  | 1.67108400  | 2.04670600  |
| H  | 2.92188400  | 4.50210300  | 0.20545000  |
| H  | 2.91703300  | 3.68221400  | 2.56249700  |
| H  | 2.35723500  | 1.31846000  | 3.08008300  |
| N  | 1.38299400  | 0.42962700  | -1.25715400 |
| N  | 1.68106600  | -0.58621100 | 1.23987500  |
| C  | 2.54099900  | -1.30324700 | 2.00779000  |
| O  | 3.53996100  | -0.85094400 | 2.59003600  |
| K  | 5.33550900  | 0.41617500  | 1.31105200  |
| Ni | 1.14541300  | -1.46296200 | -0.60251700 |
| Br | 4.60771100  | -0.71243100 | -1.31469800 |
| Br | -1.35785600 | -1.55160500 | -1.16529000 |

### T<sub>IVc</sub>

Gibbs free energy before correction = -10813.49521400

Gibbs free energy after correction = -10813.48074798

|   |             |             |             |
|---|-------------|-------------|-------------|
| C | -4.36643200 | -1.75329400 | 2.59568700  |
| C | -4.71352700 | -2.61294200 | 1.38537700  |
| H | -5.26923400 | -1.18904300 | 2.90220400  |
| H | -4.08310300 | -2.39127400 | 3.44759100  |
| H | -3.81890300 | -3.17146400 | 1.04588200  |
| H | -5.44039500 | -3.38270500 | 1.71436900  |
| C | -5.29343100 | -1.84538300 | 0.23124100  |
| H | -6.11666200 | -1.15683700 | 0.48060200  |
| C | -5.06362700 | -2.16493100 | -1.09702000 |
| H | -4.45770000 | -3.03936400 | -1.36904700 |
| H | -5.71717200 | -1.76507500 | -1.88424900 |
| C | -3.36312300 | 1.70556800  | -2.26577800 |
| C | -2.77773900 | 1.93167000  | -0.03466700 |
| C | -2.27629700 | 3.24462500  | -0.24492000 |
| C | -2.38311100 | 3.77616100  | -1.55487300 |
| C | -2.92772000 | 3.01389700  | -2.56212600 |
| H | -3.76737200 | 1.05626800  | -3.05273100 |
| C | -2.75352200 | 1.31787600  | 1.26845900  |
| C | -1.68766300 | 3.94345700  | 0.83809700  |
| H | -2.01842700 | 4.79210200  | -1.74682200 |
| H | -3.01683400 | 3.39557200  | -3.58294100 |
| C | -1.61522600 | 3.33110600  | 2.07136700  |
| C | -2.13218600 | 2.03636700  | 2.29533300  |
| H | -1.28895000 | 4.95068800  | 0.67220400  |
| H | -1.14626800 | 3.85695200  | 2.91096600  |



|    |             |             |             |
|----|-------------|-------------|-------------|
| H  | -2.06598300 | 1.59363300  | 3.29161500  |
| N  | -3.30558400 | 1.19652300  | -1.05102600 |
| N  | -3.39632500 | 0.09844300  | 1.35196800  |
| C  | -3.25647600 | -0.73452200 | 2.41337000  |
| O  | -2.30467700 | -0.71925100 | 3.21068200  |
| K  | -0.55775500 | -0.73482000 | 1.13781700  |
| Ni | -3.79885300 | -0.68381600 | -0.50836400 |
| Br | -1.73543500 | -1.64437500 | -1.65703800 |
| Br | 4.20484500  | -0.56322000 | -1.91225300 |
| C  | 2.74693100  | -2.66039800 | 2.23930700  |
| C  | 2.83210400  | -3.47899900 | 0.95277300  |
| H  | 1.72120400  | -2.73856200 | 2.65057900  |
| H  | 3.43152800  | -3.07578900 | 2.99509600  |
| H  | 3.82906100  | -3.34700500 | 0.48929000  |
| H  | 2.75883400  | -4.55138700 | 1.22036200  |
| C  | 1.76606900  | -3.14984800 | -0.05414200 |
| H  | 0.72584100  | -3.22889300 | 0.30477500  |
| C  | 1.98300800  | -3.09991300 | -1.41953200 |
| H  | 2.96718200  | -3.33448000 | -1.84519300 |
| H  | 1.12583800  | -3.11570400 | -2.10740700 |
| C  | 0.84374700  | 1.16010800  | -2.03527600 |
| C  | 1.72916100  | 1.51097300  | 0.08032400  |
| C  | 1.62490500  | 2.92165400  | -0.05113500 |
| C  | 1.10152300  | 3.42057200  | -1.27027700 |
| C  | 0.70714700  | 2.54628700  | -2.25639300 |
| H  | 0.53743100  | 0.43432700  | -2.79921200 |
| C  | 2.25342200  | 0.90813400  | 1.27721200  |
| C  | 2.04135700  | 3.75105200  | 1.01931800  |
| H  | 1.01317900  | 4.50511500  | -1.40536900 |
| H  | 0.29528400  | 2.90347900  | -3.20416700 |
| C  | 2.52694700  | 3.17006700  | 2.17099100  |
| C  | 2.63523000  | 1.76794800  | 2.30866800  |
| H  | 1.96229500  | 4.83844800  | 0.91377900  |
| H  | 2.84146400  | 3.80233400  | 3.00833500  |
| H  | 3.02410700  | 1.34844700  | 3.23992300  |
| N  | 1.34428300  | 0.66679000  | -0.91822200 |
| N  | 2.24540700  | -0.47954400 | 1.29919000  |
| C  | 3.09434500  | -1.19135800 | 2.08125900  |
| O  | 4.11866600  | -0.74272200 | 2.62158300  |
| K  | 5.37480700  | 0.58138600  | 0.74795200  |
| Ni | 2.07168000  | -1.21204200 | -0.66742800 |

#### IV

Gibbs free energy before correction = -5406.74718000

Gibbs free energy after correction = -5406.73271382

|    |             |             |             |
|----|-------------|-------------|-------------|
| Br | -1.26931400 | -1.56602400 | 1.58736500  |
| C  | -2.29983100 | 2.32337600  | -1.12550000 |
| C  | -3.16402000 | 1.06635100  | -1.15595600 |
| H  | -2.05692000 | 2.61323800  | -2.16660000 |
| H  | -2.86124000 | 3.15998200  | -0.68056600 |
| H  | -3.41510000 | 0.75260400  | -0.12403100 |
| H  | -4.12874800 | 1.32902100  | -1.63505700 |
| C  | -2.54026800 | -0.08651800 | -1.89097400 |
| H  | -2.14223200 | 0.14510100  | -2.89206800 |
| C  | -2.69250900 | -1.41455300 | -1.52289300 |
| H  | -3.33112800 | -1.69254700 | -0.67379200 |
| H  | -2.46563600 | -2.21546900 | -2.23983300 |
| C  | 1.53099000  | -2.36909400 | -0.79702900 |
| C  | 1.82322200  | -0.08308100 | -0.55488800 |
| C  | 3.22776100  | -0.22607100 | -0.38788300 |
| C  | 3.75719900  | -1.53962000 | -0.45984800 |
| C  | 2.91507700  | -2.60749800 | -0.66585900 |
| H  | 0.82876500  | -3.20170900 | -0.92974400 |
| C  | 1.19007300  | 1.20894600  | -0.50665700 |
| C  | 4.01847000  | 0.92583200  | -0.15280700 |
| H  | 4.83717900  | -1.68416200 | -0.34338100 |
| H  | 3.29476200  | -3.63133600 | -0.72095300 |
| C  | 3.40518700  | 2.15925000  | -0.08680100 |
| C  | 2.01164000  | 2.31001000  | -0.25106800 |
| H  | 5.09996500  | 0.81416900  | -0.02200700 |
| H  | 4.00801600  | 3.05511700  | 0.09889600  |
| H  | 1.56791800  | 3.30671800  | -0.19105900 |
| N  | 1.01212900  | -1.15819800 | -0.75417600 |
| N  | -0.16366200 | 1.21769800  | -0.77666900 |
| C  | -0.98190500 | 2.22095800  | -0.37931100 |
| O  | -0.73305200 | 3.02297600  | 0.53801500  |
| K  | -0.07852600 | 1.21855900  | 2.36431000  |
| Ni | -0.94996300 | -0.67937700 | -0.78295900 |

#### Va

Gibbs free energy before correction = -3355.53121800

Gibbs free energy after correction = -3355.51675176

|   |            |            |             |
|---|------------|------------|-------------|
| C | 0.31611500 | 3.11894600 | 0.72333400  |
| C | 0.71874700 | 3.63207700 | -0.65314000 |

|    |             |             |             |
|----|-------------|-------------|-------------|
| H  | 0.51973800  | 3.87347500  | 1.50360400  |
| H  | -0.77495500 | 2.94015700  | 0.77595700  |
| H  | 0.52725400  | 2.84641600  | -1.40409300 |
| H  | 0.07435100  | 4.49409800  | -0.90979200 |
| C  | 2.15376300  | 4.05082700  | -0.69391700 |
| H  | 2.42889400  | 4.88380500  | -0.02694600 |
| C  | 3.10042900  | 3.48222100  | -1.44365700 |
| H  | 2.86582000  | 2.64327400  | -2.11429700 |
| H  | 4.14031100  | 3.82943300  | -1.42564800 |
| C  | 0.82189000  | -2.43236500 | -1.80764200 |
| C  | 2.17387900  | -1.19141700 | -0.38811000 |
| C  | 3.16582700  | -2.20769000 | -0.35096700 |
| C  | 2.92109800  | -3.37709900 | -1.11604700 |
| C  | 1.75427900  | -3.49032600 | -1.83655600 |
| H  | -0.12387200 | -2.48905000 | -2.36000300 |
| C  | 2.31504700  | 0.02268900  | 0.36535100  |
| C  | 4.32223300  | -2.01358400 | 0.44287500  |
| H  | 3.66755000  | -4.17933400 | -1.11554100 |
| H  | 1.53668100  | -4.38285500 | -2.42982300 |
| C  | 4.45117100  | -0.84723300 | 1.17045800  |
| C  | 3.46429900  | 0.15886600  | 1.14643700  |
| H  | 5.08899300  | -2.79496300 | 0.47152300  |
| H  | 5.34216600  | -0.69056500 | 1.78857700  |
| H  | 3.60516000  | 1.06715600  | 1.73942700  |
| N  | 1.02658900  | -1.32348300 | -1.11612200 |
| N  | 1.32182000  | 0.96498100  | 0.18877000  |
| C  | 1.00435500  | 1.84485500  | 1.16660400  |
| O  | 1.15793000  | 1.63757800  | 2.38414400  |
| K  | -0.10239300 | -0.68374400 | 2.25601900  |
| Ni | -0.13214600 | 0.25939800  | -1.05009600 |
| B  | -2.64112600 | 0.31173800  | -1.24633000 |
| C  | -2.81750200 | -0.29167200 | 0.26166500  |
| C  | -2.71678100 | -1.66614400 | 0.54489400  |
| C  | -3.10068400 | 0.55654500  | 1.34816300  |
| C  | -2.88962000 | -2.17086200 | 1.83765800  |
| H  | -2.49117400 | -2.35930900 | -0.27600500 |
| C  | -3.27222400 | 0.06951900  | 2.64769600  |
| C  | -3.16559100 | -1.30223200 | 2.89911600  |
| H  | -2.80843100 | -3.24853900 | 2.02229600  |
| H  | -3.49298400 | 0.76060300  | 3.46920400  |
| H  | -3.30331600 | -1.69205000 | 3.91365500  |
| O  | -1.74364200 | 1.50842100  | -1.24239500 |

|   |             |             |             |
|---|-------------|-------------|-------------|
| H | -2.03523700 | 2.20638700  | -0.64383400 |
| O | -1.85585500 | -0.66661400 | -2.03955900 |
| H | -1.91479300 | -0.39729800 | -2.96626900 |
| O | -3.88833800 | 0.68588700  | -1.86951900 |
| H | -3.20287600 | 1.63878600  | 1.17969000  |
| C | -4.88836700 | -0.26916500 | -1.92308500 |
| H | -5.73832700 | 0.10275600  | -2.52546700 |
| H | -4.55639300 | -1.22233900 | -2.39082400 |
| H | -5.29718300 | -0.53393200 | -0.92210000 |

## TS5

Gibbs free energy before correction = -3355.50806200

Gibbs free energy after correction = -3355.49359576

|   |             |             |             |
|---|-------------|-------------|-------------|
| C | 0.62980800  | 3.10787800  | 0.58133900  |
| C | 1.18102200  | 3.65024500  | -0.73323400 |
| H | 0.77362300  | 3.83431300  | 1.39971300  |
| H | -0.46192600 | 2.94905200  | 0.49784600  |
| H | 0.98509600  | 2.92601500  | -1.54273500 |
| H | 0.63181400  | 4.57621500  | -0.98773700 |
| C | 2.64442100  | 3.94252400  | -0.63788700 |
| H | 2.92991400  | 4.72641900  | 0.08196200  |
| C | 3.60204200  | 3.30920800  | -1.31886300 |
| H | 3.35809900  | 2.51662300  | -2.04026500 |
| H | 4.66257900  | 3.55756100  | -1.19303100 |
| C | 0.21023700  | -2.55165800 | -1.59149000 |
| C | 1.87477700  | -1.41881500 | -0.44603000 |
| C | 2.75271200  | -2.53584500 | -0.50388000 |
| C | 2.28410100  | -3.69164400 | -1.17982800 |
| C | 1.02374000  | -3.69605500 | -1.73035400 |
| H | -0.80888800 | -2.53868100 | -1.99975700 |
| C | 2.27290100  | -0.19002900 | 0.18269000  |
| C | 4.02544600  | -2.44650800 | 0.11018000  |
| H | 2.93855200  | -4.56743200 | -1.25320800 |
| H | 0.63658700  | -4.56952300 | -2.26215600 |
| C | 4.38502700  | -1.27706200 | 0.75038900  |
| C | 3.52785000  | -0.15938500 | 0.79383100  |
| H | 4.69913900  | -3.30902700 | 0.07133100  |
| H | 5.36616400  | -1.20329800 | 1.23243700  |
| H | 3.85693600  | 0.75677000  | 1.29316600  |
| N | 0.61389700  | -1.45685100 | -0.96999500 |
| N | 1.39787900  | 0.86788200  | 0.05537200  |
| C | 1.25939000  | 1.80236300  | 1.02647800  |

|    |             |             |             |
|----|-------------|-------------|-------------|
| O  | 1.52934800  | 1.62669700  | 2.22745800  |
| K  | 0.09609100  | -0.57737600 | 2.55362400  |
| Ni | -0.40828100 | 0.25300400  | -0.62108700 |
| B  | -2.49104000 | 0.61712100  | -1.74318200 |
| C  | -2.10178500 | -0.20617900 | 0.30324200  |
| C  | -2.40650300 | -1.55233500 | 0.60716000  |
| C  | -2.52363500 | 0.73104800  | 1.28049400  |
| C  | -3.02885300 | -1.94581600 | 1.79882000  |
| H  | -2.13516700 | -2.33944700 | -0.11204300 |
| C  | -3.14261200 | 0.36271700  | 2.47784600  |
| C  | -3.39065600 | -0.98855100 | 2.75096300  |
| H  | -3.23324500 | -3.00706900 | 1.98707100  |
| H  | -3.43490700 | 1.13003100  | 3.20541000  |
| H  | -3.87439300 | -1.28792700 | 3.68732700  |
| O  | -1.56106400 | 1.69638700  | -1.85347900 |
| H  | -1.92317700 | 2.49072500  | -1.43646100 |
| O  | -2.34275800 | -0.44405900 | -2.64057600 |
| H  | -1.43742600 | -0.48426000 | -2.97211700 |
| O  | -3.78607500 | 1.02924800  | -1.44216200 |
| H  | -2.36669400 | 1.80548200  | 1.09531600  |
| C  | -4.82752800 | 0.11001700  | -1.36683300 |
| H  | -5.79109300 | 0.64809800  | -1.35094700 |
| H  | -4.84475100 | -0.58566900 | -2.22728000 |
| H  | -4.77495700 | -0.50466200 | -0.44410300 |

## V

Gibbs free energy before correction = -3064.13487900

Gibbs free energy after correction = -3064.12041282

|   |             |             |             |
|---|-------------|-------------|-------------|
| C | 2.04722100  | -2.88112100 | 0.53992600  |
| C | 2.87945400  | -2.22199300 | -0.55818900 |
| H | 1.56067800  | -3.78414000 | 0.12210000  |
| H | 2.70124800  | -3.21525700 | 1.36124400  |
| H | 3.38905400  | -1.32723600 | -0.15214100 |
| H | 3.69061600  | -2.92706400 | -0.83310800 |
| C | 2.09655600  | -1.84160700 | -1.78687700 |
| H | 1.51583300  | -2.65655800 | -2.24916200 |
| C | 2.31364400  | -0.67707300 | -2.52114300 |
| H | 3.13464200  | 0.00479700  | -2.25554800 |
| H | 1.96594000  | -0.60931300 | -3.56140800 |
| C | -1.88005400 | 0.63104100  | -2.40101900 |
| C | -1.96425600 | -0.42087700 | -0.34048000 |
| C | -3.31886500 | -0.03779200 | -0.14028100 |

|    |             |             |             |
|----|-------------|-------------|-------------|
| C  | -3.94079300 | 0.70681100  | -1.17496200 |
| C  | -3.22877600 | 1.03468100  | -2.30517000 |
| H  | -1.27522900 | 0.90996800  | -3.27423200 |
| C  | -1.25345300 | -1.19587400 | 0.64712200  |
| C  | -3.97569800 | -0.40319100 | 1.06146300  |
| H  | -4.98634800 | 1.01220400  | -1.05480400 |
| H  | -3.68239500 | 1.60622800  | -3.11960000 |
| C  | -3.28421200 | -1.12307800 | 2.01276200  |
| C  | -1.94113400 | -1.51353700 | 1.82378600  |
| H  | -5.01765800 | -0.10253800 | 1.21406900  |
| H  | -3.78322200 | -1.40672200 | 2.94622700  |
| H  | -1.43295000 | -2.09088700 | 2.60060200  |
| N  | -1.27603100 | -0.06854800 | -1.46041200 |
| N  | 0.01285100  | -1.58830400 | 0.28227000  |
| C  | 0.94547500  | -2.03496700 | 1.15500600  |
| O  | 0.95974300  | -1.79572300 | 2.37619300  |
| K  | 0.49493000  | 0.78984600  | 2.36826500  |
| Ni | 0.75693100  | -0.42098800 | -1.24666500 |
| C  | 1.13937600  | 1.44067700  | -0.58328300 |
| C  | 2.41145700  | 1.66800900  | -0.00047000 |
| C  | 2.71469000  | 2.77597500  | 0.80147900  |
| C  | 1.73898400  | 3.74497000  | 1.05339500  |
| C  | 0.47465300  | 3.58440000  | 0.47909300  |
| C  | 0.19484700  | 2.45957900  | -0.30837300 |
| H  | 3.22026000  | 0.93893500  | -0.16993200 |
| H  | 3.71781300  | 2.88456300  | 1.23288000  |
| H  | 1.96350800  | 4.61663100  | 1.67816200  |
| H  | -0.30321200 | 4.33861200  | 0.65361200  |
| H  | -0.82670200 | 2.38191200  | -0.71461700 |

## TS6

Gibbs free energy before correction = -3064.10554800

Gibbs free energy after correction = -3064.09108182

|   |             |             |             |
|---|-------------|-------------|-------------|
| C | -0.92942200 | -3.49967100 | 0.15700900  |
| C | 0.58481900  | -3.47572900 | 0.16651400  |
| H | -1.27970600 | -4.02373700 | -0.75520200 |
| H | -1.33232300 | -4.07643400 | 1.00502600  |
| H | 0.96019500  | -3.13084400 | 1.14978200  |
| H | 0.96125200  | -4.51229000 | 0.05079800  |
| C | 0.92619900  | 2.21802100  | 0.35465400  |
| C | -1.06550300 | 1.23656800  | -0.38843600 |
| C | -1.73582900 | 2.50215900  | -0.42830500 |

|    |             |             |             |
|----|-------------|-------------|-------------|
| C  | -0.99401900 | 3.64680900  | -0.02858600 |
| C  | 0.34124100  | 3.46856400  | 0.38753900  |
| H  | 1.96536200  | 2.08360400  | 0.66858600  |
| C  | -1.76535100 | 0.05014600  | -0.68631400 |
| C  | -3.08359600 | 2.52720500  | -0.86449700 |
| H  | -1.46970400 | 4.63390000  | -0.03091900 |
| H  | 0.93710400  | 4.32033400  | 0.73303300  |
| C  | -3.72514000 | 1.35401300  | -1.28098400 |
| C  | -3.07980200 | 0.11839600  | -1.19618200 |
| H  | -3.60087500 | 3.49301200  | -0.91473800 |
| H  | -4.74787800 | 1.40399300  | -1.67334300 |
| H  | -3.59104500 | -0.80034600 | -1.50101700 |
| N  | 0.26353800  | 1.09698500  | -0.06068300 |
| N  | -1.03190200 | -1.13189500 | -0.47660500 |
| C  | -1.64189800 | -2.16438400 | 0.13935200  |
| O  | -2.78119200 | -2.10827500 | 0.64791700  |
| K  | -3.85077700 | -0.01070300 | 1.64854600  |
| Ni | 0.86484000  | -0.75140400 | -0.39181600 |
| C  | 2.70817200  | -0.23409200 | -0.07442700 |
| C  | 3.40161700  | 0.58657800  | -0.97790400 |
| C  | 4.43935800  | 1.41431900  | -0.54874600 |
| C  | 4.81401900  | 1.43458100  | 0.79659000  |
| C  | 4.14308300  | 0.61197300  | 1.70588000  |
| C  | 3.11182200  | -0.22099000 | 1.27249900  |
| H  | 3.12253300  | 0.57605300  | -2.03995000 |
| H  | 4.96235800  | 2.04911400  | -1.27329400 |
| H  | 5.63200000  | 2.08004300  | 1.13398700  |
| H  | 4.43327200  | 0.61188800  | 2.76288700  |
| H  | 2.61331600  | -0.88387400 | 1.99319400  |
| C  | 1.14471200  | -2.59625800 | -0.91164300 |
| H  | 0.70229800  | -2.71855700 | -1.91206500 |
| C  | 2.44468900  | -2.05430000 | -0.82321600 |
| H  | 2.97519600  | -1.84713700 | -1.75994900 |
| H  | 3.09893200  | -2.44894100 | -0.03541700 |

## VI

Gibbs free energy before correction = -3064.14016700

Gibbs free energy after correction = -3064.12570082

|   |             |             |             |
|---|-------------|-------------|-------------|
| C | -0.40156300 | -3.11644900 | -0.93076600 |
| C | 0.82725900  | -3.06009500 | -0.01712800 |
| H | -0.07443800 | -2.93016300 | -1.97223400 |
| H | -0.85963200 | -4.11921500 | -0.90135800 |

|    |             |             |             |
|----|-------------|-------------|-------------|
| H  | 0.48144800  | -3.05954700 | 1.03978300  |
| H  | 1.37287500  | -4.02797500 | -0.12956300 |
| C  | 0.33065000  | 2.66363400  | 0.32722800  |
| C  | -1.55713500 | 1.46099100  | -0.28092100 |
| C  | -2.38257800 | 2.61310500  | -0.18872500 |
| C  | -1.76423400 | 3.83033000  | 0.19630700  |
| C  | -0.41311000 | 3.85405000  | 0.45215100  |
| H  | 1.41108900  | 2.66147800  | 0.51731500  |
| C  | -2.09650200 | 0.18351700  | -0.66527400 |
| C  | -3.76427900 | 2.50463300  | -0.48754000 |
| H  | -2.37517700 | 4.73612800  | 0.27824500  |
| H  | 0.09616300  | 4.77647100  | 0.74486000  |
| C  | -4.27453600 | 1.28582600  | -0.88319000 |
| C  | -3.46047200 | 0.13527800  | -0.97272100 |
| H  | -4.39756500 | 3.39505400  | -0.41416100 |
| H  | -5.33578600 | 1.19938500  | -1.14318700 |
| H  | -3.89422400 | -0.80276200 | -1.33462400 |
| N  | -0.21395800 | 1.50675800  | -0.01965700 |
| N  | -1.17577300 | -0.83288200 | -0.76538100 |
| C  | -1.49363000 | -2.12715500 | -0.58449900 |
| O  | -2.57777800 | -2.54875100 | -0.12614900 |
| K  | -4.25807400 | -1.66810300 | 1.49529100  |
| Ni | 0.67330200  | -0.21086300 | -0.20753100 |
| C  | 3.84280500  | -0.70903600 | 0.46329800  |
| C  | 5.06539100  | -0.84572100 | -0.20172900 |
| C  | 5.87464100  | 0.26505100  | -0.46210600 |
| C  | 5.47238400  | 1.53550600  | -0.05351900 |
| C  | 4.25309000  | 1.68883900  | 0.61377100  |
| C  | 3.44613400  | 0.57951200  | 0.85858500  |
| H  | 5.38884900  | -1.84449200 | -0.52211900 |
| H  | 6.82785100  | 0.13337700  | -0.98628700 |
| H  | 6.10674900  | 2.40655800  | -0.25051100 |
| H  | 3.93322500  | 2.68309700  | 0.94728600  |
| H  | 2.48101100  | 0.69690500  | 1.37397100  |
| C  | 1.73349600  | -1.86106100 | -0.26866500 |
| H  | 2.15300800  | -1.98690700 | -1.29781000 |
| C  | 2.92923700  | -1.87755300 | 0.68722800  |
| H  | 3.52548700  | -2.81743000 | 0.61112300  |
| H  | 2.55808200  | -1.84814400 | 1.73336500  |

***n*-BuI**

Gibbs free energy before correction = -455.29395900



Gibbs free energy after correction = -455.27949273

|   |             |             |             |
|---|-------------|-------------|-------------|
| C | -0.48337300 | 0.82158100  | 0.00010300  |
| C | -1.60213500 | -0.19268000 | 0.00034000  |
| H | -0.50239600 | 1.46551900  | -0.89335600 |
| H | -0.50215100 | 1.46564300  | 0.89347600  |
| C | -2.96616700 | 0.48558500  | -0.00012700 |
| H | -1.51441200 | -0.85259300 | -0.88403500 |
| H | -1.51457300 | -0.85188800 | 0.88525500  |
| C | -4.10892000 | -0.51142500 | -0.00010500 |
| H | -3.04164900 | 1.15036900  | 0.88158700  |
| H | -3.04120700 | 1.14985500  | -0.88226800 |
| H | -5.09149200 | -0.01144600 | -0.00029600 |
| H | -4.07004800 | -1.16579200 | -0.88872000 |
| H | -4.07026000 | -1.16551000 | 0.88872700  |
| I | 1.47758000  | -0.09061400 | -0.00003100 |

### **VIa**

Gibbs free energy before correction = -3519.42530600

Gibbs free energy after correction = -3519.41083995

|   |             |             |             |
|---|-------------|-------------|-------------|
| C | 1.36487400  | -0.87340700 | 2.60536600  |
| C | 2.24097900  | -0.28076700 | 1.49556400  |
| H | 1.62719700  | -1.94171900 | 2.72692800  |
| H | 1.57080000  | -0.36552200 | 3.56253500  |
| H | 1.89230200  | 0.75490300  | 1.28309100  |
| H | 3.26019400  | -0.14805100 | 1.92685800  |
| C | -1.59799700 | -2.24288800 | -2.36048400 |
| C | -2.32249800 | -2.04938400 | -0.16704400 |
| C | -3.67079500 | -2.30484600 | -0.53310600 |
| C | -3.93631100 | -2.54708900 | -1.90536400 |
| C | -2.90443000 | -2.51824500 | -2.81420300 |
| H | -0.75995200 | -2.19657600 | -3.06721600 |
| C | -1.95474300 | -1.78404000 | 1.19816000  |
| C | -4.67420000 | -2.29359600 | 0.46850800  |
| H | -4.96554900 | -2.75111600 | -2.22076800 |
| H | -3.07710900 | -2.69850500 | -3.87871900 |
| C | -4.31819000 | -2.04171800 | 1.77771000  |
| C | -2.97942900 | -1.78703900 | 2.14849000  |
| H | -5.71389000 | -2.48709900 | 0.18448700  |
| H | -5.08739300 | -2.03859300 | 2.55796400  |
| H | -2.73644600 | -1.60096800 | 3.19908000  |
| N | -1.31332900 | -2.02094500 | -1.08809900 |
| N | -0.60943200 | -1.60132100 | 1.41996500  |

|    |             |             |             |
|----|-------------|-------------|-------------|
| C  | -0.12477700 | -0.76509100 | 2.36261300  |
| O  | -0.79114600 | 0.09271900  | 2.97659300  |
| K  | -2.56034200 | 1.30093800  | 1.56792400  |
| Ni | 0.42234600  | -1.51762300 | -0.32626900 |
| C  | 4.63181200  | -0.36011400 | -0.41899700 |
| C  | 5.16062300  | 0.85062500  | 0.04882800  |
| C  | 6.48115400  | 0.93947900  | 0.49397900  |
| C  | 7.30392500  | -0.18712800 | 0.47836500  |
| C  | 6.79334900  | -1.40148900 | 0.01374200  |
| C  | 5.47293000  | -1.48306900 | -0.42623700 |
| H  | 4.51916400  | 1.74183000  | 0.06038900  |
| H  | 6.87111500  | 1.89792700  | 0.85484400  |
| H  | 8.34101900  | -0.11947900 | 0.82423200  |
| H  | 7.43230400  | -2.29152200 | -0.00885500 |
| H  | 5.07730500  | -2.44006300 | -0.79179300 |
| C  | 2.25918900  | -1.10171100 | 0.20878000  |
| H  | 2.69454700  | -2.09689900 | 0.47672700  |
| C  | 3.19250300  | -0.48629400 | -0.84684600 |
| H  | 2.82160300  | 0.51894800  | -1.13274500 |
| H  | 3.15473100  | -1.10024400 | -1.76778000 |
| I  | -0.29022500 | 1.33057400  | -1.29017500 |
| C  | -0.81392400 | 3.40674600  | -1.84560800 |
| C  | -1.82871500 | 4.03656500  | -0.92145900 |
| H  | 0.14352200  | 3.95329500  | -1.84941500 |
| H  | -1.18136200 | 3.32759500  | -2.87970400 |
| C  | -1.31869400 | 4.33804000  | 0.47992700  |
| H  | -2.16652200 | 4.98682400  | -1.38238900 |
| H  | -2.74277800 | 3.40734900  | -0.87907900 |
| C  | -2.38882800 | 4.91363800  | 1.38909700  |
| H  | -0.86639100 | 3.42794000  | 0.92850600  |
| H  | -0.46923900 | 5.04261900  | 0.40773600  |
| H  | -2.01470000 | 5.09518100  | 2.40960800  |
| H  | -2.76541500 | 5.87410700  | 0.99737800  |
| H  | -3.27467900 | 4.25408100  | 1.46786300  |

## TS7

Gibbs free energy before correction = -3519.40070500

Gibbs free energy after correction = -3519.38623895

|   |             |             |            |
|---|-------------|-------------|------------|
| C | -0.51504200 | -2.45228900 | 1.50174500 |
| C | -1.53381900 | -2.25080500 | 0.39350400 |
| H | -0.77105400 | -1.82339200 | 2.37871400 |
| H | -0.53318400 | -3.48915500 | 1.88947900 |

|    |             |             |             |
|----|-------------|-------------|-------------|
| H  | -1.21065300 | -2.83181600 | -0.49723500 |
| H  | -2.48117000 | -2.74167500 | 0.72030100  |
| C  | 2.02725600  | 1.57756800  | -2.20422900 |
| C  | 2.78239100  | -0.42095600 | -1.31922300 |
| C  | 4.06548700  | -0.25631700 | -1.91473100 |
| C  | 4.28045000  | 0.91136700  | -2.69098300 |
| C  | 3.26249000  | 1.82135100  | -2.84034100 |
| H  | 1.20662900  | 2.29618800  | -2.32130700 |
| C  | 2.48113300  | -1.58511100 | -0.52993300 |
| C  | 5.06304000  | -1.24099300 | -1.70855600 |
| H  | 5.25698600  | 1.06480600  | -3.16348100 |
| H  | 3.38854900  | 2.72767200  | -3.43887000 |
| C  | 4.76631500  | -2.35620700 | -0.95065700 |
| C  | 3.49568000  | -2.53428300 | -0.36759800 |
| H  | 6.05063800  | -1.10070500 | -2.16030300 |
| H  | 5.53007100  | -3.12576800 | -0.79356400 |
| H  | 3.29288900  | -3.43184200 | 0.22387000  |
| N  | 1.78866900  | 0.50861700  | -1.46452700 |
| N  | 1.20242000  | -1.67223200 | -0.03712500 |
| C  | 0.93665000  | -2.16914300 | 1.18547900  |
| O  | 1.78535200  | -2.36203400 | 2.08253400  |
| K  | 3.51001500  | -0.46474900 | 2.06469100  |
| Ni | 0.07798500  | 0.03073200  | -0.41314300 |
| C  | -4.10377100 | -1.16203900 | -0.86388000 |
| C  | -4.52287100 | -2.42991800 | -1.28999100 |
| C  | -5.78749100 | -2.92280200 | -0.96190000 |
| C  | -6.66489100 | -2.15185000 | -0.19887000 |
| C  | -6.26394000 | -0.88521900 | 0.23355200  |
| C  | -4.99815200 | -0.40150500 | -0.09444800 |
| H  | -3.83996300 | -3.03974900 | -1.89614100 |
| H  | -6.09124200 | -3.91729900 | -1.30802200 |
| H  | -7.65886500 | -2.53443000 | 0.05692100  |
| H  | -6.94653900 | -0.26812900 | 0.82874600  |
| H  | -4.68551100 | 0.59502300  | 0.24869800  |
| C  | -1.72299600 | -0.78773300 | 0.00852700  |
| H  | -2.18552200 | -0.27904400 | 0.89092000  |
| C  | -2.71953600 | -0.64361900 | -1.15288900 |
| H  | -2.32468100 | -1.17102500 | -2.04588800 |
| H  | -2.80537100 | 0.42394900  | -1.43980100 |
| C  | -0.61542300 | 2.23534200  | -0.28044800 |
| C  | -1.98453300 | 2.72864800  | 0.10666800  |
| H  | -0.70116800 | 1.51619600  | -1.14075700 |

|   |             |            |             |
|---|-------------|------------|-------------|
| H | 0.05924500  | 3.04895300 | -0.59029400 |
| C | -2.70244300 | 3.35802400 | -1.08371800 |
| H | -2.59123700 | 1.89095900 | 0.50180000  |
| H | -1.91043600 | 3.47216300 | 0.92295400  |
| C | -4.10206200 | 3.82193600 | -0.72942000 |
| H | -2.10167100 | 4.20633500 | -1.46360300 |
| H | -2.74446200 | 2.62659600 | -1.91415200 |
| H | -4.61009700 | 4.29127800 | -1.58791000 |
| H | -4.72922900 | 2.97595400 | -0.39561200 |
| H | -4.08511100 | 4.56050100 | 0.09124800  |
| I | 0.50159100  | 1.70279400 | 1.70014200  |

### TS8

Gibbs free energy before correction = -3519.41749100

Gibbs free energy after correction = -3519.40302495

|    |             |             |             |
|----|-------------|-------------|-------------|
| C  | 1.39783700  | -0.75005000 | 2.59714500  |
| C  | 2.25719100  | -0.15273800 | 1.47900600  |
| H  | 1.67777000  | -1.81374700 | 2.72375400  |
| H  | 1.60612800  | -0.23614200 | 3.54982700  |
| H  | 1.91479600  | 0.88568300  | 1.27489200  |
| H  | 3.28228600  | -0.03357300 | 1.89607000  |
| C  | -1.61171600 | -2.39753500 | -2.33380100 |
| C  | -2.28996200 | -2.11630800 | -0.13356500 |
| C  | -3.62082400 | -2.50855600 | -0.44008500 |
| C  | -3.89860000 | -2.86465400 | -1.78393700 |
| C  | -2.90003700 | -2.81303900 | -2.72814600 |
| H  | -0.79924900 | -2.32559400 | -3.06783100 |
| C  | -1.91035200 | -1.73874000 | 1.20366700  |
| C  | -4.59734600 | -2.51841000 | 0.58718000  |
| H  | -4.91503400 | -3.17484500 | -2.05080200 |
| H  | -3.08589300 | -3.07938600 | -3.77192200 |
| C  | -4.23218900 | -2.14993800 | 1.86399800  |
| C  | -2.91107400 | -1.76047600 | 2.17853800  |
| H  | -5.62278100 | -2.81725700 | 0.34634500  |
| H  | -4.97836500 | -2.15759600 | 2.66607800  |
| H  | -2.66188200 | -1.48914600 | 3.20787000  |
| N  | -1.31992900 | -2.07019600 | -1.08967500 |
| N  | -0.57375900 | -1.45017500 | 1.37803700  |
| C  | -0.09915800 | -0.68112500 | 2.38637100  |
| O  | -0.79170700 | 0.07051500  | 3.09676800  |
| K  | -2.41415400 | 1.38689000  | 1.57489800  |
| Ni | 0.42016900  | -1.31946700 | -0.38117400 |

|   |             |             |             |
|---|-------------|-------------|-------------|
| C | 4.65815100  | -0.30918600 | -0.42461300 |
| C | 5.22571000  | 0.88037500  | 0.05146800  |
| C | 6.54525900  | 0.92035500  | 0.50547600  |
| C | 7.32701300  | -0.23511100 | 0.49041500  |
| C | 6.77693500  | -1.42874600 | 0.01751200  |
| C | 5.45744400  | -1.46194700 | -0.43168300 |
| H | 4.61576100  | 1.79323200  | 0.06298400  |
| H | 6.96682600  | 1.86272900  | 0.87283200  |
| H | 8.36341800  | -0.20608200 | 0.84354500  |
| H | 7.38384900  | -2.34087800 | -0.00379200 |
| H | 5.03000200  | -2.40267300 | -0.80338500 |
| C | 2.26352000  | -0.95942900 | 0.18803400  |
| H | 2.62888700  | -1.98543700 | 0.44073700  |
| C | 3.21741900  | -0.37615800 | -0.86103000 |
| H | 2.88425800  | 0.64432100  | -1.13686400 |
| H | 3.15673700  | -0.98109400 | -1.78662100 |
| I | -0.26758700 | 1.21250400  | -1.26027000 |
| C | -1.07358200 | 3.58930800  | -2.01332700 |
| C | -2.10758300 | 4.09303300  | -1.05852500 |
| H | -0.11967900 | 4.13907100  | -2.02186300 |
| H | -1.42606200 | 3.33769100  | -3.02329500 |
| C | -1.56011400 | 4.48564300  | 0.30670700  |
| H | -2.62220000 | 4.98084200  | -1.49049600 |
| H | -2.92252000 | 3.34422400  | -0.94637900 |
| C | -2.63174400 | 4.96253100  | 1.26980700  |
| H | -0.98148000 | 3.63998100  | 0.73565800  |
| H | -0.80143100 | 5.27948100  | 0.17245200  |
| H | -2.22321900 | 5.20167600  | 2.26520300  |
| H | -3.12818500 | 5.87162700  | 0.88875100  |
| H | -3.44013400 | 4.21824800  | 1.40801000  |

***n*-Bu •**

Gibbs free energy before correction = -157.45783300

Gibbs free energy after correction = -157.44336659

|   |             |             |             |
|---|-------------|-------------|-------------|
| C | -1.99100000 | -0.08440200 | -0.00000300 |
| C | -0.63327600 | 0.51308300  | -0.00001700 |
| H | -2.45307800 | -0.42399000 | -0.93509800 |
| H | -2.45317200 | -0.42375800 | 0.93512900  |
| C | 0.49414100  | -0.52851800 | 0.00002100  |
| H | -0.49884400 | 1.16499100  | -0.88572900 |
| H | -0.49885400 | 1.16505900  | 0.88564400  |
| C | 1.87070300  | 0.10721000  | -0.00000200 |

|   |            |             |             |
|---|------------|-------------|-------------|
| H | 0.37635400 | -1.18654400 | 0.88199000  |
| H | 0.37635200 | -1.18660600 | -0.88190200 |
| H | 2.67522900 | -0.64691500 | 0.00001200  |
| H | 2.01629800 | 0.74674000  | -0.88862600 |
| H | 2.01630900 | 0.74678500  | 0.88858700  |

## VIb

Gibbs free energy before correction = -3361.98343200

Gibbs free energy after correction = -3361.96896589

|    |             |             |             |
|----|-------------|-------------|-------------|
| C  | -1.03990500 | 2.19961100  | 1.70892500  |
| C  | -1.90163700 | 0.98268200  | 1.40370600  |
| H  | -1.32698800 | 3.01764700  | 1.02065500  |
| H  | -1.20310700 | 2.55858600  | 2.73737800  |
| H  | -1.70462800 | 0.18620700  | 2.15351700  |
| H  | -2.96381800 | 1.26886400  | 1.55984500  |
| C  | 2.36610200  | -1.38819000 | -1.85878700 |
| C  | 2.72428600  | 0.68571000  | -0.89444900 |
| C  | 4.02209200  | 0.79330800  | -1.46071100 |
| C  | 4.45318000  | -0.27488400 | -2.28672900 |
| C  | 3.62564700  | -1.35395300 | -2.49325400 |
| H  | 1.70289300  | -2.25340100 | -1.97930000 |
| C  | 2.17556100  | 1.72007200  | -0.08036300 |
| C  | 4.79871400  | 1.94159400  | -1.17569000 |
| H  | 5.44418200  | -0.22373200 | -2.75107200 |
| H  | 3.92801900  | -2.19109200 | -3.12786700 |
| C  | 4.27547100  | 2.92358100  | -0.35872200 |
| C  | 2.97948600  | 2.82406100  | 0.18852900  |
| H  | 5.80072100  | 2.03014800  | -1.60801300 |
| H  | 4.87174400  | 3.81368300  | -0.13115100 |
| H  | 2.59666600  | 3.63133100  | 0.81871700  |
| N  | 1.93073300  | -0.40879300 | -1.08638500 |
| N  | 0.85406400  | 1.54044000  | 0.31432900  |
| C  | 0.44319500  | 1.97977800  | 1.54020700  |
| O  | 1.21513900  | 2.15858500  | 2.49509500  |
| K  | 1.98467500  | -0.40362600 | 2.48385600  |
| Ni | 0.11804000  | -0.14831700 | -0.28333700 |
| C  | -4.09271400 | 0.17413200  | -0.69310500 |
| C  | -5.13091200 | 0.12382900  | 0.24616900  |
| C  | -6.33357300 | 0.79870100  | 0.02720200  |
| C  | -6.51962700 | 1.53838400  | -1.14059100 |
| C  | -5.49404800 | 1.59730100  | -2.08686600 |
| C  | -4.29523200 | 0.92271100  | -1.86195200 |

|   |             |             |             |
|---|-------------|-------------|-------------|
| H | -4.99222400 | -0.46279600 | 1.16333100  |
| H | -7.13278000 | 0.74317100  | 0.77462500  |
| H | -7.46315600 | 2.06628400  | -1.31568700 |
| H | -5.63251200 | 2.17081200  | -3.01009700 |
| H | -3.49302100 | 0.96841700  | -2.61002400 |
| C | -1.67773600 | 0.44510900  | 0.00718600  |
| H | -1.67270100 | 1.30318800  | -0.70347400 |
| C | -2.77615400 | -0.51658700 | -0.45082600 |
| H | -2.91697800 | -1.31400300 | 0.30232700  |
| H | -2.46067800 | -1.01724000 | -1.38587000 |
| I | -0.13629200 | -2.61068400 | 0.46408800  |

## VII

Gibbs free energy before correction = -3519.47299400

Gibbs free energy after correction = -3519.45852795

|    |             |             |             |
|----|-------------|-------------|-------------|
| C  | 0.86630300  | -1.43029700 | -2.54725900 |
| C  | 1.72274000  | -1.49166400 | -1.29307600 |
| H  | 1.04055200  | -0.47369600 | -3.07419400 |
| H  | 1.11867400  | -2.25297700 | -3.23406800 |
| H  | 1.36138700  | -2.31552500 | -0.64057100 |
| H  | 2.74994700  | -1.79659800 | -1.58252600 |
| C  | -2.15181200 | 2.35655000  | 1.03779200  |
| C  | -2.84223100 | 0.71621100  | -0.43969800 |
| C  | -4.21012900 | 1.04981500  | -0.23756100 |
| C  | -4.50289000 | 2.09667000  | 0.66856300  |
| C  | -3.47681300 | 2.75076400  | 1.30586900  |
| H  | -1.32367600 | 2.86974700  | 1.54101800  |
| C  | -2.46287400 | -0.34136600 | -1.33475000 |
| C  | -5.21736800 | 0.33882500  | -0.93569900 |
| H  | -5.54931000 | 2.36897700  | 0.84479800  |
| H  | -3.66303400 | 3.56405500  | 2.01179000  |
| C  | -4.84829000 | -0.66173000 | -1.80338700 |
| C  | -3.49334600 | -1.00809600 | -2.00356800 |
| H  | -6.26695100 | 0.60289900  | -0.77047800 |
| H  | -5.61386700 | -1.21527100 | -2.35760000 |
| H  | -3.24663600 | -1.80555900 | -2.70659100 |
| N  | -1.84208000 | 1.38432700  | 0.20146200  |
| N  | -1.09565900 | -0.54042800 | -1.47006700 |
| C  | -0.58936000 | -1.56845200 | -2.19414100 |
| O  | -1.20366600 | -2.60609500 | -2.49422900 |
| K  | -2.04027600 | -3.23259000 | -0.07212900 |
| Ni | 0.02255300  | 0.53394200  | -0.12854900 |

|   |             |             |             |
|---|-------------|-------------|-------------|
| C | 4.21543800  | -0.48923100 | 0.28918600  |
| C | 4.91557300  | -1.69835300 | 0.19256900  |
| C | 6.25393700  | -1.72558300 | -0.20471400 |
| C | 6.91780600  | -0.53824200 | -0.51180100 |
| C | 6.23313500  | 0.67575200  | -0.41875800 |
| C | 4.89660900  | 0.69637300  | -0.02442900 |
| H | 4.39887100  | -2.63488800 | 0.43840500  |
| H | 6.78218500  | -2.68300600 | -0.27246100 |
| H | 7.96812000  | -0.55695900 | -0.82157600 |
| H | 6.74722100  | 1.61445000  | -0.65289700 |
| H | 4.36265700  | 1.65355500  | 0.04846800  |
| C | 1.82439300  | -0.20228300 | -0.49406900 |
| H | 2.26168600  | 0.57615100  | -1.15397700 |
| C | 2.76414800  | -0.44281200 | 0.69503700  |
| H | 2.49523700  | -1.40103800 | 1.17625400  |
| H | 2.64750000  | 0.32893300  | 1.47413500  |
| C | 0.96966800  | 2.10028900  | 0.52027400  |
| C | 0.81602800  | 3.15607700  | -0.55483200 |
| H | 2.03693700  | 1.95000700  | 0.73960600  |
| H | 0.48151500  | 2.38612300  | 1.47204700  |
| C | 1.49565400  | 4.47735400  | -0.20182500 |
| H | 1.24717500  | 2.78240200  | -1.50842300 |
| H | -0.25129700 | 3.35719500  | -0.77541800 |
| C | 1.34351800  | 5.52794700  | -1.28468000 |
| H | 1.07676500  | 4.85094300  | 0.75319500  |
| H | 2.56854200  | 4.28859900  | -0.00194900 |
| H | 1.84081900  | 6.47542800  | -1.01758700 |
| H | 1.77869700  | 5.18397900  | -2.23981900 |
| H | 0.27975800  | 5.75545300  | -1.47593300 |
| I | -0.55926900 | -1.09679600 | 2.23094300  |

## VIIa

Gibbs free energy before correction = -3519.48210500

Gibbs free energy after correction = -3519.46763895

|   |             |             |             |
|---|-------------|-------------|-------------|
| C | -2.11375300 | -0.22911700 | 2.49408800  |
| C | -3.06216500 | -0.70846900 | 1.41562500  |
| H | -2.20003300 | 0.86679100  | 2.62724400  |
| H | -2.37459400 | -0.65607300 | 3.47923300  |
| H | -2.96653200 | -1.80366900 | 1.27564200  |
| H | -4.10193600 | -0.54747600 | 1.76979900  |
| C | 0.87536900  | -1.35860900 | -2.64047200 |
| C | 1.36346800  | -1.83094800 | -0.42202700 |



|    |             |             |             |
|----|-------------|-------------|-------------|
| C  | 2.58161800  | -2.46956200 | -0.77125100 |
| C  | 2.91123500  | -2.52667100 | -2.14715300 |
| C  | 2.06543200  | -1.97202000 | -3.07992700 |
| H  | 0.18126800  | -0.90718400 | -3.36034200 |
| C  | 0.94626800  | -1.71130200 | 0.94232800  |
| C  | 3.40556600  | -2.99380000 | 0.25504300  |
| H  | 3.84634100  | -3.01126300 | -2.44894600 |
| H  | 2.29573300  | -1.99770600 | -4.14790100 |
| C  | 3.00155100  | -2.87588900 | 1.56610800  |
| C  | 1.78707500  | -2.24234300 | 1.91745300  |
| H  | 4.34866600  | -3.48036600 | -0.01393900 |
| H  | 3.62771100  | -3.28219300 | 2.36747200  |
| H  | 1.49769100  | -2.18600000 | 2.96963400  |
| N  | 0.53863900  | -1.29718700 | -1.36592200 |
| N  | -0.30198200 | -1.12717400 | 1.13313000  |
| C  | -0.64688800 | -0.53282500 | 2.30152300  |
| O  | 0.15093700  | -0.21081200 | 3.19638300  |
| K  | 2.25830300  | 1.05925300  | 2.37336300  |
| Ni | -1.12911400 | -0.50972900 | -0.55223200 |
| C  | -5.26159600 | -0.11381400 | -0.71058400 |
| C  | -6.14558800 | -1.08921900 | -0.23431800 |
| C  | -7.46725400 | -0.76633700 | 0.07728800  |
| C  | -7.92537600 | 0.54162800  | -0.08227100 |
| C  | -7.05295100 | 1.52403800  | -0.55529600 |
| C  | -5.73358900 | 1.19697000  | -0.86418100 |
| H  | -5.78824000 | -2.11926800 | -0.10923100 |
| H  | -8.14512700 | -1.54369300 | 0.44643200  |
| H  | -8.96271500 | 0.79602100  | 0.15975600  |
| H  | -7.40535200 | 2.55284900  | -0.68758400 |
| H  | -5.04899800 | 1.96940500  | -1.23896800 |
| C  | -2.86930500 | 0.01431100  | 0.09919200  |
| H  | -2.95854000 | 1.10436700  | 0.26439900  |
| C  | -3.81917300 | -0.43445100 | -1.00883400 |
| H  | -3.71428600 | -1.52528700 | -1.16710300 |
| H  | -3.53568300 | 0.05511300  | -1.95941300 |
| C  | -0.97290300 | 1.26460200  | -1.30805600 |
| C  | -0.05270000 | 2.02456300  | -0.38152400 |
| H  | -1.93070700 | 1.79059300  | -1.46271000 |
| H  | -0.50525100 | 1.08233900  | -2.29582500 |
| C  | 0.29775700  | 3.42971900  | -0.86371000 |
| H  | -0.51491800 | 2.10183400  | 0.62617400  |
| H  | 0.89193200  | 1.45168900  | -0.25629500 |

|   |             |            |             |
|---|-------------|------------|-------------|
| C | 1.17022200  | 4.18443100 | 0.12181700  |
| H | 0.80638400  | 3.35819700 | -1.84467800 |
| H | -0.63928500 | 3.98902600 | -1.04837000 |
| H | 1.37333400  | 5.21646500 | -0.20916200 |
| H | 0.69041900  | 4.24851900 | 1.11583300  |
| H | 2.15215700  | 3.69101300 | 0.24828000  |
| I | 4.17415100  | 1.12528800 | -0.47919900 |

## TS9

Gibbs free energy before correction = -3519.46142400

Gibbs free energy after correction = -3519.44695795

|    |             |             |             |
|----|-------------|-------------|-------------|
| C  | 1.68997400  | 0.25885700  | -2.47717300 |
| C  | 2.62536900  | -0.35475500 | -1.45127600 |
| H  | 1.73689800  | 1.36450000  | -2.44769700 |
| H  | 2.01156600  | -0.01018000 | -3.49944600 |
| H  | 2.45689500  | -1.44619100 | -1.39526300 |
| H  | 3.66428900  | -0.23428400 | -1.82139400 |
| C  | -0.84560700 | -2.07330600 | 2.35854500  |
| C  | -1.55034900 | -2.03380900 | 0.14883400  |
| C  | -2.71797900 | -2.78033100 | 0.45313300  |
| C  | -2.90601100 | -3.16718400 | 1.80261800  |
| C  | -1.97635800 | -2.81482200 | 2.75401500  |
| H  | -0.08857200 | -1.77204800 | 3.09319200  |
| C  | -1.27856500 | -1.57898400 | -1.18874900 |
| C  | -3.63658900 | -3.08355600 | -0.58366100 |
| H  | -3.79998500 | -3.74105100 | 2.07089500  |
| H  | -2.09802500 | -3.09571100 | 3.80332900  |
| C  | -3.36530900 | -2.66082400 | -1.86619900 |
| C  | -2.20267600 | -1.91845500 | -2.17793300 |
| H  | -4.54270100 | -3.65000500 | -0.34516900 |
| H  | -4.06226200 | -2.90158100 | -2.67639700 |
| H  | -2.01366100 | -1.62427100 | -3.21407500 |
| N  | -0.64008400 | -1.70461500 | 1.10722400  |
| N  | -0.08720800 | -0.90094600 | -1.33119200 |
| C  | 0.23185600  | -0.14189300 | -2.39452500 |
| O  | -0.55377700 | 0.26100200  | -3.27259200 |
| K  | -2.75252000 | 1.23575900  | -2.33314800 |
| Ni | 0.75882100  | -0.44628500 | 0.42933100  |
| C  | 4.93276400  | -0.41186200 | 0.63751700  |
| C  | 5.61013800  | -1.49638700 | 0.06857100  |
| C  | 6.96593100  | -1.40538900 | -0.25081900 |
| C  | 7.66518000  | -0.22355300 | -0.00608500 |

|   |             |             |             |
|---|-------------|-------------|-------------|
| C | 7.00044300  | 0.86585200  | 0.56087100  |
| C | 5.64651700  | 0.77016700  | 0.87815000  |
| H | 5.06217300  | -2.42719800 | -0.12460200 |
| H | 7.47978300  | -2.26549100 | -0.69367500 |
| H | 8.72940600  | -0.15111500 | -0.25419500 |
| H | 7.54343800  | 1.79583000  | 0.76155800  |
| H | 5.12641400  | 1.62531400  | 1.32987800  |
| C | 2.60101200  | 0.28109500  | -0.05470300 |
| H | 3.02658300  | 1.28834600  | -0.19698700 |
| C | 3.46219800  | -0.47972100 | 0.95556000  |
| H | 3.14399500  | -1.53884300 | 0.99217900  |
| H | 3.29627600  | -0.06234700 | 1.96575300  |
| C | 1.23199500  | 1.35927600  | 0.97459400  |
| C | 0.58115300  | 2.43030400  | 0.13306800  |
| H | 2.08728000  | 1.75490600  | 1.54457100  |
| H | 0.51234100  | 0.98619400  | 1.76151900  |
| C | 0.17624700  | 3.65598700  | 0.94177600  |
| H | 1.26537700  | 2.73986000  | -0.68130200 |
| H | -0.32383500 | 2.01912900  | -0.35856300 |
| C | -0.54184600 | 4.68940100  | 0.09609400  |
| H | -0.47355400 | 3.33837500  | 1.78077000  |
| H | 1.07753700  | 4.09763800  | 1.40868900  |
| H | -0.81573600 | 5.58505300  | 0.67780200  |
| H | 0.08417700  | 5.02181400  | -0.75100300 |
| H | -1.47533400 | 4.27457900  | -0.32767100 |
| I | -3.29123700 | 1.28452100  | 1.05247200  |

## VIIb

Gibbs free energy before correction = -3519.49845200

Gibbs free energy after correction = -3519.48398595

|   |             |             |             |
|---|-------------|-------------|-------------|
| C | -1.84113300 | 0.59549800  | 2.06617100  |
| C | -2.72719300 | 0.13365400  | 0.91335200  |
| H | -1.89043000 | 1.69122600  | 2.19254800  |
| H | -2.24432200 | 0.19543500  | 3.01599500  |
| H | -2.38622100 | -0.86400500 | 0.51936900  |
| H | -3.71028500 | -0.13821900 | 1.33739300  |
| C | 1.17339800  | -2.45220400 | -2.15772100 |
| C | 1.64816900  | -2.03126400 | 0.07867700  |
| C | 2.88590200  | -2.72120800 | -0.00808000 |
| C | 3.23785600  | -3.28049700 | -1.26196300 |
| C | 2.38969200  | -3.14102400 | -2.33499200 |
| H | 0.47368100  | -2.33627200 | -2.99333900 |
| C | 1.23466200  | -1.40112700 | 1.30681400  |

|    |             |             |             |
|----|-------------|-------------|-------------|
| C  | 3.71735800  | -2.80936900 | 1.13640000  |
| H  | 4.19014200  | -3.81381700 | -1.35676600 |
| H  | 2.63566100  | -3.55569500 | -3.31612000 |
| C  | 3.30240300  | -2.23434900 | 2.31715200  |
| C  | 2.07718000  | -1.53717500 | 2.41042200  |
| H  | 4.67233300  | -3.33966000 | 1.06046400  |
| H  | 3.92924800  | -2.31355200 | 3.21213300  |
| H  | 1.77209500  | -1.11117600 | 3.37038100  |
| N  | 0.81208100  | -1.92545300 | -1.00042500 |
| N  | 0.00473000  | -0.77166300 | 1.26387600  |
| C  | -0.37500500 | 0.19865700  | 2.11208400  |
| O  | 0.35619500  | 0.77421100  | 2.94040100  |
| K  | 2.69060200  | 1.57806700  | 2.23337500  |
| Ni | -0.79645300 | -0.97290000 | -0.50454000 |
| C  | -5.25603500 | -0.06456300 | -0.70135200 |
| C  | -5.51214900 | -1.42120700 | -0.46706600 |
| C  | -6.73175600 | -1.83953300 | 0.06736900  |
| C  | -7.71822700 | -0.90350800 | 0.37768800  |
| C  | -7.47685000 | 0.45243300  | 0.14778500  |
| C  | -6.25743500 | 0.86503000  | -0.38711700 |
| H  | -4.73801500 | -2.16041500 | -0.70900600 |
| H  | -6.91267400 | -2.90574900 | 0.24182800  |
| H  | -8.67654600 | -1.22979300 | 0.79546600  |
| H  | -8.24801500 | 1.19415500  | 0.38269300  |
| H  | -6.07485700 | 1.93097600  | -0.57424500 |
| C  | -3.00740200 | 1.09369600  | -0.24485900 |
| H  | -3.54040500 | 1.97341300  | 0.17605200  |
| C  | -3.94082900 | 0.40374900  | -1.25371000 |
| H  | -3.38372100 | -0.45415100 | -1.68118700 |
| H  | -4.12945300 | 1.10554800  | -2.08679300 |
| C  | -1.79490800 | 1.62066000  | -1.01126200 |
| C  | -0.86789900 | 2.59523500  | -0.30309300 |
| H  | -2.18031400 | 2.12688000  | -1.91807200 |
| H  | -1.19893500 | 0.76433300  | -1.42746400 |
| C  | 0.04110500  | 3.33424700  | -1.27219600 |
| H  | -1.47238500 | 3.32978300  | 0.26638900  |
| H  | -0.24463400 | 2.07188700  | 0.44907300  |
| C  | 0.95520900  | 4.33416800  | -0.59386900 |
| H  | 0.64239700  | 2.59448200  | -1.83753100 |
| H  | -0.58219600 | 3.85087400  | -2.02765600 |
| H  | 1.61478400  | 4.84835000  | -1.31281300 |
| H  | 0.37884800  | 5.10811900  | -0.05638600 |

|   |            |            |             |
|---|------------|------------|-------------|
| H | 1.61208300 | 3.84491800 | 0.14854200  |
| I | 3.53523500 | 1.10936200 | -1.04085100 |

#### IVd

Gibbs free energy before correction = -3130.75812700

Gibbs free energy after correction = -3130.74366081

|    |             |             |             |
|----|-------------|-------------|-------------|
| C  | -1.65778700 | 3.00089400  | -0.96889300 |
| C  | -2.69113500 | 1.94462600  | -1.34117600 |
| H  | -1.23787800 | 3.43340000  | -1.89855400 |
| H  | -2.13907400 | 3.82703900  | -0.42240800 |
| H  | -3.12525900 | 1.49743200  | -0.42606100 |
| H  | -3.52958000 | 2.45753500  | -1.85312700 |
| C  | -2.17188100 | 0.85293600  | -2.23142800 |
| H  | -1.63565300 | 1.18188600  | -3.13595300 |
| C  | -2.57729200 | -0.46859300 | -2.12992200 |
| H  | -3.35878600 | -0.75972600 | -1.41419300 |
| H  | -2.39507800 | -1.16800500 | -2.95761600 |
| C  | 1.38064100  | -2.22204600 | -1.42381300 |
| C  | 1.95537300  | -0.13934200 | -0.57773300 |
| C  | 3.29844200  | -0.54437300 | -0.35293800 |
| C  | 3.64411700  | -1.87094100 | -0.71339600 |
| C  | 2.69243600  | -2.70703600 | -1.24952900 |
| H  | 0.59080200  | -2.86888400 | -1.82653100 |
| C  | 1.50596400  | 1.19055900  | -0.25866800 |
| C  | 4.21427400  | 0.37692900  | 0.21285500  |
| H  | 4.67344500  | -2.21206400 | -0.55632500 |
| H  | 2.93088400  | -3.73494400 | -1.53510800 |
| C  | 3.77881400  | 1.64534800  | 0.52948200  |
| C  | 2.44578100  | 2.05646600  | 0.30807300  |
| H  | 5.24840600  | 0.06327300  | 0.38918300  |
| H  | 4.47880200  | 2.36592300  | 0.96650900  |
| H  | 2.14841000  | 3.07458400  | 0.56996300  |
| N  | 1.03254400  | -0.98942900 | -1.10620900 |
| N  | 0.19856000  | 1.46894300  | -0.61162000 |
| C  | -0.47419700 | 2.54460100  | -0.13759600 |
| O  | -0.18419300 | 3.16452100  | 0.90100300  |
| K  | 0.09109900  | 1.14204900  | 2.54275300  |
| Ni | -0.80572900 | -0.20801600 | -1.17584500 |
| I  | -1.52878100 | -1.61631800 | 1.23653700  |

#### P<sup>pre</sup>

Gibbs free energy before correction = -1713.54322000

Gibbs free energy after correction = -1713.52875413

|   |             |             |             |
|---|-------------|-------------|-------------|
| C | 0.94414600  | 1.49679400  | 1.19550900  |
| C | 2.03948900  | 1.06295500  | 0.23055900  |
| H | 1.02520500  | 0.96636800  | 2.16176800  |
| H | 1.08213300  | 2.57101500  | 1.42584600  |
| H | 1.72941200  | 1.33615100  | -0.79799500 |
| H | 2.95290100  | 1.64941400  | 0.43706400  |
| C | -3.15082300 | -2.16287900 | -0.54056100 |
| C | -3.33571600 | -0.09908400 | 0.46711900  |
| C | -4.72510800 | -0.01407400 | 0.12614800  |
| C | -5.29644500 | -1.10383500 | -0.58265900 |
| C | -4.51618300 | -2.18053100 | -0.91771500 |
| H | -2.51389400 | -3.02036400 | -0.80382300 |
| C | -2.70400500 | 0.99428500  | 1.17280100  |
| C | -5.48159800 | 1.13617000  | 0.46563800  |
| H | -6.35843400 | -1.06118900 | -0.85099300 |
| H | -4.92262700 | -3.03734500 | -1.46282400 |
| C | -4.86753800 | 2.17187700  | 1.13837100  |
| C | -3.50283800 | 2.09779900  | 1.48373000  |
| H | -6.54026400 | 1.17819400  | 0.18720600  |
| H | -5.43846600 | 3.06798500  | 1.40582500  |
| H | -3.02831400 | 2.93074700  | 2.01564200  |
| N | -2.58323600 | -1.17699800 | 0.11319800  |
| N | -1.37951300 | 0.96287200  | 1.54119900  |
| C | -0.47985000 | 1.38825500  | 0.67429900  |
| O | -0.70766000 | 1.77516300  | -0.50777500 |
| K | -2.79998900 | 2.04625200  | -1.82861800 |
| C | 4.81246200  | 0.03071000  | -0.44464600 |
| C | 5.20413000  | 1.10496800  | -1.25331700 |
| C | 6.37215800  | 1.81974400  | -0.98338500 |
| C | 7.17116100  | 1.47119000  | 0.10572300  |
| C | 6.79432300  | 0.40104200  | 0.91959100  |
| C | 5.62741900  | -0.31041200 | 0.64425300  |
| H | 4.57723100  | 1.38440900  | -2.10959100 |
| H | 6.66010900  | 2.65621900  | -1.62960900 |
| H | 8.08848100  | 2.03022900  | 0.31905100  |
| H | 7.41800100  | 0.11583100  | 1.77394900  |
| H | 5.33932500  | -1.15605500 | 1.28208000  |
| C | 2.40157500  | -0.41988800 | 0.27533300  |
| H | 2.76976700  | -0.64419100 | 1.30168400  |
| C | 3.54349900  | -0.73034100 | -0.70399700 |
| H | 3.18636200  | -0.52366000 | -1.73202000 |

|   |             |             |             |
|---|-------------|-------------|-------------|
| H | 3.77135700  | -1.81052600 | -0.66005900 |
| C | 1.19399200  | -1.31853400 | 0.02029300  |
| C | 1.45102000  | -2.80988200 | 0.17083700  |
| H | 0.79243600  | -1.10716500 | -0.99429500 |
| H | 0.38239200  | -1.03540500 | 0.71768000  |
| C | 0.18688000  | -3.64923500 | 0.08626400  |
| H | 2.16053800  | -3.16586200 | -0.60152200 |
| H | 1.95280000  | -2.99771200 | 1.14289600  |
| C | 0.44814500  | -5.13567100 | 0.23301500  |
| H | -0.52929800 | -3.31095500 | 0.86090900  |
| H | -0.31111800 | -3.44772100 | -0.88324900 |
| H | -0.47856100 | -5.72995500 | 0.16709700  |
| H | 1.13255800  | -5.50281100 | -0.55250600 |
| H | 0.91849500  | -5.36539000 | 1.20575800  |

## P

Gibbs free energy before correction = -1114.23927400

Gibbs free energy after correction = -1114.22480776

|   |             |             |             |
|---|-------------|-------------|-------------|
| C | 0.70250900  | -1.82580600 | -0.64059400 |
| C | 1.82892900  | -1.19106300 | 0.16036000  |
| H | 0.73863400  | -1.51019600 | -1.69951600 |
| H | 0.82869100  | -2.92508200 | -0.64839200 |
| H | 1.58391100  | -1.26930100 | 1.23793700  |
| H | 2.74722400  | -1.78554800 | 0.01169000  |
| C | -3.33322900 | 1.73936100  | 0.94656400  |
| C | -3.59881600 | -0.33599800 | 0.00463600  |
| C | -4.99008100 | -0.35542200 | 0.32973000  |
| C | -5.51420500 | 0.75699600  | 1.03514400  |
| C | -4.68738200 | 1.80391500  | 1.35617200  |
| H | -2.66912800 | 2.58868400  | 1.16601800  |
| C | -3.04827100 | -1.46386900 | -0.68226600 |
| C | -5.80315100 | -1.44536600 | -0.07029900 |
| H | -6.57610600 | 0.76094400  | 1.30621500  |
| H | -5.05318300 | 2.67997800  | 1.89925300  |
| C | -5.25433900 | -2.49181200 | -0.77308300 |
| C | -3.87337900 | -2.50182700 | -1.06728100 |
| H | -6.86854200 | -1.42809600 | 0.18479300  |
| H | -5.87772500 | -3.33214100 | -1.09439200 |
| H | -3.43257300 | -3.34952700 | -1.60309500 |
| N | -2.80626100 | 0.72494500  | 0.30284200  |
| N | -1.67455600 | -1.50414400 | -1.00088300 |
| C | -0.67714800 | -1.59489100 | -0.05917400 |

|   |             |             |             |
|---|-------------|-------------|-------------|
| O | -0.89145600 | -1.55113300 | 1.13702900  |
| C | 4.59306900  | 0.05408900  | 0.44377600  |
| C | 5.08582400  | -0.85994900 | 1.38348400  |
| C | 6.27798000  | -1.55015000 | 1.15767500  |
| C | 6.99925600  | -1.33772100 | -0.01723600 |
| C | 6.52026400  | -0.42880900 | -0.96279800 |
| C | 5.32993500  | 0.25888700  | -0.73140600 |
| H | 4.52085200  | -1.03138600 | 2.30851200  |
| H | 6.64645800  | -2.25935900 | 1.90695100  |
| H | 7.93552300  | -1.87729500 | -0.19538900 |
| H | 7.08220900  | -0.25078100 | -1.88622200 |
| H | 4.96121400  | 0.97893600  | -1.47339700 |
| C | 2.12773700  | 0.26632700  | -0.18766000 |
| H | 2.44072600  | 0.29850700  | -1.25518900 |
| C | 3.29950800  | 0.78802000  | 0.65646800  |
| H | 3.00913300  | 0.73766600  | 1.72394900  |
| H | 3.46333200  | 1.85539600  | 0.42364900  |
| C | 0.89940000  | 1.16227500  | -0.04714700 |
| C | 1.07374200  | 2.59043500  | -0.53877200 |
| H | 0.56629600  | 1.16263500  | 1.01216300  |
| H | 0.05918200  | 0.71702400  | -0.61375800 |
| C | -0.21998500 | 3.38895700  | -0.52374400 |
| H | 1.82660800  | 3.12862100  | 0.06935500  |
| H | 1.48305600  | 2.57281200  | -1.57020600 |
| C | -0.05183200 | 4.80028900  | -1.05231100 |
| H | -0.98937200 | 2.85092500  | -1.11260700 |
| H | -0.61071200 | 3.41866600  | 0.51282200  |
| H | -0.99617100 | 5.36932300  | -1.03038000 |
| H | 0.68818200  | 5.36560500  | -0.45821100 |
| H | 0.30668000  | 4.79636300  | -2.09716100 |
| H | -1.43503000 | -1.76112300 | -1.95676800 |

### TS8m

Gibbs free energy before correction = -3064.11963200

Gibbs free energy after correction = -3064.10516582

|   |             |             |             |
|---|-------------|-------------|-------------|
| C | -0.61283300 | -3.42429100 | -0.72574900 |
| C | 0.73865400  | -3.33788300 | -0.03284400 |
| H | -0.45029600 | -3.44655600 | -1.82113200 |
| H | -1.13058800 | -4.35835000 | -0.45783900 |
| H | 0.60829000  | -3.37533400 | 1.06548300  |
| H | 1.32814400  | -4.23704200 | -0.30174600 |
| C | 0.26235100  | 2.41458100  | 0.78372600  |



|    |             |             |             |
|----|-------------|-------------|-------------|
| C  | -1.49550800 | 1.27971300  | -0.28178800 |
| C  | -2.30071700 | 2.45852100  | -0.31127100 |
| C  | -1.74905000 | 3.64374700  | 0.24844700  |
| C  | -0.45807200 | 3.59990600  | 0.78449800  |
| H  | 1.27820400  | 2.36324700  | 1.19318100  |
| C  | -1.96919500 | 0.04906100  | -0.80749500 |
| C  | -3.58671800 | 2.37273800  | -0.89426500 |
| H  | -2.33588800 | 4.56870300  | 0.24304500  |
| H  | 0.00721500  | 4.50055000  | 1.19826900  |
| C  | -4.03135000 | 1.17094100  | -1.44059400 |
| C  | -3.24282000 | 0.01555600  | -1.40994100 |
| H  | -4.22010700 | 3.26706700  | -0.91235400 |
| H  | -5.02568900 | 1.12219500  | -1.89906100 |
| H  | -3.62171400 | -0.92142900 | -1.82637200 |
| N  | -0.23137800 | 1.25935800  | 0.26287300  |
| N  | -1.09843200 | -1.02787300 | -0.65267200 |
| C  | -1.57150600 | -2.28411900 | -0.45041200 |
| O  | -2.72849400 | -2.54172800 | -0.06782900 |
| K  | -3.02685700 | -0.72889000 | 1.78713400  |
| Ni | 0.53301200  | -0.48734600 | 0.33526200  |
| C  | 3.35756000  | -0.43351700 | 0.06397400  |
| C  | 4.30738100  | -0.01650400 | 1.00922600  |
| C  | 5.26587700  | 0.94399700  | 0.69203600  |
| C  | 5.29260100  | 1.51293300  | -0.58163200 |
| C  | 4.35202200  | 1.10890300  | -1.53183600 |
| C  | 3.39495500  | 0.14790500  | -1.21451000 |
| H  | 4.28284800  | -0.45543400 | 2.01423100  |
| H  | 5.99707200  | 1.25238100  | 1.44704300  |
| H  | 6.04228900  | 2.27011400  | -0.83384300 |
| H  | 4.36244000  | 1.54964500  | -2.53454600 |
| H  | 2.66047900  | -0.14770600 | -1.97230300 |
| C  | 1.49173600  | -2.10030500 | -0.40968800 |
| H  | 1.56456800  | -1.90083700 | -1.48990400 |
| C  | 2.34413800  | -1.43339500 | 0.46183100  |
| H  | 2.49925400  | -1.86403400 | 1.46075500  |
| H  | 1.13901500  | -0.11008200 | 1.64516400  |

### VIm

Gibbs free energy before correction = -3064.13964300

Gibbs free energy after correction = -3064.12517682

|   |             |             |            |
|---|-------------|-------------|------------|
| C | 0.95021700  | -3.22451700 | 1.23106300 |
| C | -0.44910900 | -3.37306900 | 0.63383100 |

|    |             |             |             |
|----|-------------|-------------|-------------|
| H  | 0.85279800  | -2.98978600 | 2.30860800  |
| H  | 1.49891700  | -4.17633600 | 1.15145700  |
| H  | -0.37207100 | -3.62490000 | -0.44221200 |
| H  | -0.93143500 | -4.24878000 | 1.11337900  |
| C  | -0.57269300 | 2.38501200  | -0.50575600 |
| C  | 1.41627000  | 1.45004700  | 0.23007600  |
| C  | 2.06805800  | 2.71310600  | 0.24593800  |
| C  | 1.29404800  | 3.84347300  | -0.12028400 |
| C  | -0.02253400 | 3.68376400  | -0.48584300 |
| H  | -1.60939100 | 2.21975200  | -0.83052700 |
| C  | 2.10708000  | 0.24697200  | 0.61678400  |
| C  | 3.43516200  | 2.78208900  | 0.61169800  |
| H  | 1.76211100  | 4.83419300  | -0.10871500 |
| H  | -0.64241900 | 4.53771800  | -0.77228600 |
| C  | 4.10359700  | 1.62023900  | 0.93807900  |
| C  | 3.46209400  | 0.36382800  | 0.93692800  |
| H  | 3.93838200  | 3.75466700  | 0.61875300  |
| H  | 5.16368300  | 1.66446200  | 1.21156800  |
| H  | 4.02628800  | -0.53159700 | 1.21066600  |
| N  | 0.11758300  | 1.31586800  | -0.15949800 |
| N  | 1.32665300  | -0.88595900 | 0.68782800  |
| C  | 1.82599800  | -2.14492200 | 0.61783200  |
| O  | 2.89814800  | -2.45042500 | 0.06938000  |
| K  | 2.25686000  | -1.13672900 | -2.17005700 |
| Ni | -0.46164800 | -0.65469800 | -0.28568400 |
| C  | -3.17680000 | -0.61608300 | 0.03934000  |
| C  | -4.10432700 | -0.32248400 | -0.97717700 |
| C  | -5.00366400 | 0.73401700  | -0.85259900 |
| C  | -5.00207800 | 1.52897300  | 0.29506700  |
| C  | -4.08993500 | 1.24865100  | 1.31571800  |
| C  | -3.19032100 | 0.19338600  | 1.19222200  |
| H  | -4.10617500 | -0.93891500 | -1.88470200 |
| H  | -5.71389500 | 0.93888800  | -1.66126000 |
| H  | -5.70717500 | 2.36077400  | 0.39474700  |
| H  | -4.07805100 | 1.86332500  | 2.22259100  |
| H  | -2.47676300 | 0.00433100  | 2.00220300  |
| C  | -1.30183600 | -2.14808600 | 0.80315200  |
| H  | -1.35997000 | -1.74845000 | 1.82741900  |
| C  | -2.20592200 | -1.70335000 | -0.15901900 |
| H  | -2.35430400 | -2.30462300 | -1.06723200 |
| H  | -0.39939900 | -0.65756300 | -1.95986300 |

## VIIc

Gibbs free energy before correction = -3558.7076600

Gibbs free energy after correction = -3558.69319384

|    |             |             |             |
|----|-------------|-------------|-------------|
| C  | 1.22673900  | -2.14431600 | -1.51919800 |
| C  | 2.39496700  | -1.73150100 | -0.62968100 |
| H  | 1.10866000  | -1.37412600 | -2.31196800 |
| H  | 2.35821800  | -2.32176800 | 0.30854400  |
| H  | 3.33614100  | -2.03316700 | -1.13494500 |
| C  | -1.05270500 | 2.08978400  | 2.04314100  |
| C  | -1.62978600 | -0.14087900 | 1.77424900  |
| C  | -2.76189000 | -0.00468900 | 2.61896900  |
| C  | -3.00615500 | 1.27590100  | 3.17218300  |
| C  | -2.16124300 | 2.32248800  | 2.88198600  |
| H  | -0.35861200 | 2.90278000  | 1.79458400  |
| C  | -1.32000700 | -1.38336900 | 1.13410300  |
| C  | -3.58827200 | -1.13179500 | 2.85318800  |
| H  | -3.87511900 | 1.41515200  | 3.82462500  |
| H  | -2.32860100 | 3.32279300  | 3.28907700  |
| C  | -3.26287300 | -2.33671900 | 2.26954900  |
| C  | -2.14194000 | -2.47007000 | 1.41658200  |
| H  | -4.46251400 | -1.02701600 | 3.50374000  |
| H  | -3.88018400 | -3.22047400 | 2.46427400  |
| H  | -1.91078100 | -3.44825100 | 0.98525000  |
| N  | -0.79651900 | 0.90588500  | 1.52099400  |
| N  | -0.18984100 | -1.37546600 | 0.32388300  |
| C  | -0.10681400 | -2.15966700 | -0.77874700 |
| O  | -1.04246400 | -2.84023900 | -1.22608200 |
| K  | -3.54686300 | -2.37178700 | -1.45338300 |
| Ni | 0.76520600  | 0.34108900  | 0.37774800  |
| I  | -3.58343900 | 1.02458000  | -1.30556500 |
| C  | 1.47739300  | -3.48550100 | -2.19088300 |
| H  | 2.39070100  | -3.44685500 | -2.80675900 |
| H  | 1.61628400  | -4.28091400 | -1.43633300 |
| H  | 0.63850500  | -3.78124300 | -2.83770200 |
| C  | 4.79233500  | -0.27594800 | 0.65628100  |
| C  | 5.35633200  | -1.41495200 | 1.24286300  |
| C  | 6.68500500  | -1.76405500 | 0.99520600  |
| C  | 7.47101400  | -0.97760300 | 0.15320600  |
| C  | 6.91939500  | 0.16092300  | -0.43829200 |
| C  | 5.59202500  | 0.50560800  | -0.18888800 |
| H  | 4.74258700  | -2.03409500 | 1.90898700  |
| H  | 7.10964000  | -2.65726100 | 1.46632400  |

|   |             |             |             |
|---|-------------|-------------|-------------|
| H | 8.51411500  | -1.24910300 | -0.04065900 |
| H | 7.53052400  | 0.78752800  | -1.09704200 |
| H | 5.16188800  | 1.40329200  | -0.65170800 |
| C | 2.46026300  | -0.25200000 | -0.31695600 |
| H | 2.79192400  | 0.30795200  | -1.20987100 |
| C | 3.34581800  | 0.08864200  | 0.87944100  |
| H | 2.97541800  | -0.44382500 | 1.77778300  |
| H | 3.28067400  | 1.17287300  | 1.09578500  |
| C | 0.77546400  | 1.77061700  | -0.92869100 |
| C | 1.70833500  | 2.90060800  | -0.55991100 |
| H | -0.28634500 | 2.08577300  | -0.88115900 |
| H | 0.97832500  | 1.38732000  | -1.94441100 |
| C | 1.52210600  | 4.13335900  | -1.44184100 |
| H | 1.56378400  | 3.19898900  | 0.50032800  |
| H | 2.76404900  | 2.57033600  | -0.63387700 |
| C | 2.47754700  | 5.25778900  | -1.09185900 |
| H | 1.65270500  | 3.83758000  | -2.50083000 |
| H | 0.47509700  | 4.48310000  | -1.35836700 |
| H | 2.33226600  | 6.14092700  | -1.73619900 |
| H | 2.34410100  | 5.58660500  | -0.04590300 |
| H | 3.52939100  | 4.93884800  | -1.20078000 |

## VIIId

Gibbs free energy before correction = -3558.70559300

Gibbs free energy after correction = -3558.69112684

|   |             |             |             |
|---|-------------|-------------|-------------|
| C | 1.75875200  | -2.41546000 | -1.44255400 |
| C | 2.70599400  | -1.82063300 | -0.40998400 |
| H | 2.59724400  | -2.36717500 | 0.54736300  |
| H | 3.74372300  | -2.02790300 | -0.75059500 |
| C | -1.16171700 | 1.13899800  | 2.49444900  |
| C | -1.70411800 | -0.92421200 | 1.57843600  |
| C | -2.93801600 | -0.96535600 | 2.27911800  |
| C | -3.24302900 | 0.12952800  | 3.12323600  |
| C | -2.36176300 | 1.18042200  | 3.23144300  |
| H | -0.44076100 | 1.96404700  | 2.55478400  |
| C | -1.31181000 | -1.98293000 | 0.69318500  |
| C | -3.80314900 | -2.07160800 | 2.09287400  |
| H | -4.18839400 | 0.12503300  | 3.67672000  |
| H | -2.57268200 | 2.04098300  | 3.87114600  |
| C | -3.42267600 | -3.08591400 | 1.24347600  |
| C | -2.19226500 | -3.05276000 | 0.54699200  |
| H | -4.75809900 | -2.09777000 | 2.62755100  |

|    |             |             |             |
|----|-------------|-------------|-------------|
| H  | -4.08081200 | -3.94869800 | 1.09635700  |
| H  | -1.92570200 | -3.88341100 | -0.10981000 |
| N  | -0.84735400 | 0.12640800  | 1.70803500  |
| N  | -0.05581700 | -1.83304800 | 0.10783900  |
| C  | 0.29636100  | -2.48146700 | -1.02815800 |
| O  | -0.49630900 | -3.08080400 | -1.77401400 |
| K  | -2.28277200 | -1.25060200 | -2.29847400 |
| Ni | 0.78884300  | -0.09279300 | 0.55077000  |
| I  | -3.85857200 | 1.39182000  | -0.86920500 |
| C  | 4.87303600  | 0.14979200  | 0.71613100  |
| C  | 5.68948000  | -0.89441700 | 1.16649800  |
| C  | 7.04800400  | -0.92807800 | 0.84738800  |
| C  | 7.61089400  | 0.08419800  | 0.06979200  |
| C  | 6.80652400  | 1.13075500  | -0.38547600 |
| C  | 5.45020500  | 1.16005700  | -0.06515000 |
| H  | 5.25001700  | -1.69032900 | 1.78078200  |
| H  | 7.67220300  | -1.75143500 | 1.21144500  |
| H  | 8.67705200  | 0.05977700  | -0.17933500 |
| H  | 7.24092300  | 1.93263600  | -0.99233800 |
| H  | 4.81950100  | 1.98522900  | -0.42063600 |
| C  | 2.55637000  | -0.33405900 | -0.16353000 |
| H  | 2.78773800  | 0.25004300  | -1.07158000 |
| C  | 3.39407800  | 0.17602500  | 1.00937700  |
| H  | 3.19027000  | -0.43687000 | 1.90878600  |
| H  | 3.10213700  | 1.21617400  | 1.25276000  |
| C  | 0.54071000  | 1.38973000  | -0.66515300 |
| C  | 1.15126400  | 2.67873000  | -0.16899600 |
| H  | -0.56790600 | 1.43705500  | -0.63888600 |
| H  | 0.86106500  | 1.15546500  | -1.69562200 |
| C  | 0.63698000  | 3.89863200  | -0.93041300 |
| H  | 0.94093100  | 2.82228200  | 0.91177300  |
| H  | 2.25569400  | 2.64131200  | -0.25674500 |
| C  | 1.26416600  | 5.19599000  | -0.45855900 |
| H  | 0.82848800  | 3.75264600  | -2.01118900 |
| H  | -0.46469400 | 3.94697000  | -0.82802900 |
| H  | 0.88060500  | 6.06755500  | -1.01473900 |
| H  | 1.06177200  | 5.37259100  | 0.61271100  |
| H  | 2.36132800  | 5.18034800  | -0.58433800 |
| H  | 2.03588700  | -3.48003200 | -1.57492200 |
| C  | 1.86817000  | -1.74866400 | -2.81118400 |
| H  | 2.92193700  | -1.68452800 | -3.13172800 |
| H  | 1.31610100  | -2.31859000 | -3.57472900 |

|   |            |             |             |
|---|------------|-------------|-------------|
| H | 1.46178800 | -0.72110400 | -2.79810400 |
|---|------------|-------------|-------------|

### TS9b

Gibbs free energy before correction = -3558.69130600

Gibbs free energy after correction = -3558.67683984

|    |             |             |             |
|----|-------------|-------------|-------------|
| C  | 1.41087100  | -1.62482900 | -2.18575300 |
| C  | 2.47772800  | -1.26369400 | -1.15216000 |
| H  | 1.30593800  | -0.79966900 | -2.91877200 |
| H  | 2.44152600  | -2.02842800 | -0.35200500 |
| H  | 3.46637100  | -1.38888100 | -1.63710500 |
| C  | -0.78315000 | 0.61465600  | 2.91183000  |
| C  | -1.50545000 | -1.15662500 | 1.59294500  |
| C  | -2.61093200 | -1.40738900 | 2.44745800  |
| C  | -2.75798400 | -0.56945600 | 3.58086300  |
| C  | -1.84946100 | 0.43689400  | 3.81536000  |
| H  | -0.04332400 | 1.41032600  | 3.06617200  |
| C  | -1.28119300 | -1.94061100 | 0.40665000  |
| C  | -3.51476700 | -2.45030300 | 2.12331600  |
| H  | -3.60358800 | -0.73642800 | 4.25723100  |
| H  | -1.93971500 | 1.09799700  | 4.68103200  |
| C  | -3.29016700 | -3.20805700 | 0.99455900  |
| C  | -2.18887600 | -2.96637100 | 0.14168700  |
| H  | -4.37247000 | -2.63603700 | 2.77796400  |
| H  | -3.97563400 | -4.02495200 | 0.74345300  |
| H  | -2.03471600 | -3.60671800 | -0.73190200 |
| N  | -0.62037800 | -0.15045400 | 1.84769700  |
| N  | -0.14472000 | -1.61630500 | -0.30482000 |
| C  | 0.00643100  | -1.85180400 | -1.62120500 |
| O  | -0.89517900 | -2.20917900 | -2.40204500 |
| K  | -3.26351800 | -1.20090200 | -2.27465600 |
| Ni | 0.62970800  | 0.11660900  | 0.34447800  |
| I  | -3.30031100 | 1.65638400  | -0.39613700 |
| C  | 1.82844800  | -2.87505400 | -2.95396800 |
| H  | 2.78525000  | -2.71605300 | -3.47794000 |
| H  | 1.96326000  | -3.72826200 | -2.26416200 |
| H  | 1.06986300  | -3.15841000 | -3.69888300 |
| C  | 4.57836600  | -0.01937900 | 0.79074900  |
| C  | 5.14807000  | -1.25672700 | 1.11339000  |
| C  | 6.52257100  | -1.46512300 | 0.99131700  |
| C  | 7.35015400  | -0.43550700 | 0.54333700  |
| C  | 6.79404700  | 0.80376500  | 0.21999600  |
| C  | 5.42029300  | 1.00721700  | 0.34179600  |

|   |             |             |             |
|---|-------------|-------------|-------------|
| H | 4.50020800  | -2.06693800 | 1.47020700  |
| H | 6.95029100  | -2.43965600 | 1.25070400  |
| H | 8.42925600  | -0.59676600 | 0.44911100  |
| H | 7.43715600  | 1.62022200  | -0.12605900 |
| H | 4.98704200  | 1.98427400  | 0.09151800  |
| C | 2.43508500  | 0.13003200  | -0.52159200 |
| H | 3.02923600  | 0.81685300  | -1.14289200 |
| C | 3.08908600  | 0.19616800  | 0.87542500  |
| H | 2.66128200  | -0.56347400 | 1.55636000  |
| H | 2.89092600  | 1.18817100  | 1.32586500  |
| C | 0.97139700  | 1.38712700  | -1.10776100 |
| C | 1.23617000  | 2.73369800  | -0.47226200 |
| H | -0.13491400 | 1.21730100  | -1.19041700 |
| H | 1.34805200  | 1.32983300  | -2.13873000 |
| C | 0.63927100  | 3.88402000  | -1.27350000 |
| H | 0.81039600  | 2.75382200  | 0.55552400  |
| H | 2.32523600  | 2.89856900  | -0.34926700 |
| C | 0.88198800  | 5.23466300  | -0.62919200 |
| H | 1.06413100  | 3.86516100  | -2.29569300 |
| H | -0.44735500 | 3.71004300  | -1.39855000 |
| H | 0.44919100  | 6.05889900  | -1.21990000 |
| H | 0.43592000  | 5.28169800  | 0.37997200  |
| H | 1.96181600  | 5.43811500  | -0.51796400 |

### TS9c

Gibbs free energy before correction = -3558.68832000

Gibbs free energy after correction = -3558.67385384

|   |             |             |             |
|---|-------------|-------------|-------------|
| C | 1.64277100  | -1.47740800 | -2.32721500 |
| C | 2.50330000  | -1.27313000 | -1.08071000 |
| H | 2.30712800  | -2.10028900 | -0.37421000 |
| H | 3.56073700  | -1.40139100 | -1.39342900 |
| C | -0.95989400 | -0.60780300 | 2.98480100  |
| C | -1.72254300 | -1.66266400 | 1.06070600  |
| C | -2.91785200 | -2.07757600 | 1.70385800  |
| C | -3.08732000 | -1.71014600 | 3.06149200  |
| C | -2.11391700 | -0.97919100 | 3.70219200  |
| H | -0.16746200 | -0.02181600 | 3.46607600  |
| C | -1.46684000 | -1.98853800 | -0.32056400 |
| C | -3.88345600 | -2.81318200 | 0.97083000  |
| H | -4.00150800 | -2.01449500 | 3.58311800  |
| H | -2.21835000 | -0.68130600 | 4.74864600  |
| C | -3.63410800 | -3.12393100 | -0.34720400 |

|    |             |             |             |
|----|-------------|-------------|-------------|
| C  | -2.44307000 | -2.72366100 | -0.99505400 |
| H  | -4.80930900 | -3.11987500 | 1.46839600  |
| H  | -4.37083200 | -3.69856900 | -0.91906300 |
| H  | -2.27327300 | -3.00999900 | -2.03660600 |
| N  | -0.77177900 | -0.93773700 | 1.71950800  |
| N  | -0.23898400 | -1.57236100 | -0.78976400 |
| C  | 0.13766400  | -1.56777600 | -2.08319800 |
| O  | -0.62776600 | -1.64410400 | -3.06186000 |
| K  | -2.54999400 | 0.05428100  | -2.60509600 |
| Ni | 0.61192800  | -0.26157500 | 0.46653700  |
| I  | -3.39645800 | 1.77677100  | 0.21522900  |
| C  | 4.58834100  | -0.16655200 | 0.91387500  |
| C  | 5.17051600  | -1.40941300 | 1.18770600  |
| C  | 6.54379500  | -1.60492000 | 1.03428200  |
| C  | 7.35651800  | -0.55693700 | 0.60185000  |
| C  | 6.78707300  | 0.68767400  | 0.32564500  |
| C  | 5.41477100  | 0.87866000  | 0.47998900  |
| H  | 4.53306600  | -2.23511400 | 1.52769300  |
| H  | 6.98220800  | -2.58415900 | 1.25520100  |
| H  | 8.43448700  | -0.70841100 | 0.48197100  |
| H  | 7.41852500  | 1.51788400  | -0.00892600 |
| H  | 4.96971300  | 1.85934700  | 0.26711900  |
| C  | 2.41241300  | 0.06538000  | -0.34285900 |
| H  | 2.92855400  | 0.82595500  | -0.94915900 |
| C  | 3.10110900  | 0.04383200  | 1.03128600  |
| H  | 2.67842600  | -0.75543300 | 1.67150900  |
| H  | 2.91367700  | 1.00377700  | 1.54599600  |
| C  | 0.89303000  | 1.38959700  | -0.57153200 |
| C  | 1.38911700  | 2.65173700  | 0.09546900  |
| H  | -0.21583600 | 1.32233800  | -0.39954800 |
| H  | 1.02444400  | 1.42026100  | -1.66441600 |
| C  | 0.70081200  | 3.89849700  | -0.44824400 |
| H  | 1.21084500  | 2.59068000  | 1.18850700  |
| H  | 2.48447000  | 2.76543800  | -0.02852200 |
| C  | 1.18493700  | 5.17050400  | 0.22019100  |
| H  | 0.86924700  | 3.95435100  | -1.54119600 |
| H  | -0.39429200 | 3.79461700  | -0.32056000 |
| H  | 0.68156800  | 6.06600500  | -0.18025100 |
| H  | 0.99914100  | 5.14603800  | 1.30852600  |
| H  | 2.27130400  | 5.31024800  | 0.07848700  |
| H  | 1.87808000  | -2.50364800 | -2.68041200 |
| C  | 1.98534200  | -0.54203700 | -3.47906100 |



|   |            |             |             |
|---|------------|-------------|-------------|
| H | 3.06748100 | -0.56926800 | -3.69114900 |
| H | 1.45297300 | -0.83848700 | -4.39564300 |
| H | 1.71541500 | 0.50669400  | -3.26603500 |

## VIIe

Gibbs free energy before correction = -3558.73348000

Gibbs free energy after correction = -3558.71901384

|    |             |             |             |
|----|-------------|-------------|-------------|
| C  | -1.52477900 | 0.10993400  | 2.83495200  |
| C  | -2.40570600 | 0.12910400  | 1.58533900  |
| H  | -1.58908200 | 1.09617200  | 3.32938900  |
| H  | -2.41775400 | -0.90421000 | 1.10872800  |
| H  | -3.45538300 | 0.09999700  | 1.93542600  |
| C  | 0.52453900  | -2.60284600 | -1.98870600 |
| C  | 1.57750300  | -2.14221200 | 0.03304800  |
| C  | 2.80546900  | -2.67954400 | -0.43284100 |
| C  | 2.83614400  | -3.19481100 | -1.75260100 |
| C  | 1.70262200  | -3.15496400 | -2.52988600 |
| H  | -0.39294200 | -2.55627300 | -2.58753000 |
| C  | 1.47103300  | -1.57306600 | 1.35376200  |
| C  | 3.94102900  | -2.65958100 | 0.41598200  |
| H  | 3.77252100  | -3.61388000 | -2.13697900 |
| H  | 1.69634000  | -3.53898100 | -3.55323000 |
| C  | 3.83043500  | -2.12703700 | 1.68116400  |
| C  | 2.61222000  | -1.58734300 | 2.15430200  |
| H  | 4.88665600  | -3.07056300 | 0.04757800  |
| H  | 4.70084700  | -2.11752000 | 2.34611100  |
| H  | 2.55598800  | -1.18705500 | 3.17053700  |
| N  | 0.46112100  | -2.12169800 | -0.75935600 |
| N  | 0.21804000  | -1.09014400 | 1.67960500  |
| C  | -0.03439800 | -0.14700900 | 2.60259500  |
| O  | 0.81064800  | 0.48325200  | 3.26371500  |
| K  | 2.54833100  | 1.57483200  | 1.67324500  |
| Ni | -1.01007000 | -1.29151600 | 0.18066500  |
| I  | 2.48425100  | 1.17772500  | -1.73930900 |
| C  | -2.02261200 | -0.95103400 | 3.81329600  |
| H  | -3.05596600 | -0.74092200 | 4.13619900  |
| H  | -2.00963500 | -1.94870600 | 3.33989000  |
| H  | -1.38725300 | -0.99463500 | 4.71361100  |
| C  | -3.92186300 | 0.11556300  | -0.98462600 |
| C  | -3.91191300 | -1.23535400 | -1.35286200 |
| C  | -5.09960200 | -1.95839100 | -1.47356800 |
| C  | -6.32214500 | -1.33497400 | -1.22705000 |

|   |             |             |             |
|---|-------------|-------------|-------------|
| C | -6.34761900 | 0.01320100  | -0.86252600 |
| C | -5.15837800 | 0.73054500  | -0.74437800 |
| H | -2.94619600 | -1.72704200 | -1.55015500 |
| H | -5.06821800 | -3.01401300 | -1.76351200 |
| H | -7.25679900 | -1.89776800 | -1.32134500 |
| H | -7.30463800 | 0.51079300  | -0.67169600 |
| H | -5.18427900 | 1.79108700  | -0.46378800 |
| C | -2.29432100 | 1.31391700  | 0.60048300  |
| H | -3.06393600 | 2.04931000  | 0.91470600  |
| C | -2.64062600 | 0.88617800  | -0.83492000 |
| H | -1.79912500 | 0.27313400  | -1.23637600 |
| H | -2.68815300 | 1.78778400  | -1.47202000 |
| C | -0.96050900 | 2.06231000  | 0.63711900  |
| C | -0.91897000 | 3.32502100  | -0.21140100 |
| H | -0.14824800 | 1.37994800  | 0.30609700  |
| H | -0.74027200 | 2.34408200  | 1.68499800  |
| C | 0.27342200  | 4.21570800  | 0.09961700  |
| H | -0.89234200 | 3.06399700  | -1.28787500 |
| H | -1.85432700 | 3.90293000  | -0.06316200 |
| C | 0.33829100  | 5.44645500  | -0.78326200 |
| H | 0.24686300  | 4.50835000  | 1.16807100  |
| H | 1.20459900  | 3.62960000  | -0.04091400 |
| H | 1.19526500  | 6.09326900  | -0.53284600 |
| H | 0.43644900  | 5.16398300  | -1.84681200 |
| H | -0.57753200 | 6.05662000  | -0.68966300 |

## VIIIf

Gibbs free energy before correction = -3558.73077300

Gibbs free energy after correction = -3558.71630684

|   |             |             |             |
|---|-------------|-------------|-------------|
| C | -1.65619900 | 0.33954000  | 2.75855900  |
| C | -2.47074800 | 0.15124600  | 1.47069000  |
| H | -2.43753100 | -0.93465100 | 1.13287800  |
| H | -3.53505900 | 0.12975600  | 1.77528800  |
| C | 0.67772800  | -2.88491400 | -1.58409500 |
| C | 1.64346200  | -2.09214100 | 0.37792200  |
| C | 2.90629600  | -2.63794000 | 0.03047400  |
| C | 3.00123100  | -3.33672000 | -1.19880700 |
| C | 1.89428500  | -3.45756800 | -2.00553100 |
| H | -0.22122800 | -2.96458500 | -2.20718400 |
| C | 1.46817600  | -1.34808700 | 1.60050500  |
| C | 4.01040200  | -2.44841900 | 0.89945000  |
| H | 3.96536900  | -3.76700000 | -1.49135700 |

|    |             |             |             |
|----|-------------|-------------|-------------|
| H  | 1.93797100  | -3.98578000 | -2.96150000 |
| C  | 3.83553200  | -1.74604500 | 2.07133000  |
| C  | 2.58150600  | -1.19866200 | 2.42708200  |
| H  | 4.98315400  | -2.86715500 | 0.62141600  |
| H  | 4.68115400  | -1.60470800 | 2.75313700  |
| H  | 2.47354000  | -0.66440400 | 3.37528700  |
| N  | 0.55424500  | -2.23480200 | -0.44004100 |
| N  | 0.18516600  | -0.89150900 | 1.82486800  |
| C  | -0.14191800 | 0.15848000  | 2.60075800  |
| O  | 0.65449900  | 0.93230200  | 3.15982900  |
| K  | 2.41655400  | 1.84822700  | 1.47138900  |
| Ni | -0.98451500 | -1.35725700 | 0.33401500  |
| I  | 2.69726700  | 0.90339400  | -1.83157100 |
| C  | -4.05678800 | -0.19563300 | -1.00908600 |
| C  | -4.07263500 | -1.59285500 | -1.09938900 |
| C  | -5.27386500 | -2.30243000 | -1.07602400 |
| C  | -6.48419200 | -1.61935500 | -0.96044500 |
| C  | -6.48361200 | -0.22549600 | -0.87193900 |
| C  | -5.28066500 | 0.47850700  | -0.89819100 |
| H  | -3.11449000 | -2.12706800 | -1.18699400 |
| H  | -5.26333100 | -3.39517900 | -1.14959800 |
| H  | -7.42932000 | -2.17220900 | -0.94230200 |
| H  | -7.43081300 | 0.31788800  | -0.78568800 |
| H  | -5.28602200 | 1.57415300  | -0.83607800 |
| C  | -2.36182100 | 1.18975300  | 0.33527900  |
| H  | -3.10490800 | 1.98192100  | 0.56697000  |
| C  | -2.76079700 | 0.56353900  | -1.01090500 |
| H  | -1.94042700 | -0.12115000 | -1.33109100 |
| H  | -2.80948800 | 1.36087100  | -1.77426100 |
| C  | -1.01241000 | 1.90017700  | 0.20448500  |
| C  | -1.01881600 | 3.07440600  | -0.76557000 |
| H  | -0.23792700 | 1.16670500  | -0.10602300 |
| H  | -0.71218300 | 2.27973900  | 1.19951000  |
| C  | 0.16437000  | 4.01311400  | -0.58619100 |
| H  | -1.02742700 | 2.71014700  | -1.81178300 |
| H  | -1.95830000 | 3.65080300  | -0.63969800 |
| C  | 0.15822600  | 5.16459200  | -1.57248800 |
| H  | 0.16892400  | 4.40178100  | 0.45227100  |
| H  | 1.10419000  | 3.43714000  | -0.71273000 |
| H  | 1.01120200  | 5.84644400  | -1.42120900 |
| H  | 0.20989400  | 4.79553900  | -2.61218500 |
| H  | -0.76576700 | 5.76300000  | -1.48351500 |

|   |             |             |            |
|---|-------------|-------------|------------|
| H | -1.94506100 | -0.51803500 | 3.40076700 |
| C | -2.03529600 | 1.60686500  | 3.50410200 |
| H | -3.12392000 | 1.63574300  | 3.67965900 |
| H | -1.53307400 | 1.65624400  | 4.48251400 |
| H | -1.76294500 | 2.52309000  | 2.95367700 |

## TS6b

Gibbs free energy before correction = -3103.33482600

Gibbs free energy after correction = -3103.32035976

|    |             |             |             |
|----|-------------|-------------|-------------|
| C  | 1.21623500  | 3.23154800  | 0.38303300  |
| C  | -0.29968500 | 3.35365800  | 0.35178800  |
| H  | 1.58645000  | 3.64930000  | 1.33624200  |
| H  | -0.72811900 | 3.01106100  | 1.31357600  |
| H  | -0.56026400 | 4.43028000  | 0.27609100  |
| C  | -1.21907600 | -2.28833300 | 0.23510600  |
| C  | 0.87151800  | -1.46688100 | -0.42389700 |
| C  | 1.41680000  | -2.78804300 | -0.52727000 |
| C  | 0.56009300  | -3.87510200 | -0.20434300 |
| C  | -0.75942200 | -3.59019400 | 0.20300100  |
| H  | -2.24606000 | -2.07058900 | 0.54213300  |
| C  | 1.68862600  | -0.34077600 | -0.64579300 |
| C  | 2.76440700  | -2.92036900 | -0.94453500 |
| H  | 0.93748100  | -4.90241000 | -0.25734100 |
| H  | -1.44193700 | -4.39745300 | 0.49005700  |
| C  | 3.52559900  | -1.79403900 | -1.28249800 |
| C  | 3.00090100  | -0.50805500 | -1.13671800 |
| H  | 3.18646100  | -3.92785800 | -1.04300900 |
| H  | 4.54671500  | -1.92194000 | -1.66111800 |
| H  | 3.60351200  | 0.37295900  | -1.38126900 |
| N  | -0.44327300 | -1.21590400 | -0.10559500 |
| N  | 1.07138400  | 0.89637000  | -0.38434300 |
| C  | 1.75830300  | 1.81164600  | 0.32796400  |
| O  | 2.85587800  | 1.59405600  | 0.88331900  |
| K  | 3.69709000  | -0.66258800 | 1.73575300  |
| Ni | -0.85583900 | 0.69919800  | -0.33629300 |
| C  | -2.74301800 | 0.35248900  | -0.04709200 |
| C  | -3.51291400 | -0.33957100 | -0.99528000 |
| C  | -4.63022900 | -1.08185700 | -0.61233200 |
| C  | -5.00917200 | -1.14294700 | 0.73062800  |
| C  | -4.26148200 | -0.44695400 | 1.68468300  |
| C  | -3.14999300 | 0.30144400  | 1.29781300  |

|   |             |             |             |
|---|-------------|-------------|-------------|
| H | -3.23122700 | -0.29443900 | -2.05574200 |
| H | -5.21245000 | -1.61703300 | -1.37132800 |
| H | -5.88928400 | -1.72108900 | 1.03179400  |
| H | -4.55361400 | -0.47938400 | 2.74065800  |
| H | -2.58900700 | 0.86777500  | 2.05416500  |
| C | -0.94546000 | 2.58624400  | -0.76421100 |
| H | -0.51058300 | 2.70830100  | -1.76693900 |
| C | -2.29460800 | 2.17833700  | -0.68432400 |
| H | -2.85344100 | 2.08079800  | -1.62232900 |
| H | -2.89587300 | 2.59398400  | 0.13438300  |
| C | 1.88186500  | 4.01235300  | -0.75039200 |
| H | 1.60136100  | 5.07870800  | -0.71202200 |
| H | 2.98021300  | 3.94779300  | -0.68026700 |
| H | 1.58891100  | 3.61957400  | -1.73982800 |

### TS6c

Gibbs free energy before correction = -3103.33550200

Gibbs free energy after correction = -3103.32103576

|   |             |             |             |
|---|-------------|-------------|-------------|
| C | 1.22130700  | 3.25161100  | -0.12935900 |
| C | -0.29577900 | 3.35413000  | -0.11945300 |
| H | 1.56022300  | 3.58752300  | -1.13418400 |
| H | -0.67929300 | 3.12740100  | 0.89652600  |
| H | -0.57078700 | 4.41249700  | -0.30989400 |
| C | -1.20552000 | -2.25716700 | 0.44146300  |
| C | 0.86229100  | -1.51763700 | -0.37166300 |
| C | 1.40602500  | -2.84317600 | -0.34514500 |
| C | 0.56141900  | -3.88582400 | 0.12418200  |
| C | -0.74470200 | -3.55521000 | 0.54000400  |
| H | -2.22277400 | -2.00397000 | 0.75410800  |
| C | 1.66913500  | -0.42318700 | -0.74265800 |
| C | 2.73947600  | -3.02396900 | -0.78858100 |
| H | 0.93858600  | -4.91340500 | 0.17366100  |
| H | -1.41595300 | -4.32429500 | 0.93732600  |
| C | 3.48725500  | -1.94308000 | -1.27301300 |
| C | 2.96551600  | -0.64782500 | -1.25367100 |
| H | 3.15965400  | -4.03704900 | -0.78869000 |
| H | 4.49609600  | -2.11361900 | -1.66744500 |
| H | 3.56035500  | 0.19894500  | -1.61142400 |
| N | -0.44238200 | -1.23152900 | -0.04156000 |
| N | 1.05764100  | 0.83618300  | -0.60156300 |
| C | 1.77251000  | 1.83156000  | -0.03583500 |
| O | 2.88671700  | 1.66715400  | 0.50220200  |

|    |             |             |             |
|----|-------------|-------------|-------------|
| K  | 3.73964700  | -0.49060000 | 1.59396300  |
| Ni | -0.86343800 | 0.64285500  | -0.47758300 |
| C  | -2.74342400 | 0.33996100  | -0.10073500 |
| C  | -3.54024600 | -0.46118300 | -0.93385300 |
| C  | -4.64492800 | -1.14822500 | -0.43000600 |
| C  | -4.98320700 | -1.04451100 | 0.92110600  |
| C  | -4.20776600 | -0.23949800 | 1.76051500  |
| C  | -3.11002200 | 0.45415300  | 1.25211000  |
| H  | -3.29018700 | -0.54706500 | -1.99969400 |
| H  | -5.24914600 | -1.77027800 | -1.10039900 |
| H  | -5.85329700 | -1.57921100 | 1.31678800  |
| H  | -4.46779000 | -0.14243900 | 2.82092200  |
| H  | -2.52791300 | 1.10750600  | 1.91667100  |
| C  | -0.96404700 | 2.46200900  | -1.11967400 |
| H  | -0.53769000 | 2.47197000  | -2.13428500 |
| C  | -2.31174600 | 2.06637000  | -0.97117600 |
| H  | -2.88329600 | 1.85705500  | -1.88294800 |
| H  | -2.90168800 | 2.58096200  | -0.20200900 |
| C  | 1.83815800  | 4.16723700  | 0.91206900  |
| H  | 2.93593000  | 4.18038900  | 0.84794700  |
| H  | 1.47189700  | 5.20002200  | 0.78627900  |
| H  | 1.56925200  | 3.83947000  | 1.93225800  |

## Vc

Gibbs free energy before correction = -3103.33926000

Gibbs free energy after correction = -3103.32479376

|   |             |             |             |
|---|-------------|-------------|-------------|
| C | 1.13915400  | 3.23111700  | 0.48296500  |
| C | -0.35955300 | 3.36733800  | 0.26809700  |
| H | 1.38676400  | 3.58312100  | 1.50004700  |
| H | -0.91618700 | 3.03153300  | 1.16321300  |
| H | -0.60085200 | 4.44318200  | 0.15065600  |
| C | -1.12355000 | -2.33774500 | 0.27786000  |
| C | 0.91919700  | -1.43732400 | -0.43356700 |
| C | 1.51493700  | -2.73626000 | -0.53403700 |
| C | 0.71119400  | -3.85552200 | -0.18532600 |
| C | -0.60680800 | -3.61760400 | 0.25206200  |
| H | -2.15171600 | -2.16616800 | 0.60664400  |
| C | 1.69097400  | -0.28488400 | -0.66279900 |
| C | 2.86083300  | -2.81742700 | -0.96946400 |
| H | 1.12958900  | -4.86675900 | -0.23527000 |
| H | -1.24885100 | -4.44688100 | 0.56811600  |
| C | 3.57721900  | -1.66419000 | -1.31325200 |

|    |             |             |             |
|----|-------------|-------------|-------------|
| C  | 3.00542300  | -0.39950500 | -1.15938500 |
| H  | 3.31895600  | -3.80865300 | -1.07075000 |
| H  | 4.59913600  | -1.75416100 | -1.70022400 |
| H  | 3.57155000  | 0.50656800  | -1.40095600 |
| N  | -0.40398700 | -1.23445100 | -0.10197700 |
| N  | 1.03624600  | 0.92776200  | -0.38428500 |
| C  | 1.68485300  | 1.81486800  | 0.39545900  |
| O  | 2.75698100  | 1.57982000  | 0.99154400  |
| K  | 3.71136100  | -0.67030800 | 1.71610300  |
| Ni | -0.91615600 | 0.63188300  | -0.37604400 |
| C  | -2.71390600 | 0.11160300  | -0.01586000 |
| C  | -3.54108500 | -0.54676300 | -0.93602800 |
| C  | -4.76459100 | -1.09558000 | -0.54433500 |
| C  | -5.19193500 | -0.99040000 | 0.78136400  |
| C  | -4.38782100 | -0.31932200 | 1.70515100  |
| C  | -3.16711700 | 0.23332400  | 1.30619200  |
| H  | -3.21975000 | -0.64974900 | -1.98187000 |
| H  | -5.39018000 | -1.61304200 | -1.28155400 |
| H  | -6.15019700 | -1.42168200 | 1.09110300  |
| H  | -4.71510900 | -0.22175500 | 2.74727900  |
| H  | -2.55521200 | 0.76449500  | 2.04959200  |
| C  | -0.86736500 | 2.61905500  | -0.92456400 |
| H  | -0.24838200 | 2.63385600  | -1.83075300 |
| C  | -2.16749300 | 2.18833400  | -1.02408400 |
| H  | -2.58631500 | 1.88774300  | -1.99143700 |
| H  | -2.89843900 | 2.47720600  | -0.26069900 |
| C  | 1.93686900  | 4.08128900  | -0.50641800 |
| H  | 1.66153800  | 5.14597600  | -0.42086900 |
| H  | 3.01913500  | 3.99323900  | -0.31861600 |
| H  | 1.75279500  | 3.76692700  | -1.54909700 |

## Vd

Gibbs free energy before correction = -3103.34012800

Gibbs free energy after correction = -3103.32566176

|   |             |             |             |
|---|-------------|-------------|-------------|
| C | 1.14729300  | 3.28059800  | -0.00660100 |
| C | -0.35953000 | 3.36735800  | -0.17379900 |
| H | 1.60153400  | 3.70881000  | -0.92696500 |
| H | -0.86654300 | 3.12861600  | 0.78273000  |
| H | -0.62341600 | 4.42121900  | -0.39480700 |
| C | -1.06665900 | -2.25822300 | 0.60366400  |
| C | 0.92054700  | -1.46278600 | -0.35016800 |
| C | 1.51621000  | -2.76501900 | -0.32198300 |

|    |             |             |             |
|----|-------------|-------------|-------------|
| C  | 0.74328300  | -3.82759600 | 0.22089400  |
| C  | -0.54412900 | -3.53126800 | 0.71197500  |
| H  | -2.07178700 | -2.04052800 | 0.97464500  |
| C  | 1.66928200  | -0.34836600 | -0.76829800 |
| C  | 2.83147900  | -2.90338600 | -0.83062300 |
| H  | 1.16366400  | -4.83775200 | 0.27593200  |
| H  | -1.15713500 | -4.31025700 | 1.17804600  |
| C  | 3.51641900  | -1.80406400 | -1.36326600 |
| C  | 2.94918500  | -0.52798700 | -1.33105800 |
| H  | 3.28846800  | -3.90030400 | -0.83582700 |
| H  | 4.51153800  | -1.94395100 | -1.80179100 |
| H  | 3.49555200  | 0.33848200  | -1.71825700 |
| N  | -0.37983600 | -1.21699700 | 0.03540700  |
| N  | 1.02445400  | 0.88985900  | -0.59386500 |
| C  | 1.71862600  | 1.86817800  | 0.02110500  |
| O  | 2.83576700  | 1.70333100  | 0.55375800  |
| K  | 3.82129800  | -0.45579200 | 1.50375100  |
| Ni | -0.92104900 | 0.58747200  | -0.47835200 |
| C  | -2.70999800 | 0.07993500  | -0.05632400 |
| C  | -3.49517200 | -0.72345000 | -0.89466600 |
| C  | -4.70703900 | -1.26018300 | -0.45381600 |
| C  | -5.16535600 | -0.99697800 | 0.83926100  |
| C  | -4.40465600 | -0.18009600 | 1.67860200  |
| C  | -3.19570300 | 0.35977100  | 1.22957700  |
| H  | -3.14812900 | -0.95214700 | -1.91201200 |
| H  | -5.29909800 | -1.89293500 | -1.12592700 |
| H  | -6.11437100 | -1.41885200 | 1.18797200  |
| H  | -4.75728500 | 0.04291400  | 2.69278900  |
| H  | -2.61864900 | 1.00919900  | 1.90383500  |
| C  | -0.90000100 | 2.49136300  | -1.25726300 |
| H  | -0.30113000 | 2.41402600  | -2.17443100 |
| C  | -2.20025100 | 2.04937700  | -1.27111600 |
| H  | -2.64549000 | 1.64615900  | -2.18789000 |
| H  | -2.91009200 | 2.41896500  | -0.52288600 |
| C  | 1.61267500  | 4.10607600  | 1.17913200  |
| H  | 2.70967800  | 4.14343400  | 1.24409400  |
| H  | 1.23455600  | 5.13959900  | 1.10502700  |
| H  | 1.23535800  | 3.67993800  | 2.12605900  |

## **VIe**

Gibbs free energy before correction = -3103.36020700

Gibbs free energy after correction = -3103.34574076



|    |             |             |             |
|----|-------------|-------------|-------------|
| C  | 0.26176200  | 3.37393500  | 0.10011100  |
| C  | -1.24300700 | 3.13859100  | 0.15448200  |
| H  | 0.54724300  | 4.04245000  | 0.93194900  |
| H  | -1.53437900 | 2.90765000  | 1.19874300  |
| H  | -1.75326300 | 4.10153400  | -0.07642300 |
| C  | -0.62181300 | -2.71583000 | -0.30492900 |
| C  | 1.23416200  | -1.31184500 | -0.53211100 |
| C  | 2.12430000  | -2.42763600 | -0.66250100 |
| C  | 1.56001100  | -3.72895700 | -0.56541700 |
| C  | 0.17008500  | -3.84688700 | -0.39080600 |
| H  | -1.70676900 | -2.80316100 | -0.20515400 |
| C  | 1.73114900  | 0.01003500  | -0.60745900 |
| C  | 3.49688200  | -2.16886700 | -0.89749600 |
| H  | 2.20637100  | -4.60979800 | -0.65023800 |
| H  | -0.30644300 | -4.83192400 | -0.33978300 |
| C  | 3.95543000  | -0.85821700 | -1.06991700 |
| C  | 3.08754300  | 0.22779300  | -0.93895200 |
| H  | 4.18325400  | -3.01851300 | -0.99543600 |
| H  | 5.01007700  | -0.67886900 | -1.31069100 |
| H  | 3.45394400  | 1.25134700  | -1.07107100 |
| N  | -0.12375800 | -1.44887300 | -0.36130400 |
| N  | 0.78241300  | 1.02215900  | -0.41401700 |
| C  | 1.12628900  | 2.13347900  | 0.27766300  |
| O  | 2.15852000  | 2.23154100  | 0.97219600  |
| K  | 3.37677600  | 0.21756700  | 2.00259100  |
| Ni | -0.99218800 | 0.33466400  | -0.29957200 |
| C  | -3.20182900 | 0.28165700  | -0.06100700 |
| C  | -3.90053000 | -0.79893800 | -0.64925500 |
| C  | -4.07827800 | -1.98839200 | 0.03596400  |
| C  | -3.53230700 | -2.15380700 | 1.32290500  |
| C  | -2.79643900 | -1.13185800 | 1.89712400  |
| C  | -2.61575100 | 0.08628200  | 1.21120500  |
| H  | -4.35008200 | -0.65946100 | -1.63971700 |
| H  | -4.65045500 | -2.80221900 | -0.42192200 |
| H  | -3.68961200 | -3.09178200 | 1.86567000  |
| H  | -2.37796900 | -1.25146000 | 2.90214300  |
| H  | -2.20442500 | 0.94148300  | 1.76136000  |
| C  | -1.71939900 | 2.03893700  | -0.75796200 |
| H  | -1.40697600 | 2.22265900  | -1.80295700 |
| C  | -3.18602700 | 1.66852900  | -0.66865600 |
| H  | -3.67963600 | 1.63930400  | -1.65491600 |
| H  | -3.77282700 | 2.36550800  | -0.03543900 |

|   |            |            |             |
|---|------------|------------|-------------|
| C | 0.70116600 | 4.04499900 | -1.20131400 |
| H | 0.18932000 | 5.01350100 | -1.33631200 |
| H | 1.78807300 | 4.23728100 | -1.20093400 |
| H | 0.47793900 | 3.41676000 | -2.08044100 |

## Vif

Gibbs free energy before correction = -3103.36104700

Gibbs free energy after correction = -3103.34658076

|    |             |             |             |
|----|-------------|-------------|-------------|
| C  | 0.24989500  | 3.35716800  | -0.39927900 |
| C  | -1.24629500 | 3.10375300  | -0.25227900 |
| H  | 0.43594400  | 3.53843600  | -1.48032400 |
| H  | -1.48403800 | 2.98617200  | 0.82630900  |
| H  | -1.78481600 | 4.02788200  | -0.56122300 |
| C  | -0.59648700 | -2.75729300 | -0.13818000 |
| C  | 1.25361000  | -1.37290300 | -0.50511400 |
| C  | 2.14926500  | -2.49187100 | -0.51594500 |
| C  | 1.59060800  | -3.77994600 | -0.29098000 |
| C  | 0.20070600  | -3.88760400 | -0.11106600 |
| H  | -1.68138100 | -2.83902600 | -0.03216900 |
| C  | 1.74256600  | -0.06162100 | -0.71521900 |
| C  | 3.52259100  | -2.25159400 | -0.76354400 |
| H  | 2.24202600  | -4.66113300 | -0.28401500 |
| H  | -0.27130500 | -4.86525700 | 0.03513200  |
| C  | 3.97672100  | -0.96208800 | -1.05966200 |
| C  | 3.10301300  | 0.12692400  | -1.05050300 |
| H  | 4.21387700  | -3.10287300 | -0.76727200 |
| H  | 5.03383500  | -0.80095800 | -1.30216900 |
| H  | 3.47052900  | 1.13288500  | -1.27607200 |
| N  | -0.10343900 | -1.50006800 | -0.31953200 |
| N  | 0.78644400  | 0.95973500  | -0.63381100 |
| C  | 1.12976300  | 2.14995500  | -0.08018900 |
| O  | 2.15334200  | 2.31563100  | 0.61183700  |
| K  | 3.20832000  | 0.34429300  | 1.90025100  |
| Ni | -0.97963000 | 0.27139000  | -0.42410200 |
| C  | -3.18320700 | 0.22432500  | -0.13810300 |
| C  | -3.88689700 | -0.91702200 | -0.59008500 |
| C  | -4.03933600 | -2.02702800 | 0.22289700  |
| C  | -3.46240600 | -2.05054200 | 1.50675700  |
| C  | -2.72418200 | -0.96769800 | 1.95150800  |
| C  | -2.57017400 | 0.17137500  | 1.13526400  |
| H  | -4.35897900 | -0.88778900 | -1.57945300 |
| H  | -4.61490300 | -2.88868800 | -0.13163100 |

|   |             |             |             |
|---|-------------|-------------|-------------|
| H | -3.59869100 | -2.92612000 | 2.15010400  |
| H | -2.28352900 | -0.97565700 | 2.95415100  |
| H | -2.15574000 | 1.08321200  | 1.58220500  |
| C | -1.72728900 | 1.91351200  | -1.03506700 |
| H | -1.42151200 | 2.00559700  | -2.09550800 |
| C | -3.18806100 | 1.53788000  | -0.89200300 |
| H | -3.68758100 | 1.39628500  | -1.86546700 |
| H | -3.77890400 | 2.29349500  | -0.33392500 |
| C | 0.67839500  | 4.58728000  | 0.37875000  |
| H | 1.74025100  | 4.82914000  | 0.22054500  |
| H | 0.07798600  | 5.46254700  | 0.07834700  |
| H | 0.53390300  | 4.43887400  | 1.46347800  |

# 13. NMR Spectra

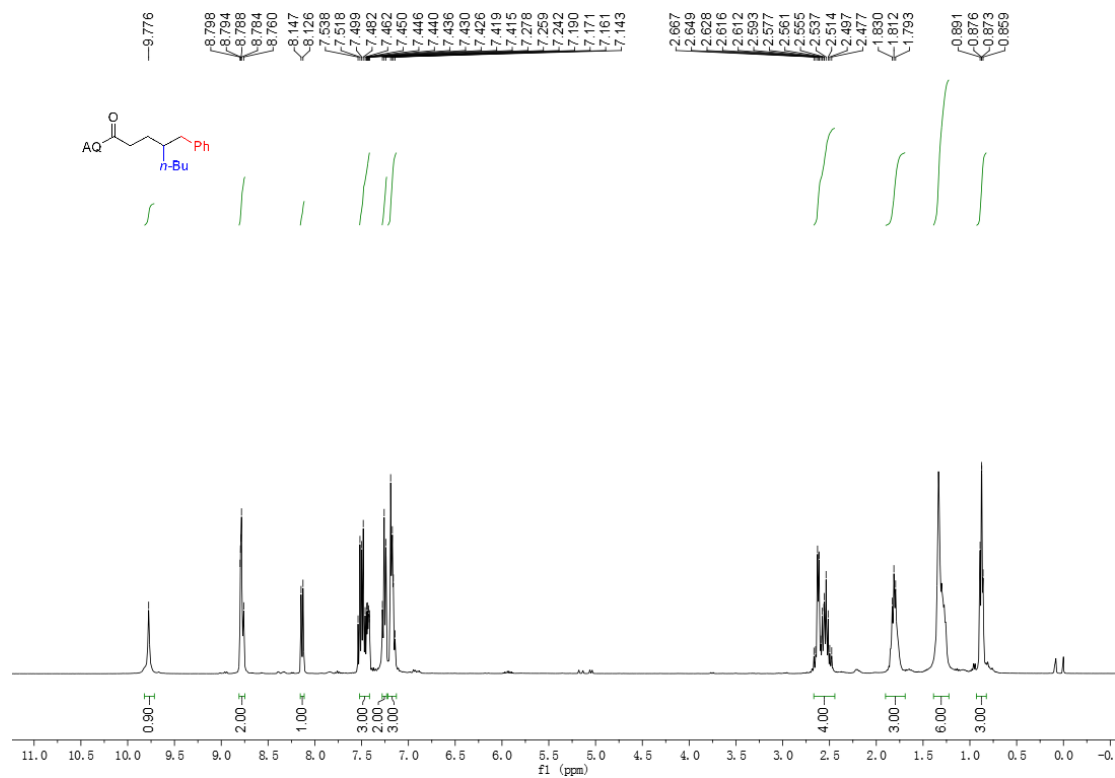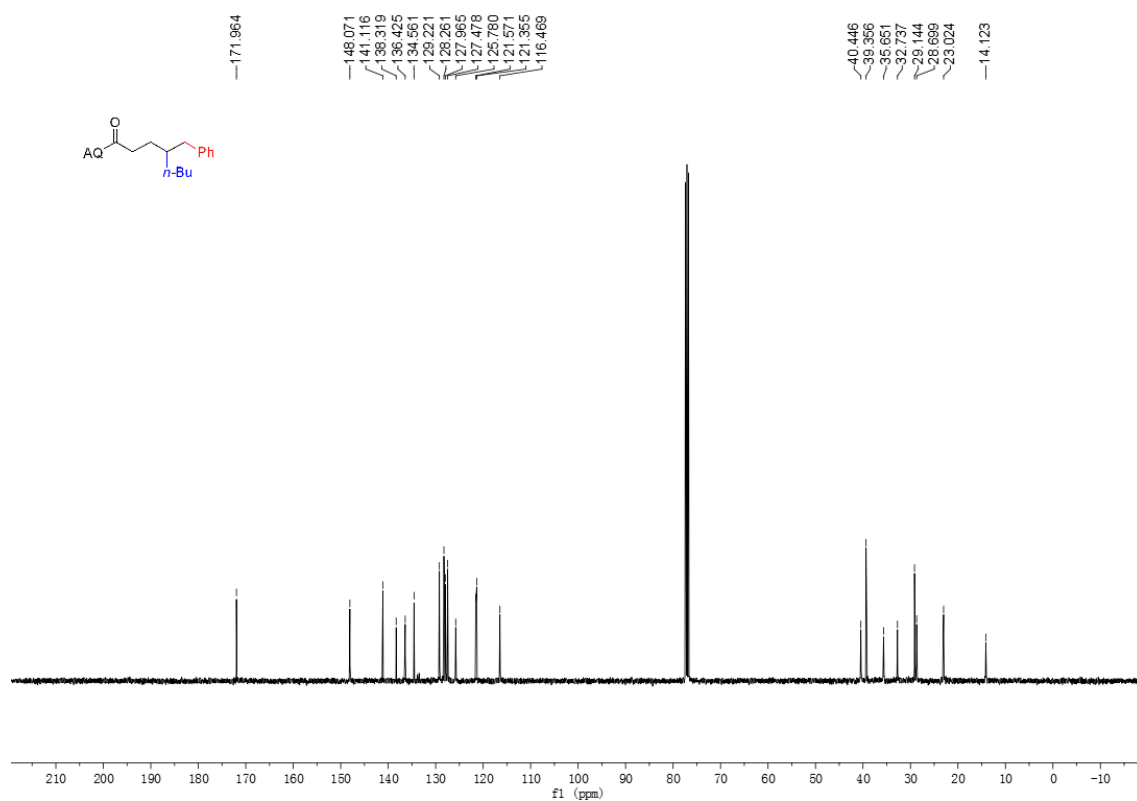

**Scheme 1.** <sup>1</sup>H NMR (400 MHz, CDCl<sub>3</sub>) and <sup>13</sup>C NMR (101 MHz, CDCl<sub>3</sub>) spectra of **2a**

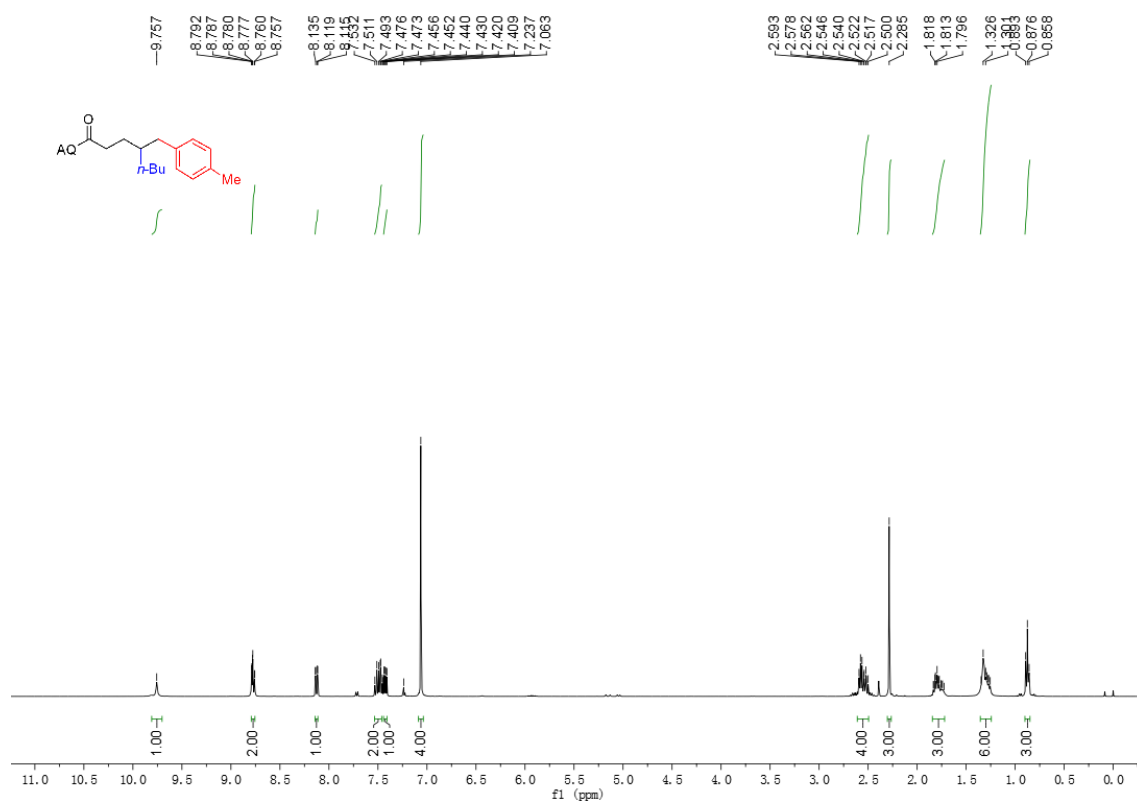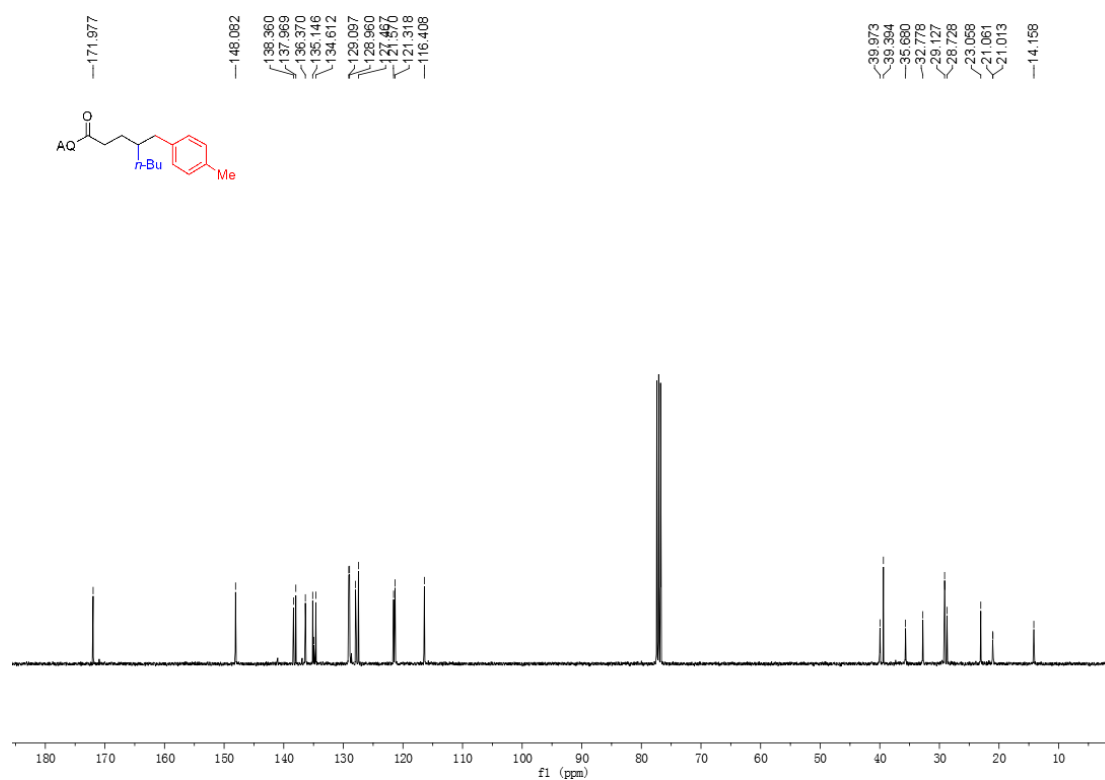

**Scheme 2.**  $^1\text{H}$  NMR (400 MHz,  $\text{CDCl}_3$ ) and  $^{13}\text{C}$  NMR (101 MHz,  $\text{CDCl}_3$ ) spectra of **2b**.

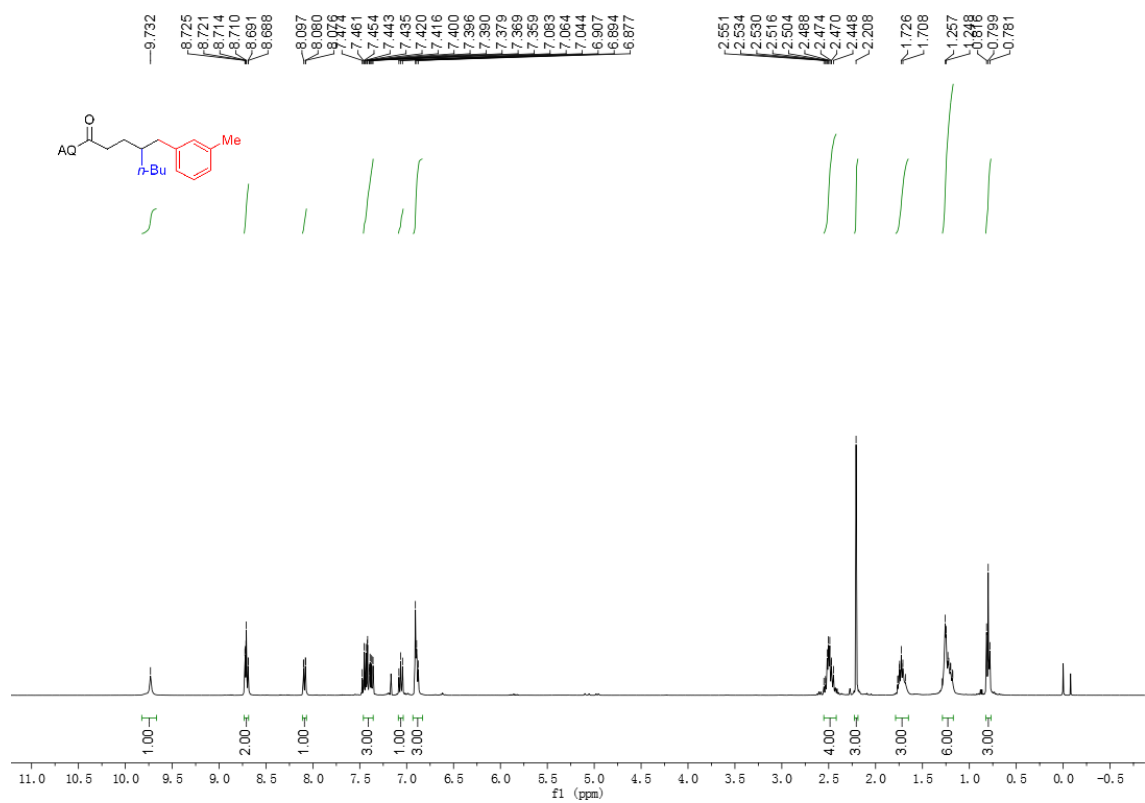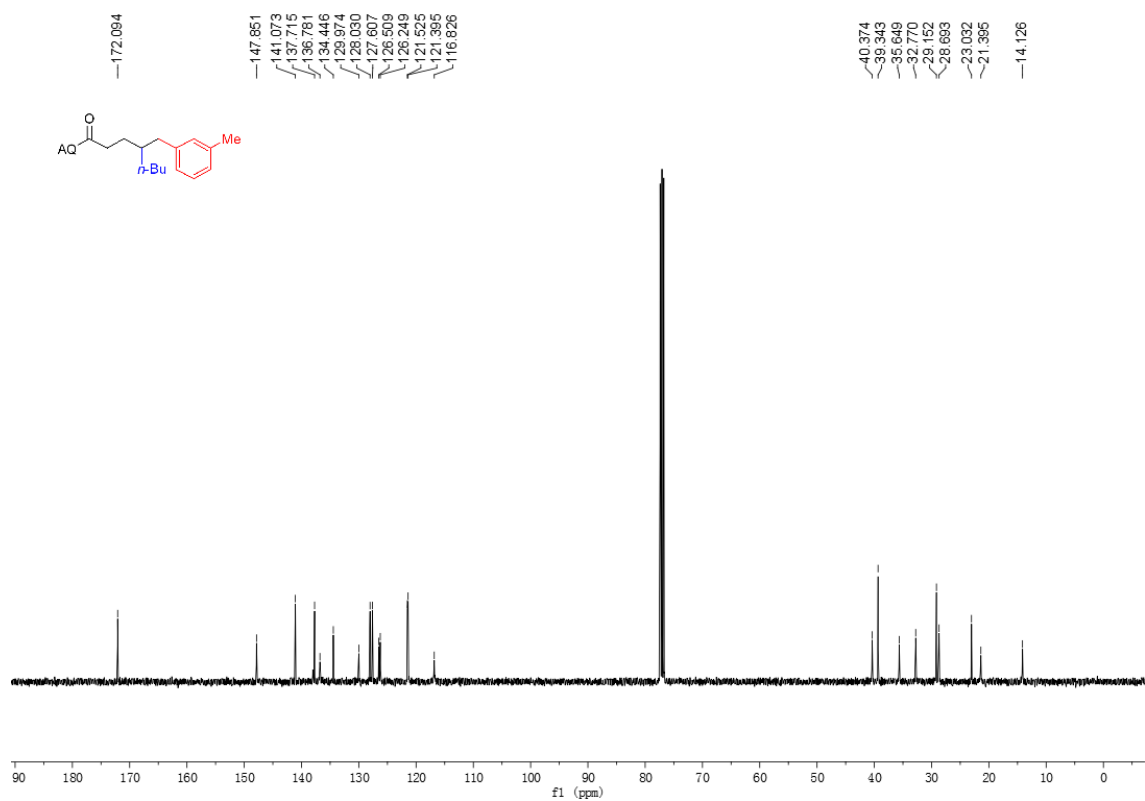

**Scheme 3.** <sup>1</sup>H NMR (400 MHz, CDCl<sub>3</sub>) and <sup>13</sup>C NMR (101 MHz, CDCl<sub>3</sub>) spectra of **2c**.

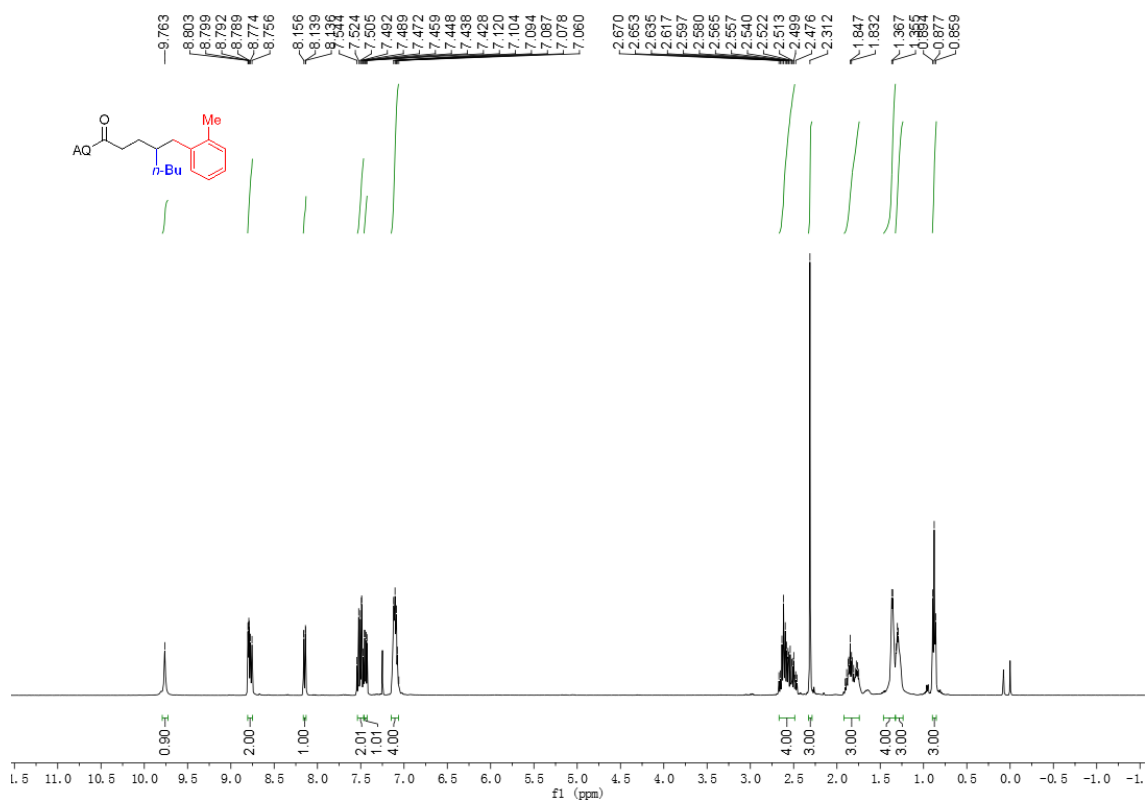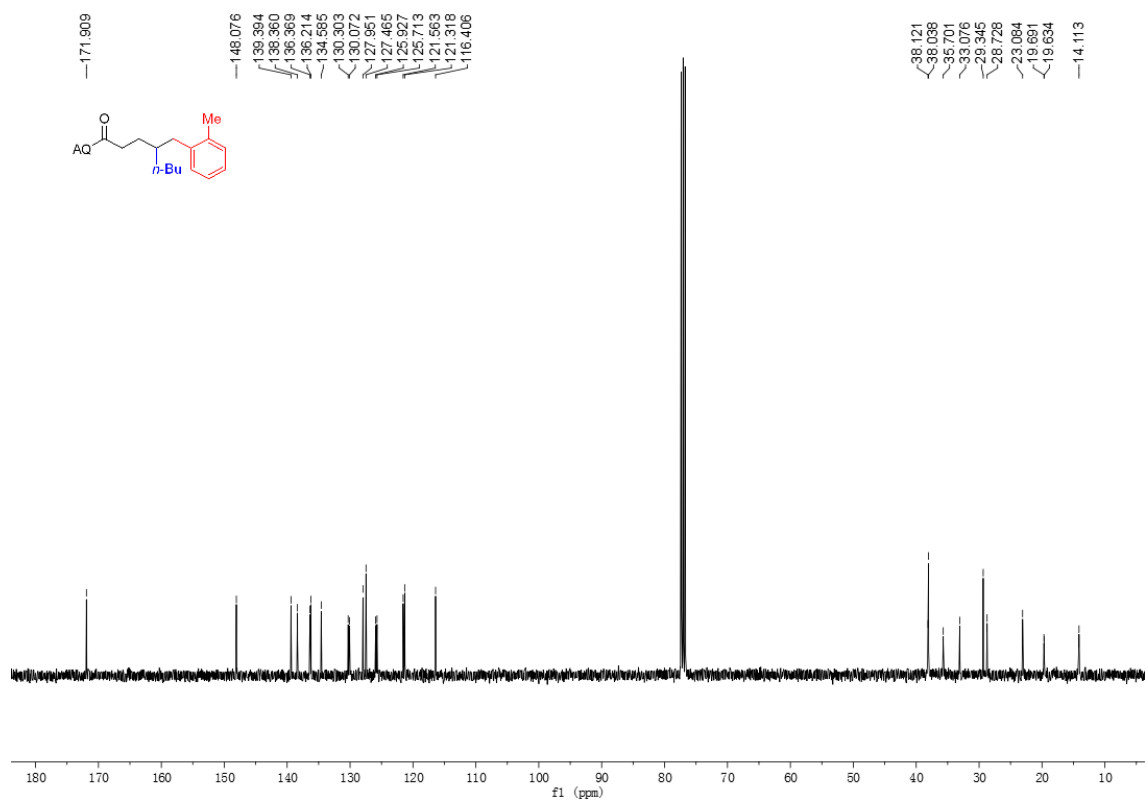

**Scheme 4.** <sup>1</sup>H NMR (400 MHz, CDCl<sub>3</sub>) and <sup>13</sup>C NMR (101 MHz, CDCl<sub>3</sub>) spectra of **2d**.

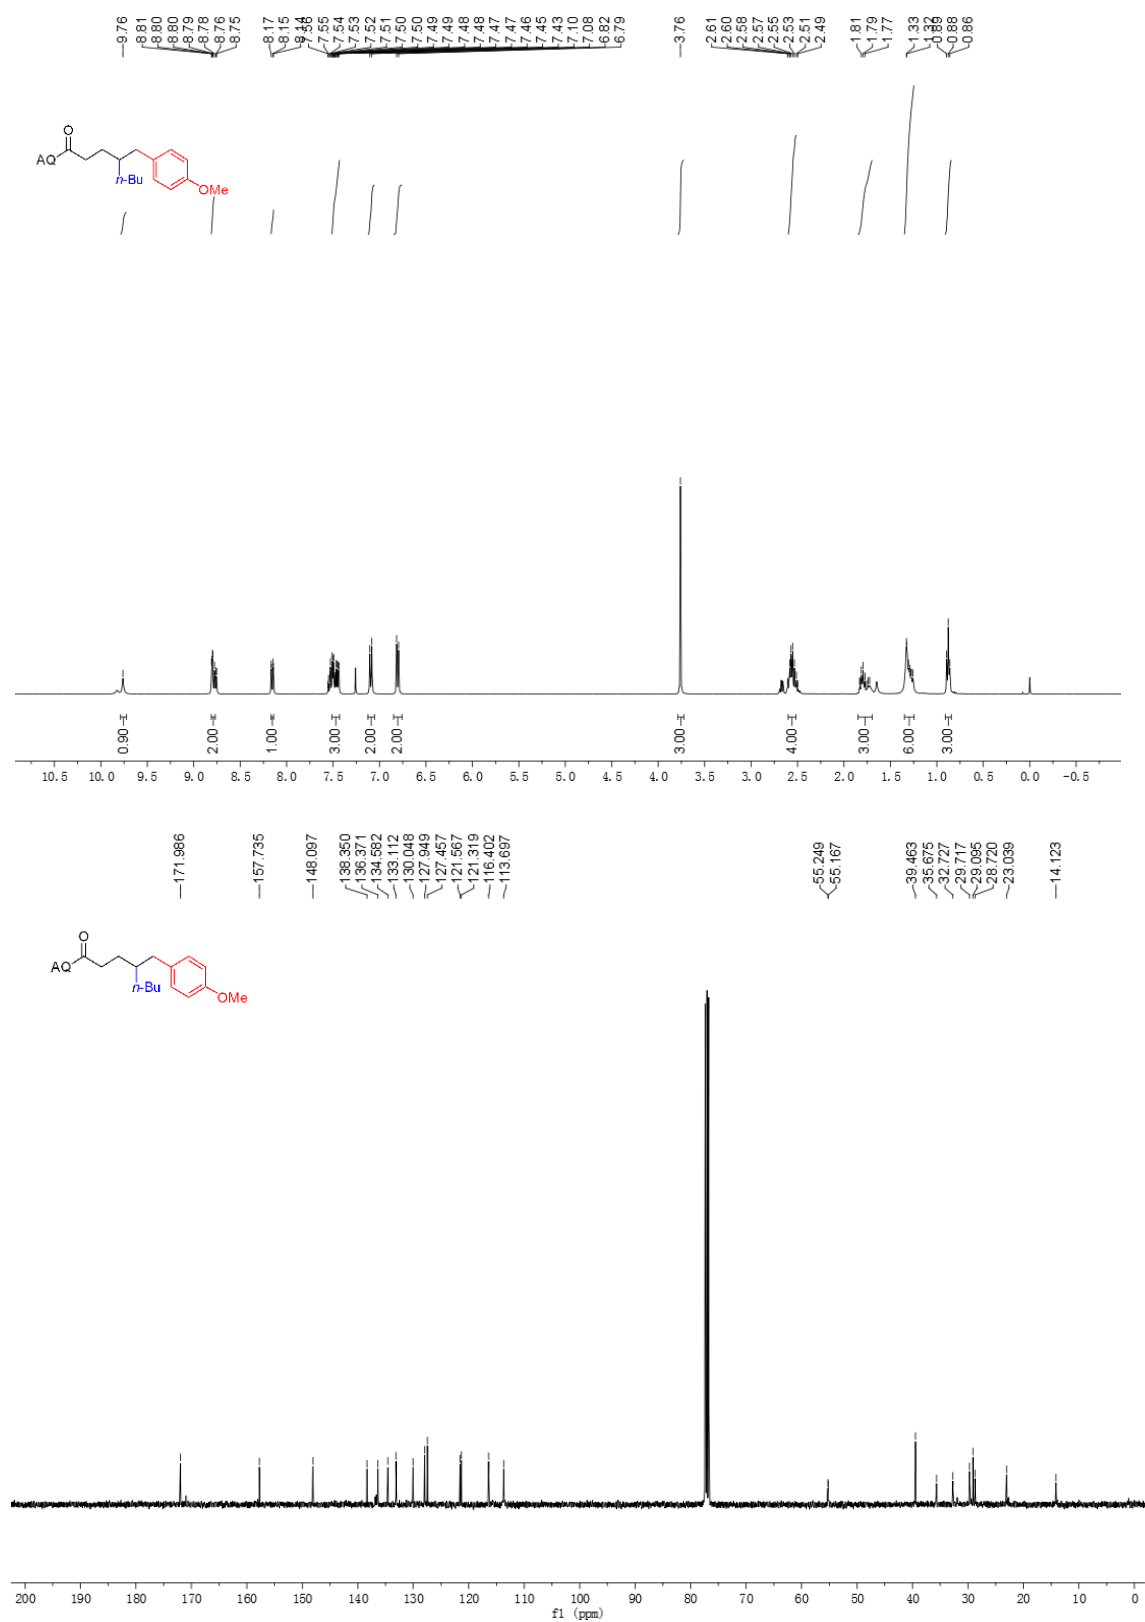

**Scheme 5.** <sup>1</sup>H NMR (400 MHz, CDCl<sub>3</sub>) and <sup>13</sup>C NMR (101 MHz, CDCl<sub>3</sub>) spectra of **2e**



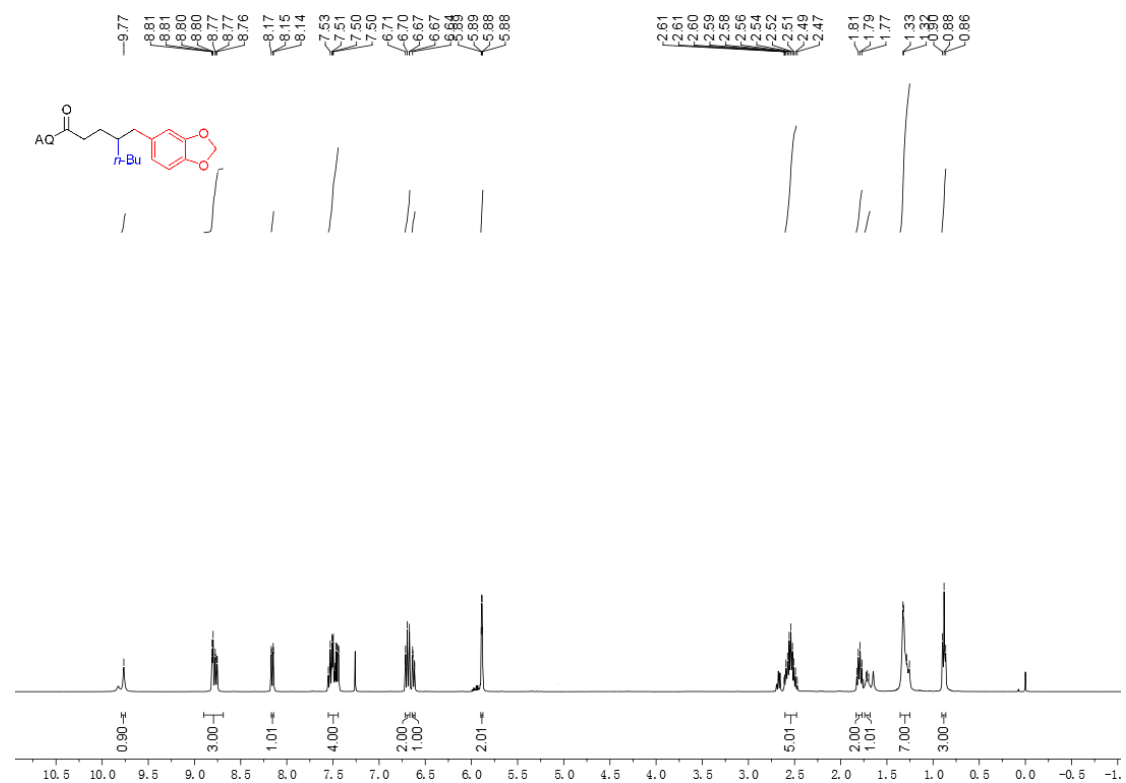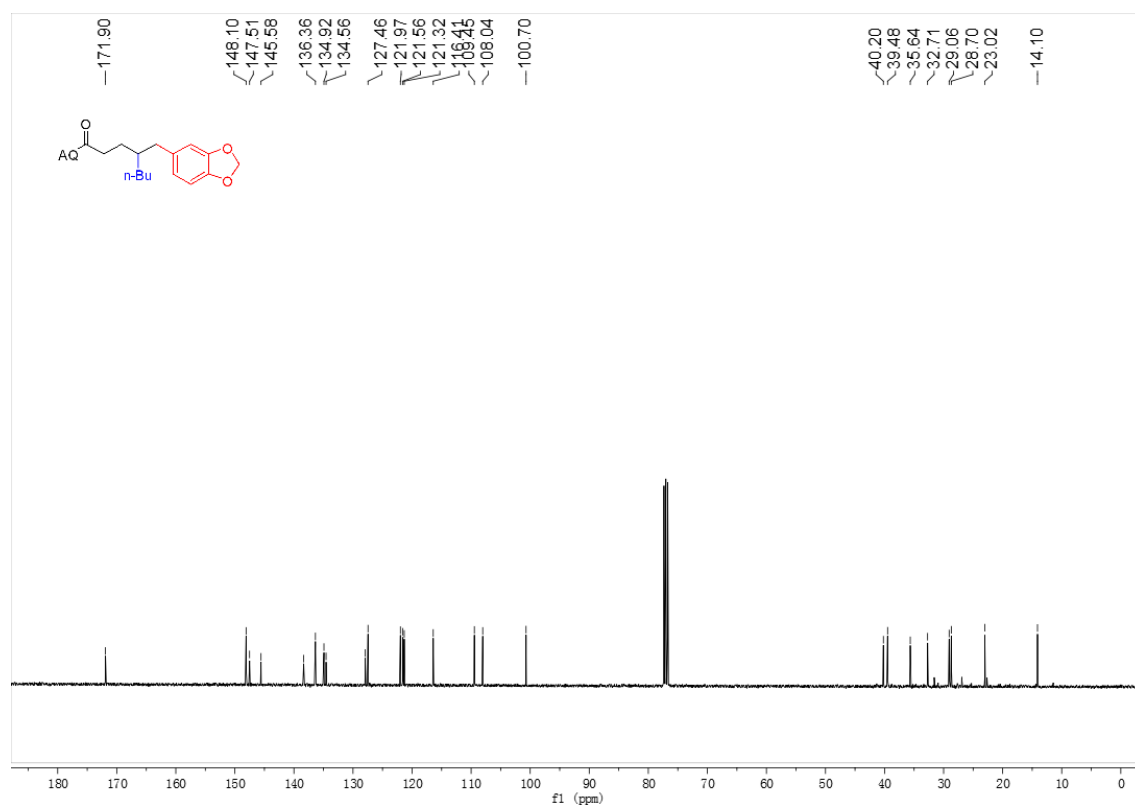

**Scheme 6.** <sup>1</sup>H NMR (400 MHz, CDCl<sub>3</sub>) and <sup>13</sup>C NMR (101 MHz, CDCl<sub>3</sub>) spectra of **2f**

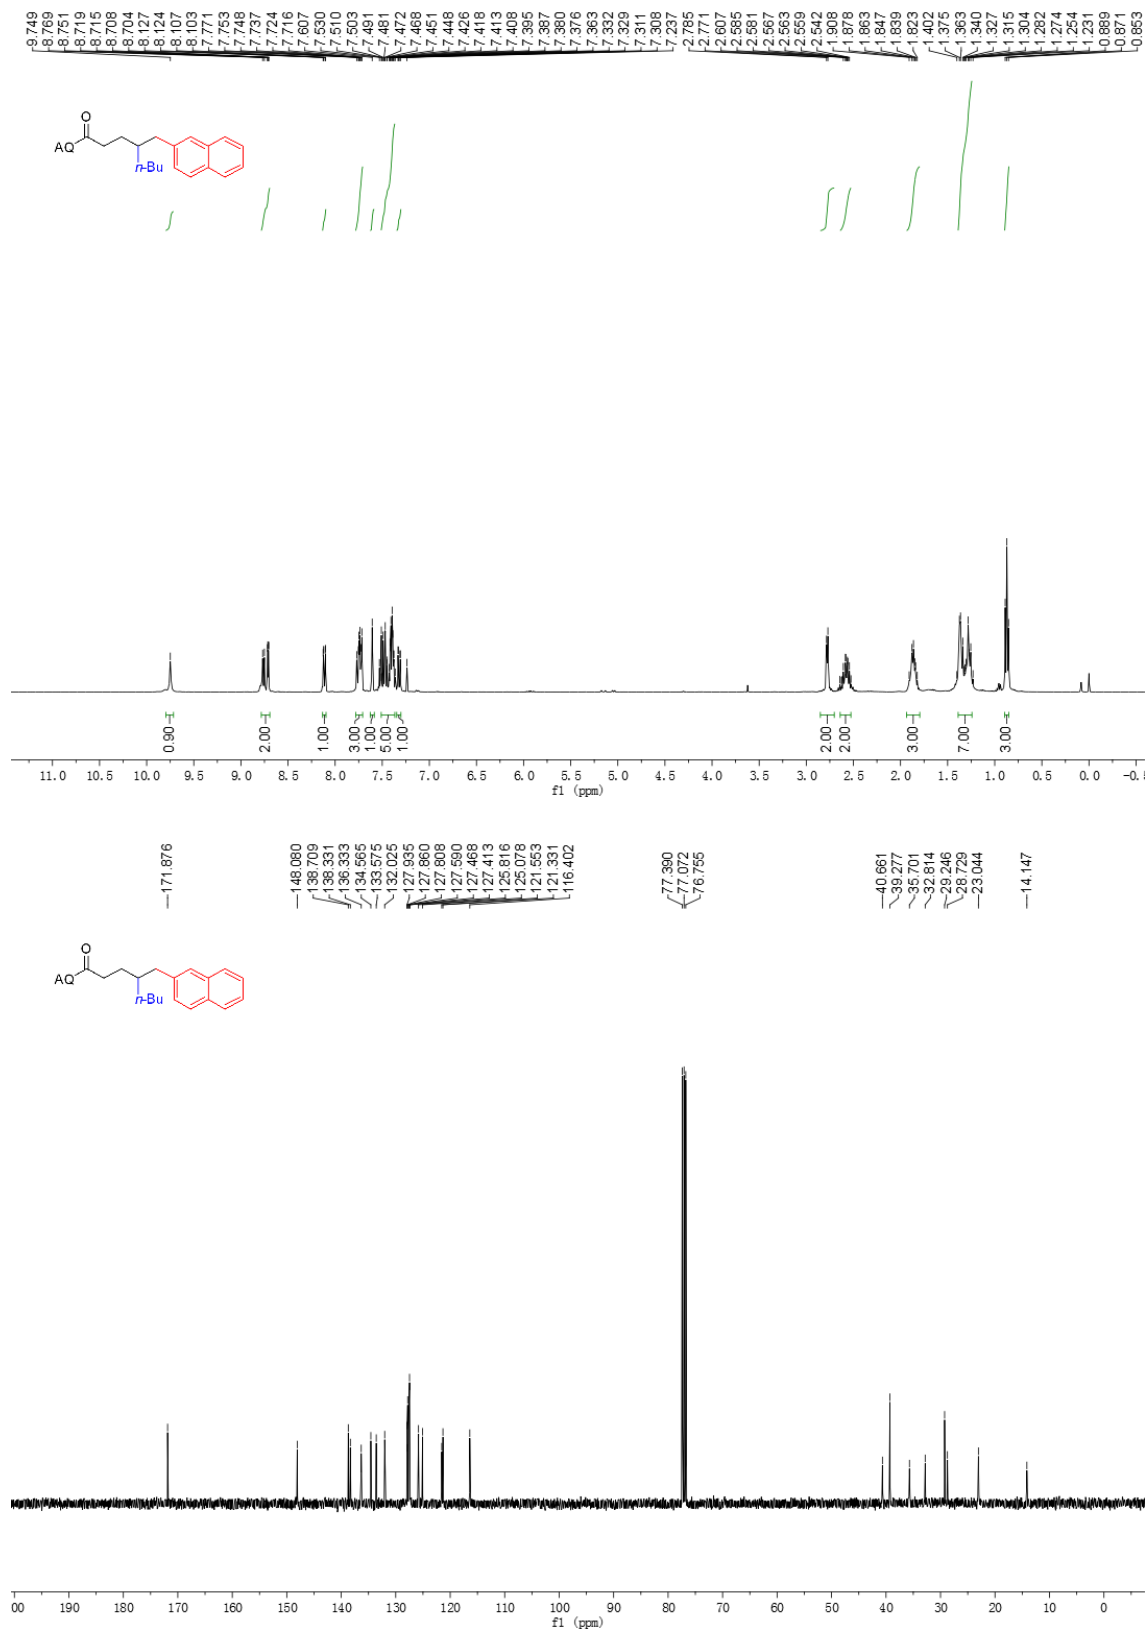

**Scheme 7.** <sup>1</sup>H NMR (400 MHz, CDCl<sub>3</sub>) and <sup>13</sup>C NMR (101 MHz, CDCl<sub>3</sub>) spectra of **2g**

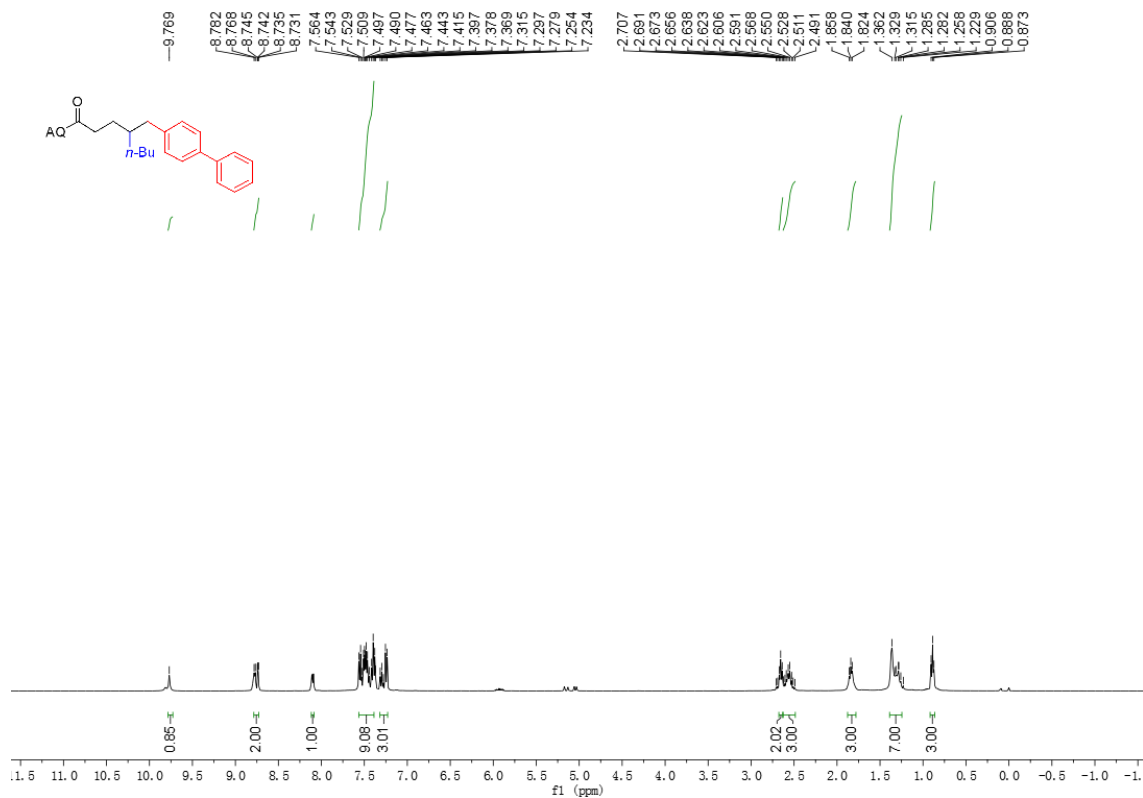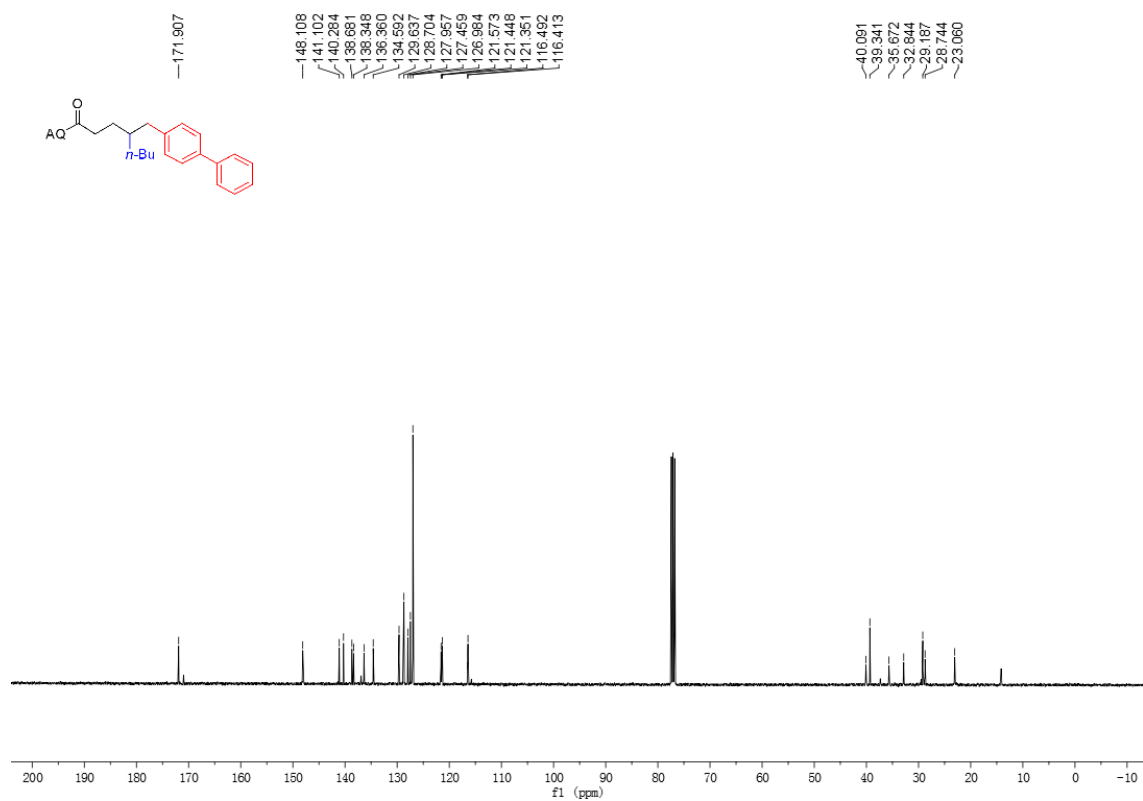

**Scheme 8.** <sup>1</sup>H NMR (400 MHz, CDCl<sub>3</sub>) and <sup>13</sup>C NMR (101 MHz, CDCl<sub>3</sub>) spectra of **2h**

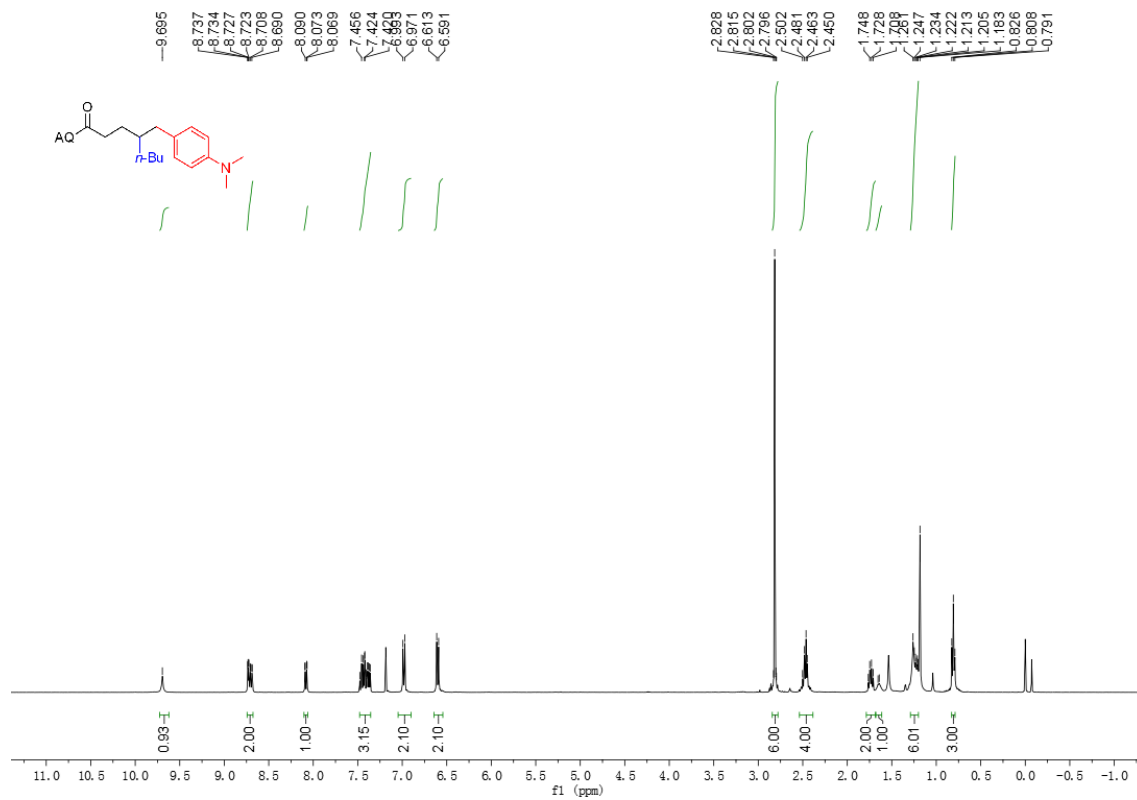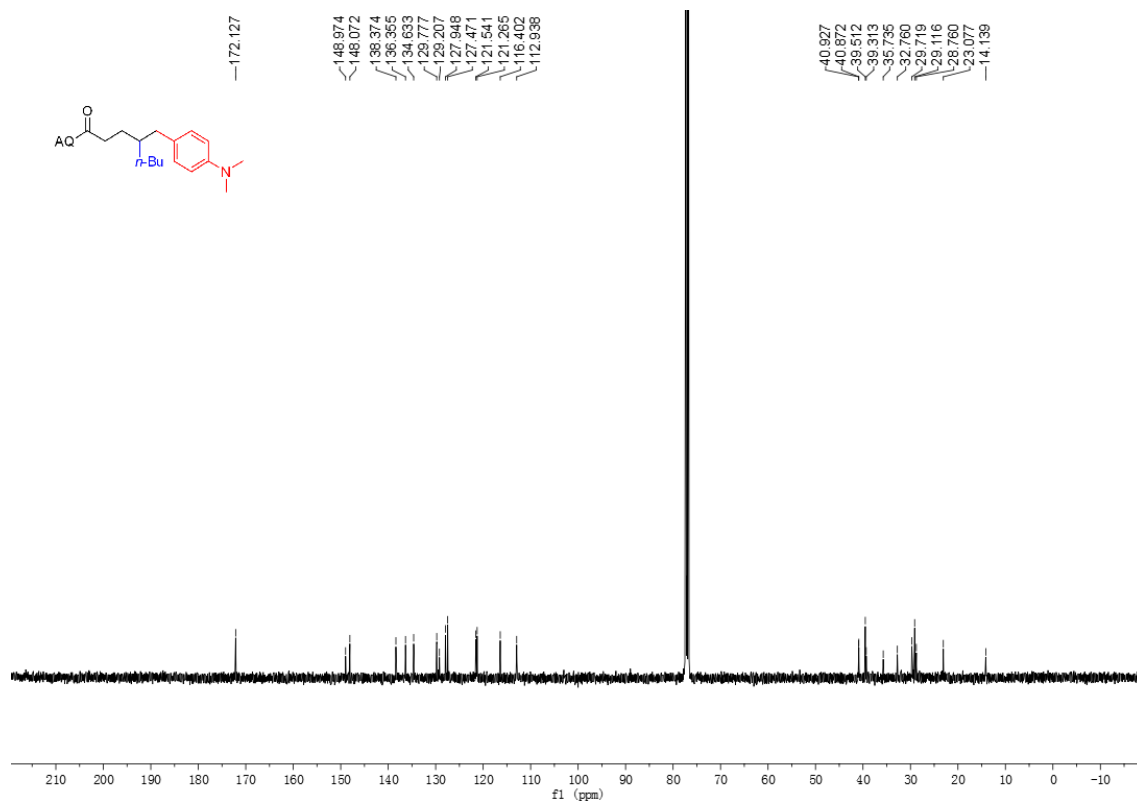

**Scheme 9.**  $^1\text{H}$  NMR (400 MHz,  $\text{CDCl}_3$ ) and  $^{13}\text{C}$  NMR (101 MHz,  $\text{CDCl}_3$ ) spectra of **2i**

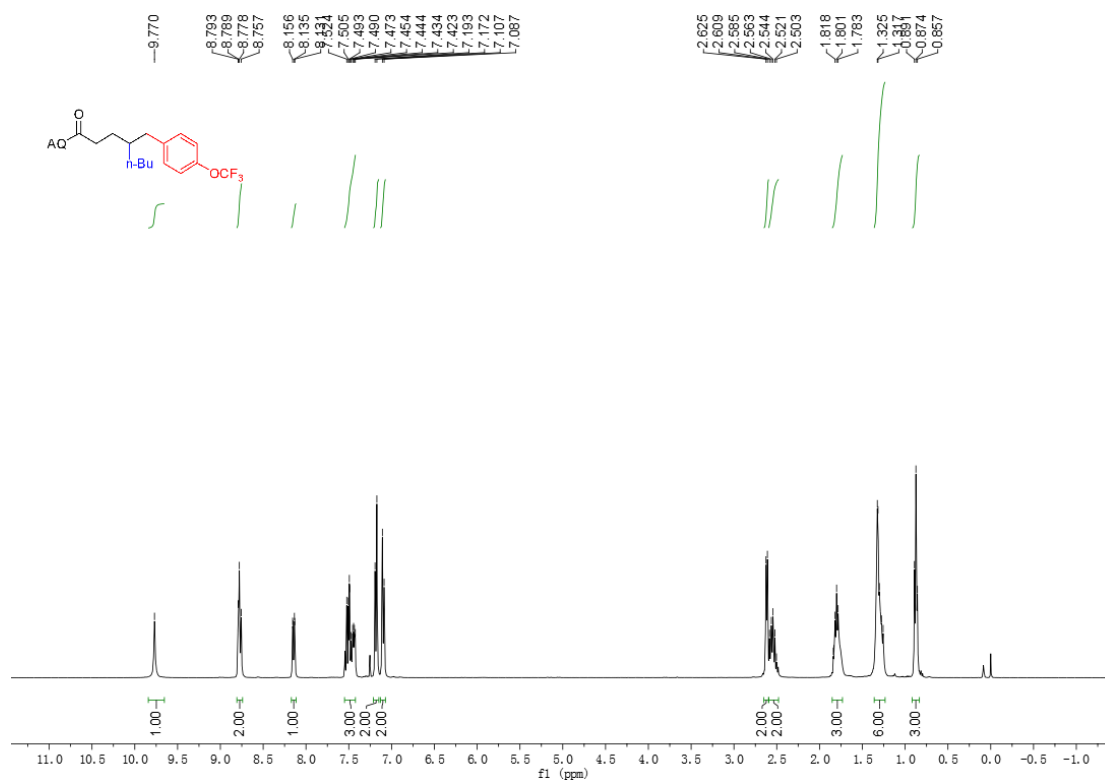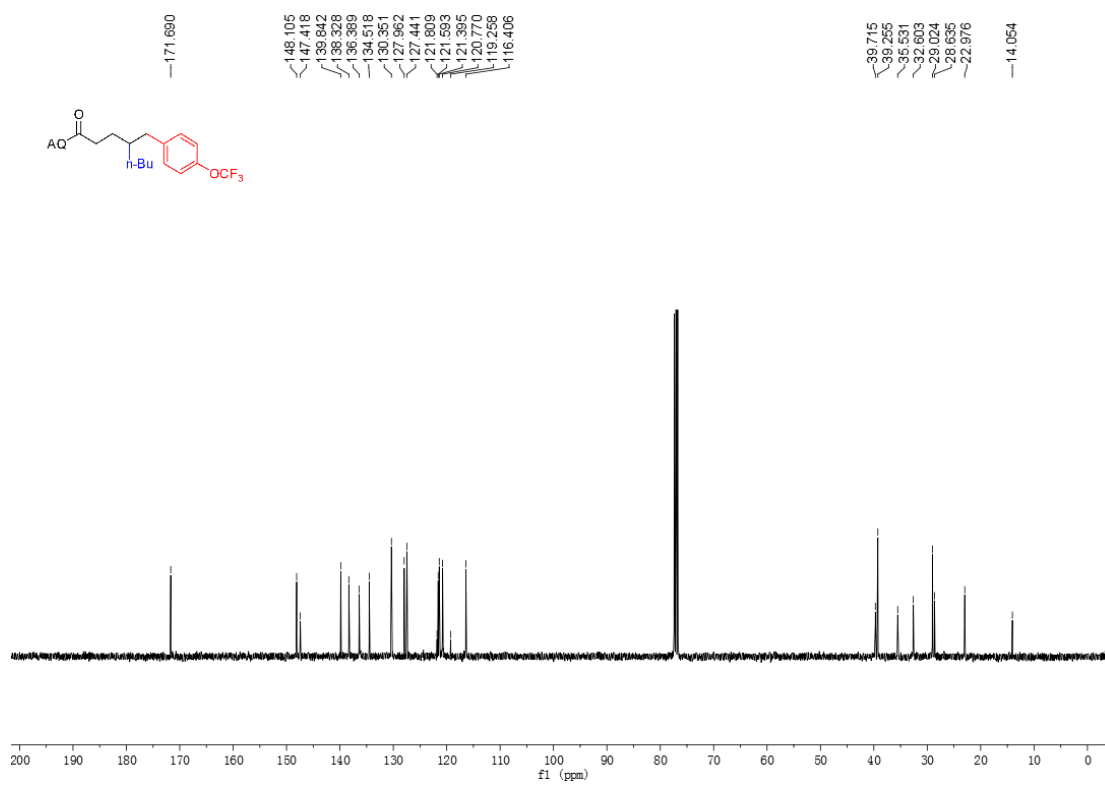

**Scheme 10.**  $^1\text{H}$  NMR (400 MHz,  $\text{CDCl}_3$ ) and  $^{13}\text{C}$  NMR (101 MHz,  $\text{CDCl}_3$ ) spectra of **2j**

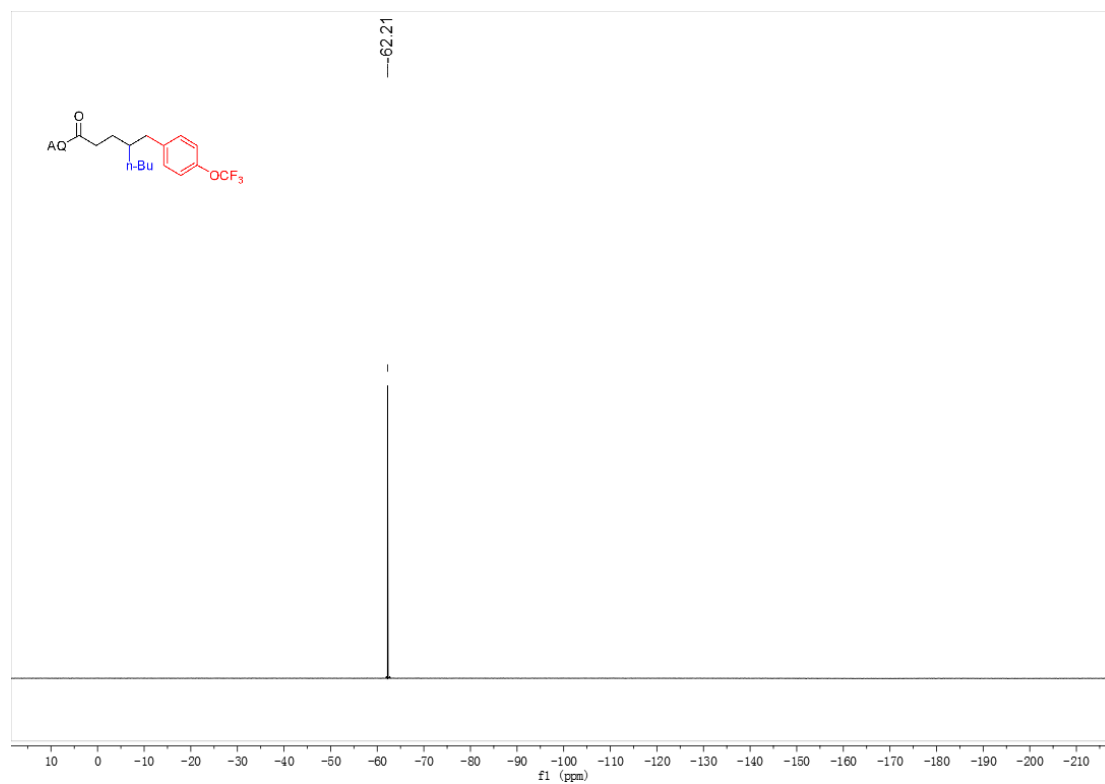

**Scheme 11.**  $^{19}\text{F}$  NMR (376 MHz,  $\text{CDCl}_3$ ) spectra of **2j**

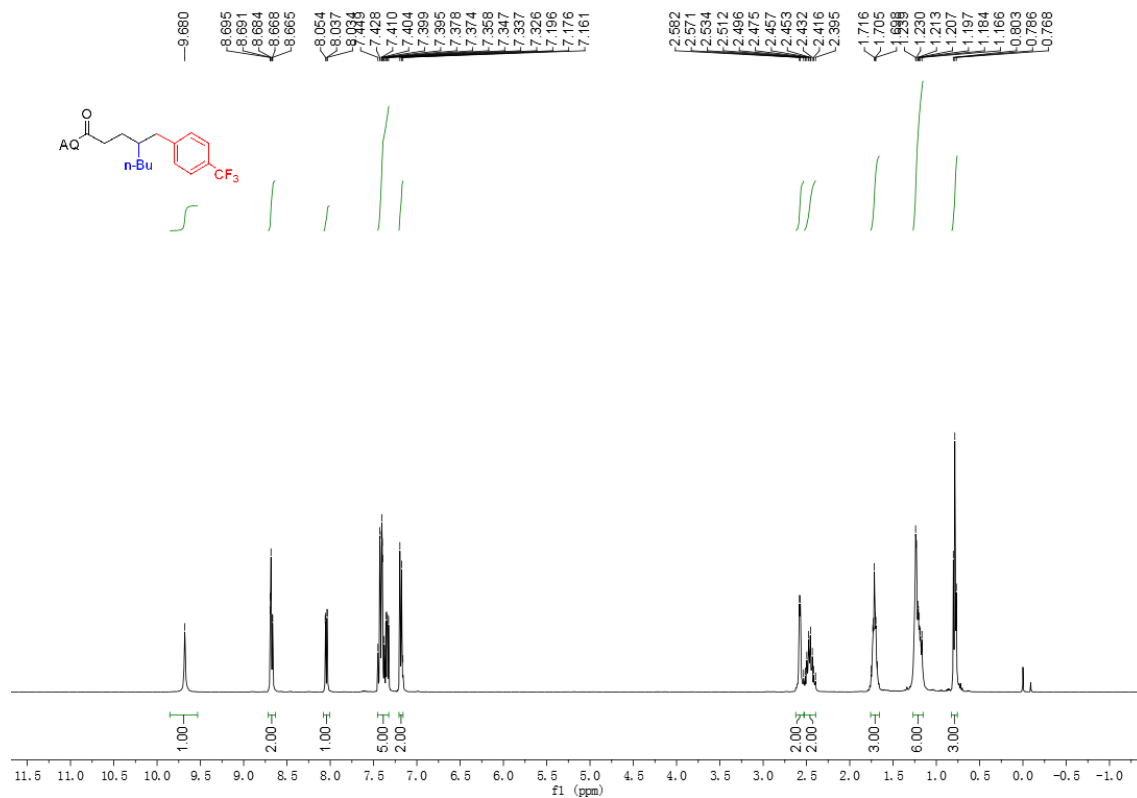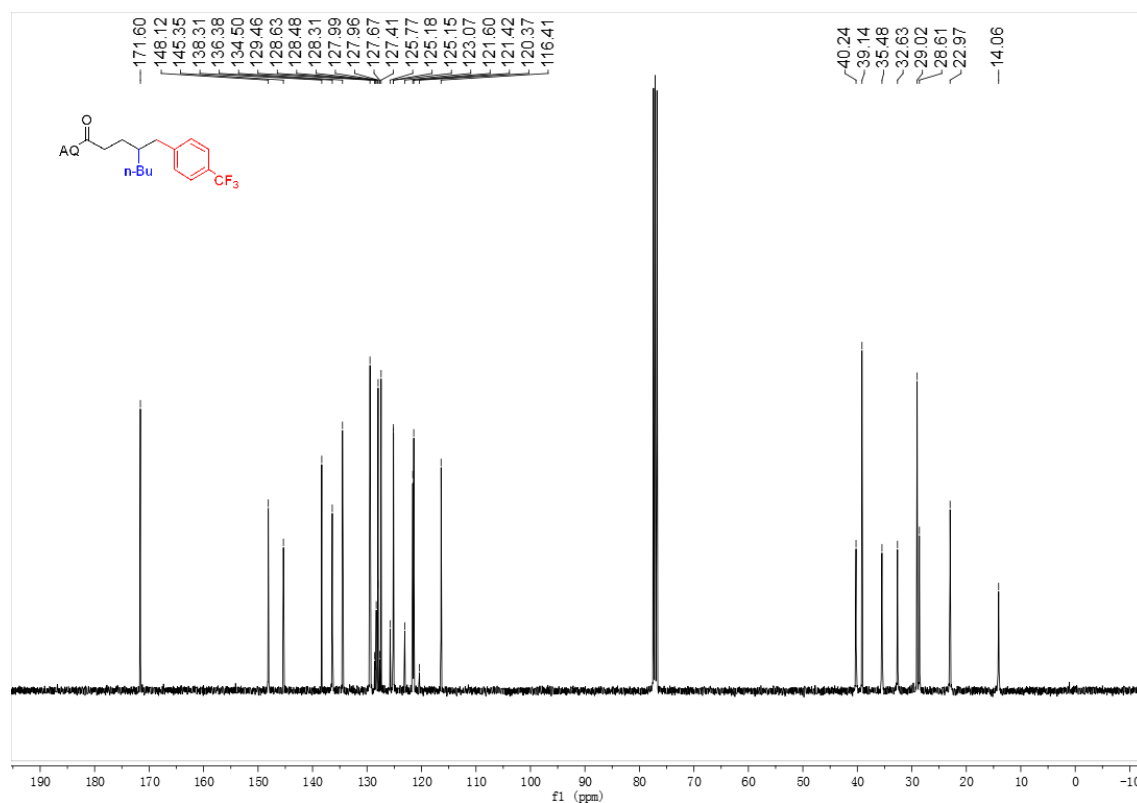

**Scheme 12.** <sup>1</sup>H NMR (400 MHz, CDCl<sub>3</sub>) and <sup>13</sup>C NMR (101 MHz, CDCl<sub>3</sub>) spectra of **2k**

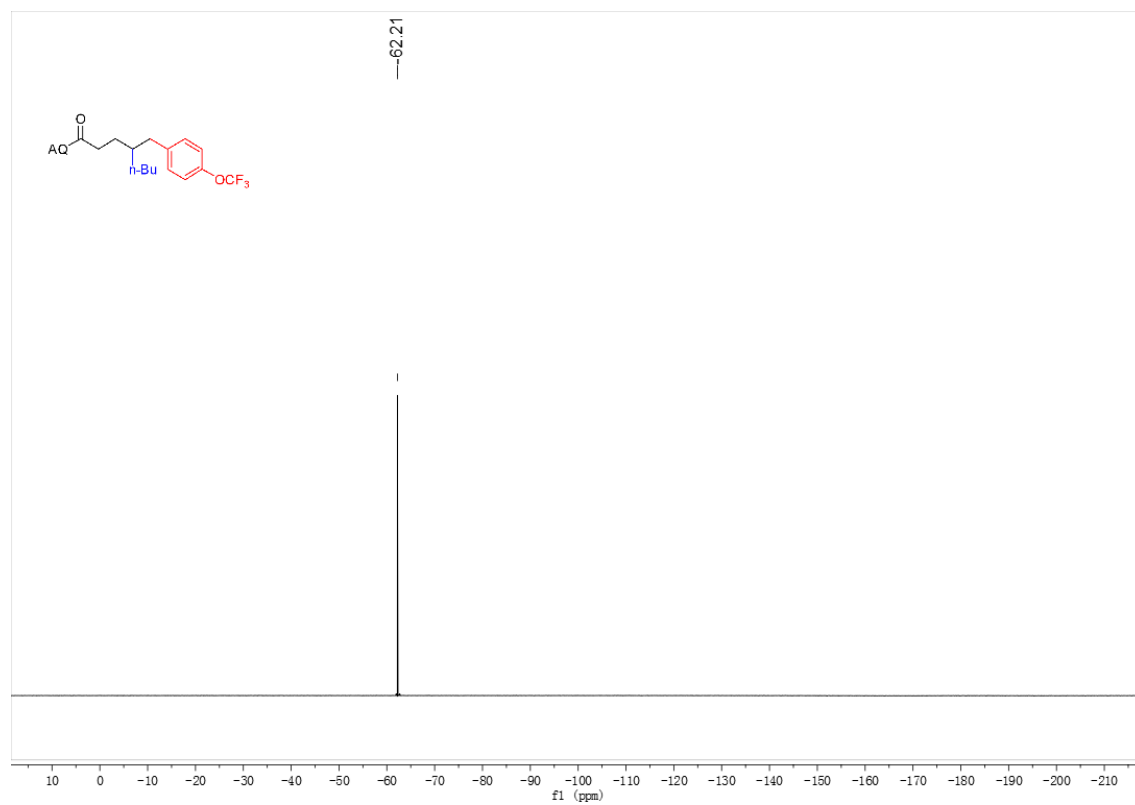

**Scheme 13.**  $^{19}\text{F}$  NMR (376 MHz,  $\text{CDCl}_3$ ) spectra of **2k**



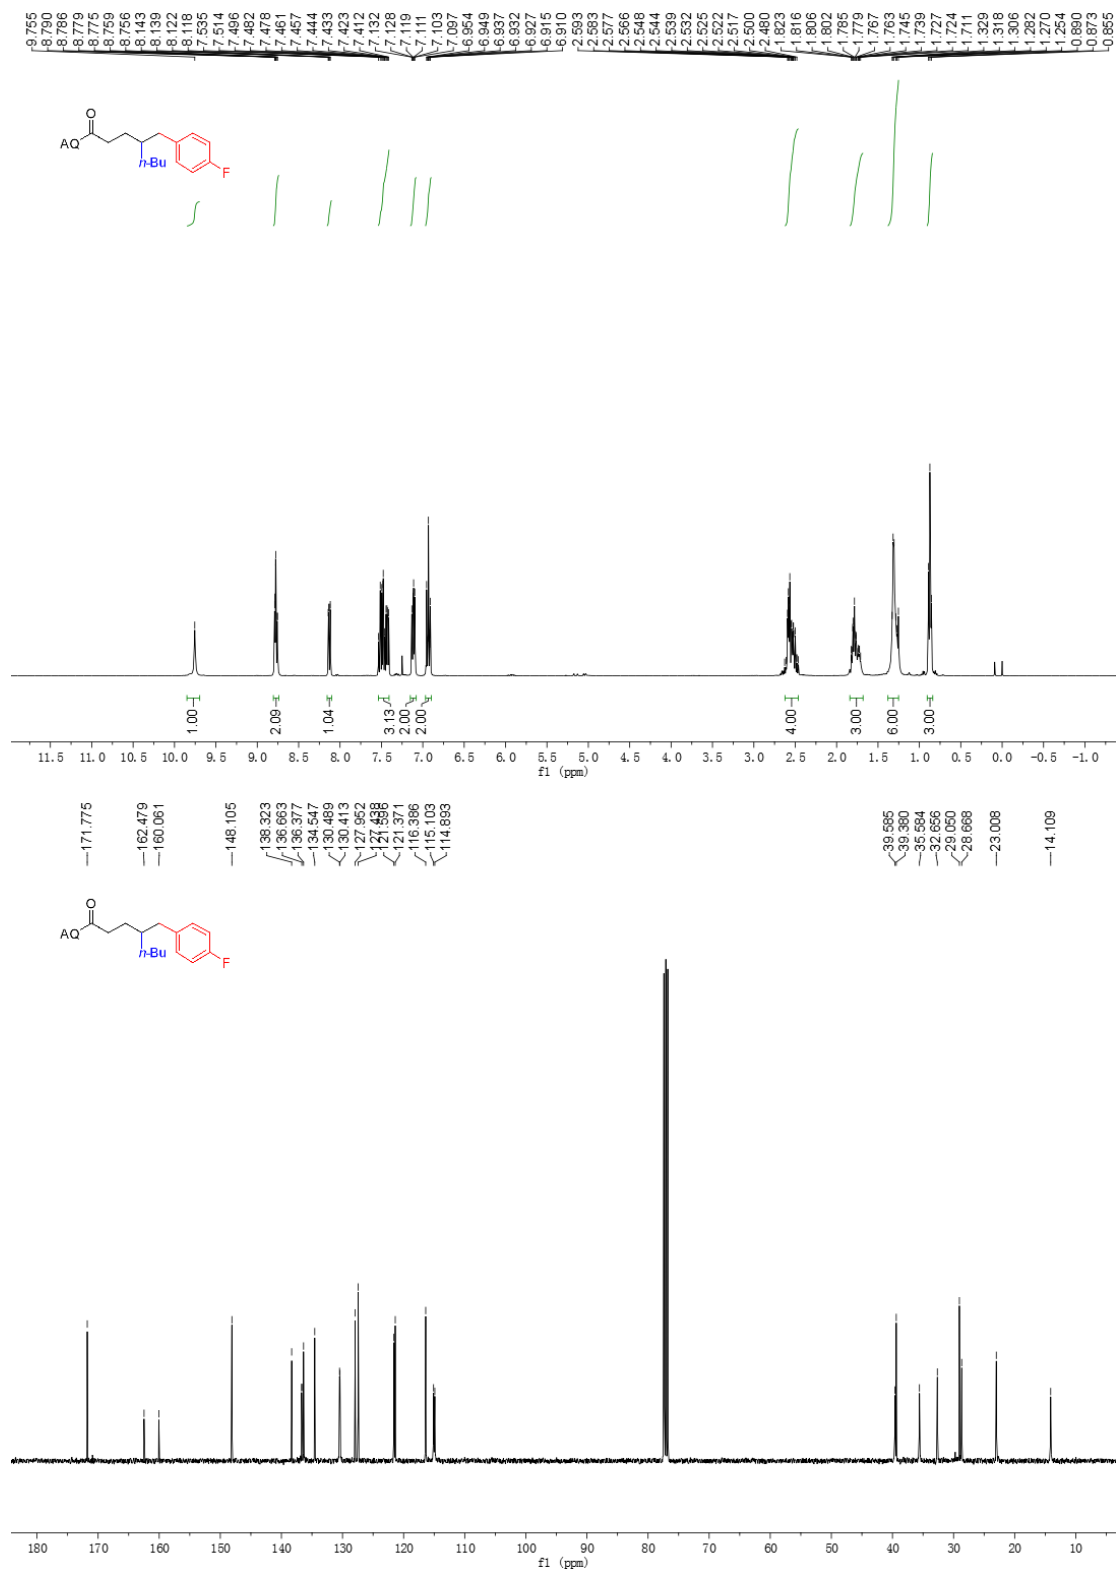

**Scheme 14.** <sup>1</sup>H NMR (400 MHz, CDCl<sub>3</sub>) and <sup>13</sup>C NMR (101 MHz, CDCl<sub>3</sub>) spectra of **21**

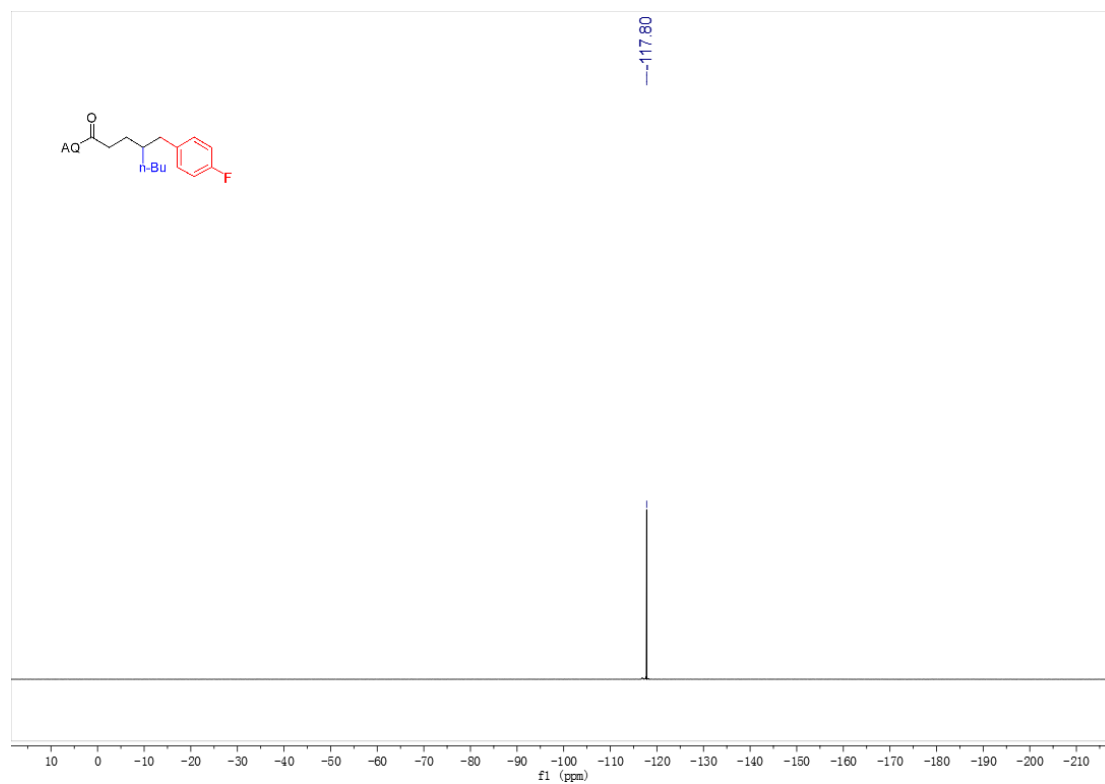

**Scheme 15.**  $^{19}\text{F}$  NMR (376 MHz,  $\text{CDCl}_3$ ) spectra of **21**

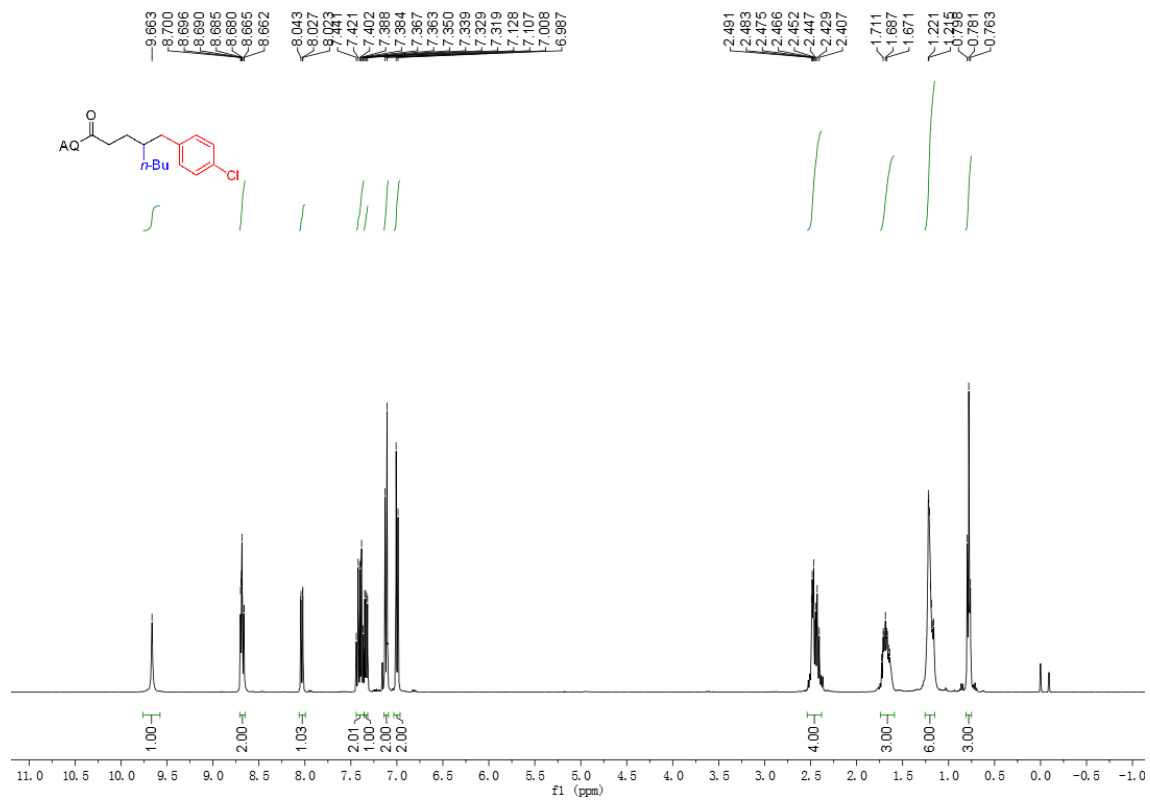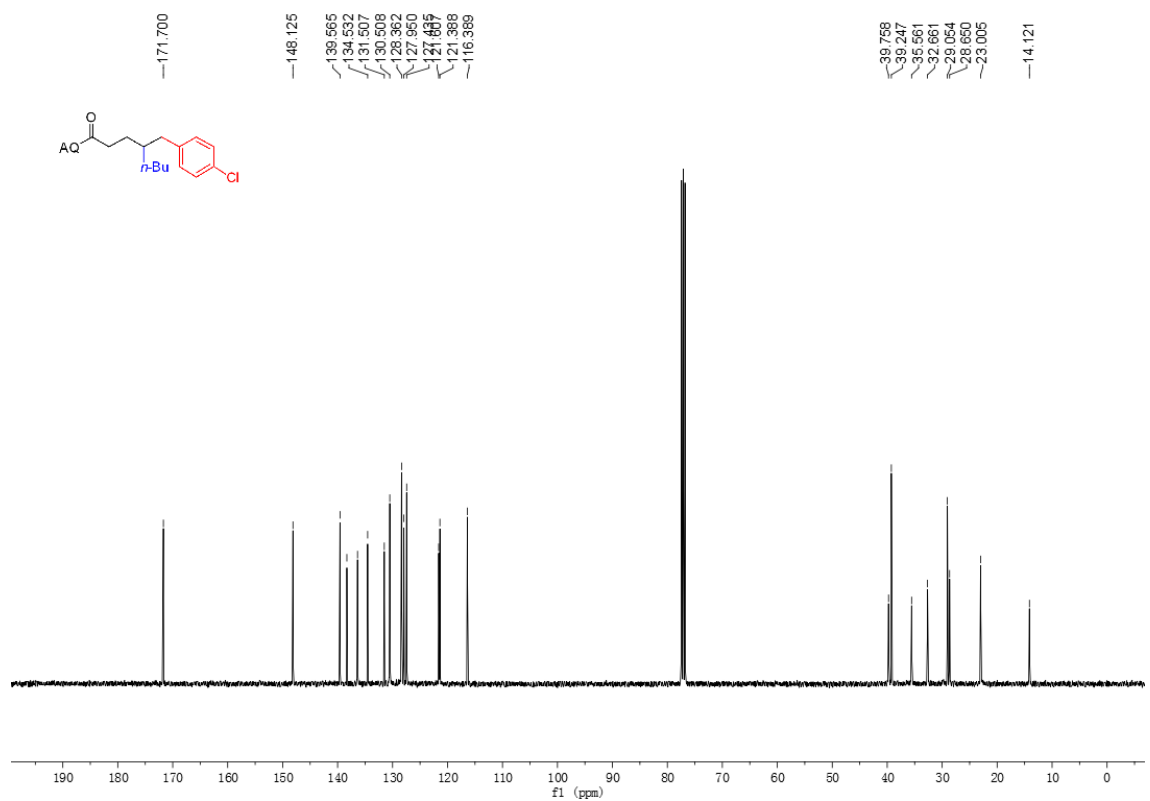

**Scheme 16.**  $^1\text{H}$  NMR (400 MHz,  $\text{CDCl}_3$ ) and  $^{13}\text{C}$  NMR (101 MHz,  $\text{CDCl}_3$ ) spectra of **2m**

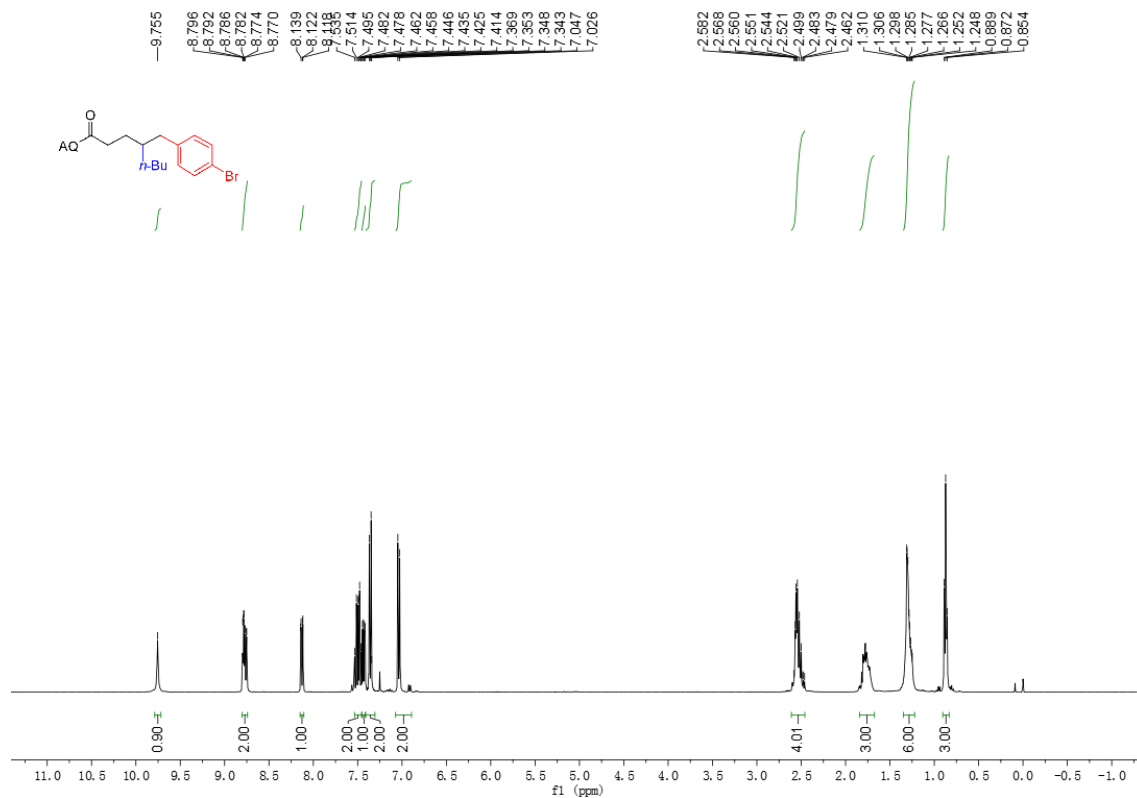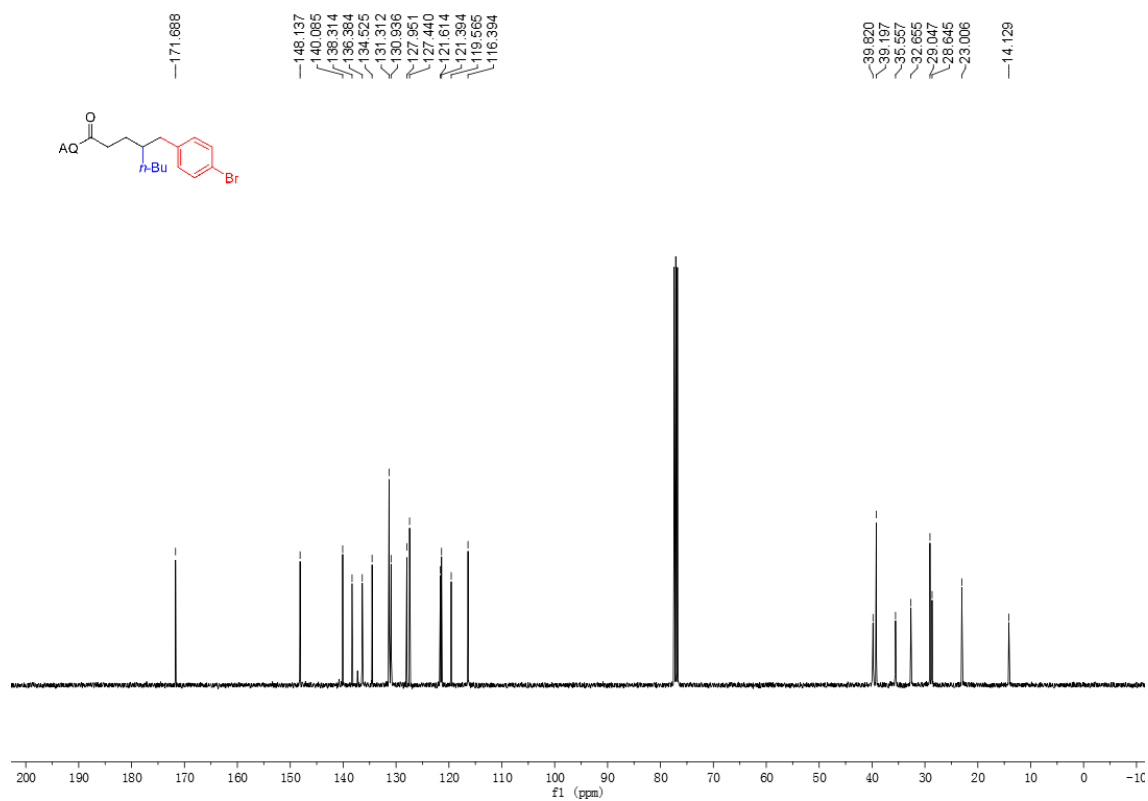

**Scheme 17.**  $^1\text{H}$  NMR (400 MHz,  $\text{CDCl}_3$ ) and  $^{13}\text{C}$  NMR (101 MHz,  $\text{CDCl}_3$ ) spectra of **2n**

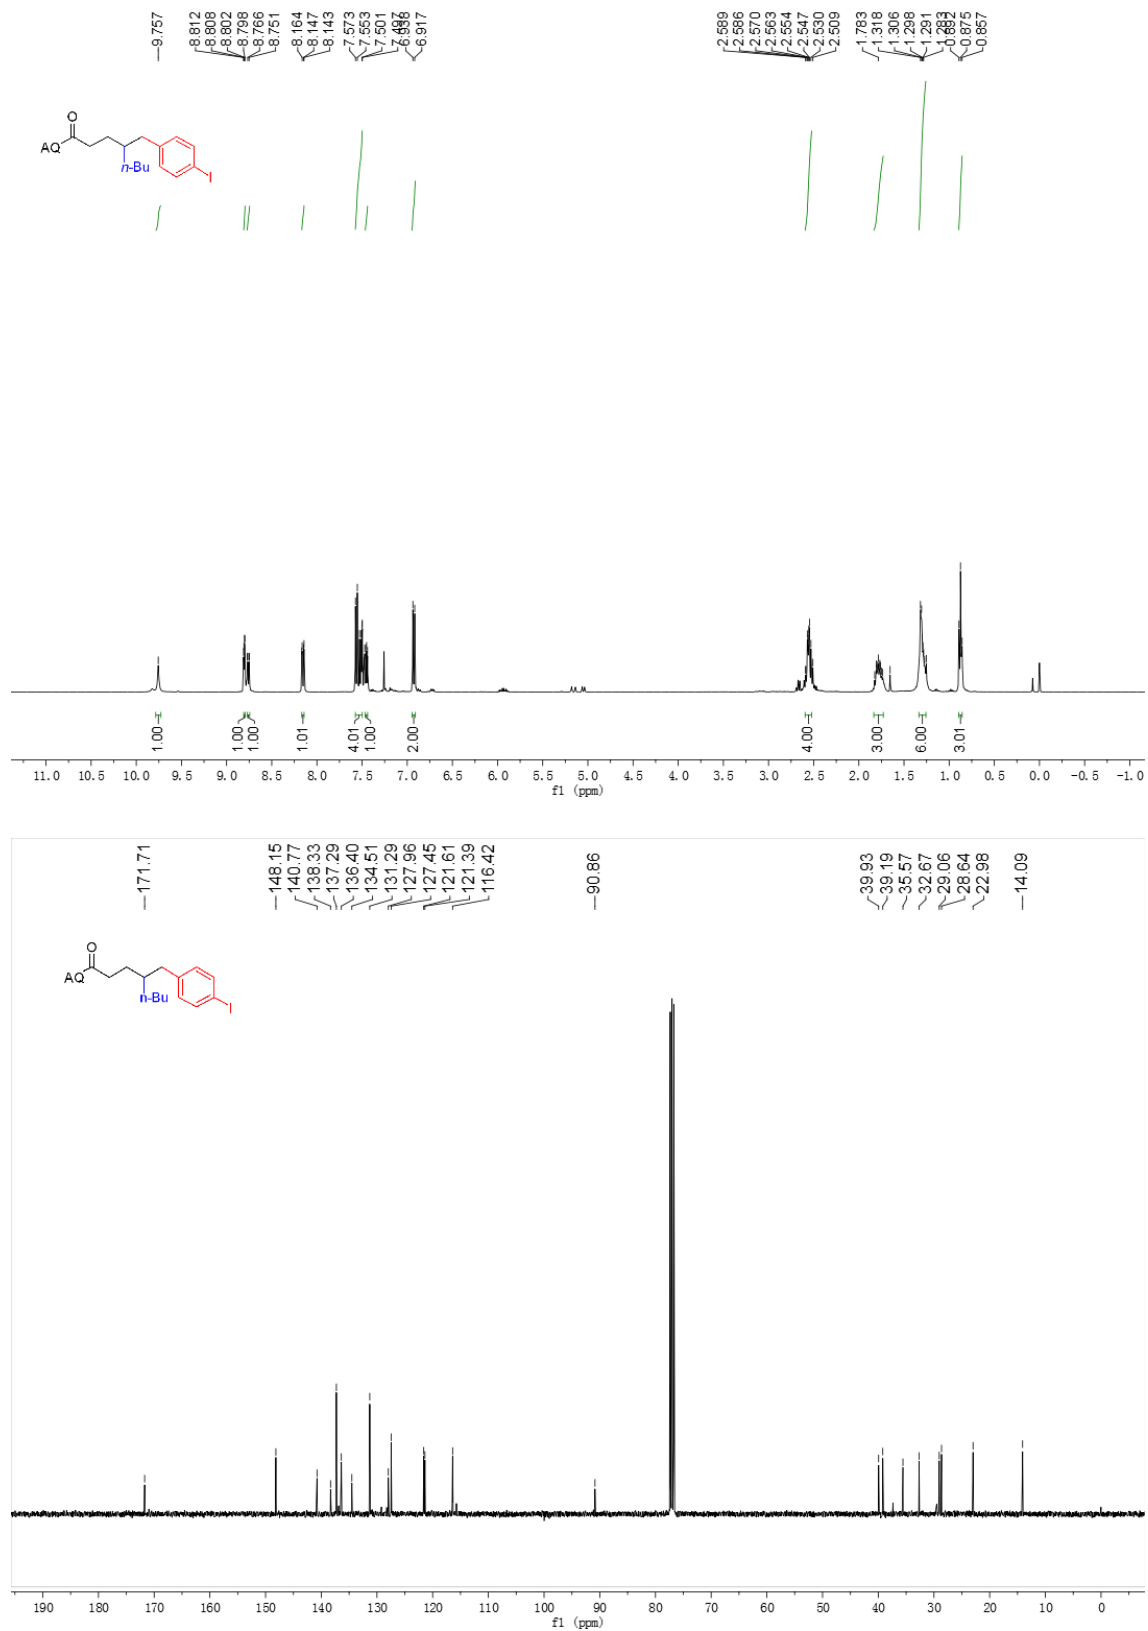

**Scheme 18.** <sup>1</sup>H NMR (400 MHz, CDCl<sub>3</sub>) and <sup>13</sup>C NMR (101 MHz, CDCl<sub>3</sub>) spectra of **20**

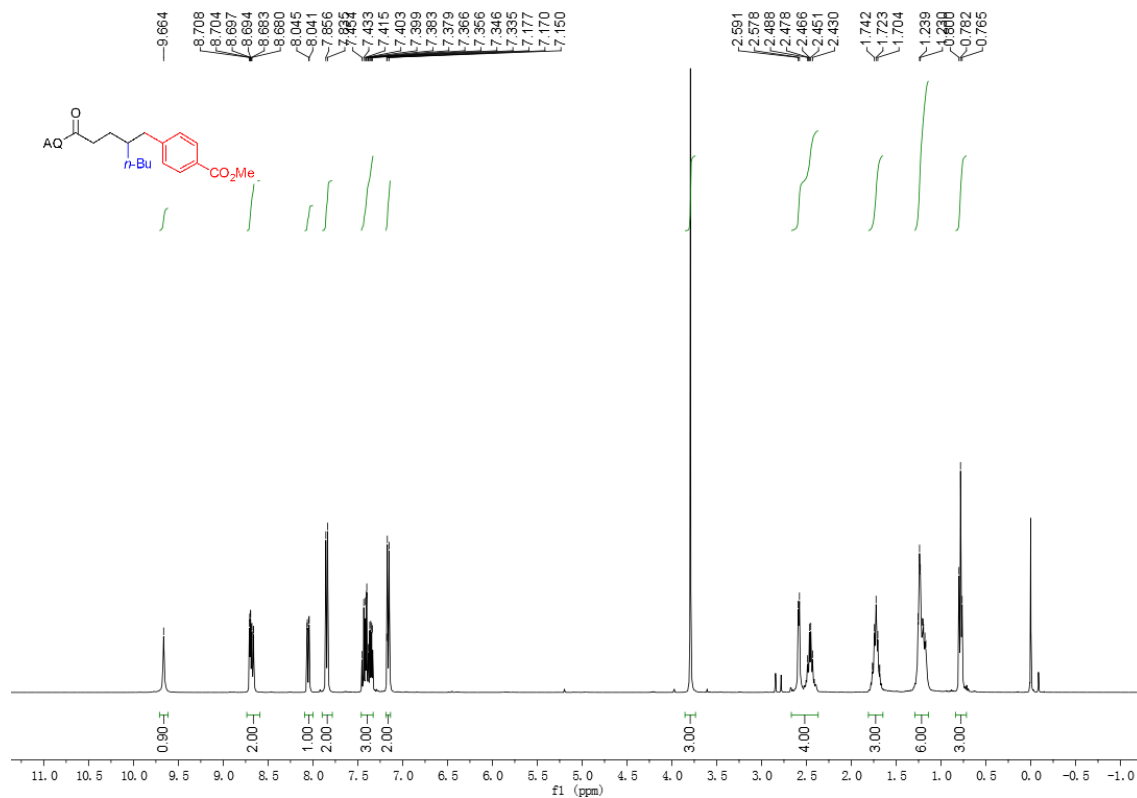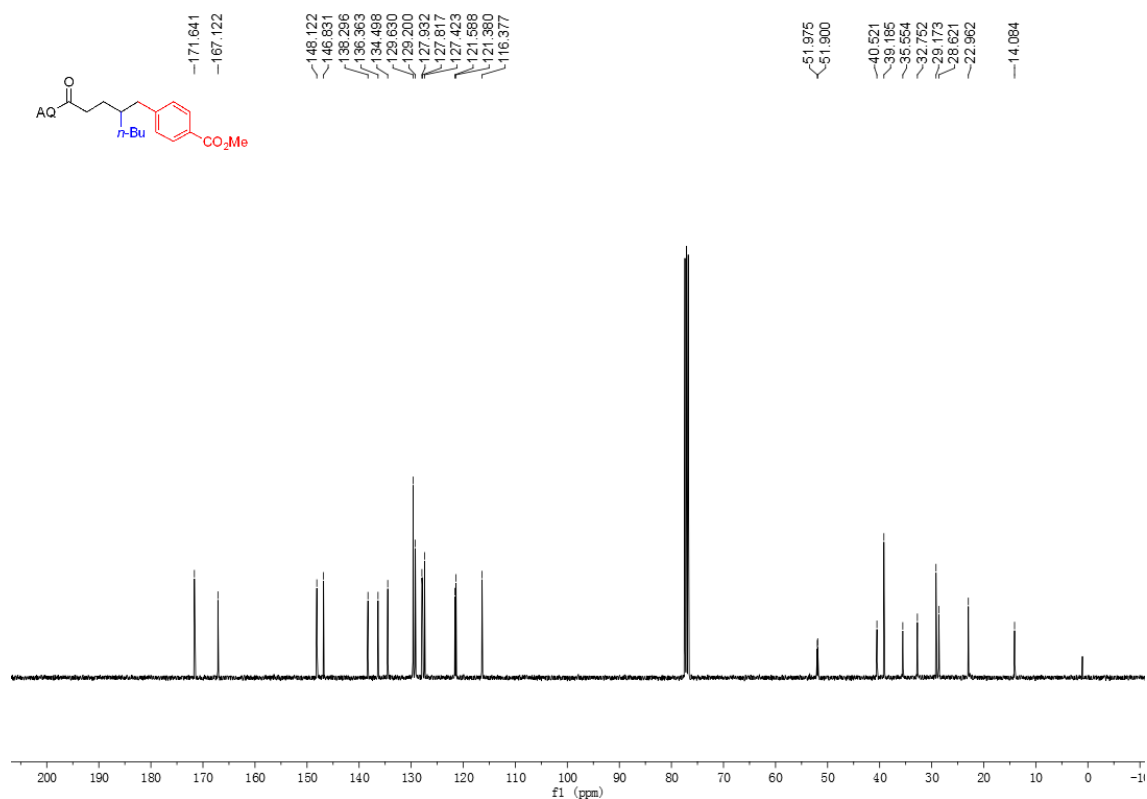

**Scheme 19.** <sup>1</sup>H NMR (400 MHz, CDCl<sub>3</sub>) and <sup>13</sup>C NMR (101 MHz, CDCl<sub>3</sub>) spectra of **2p**

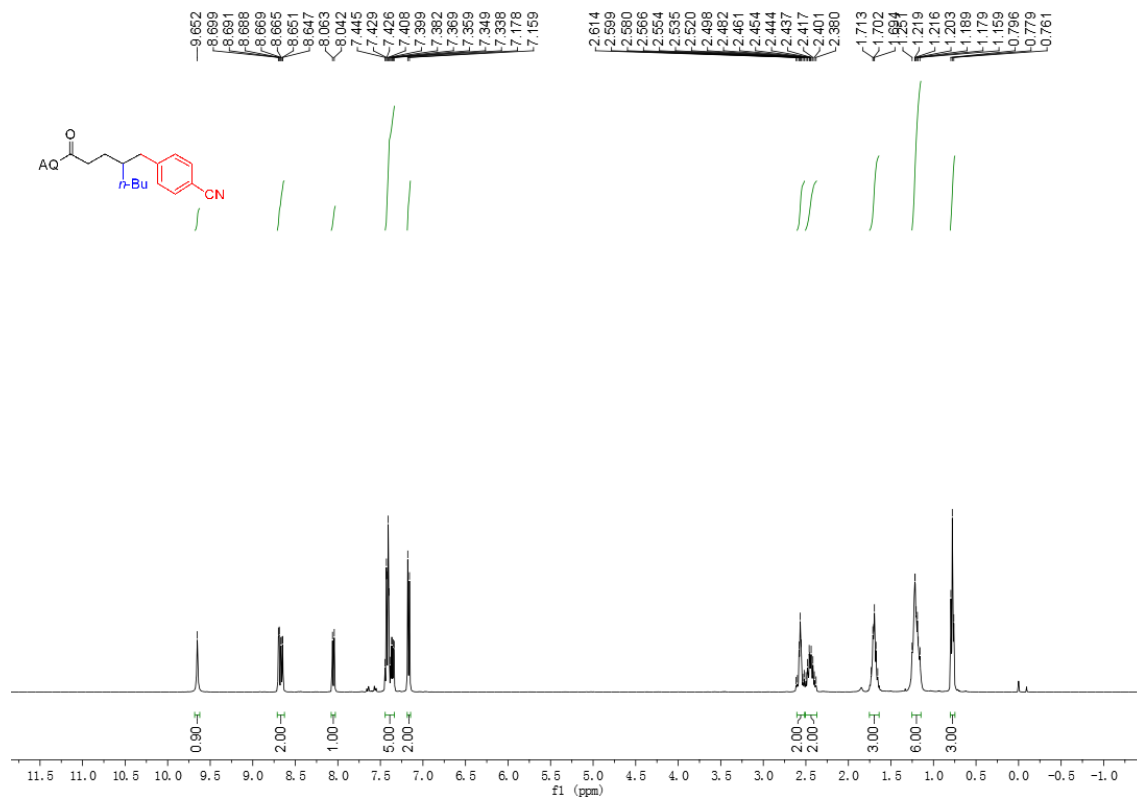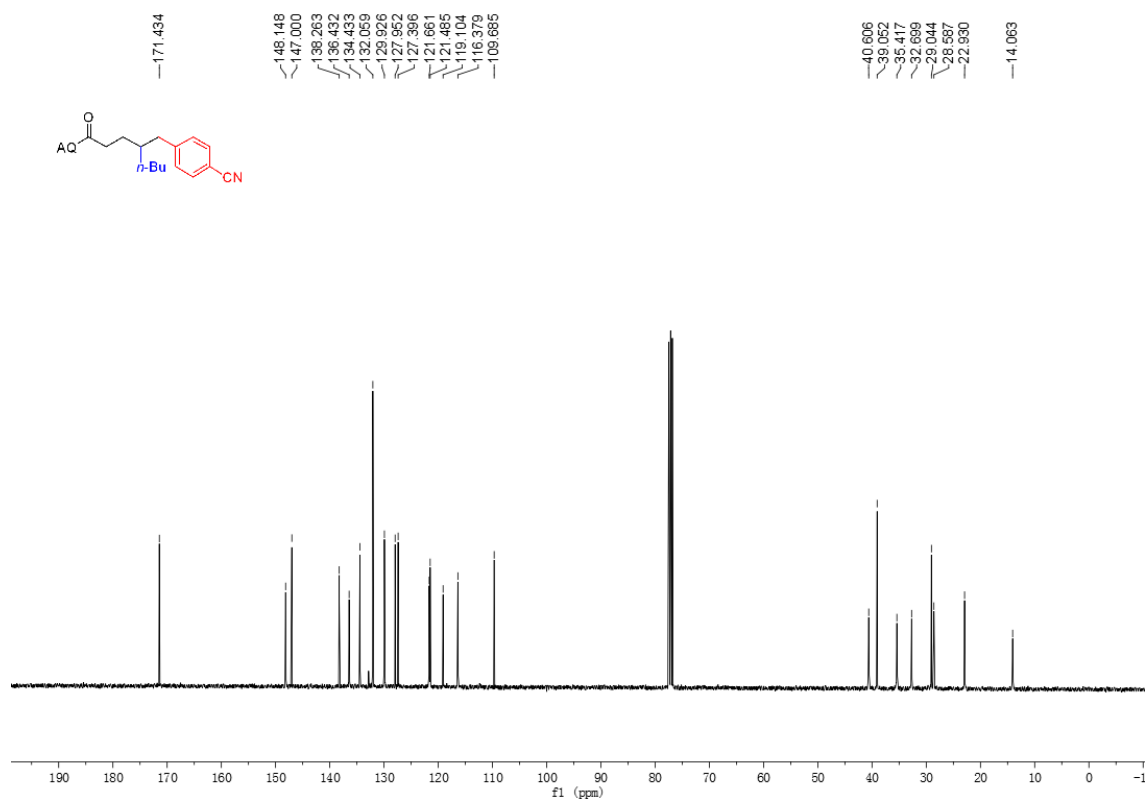

**Scheme 20.**  $^1\text{H}$  NMR (400 MHz,  $\text{CDCl}_3$ ) and  $^{13}\text{C}$  NMR (101 MHz,  $\text{CDCl}_3$ ) spectra of **2q**

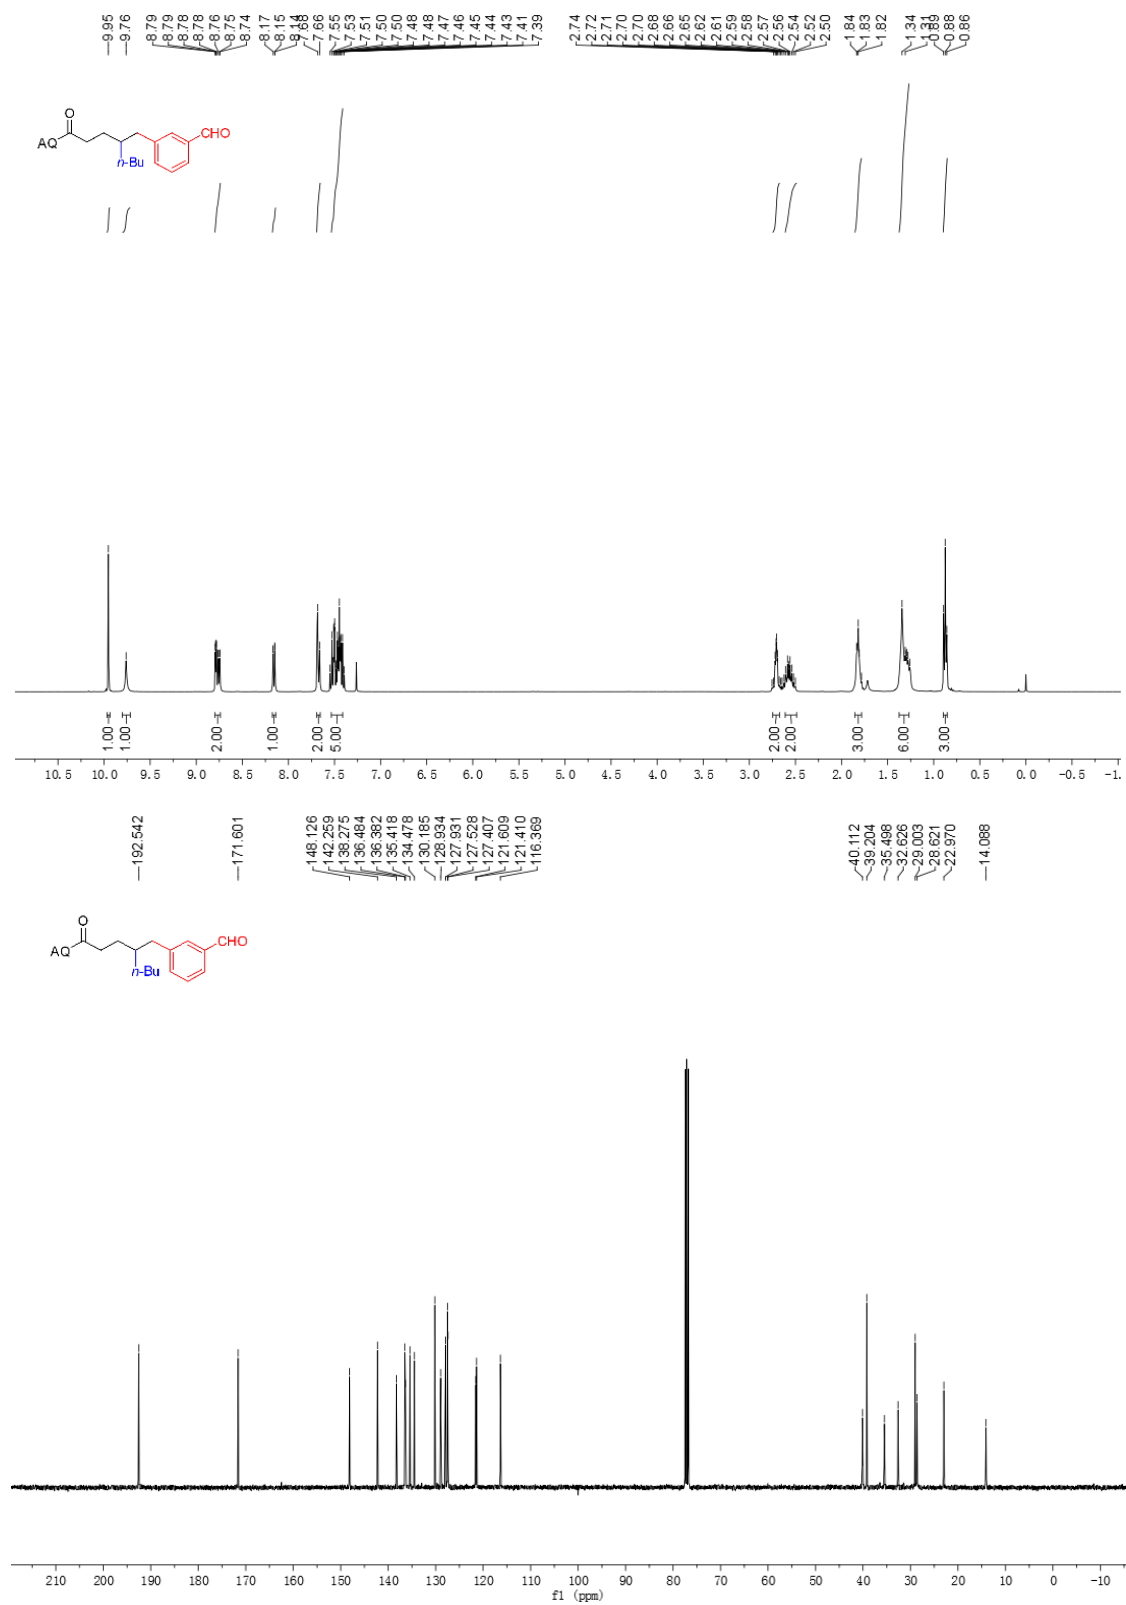

**Scheme 21.** <sup>1</sup>H NMR (400 MHz, CDCl<sub>3</sub>) and <sup>13</sup>C NMR (101 MHz, CDCl<sub>3</sub>) spectra of **2r**



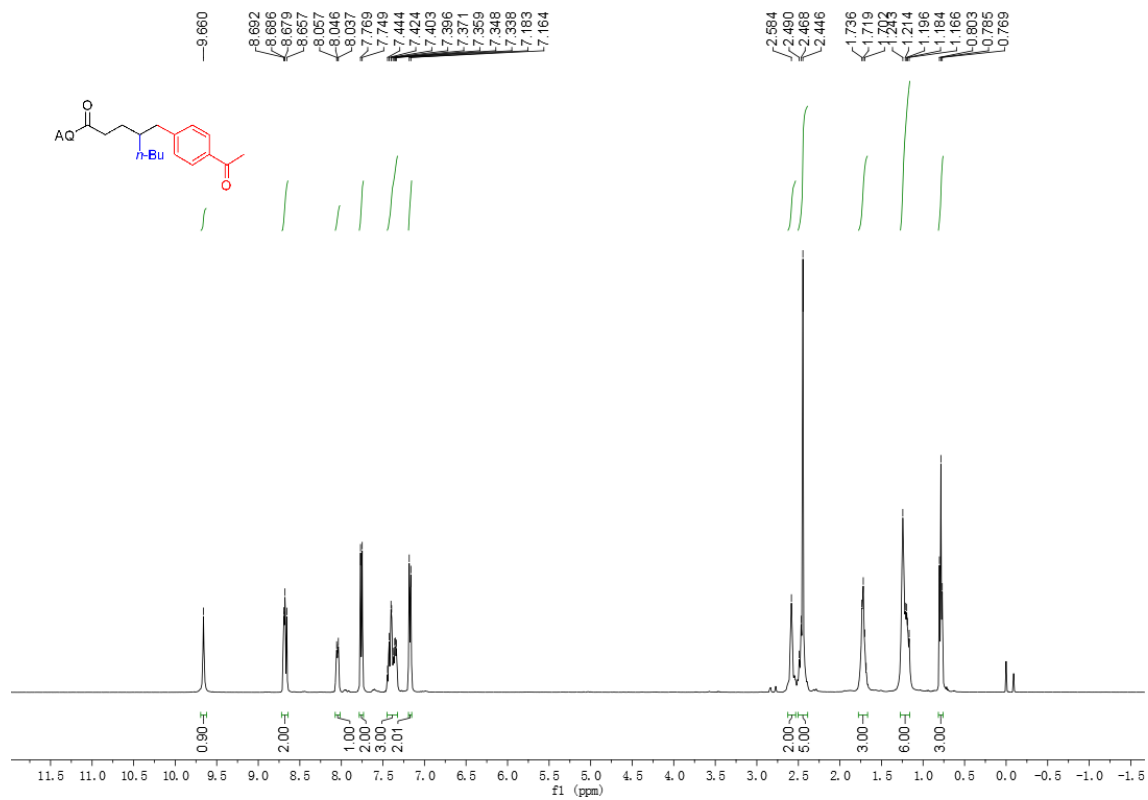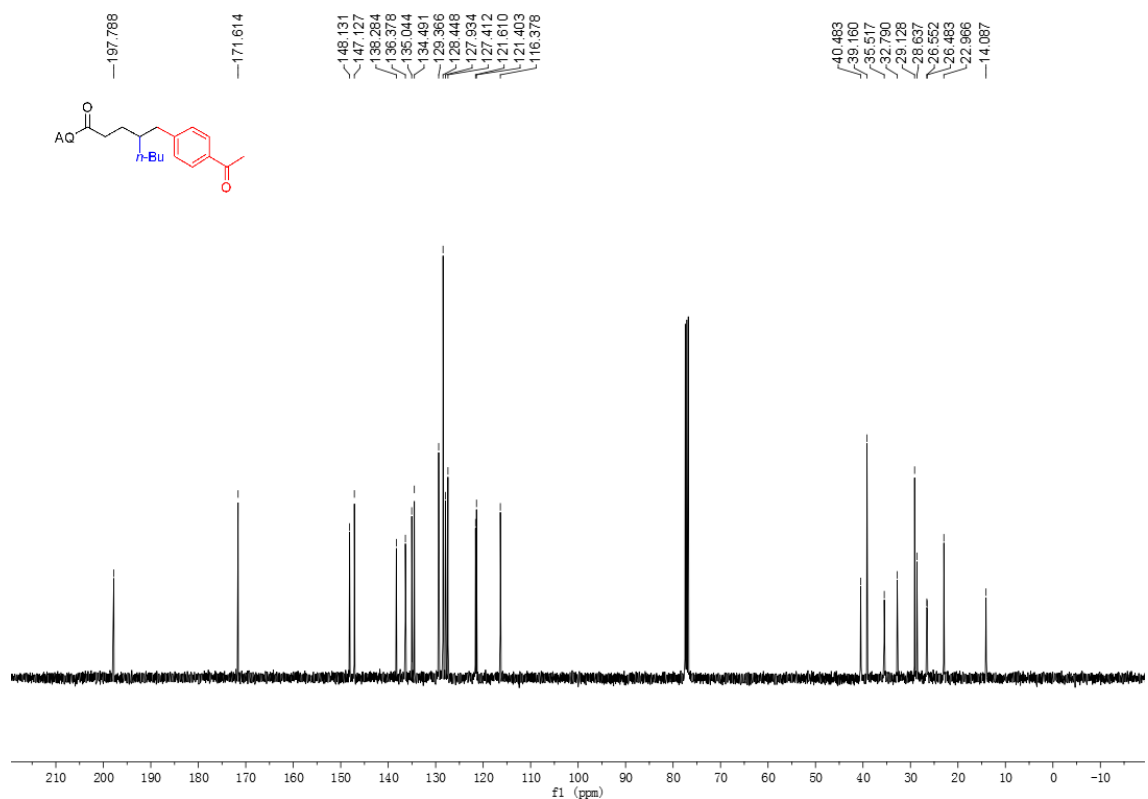

**Scheme 22.** <sup>1</sup>H NMR (400 MHz, CDCl<sub>3</sub>) and <sup>13</sup>C NMR (101 MHz, CDCl<sub>3</sub>) spectra of **2s**

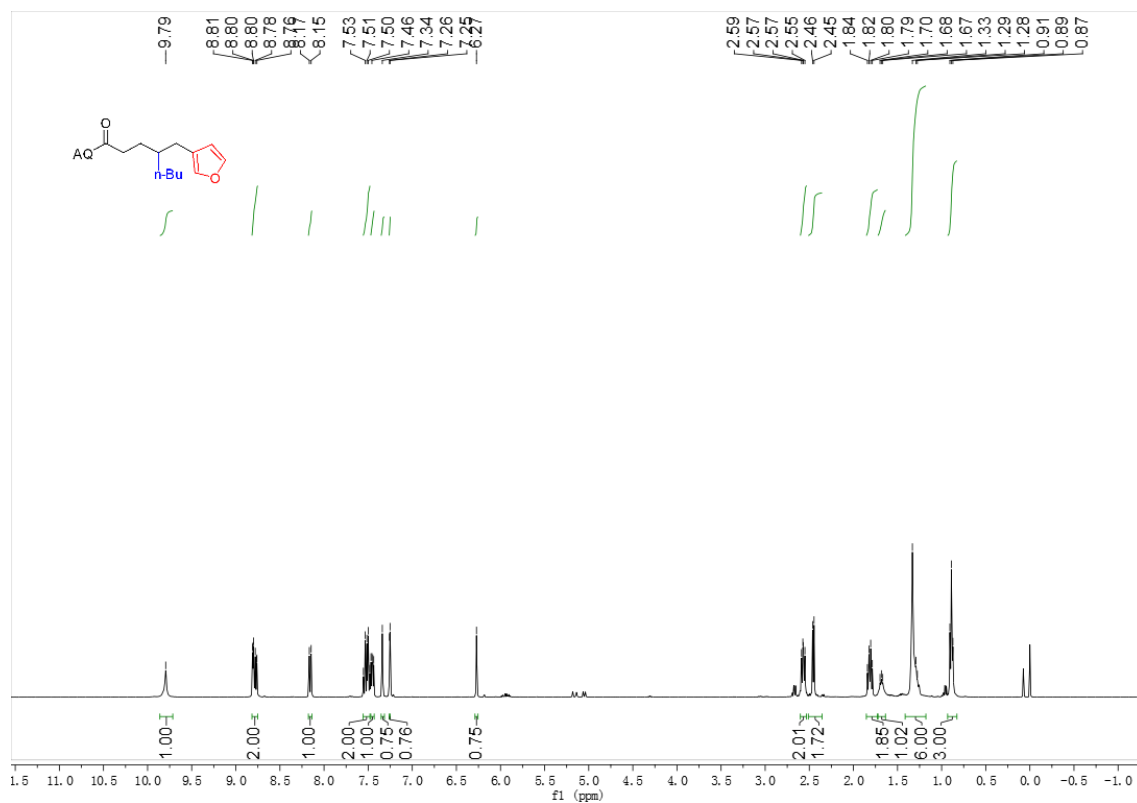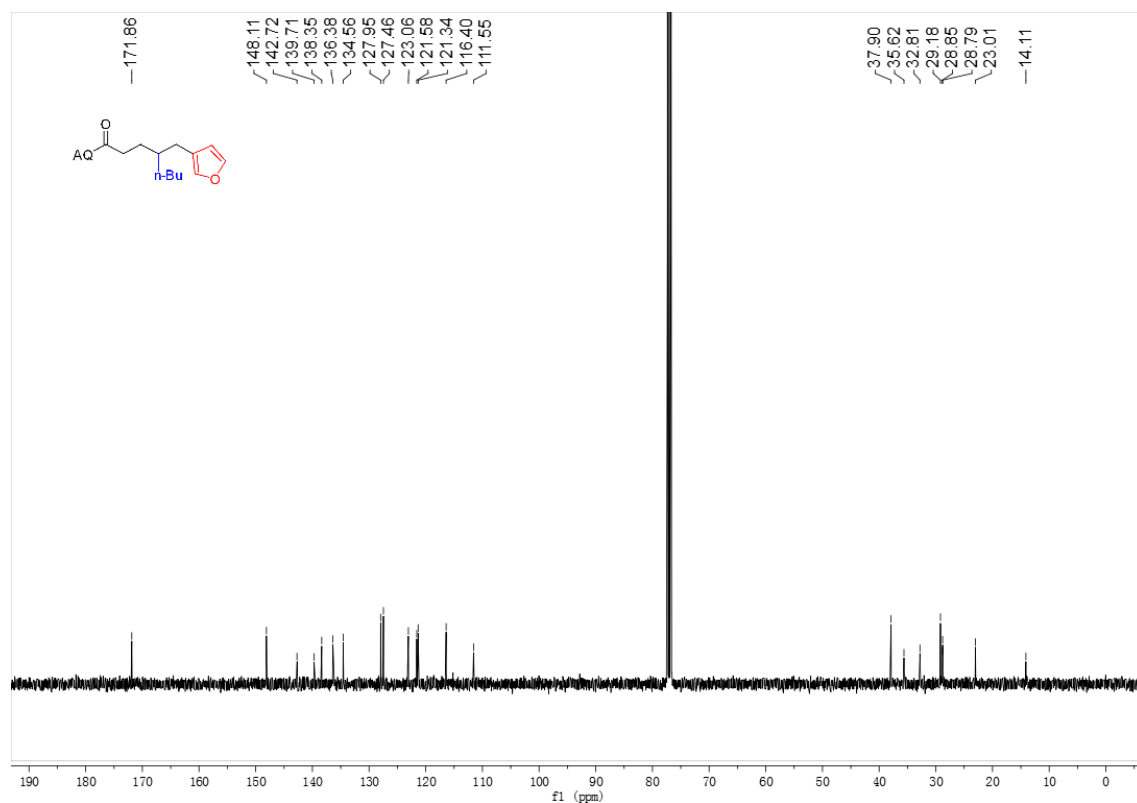

**Scheme 23.** <sup>1</sup>H NMR (400 MHz, CDCl<sub>3</sub>) and <sup>13</sup>C NMR (101 MHz, CDCl<sub>3</sub>) spectra of **2t**

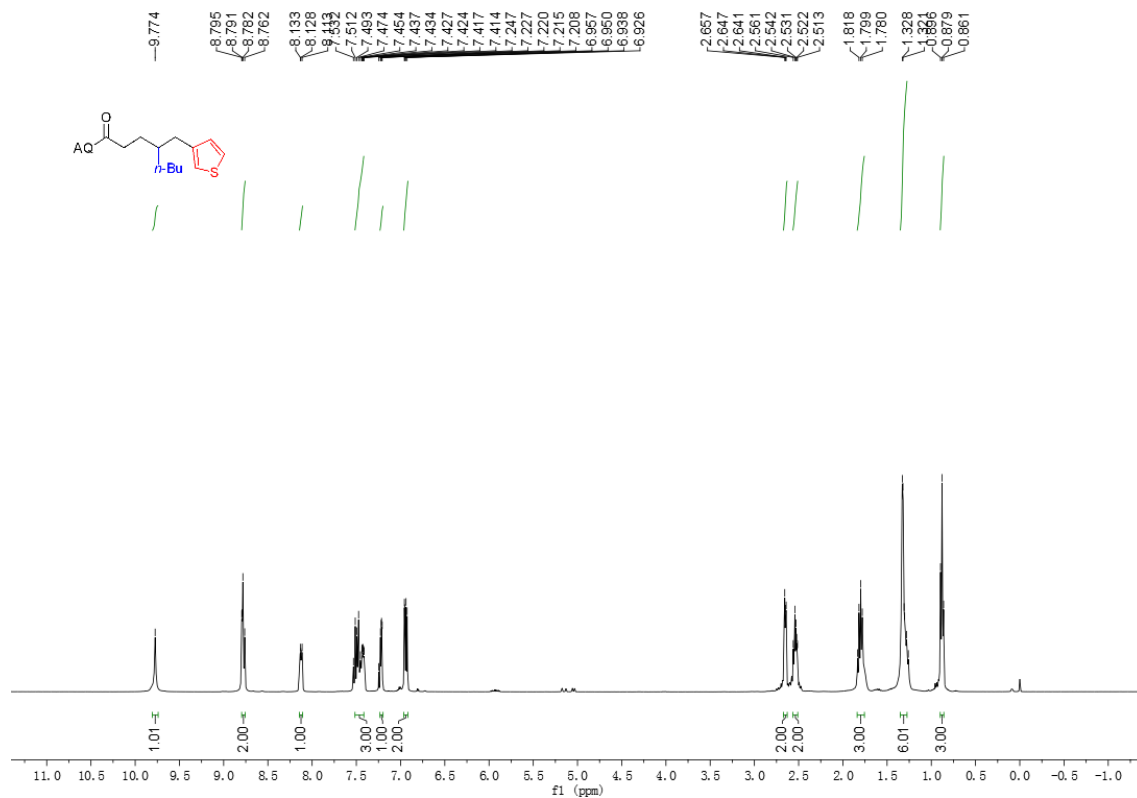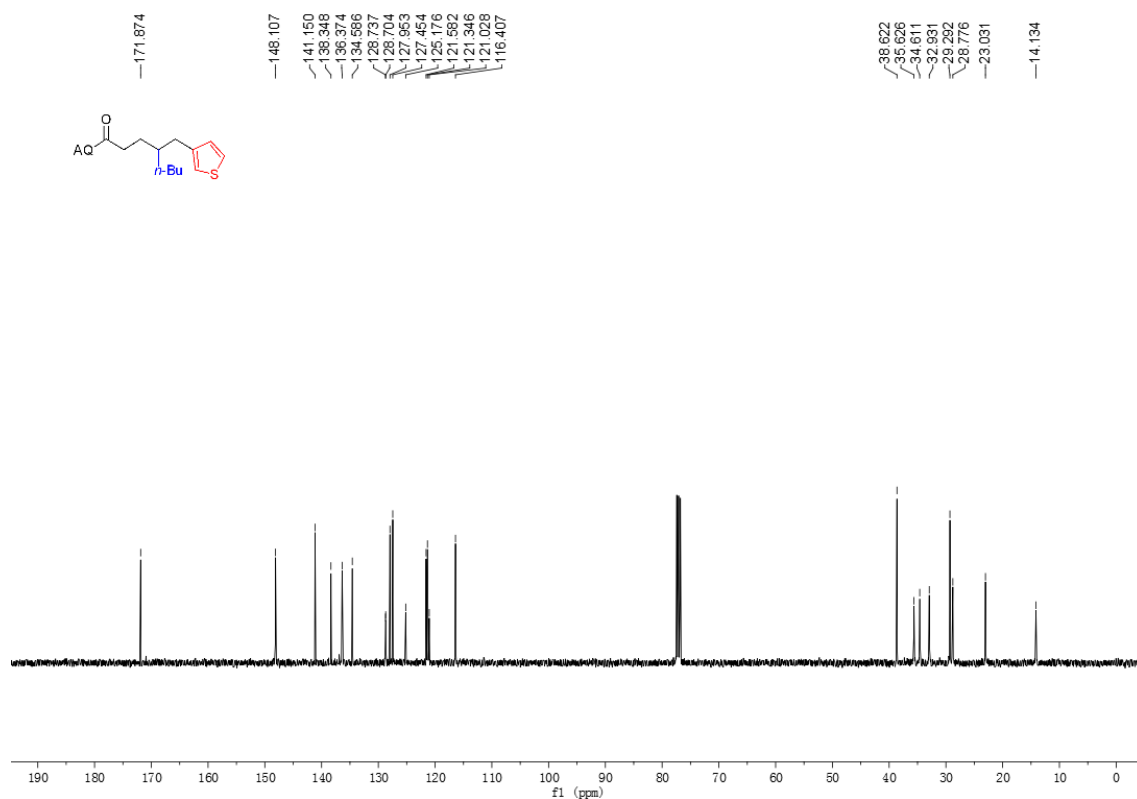

**Scheme 24.** <sup>1</sup>H NMR (400 MHz, CDCl<sub>3</sub>) and <sup>13</sup>C NMR (101 MHz, CDCl<sub>3</sub>) spectra of **2u**

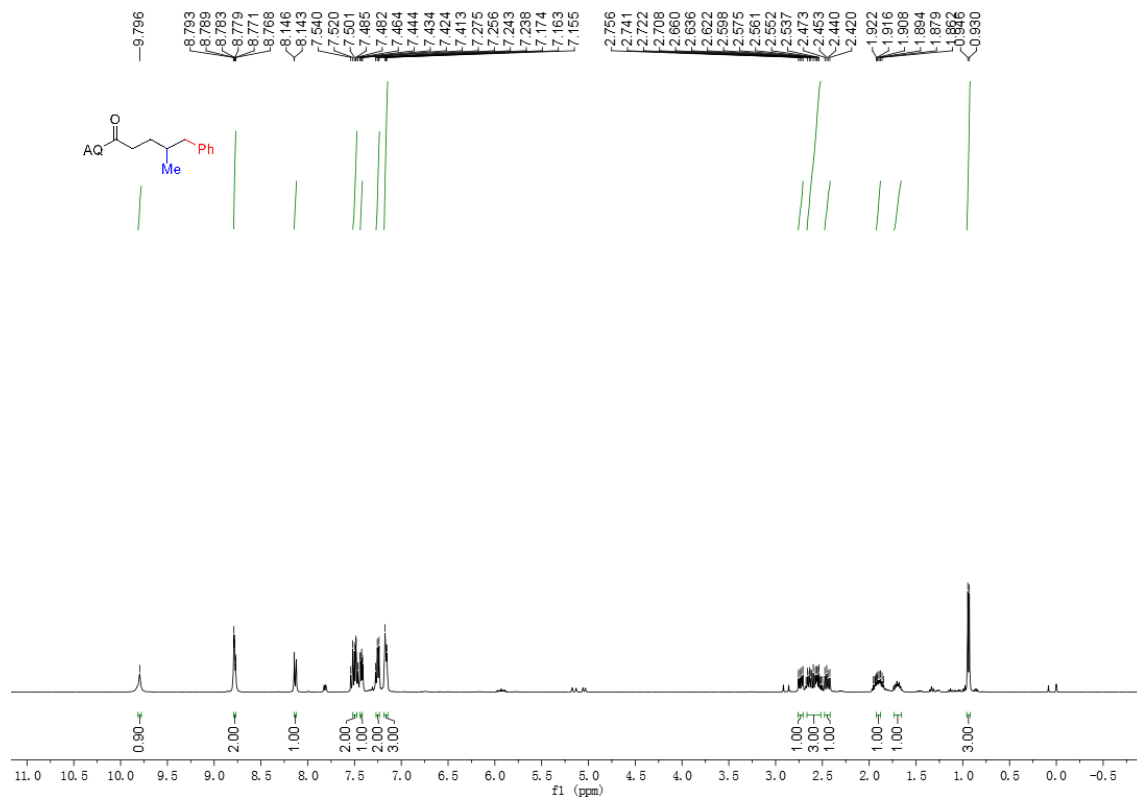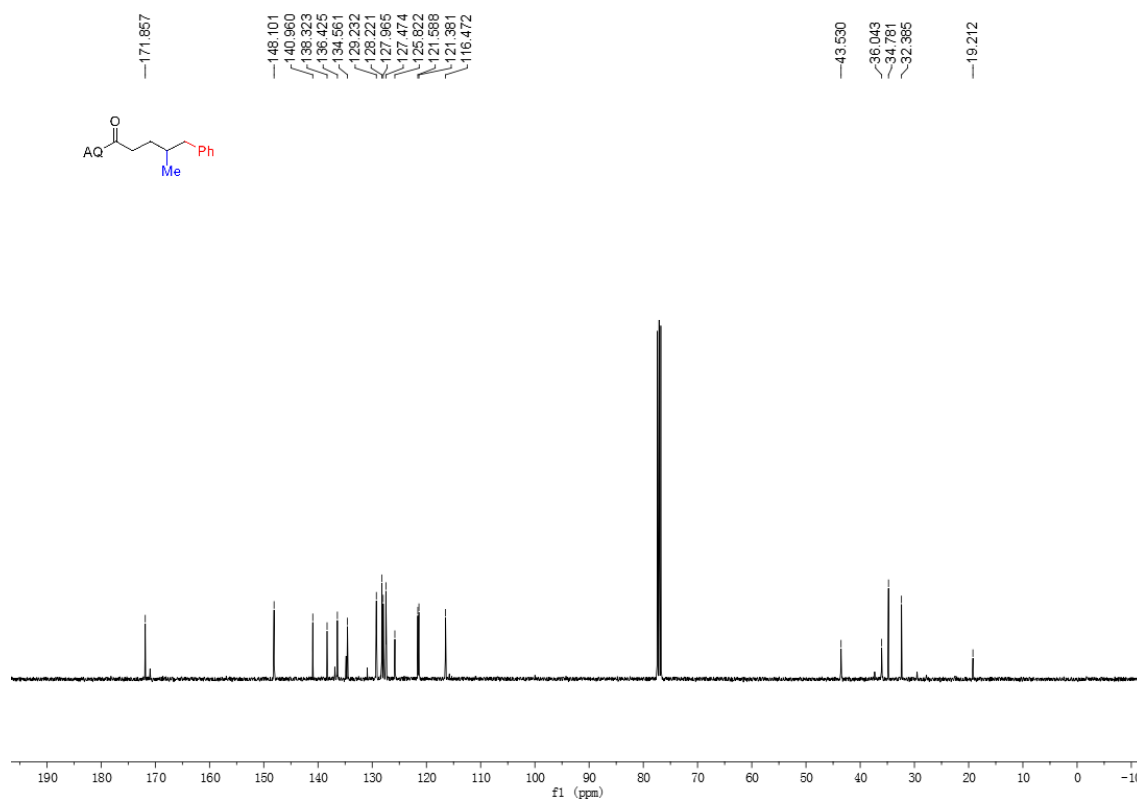

**Scheme 25.**  $^1\text{H}$  NMR (400 MHz,  $\text{CDCl}_3$ ) and  $^{13}\text{C}$  NMR (101 MHz,  $\text{CDCl}_3$ ) spectra of **2v**

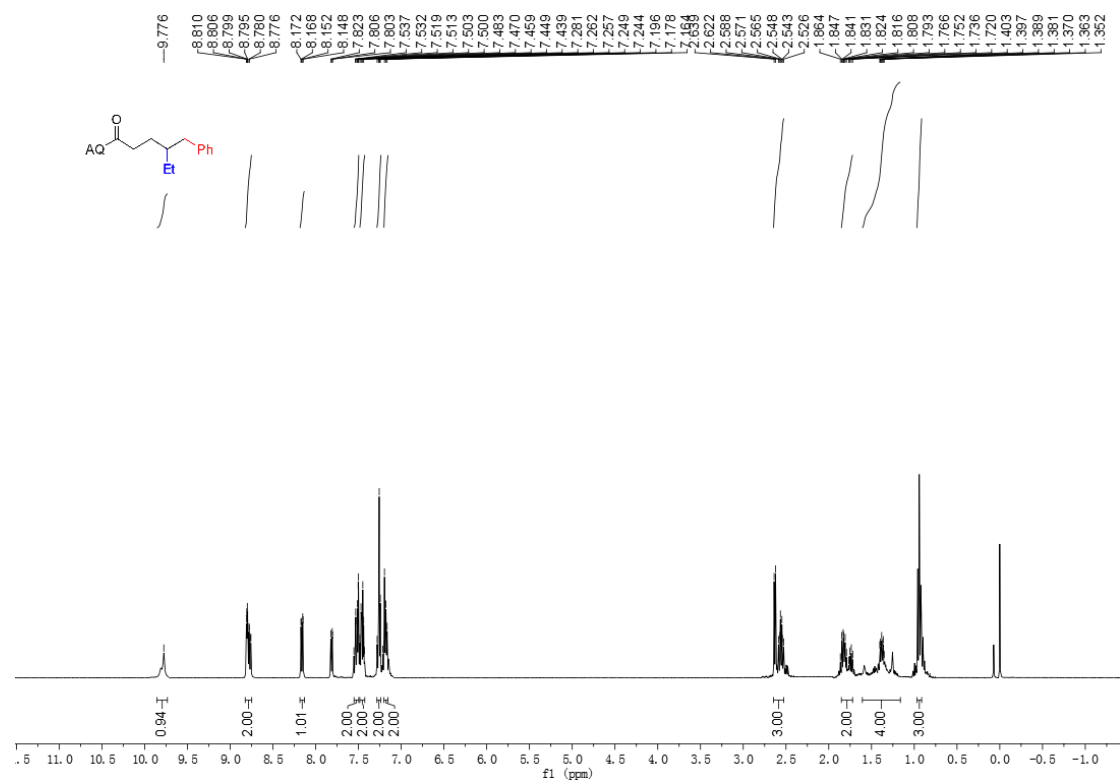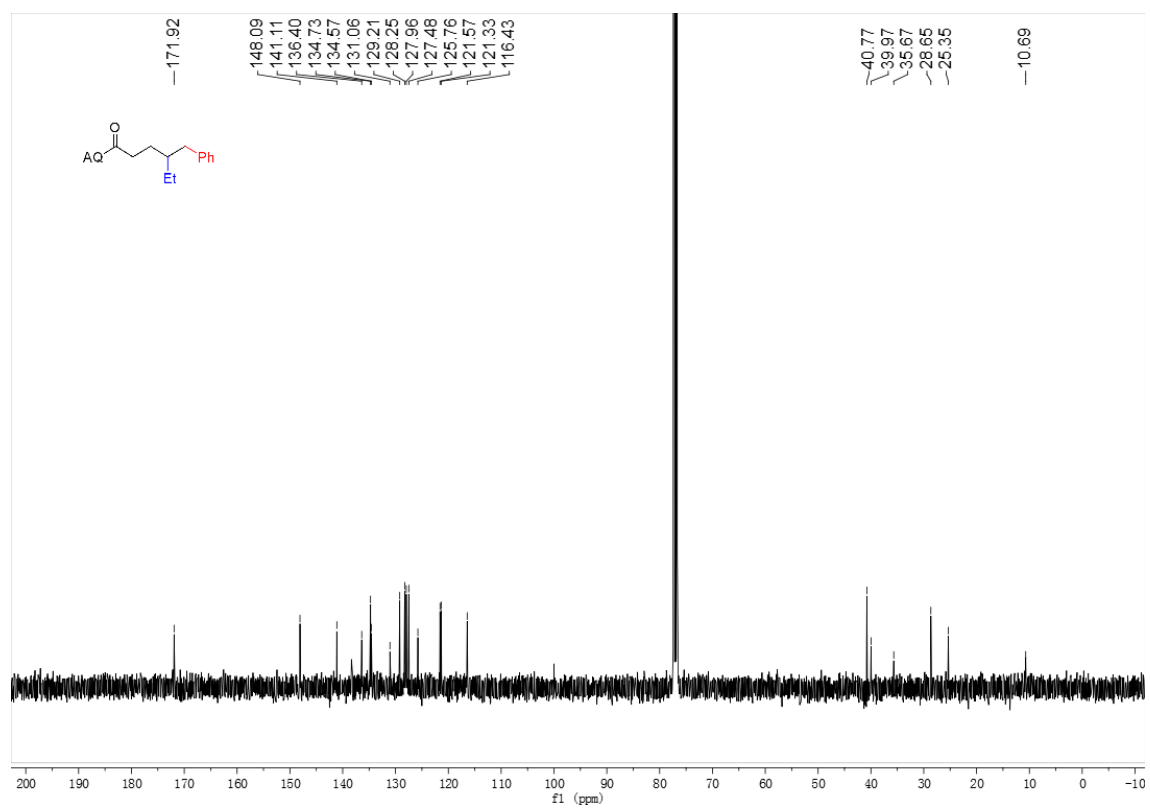

**Scheme 26.** <sup>1</sup>H NMR (400 MHz, CDCl<sub>3</sub>) and <sup>13</sup>C NMR (101 MHz, CDCl<sub>3</sub>) spectra of **2w**

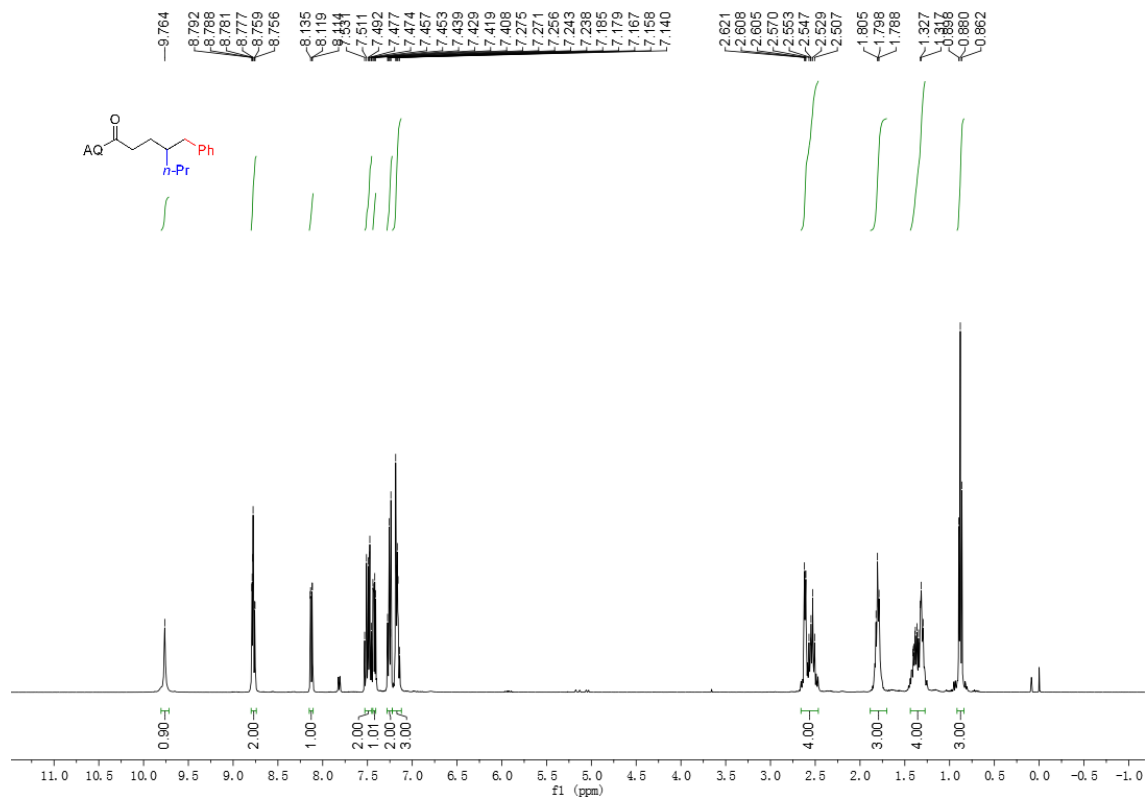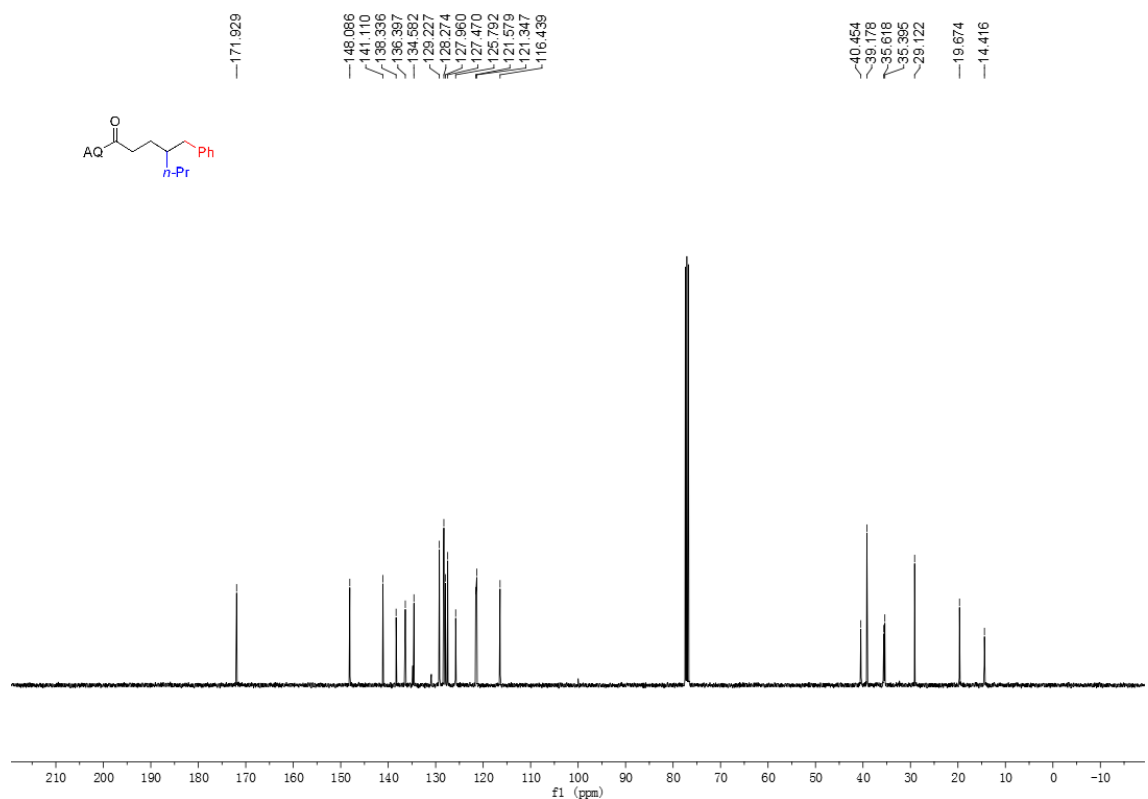

**Scheme 27.**  $^1\text{H}$  NMR (400 MHz,  $\text{CDCl}_3$ ) and  $^{13}\text{C}$  NMR (101 MHz,  $\text{CDCl}_3$ ) spectra of **2x**

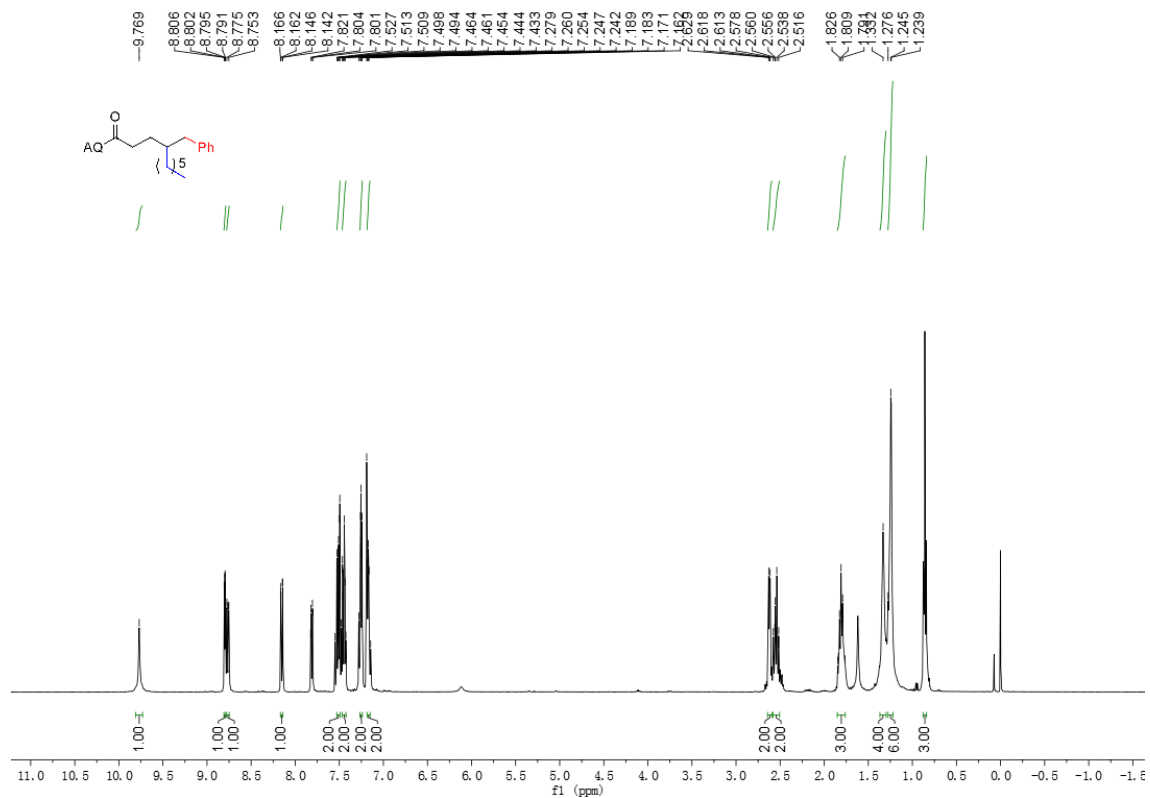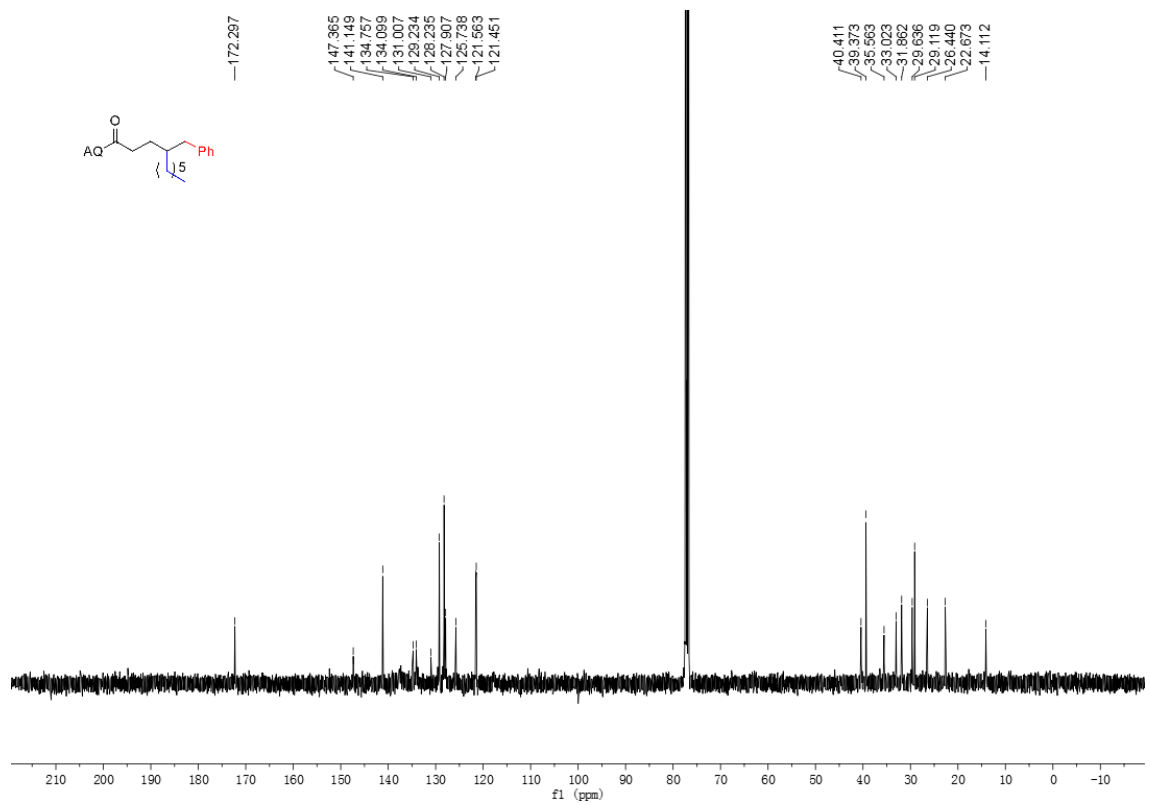

**Scheme 28.** <sup>1</sup>H NMR (400 MHz, CDCl<sub>3</sub>) and <sup>13</sup>C NMR (101 MHz, CDCl<sub>3</sub>) spectra of **2y**







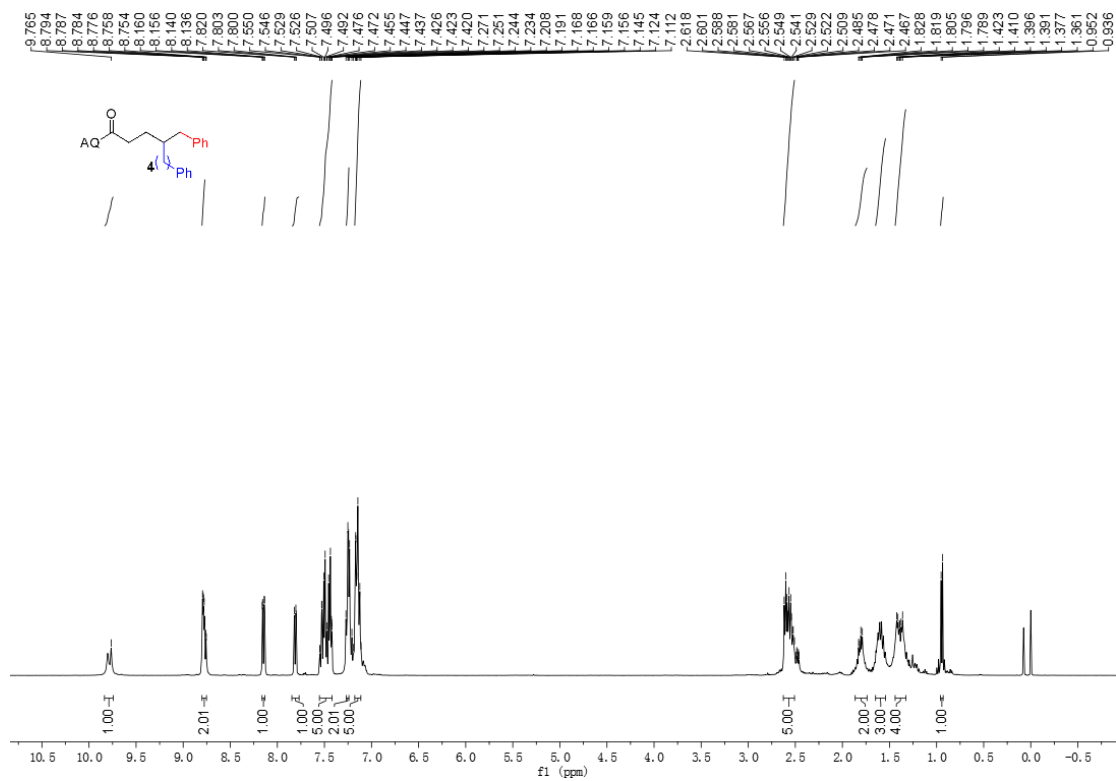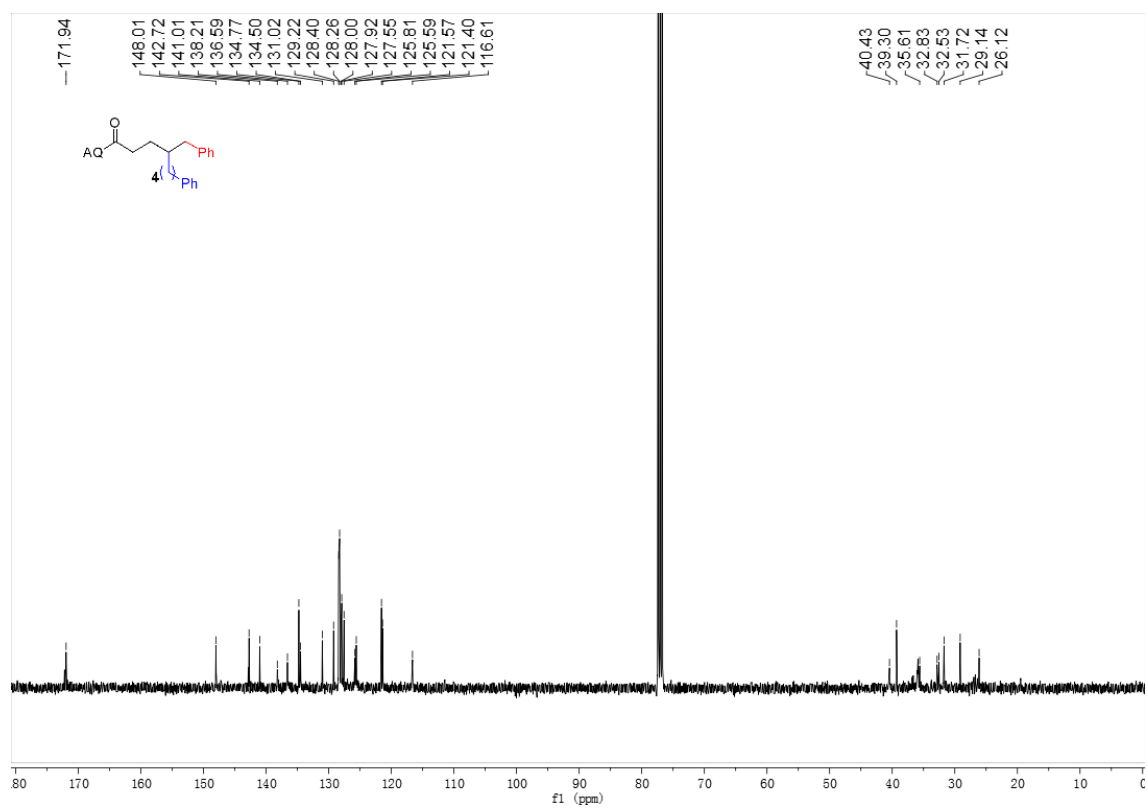

**Scheme 31.** <sup>1</sup>H NMR (400 MHz, CDCl<sub>3</sub>) and <sup>13</sup>C NMR (101 MHz, CDCl<sub>3</sub>) spectra of **2ab**

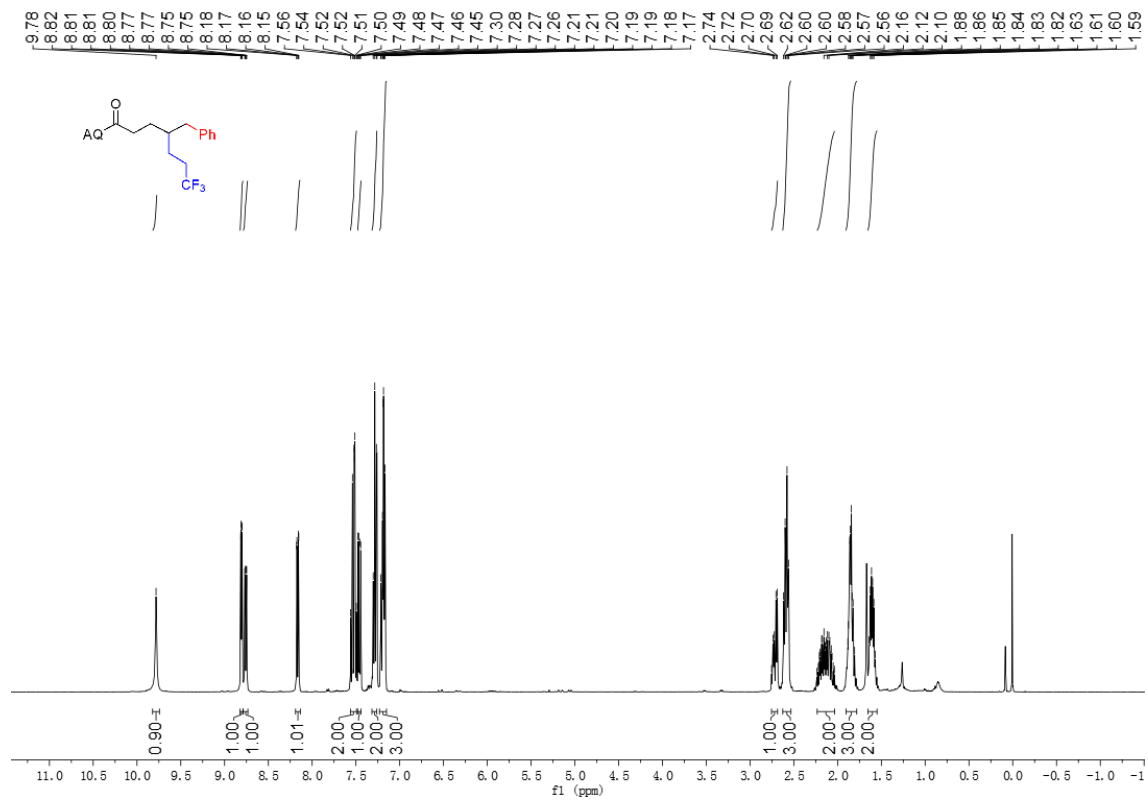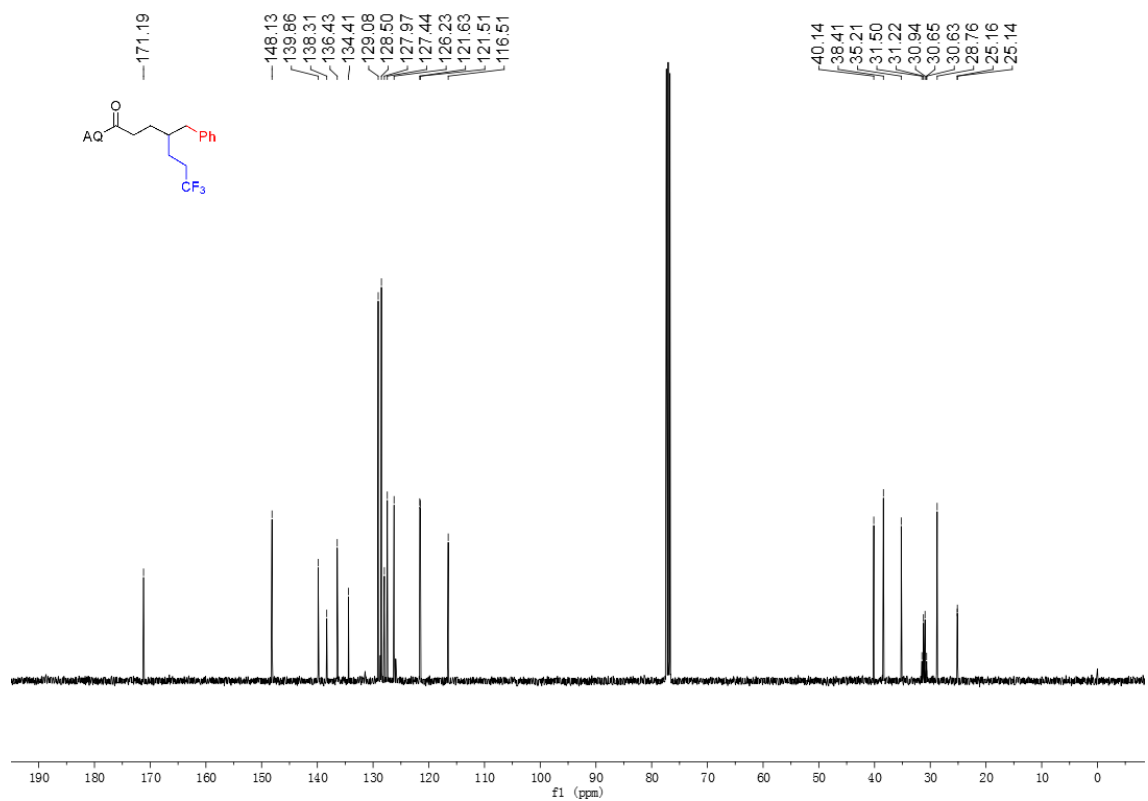

**Scheme 32.** <sup>1</sup>H NMR (400 MHz, CDCl<sub>3</sub>) and <sup>13</sup>C NMR (101 MHz, CDCl<sub>3</sub>) spectra of **2ac**

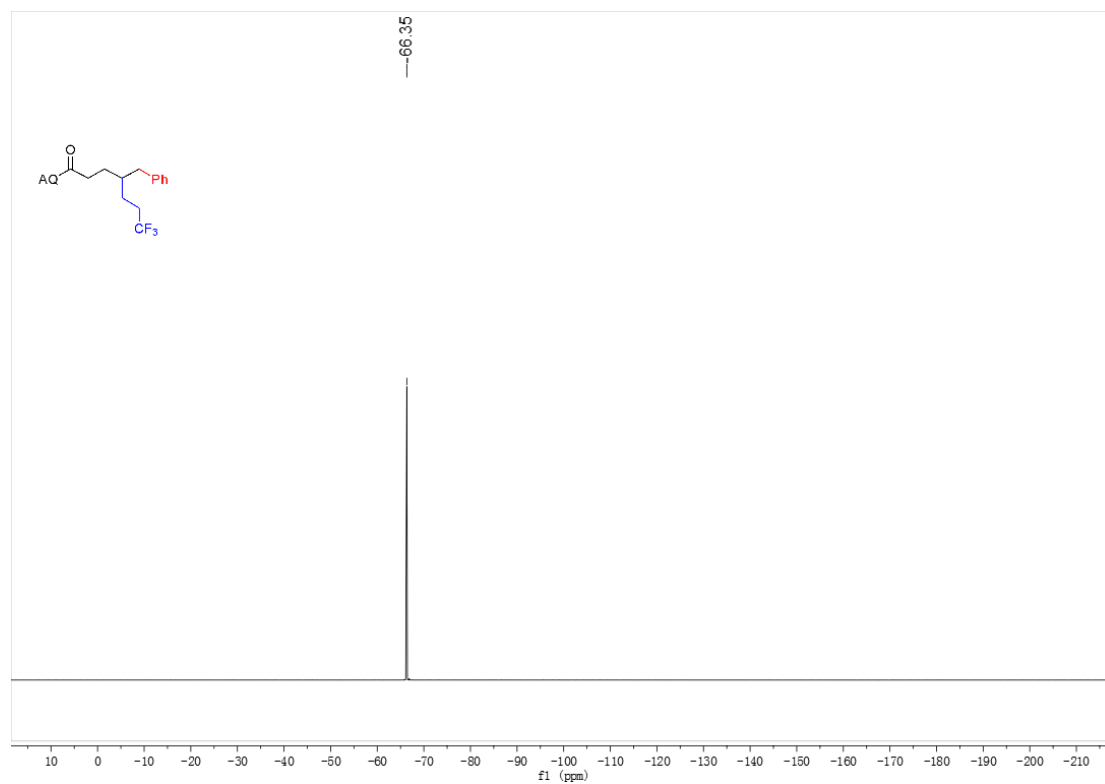

**Scheme 33.** <sup>19</sup>F NMR (376 MHz, CDCl<sub>3</sub>) spectra of **2ac**

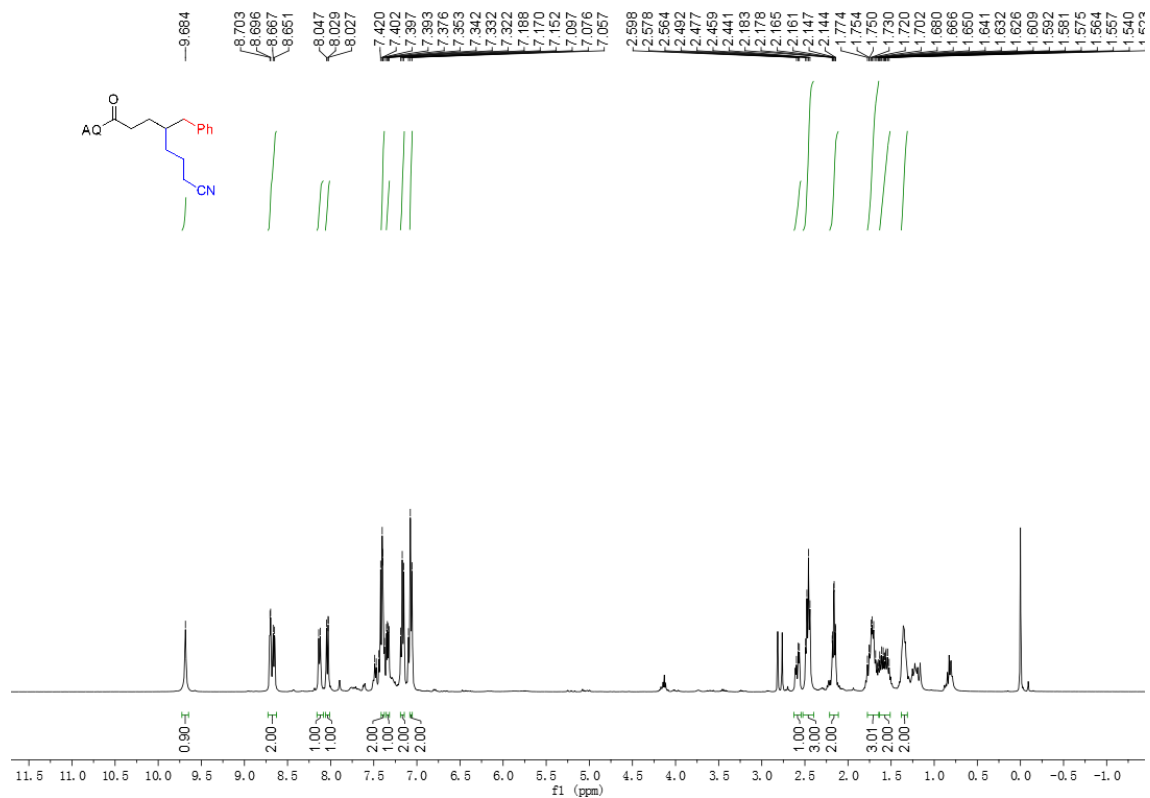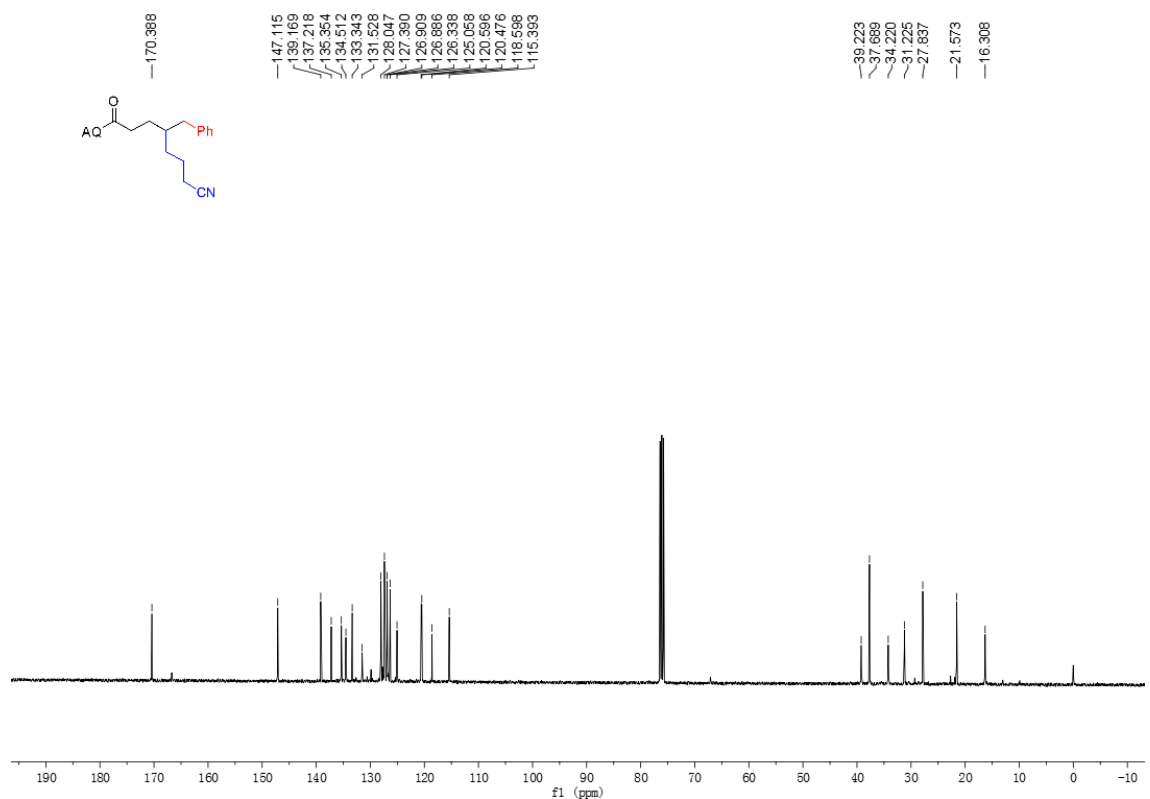

**Scheme 34.** <sup>1</sup>H NMR (400 MHz, CDCl<sub>3</sub>) and <sup>13</sup>C NMR(101 MHz, CDCl<sub>3</sub>) spectra of **2ad**

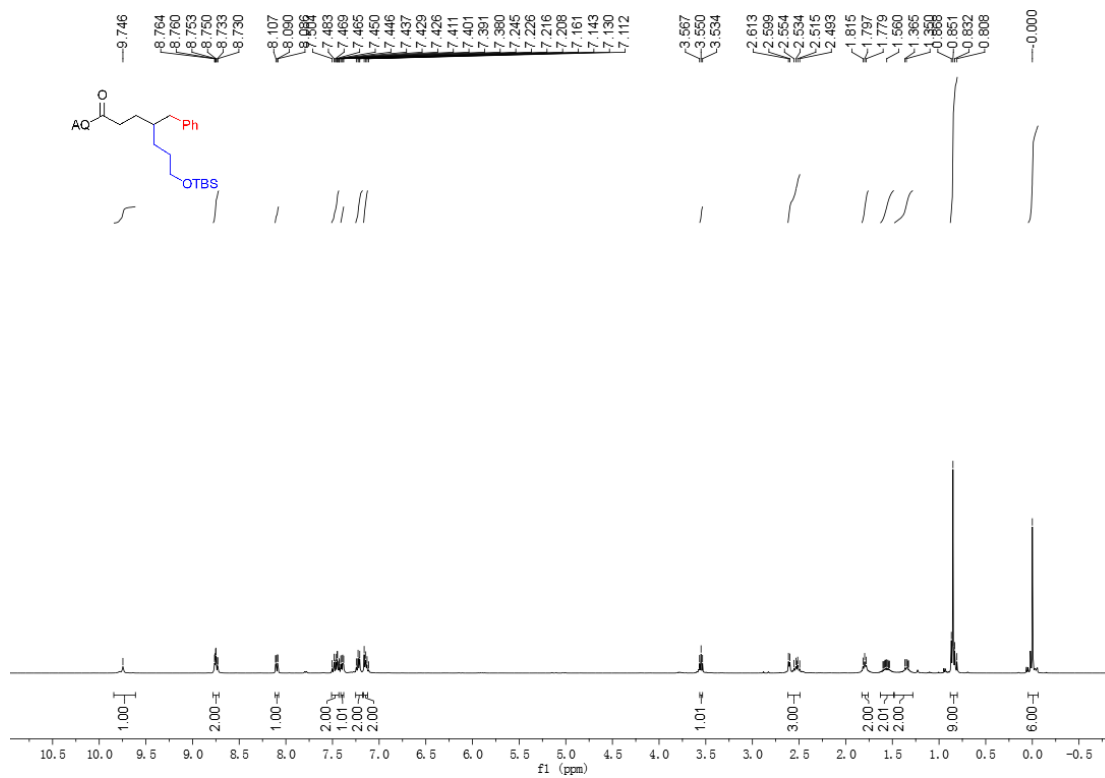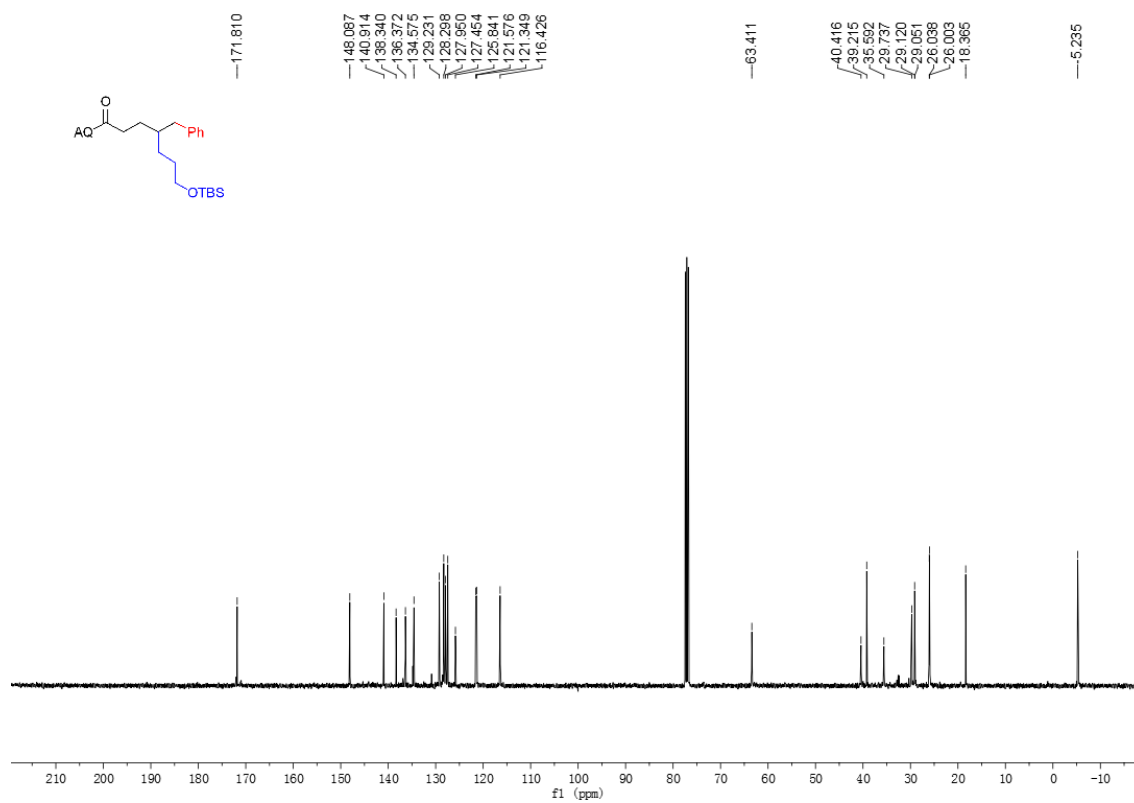

**Scheme 35.** <sup>1</sup>H NMR (400 MHz, CDCl<sub>3</sub>) and <sup>13</sup>C NMR (101 MHz, CDCl<sub>3</sub>) spectra of **2ae**

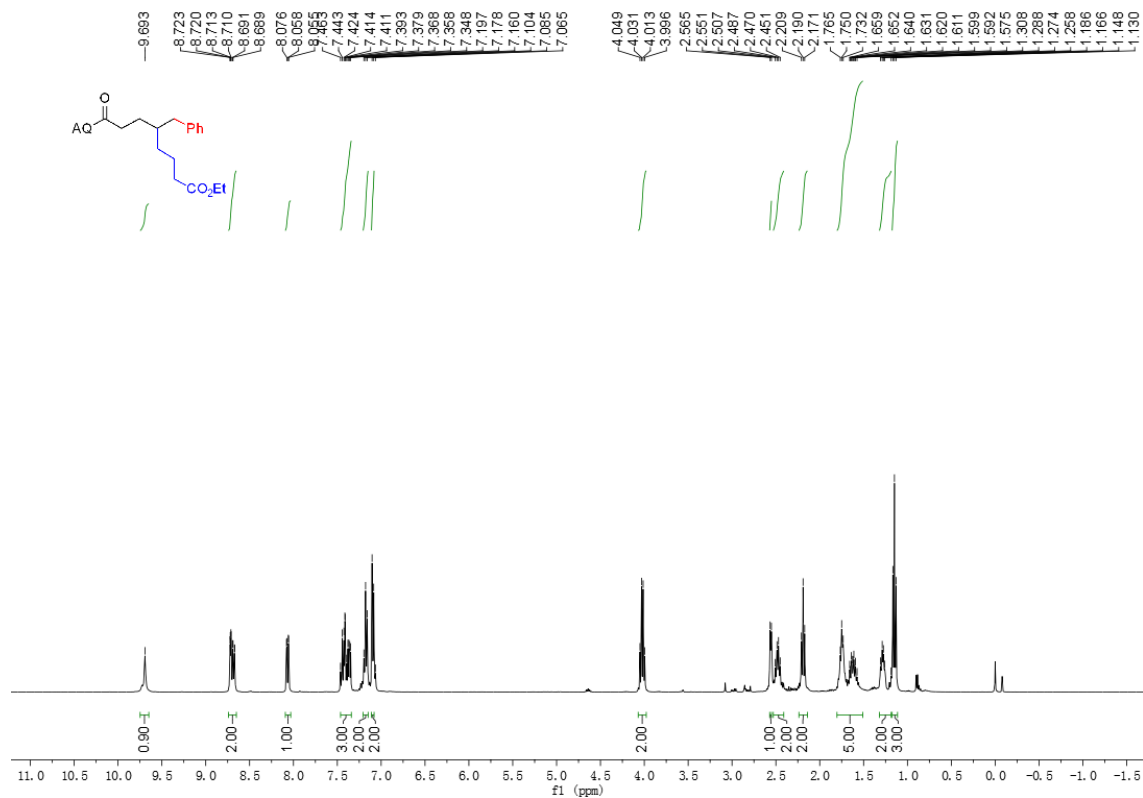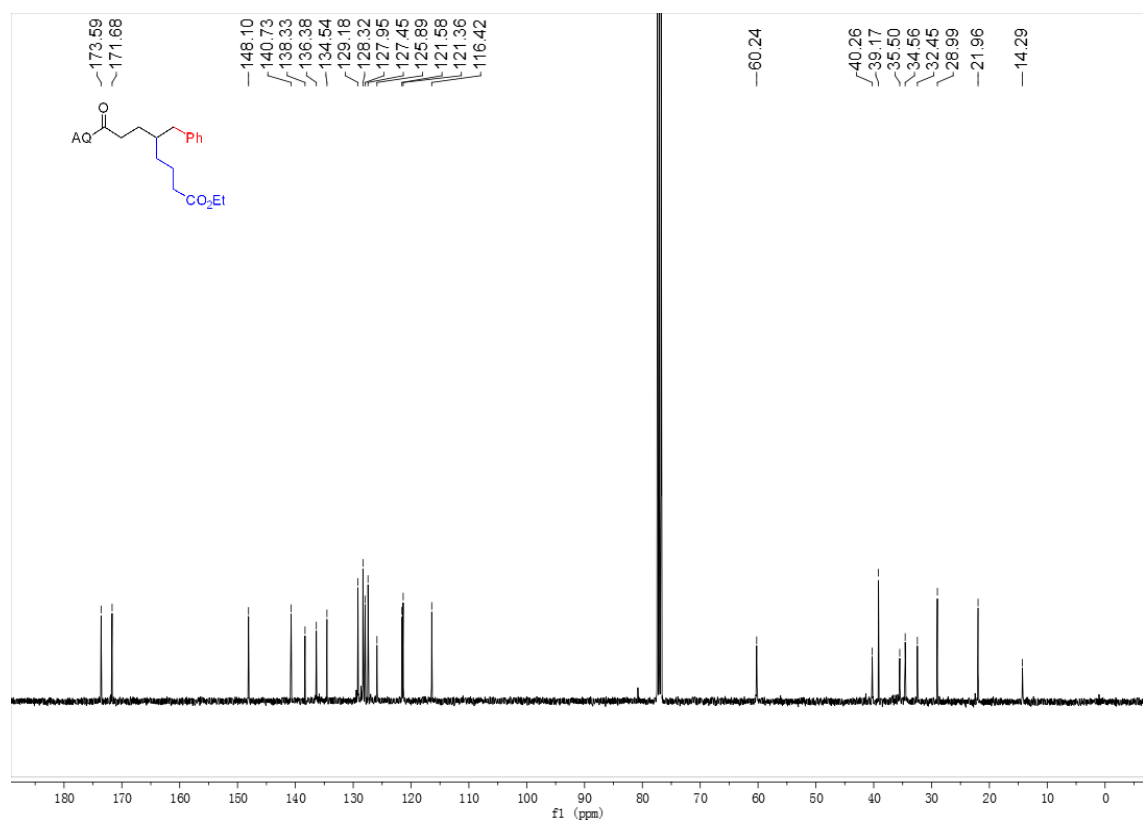

**Scheme 36.**  $^1\text{H}$  NMR (400 MHz,  $\text{CDCl}_3$ ) and  $^{13}\text{C}$  NMR (101 MHz,  $\text{CDCl}_3$ ) spectra of **2af**

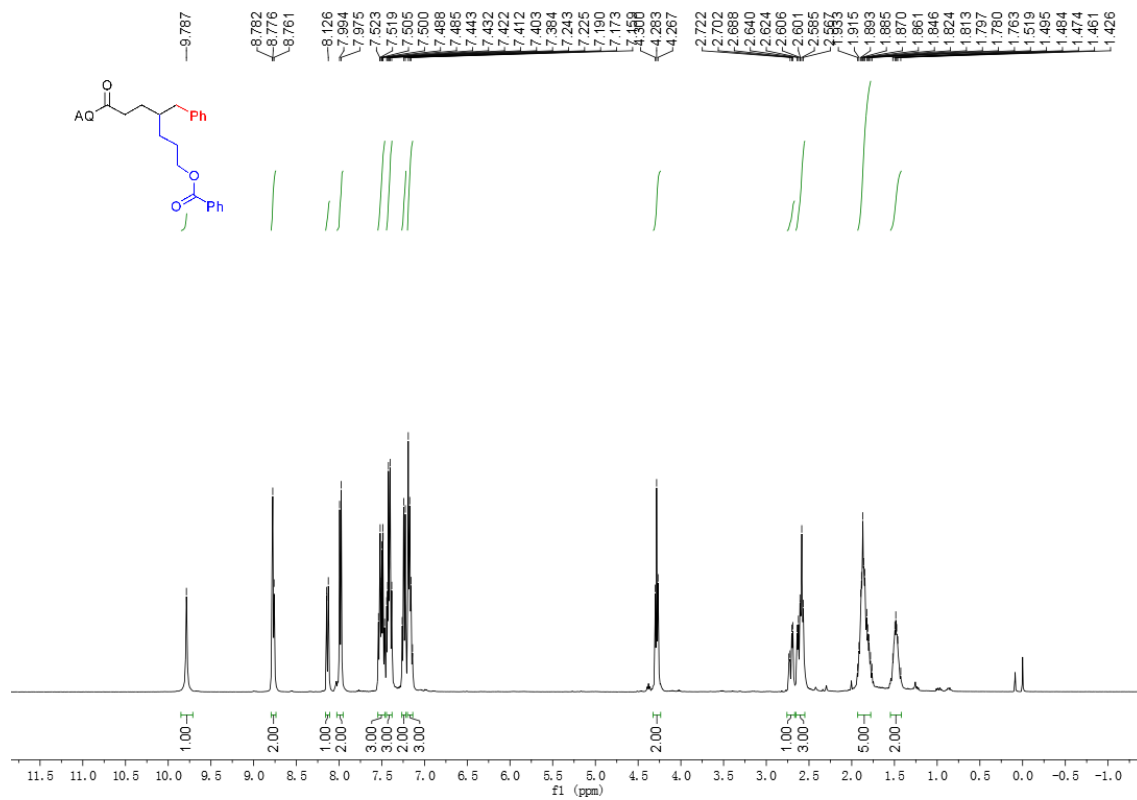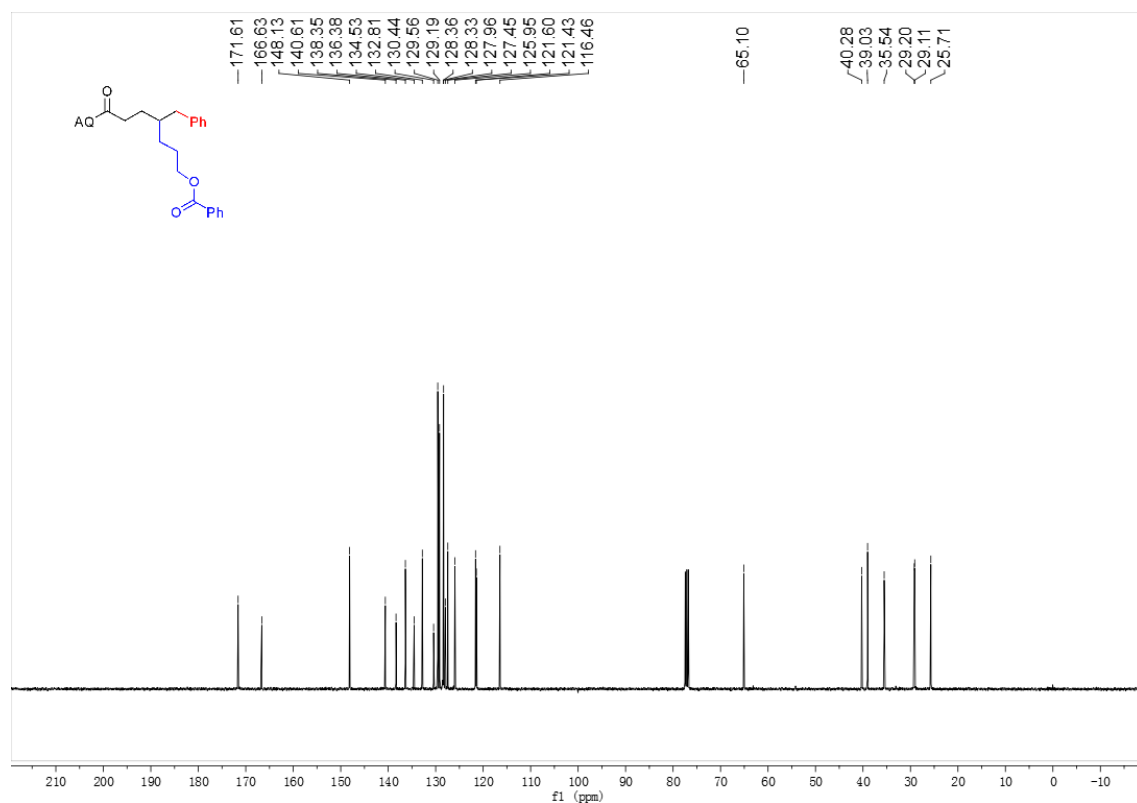

**Scheme 37.** <sup>1</sup>H NMR (400 MHz, CDCl<sub>3</sub>) and <sup>13</sup>C NMR (101 MHz, CDCl<sub>3</sub>) spectra of **2ag**



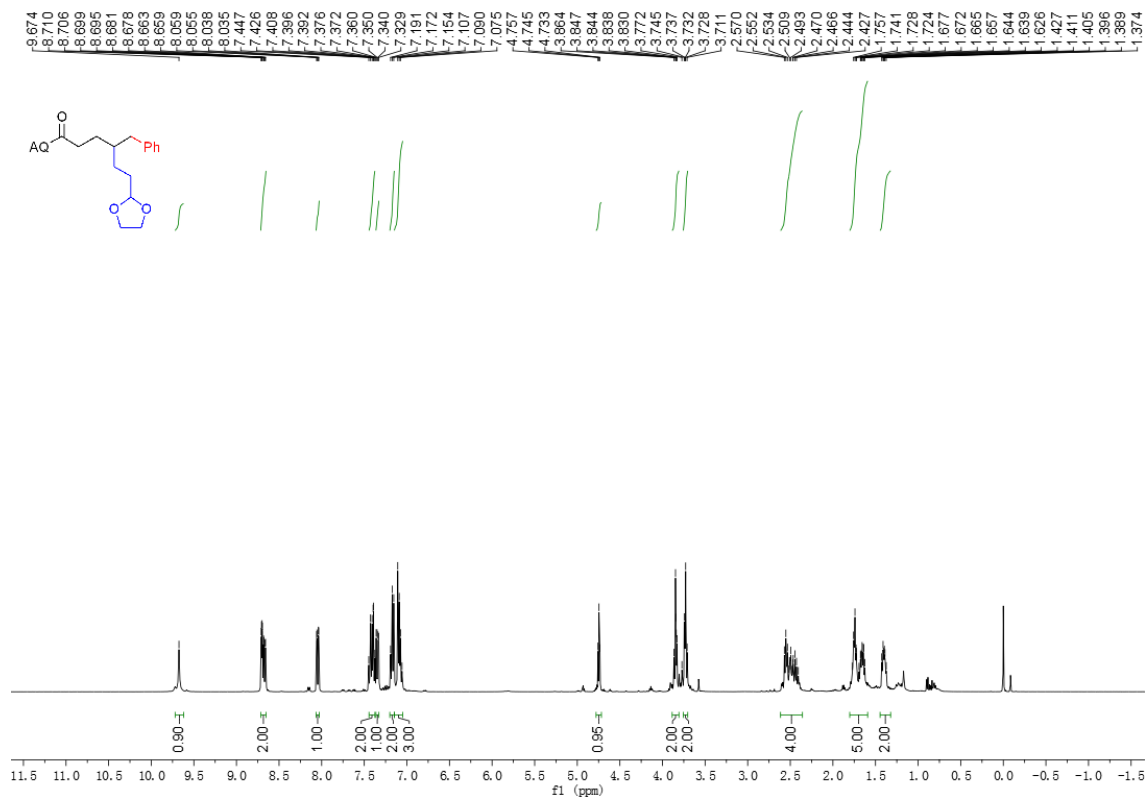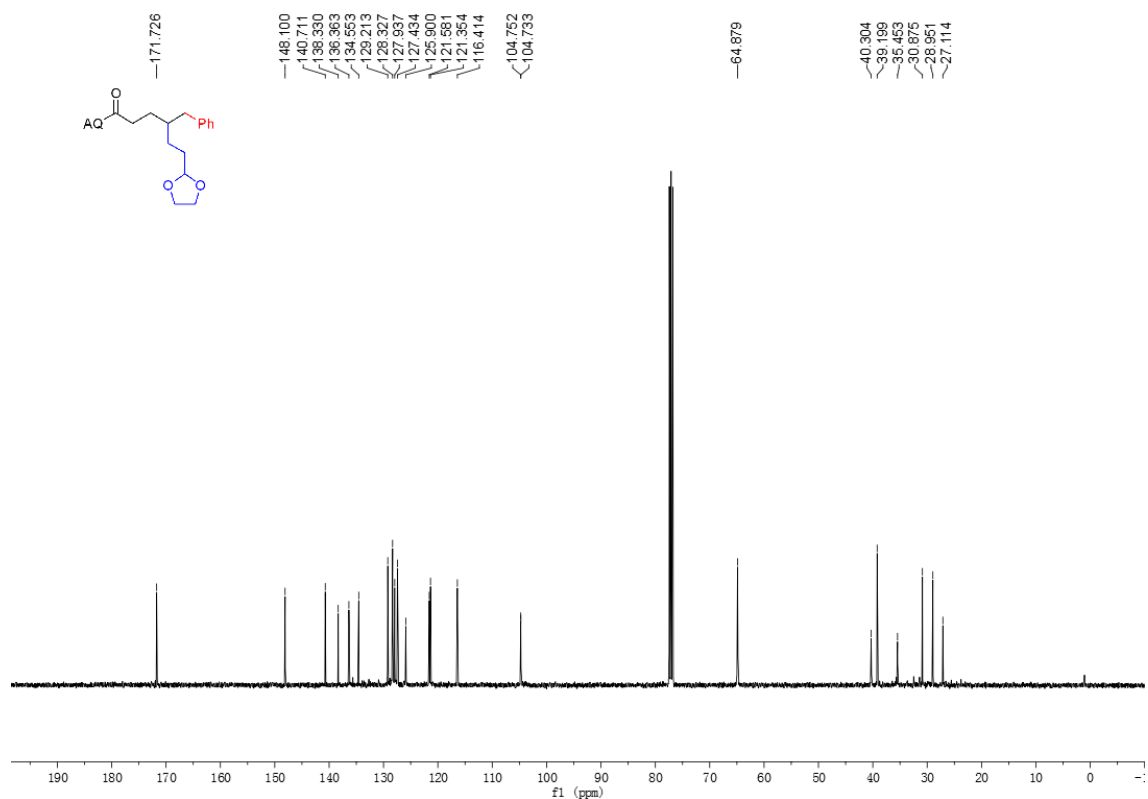

**Scheme 38.**  $^1\text{H}$  NMR (400 MHz,  $\text{CDCl}_3$ ) and  $^{13}\text{C}$  NMR (101 MHz,  $\text{CDCl}_3$ ) spectra of **2ah**

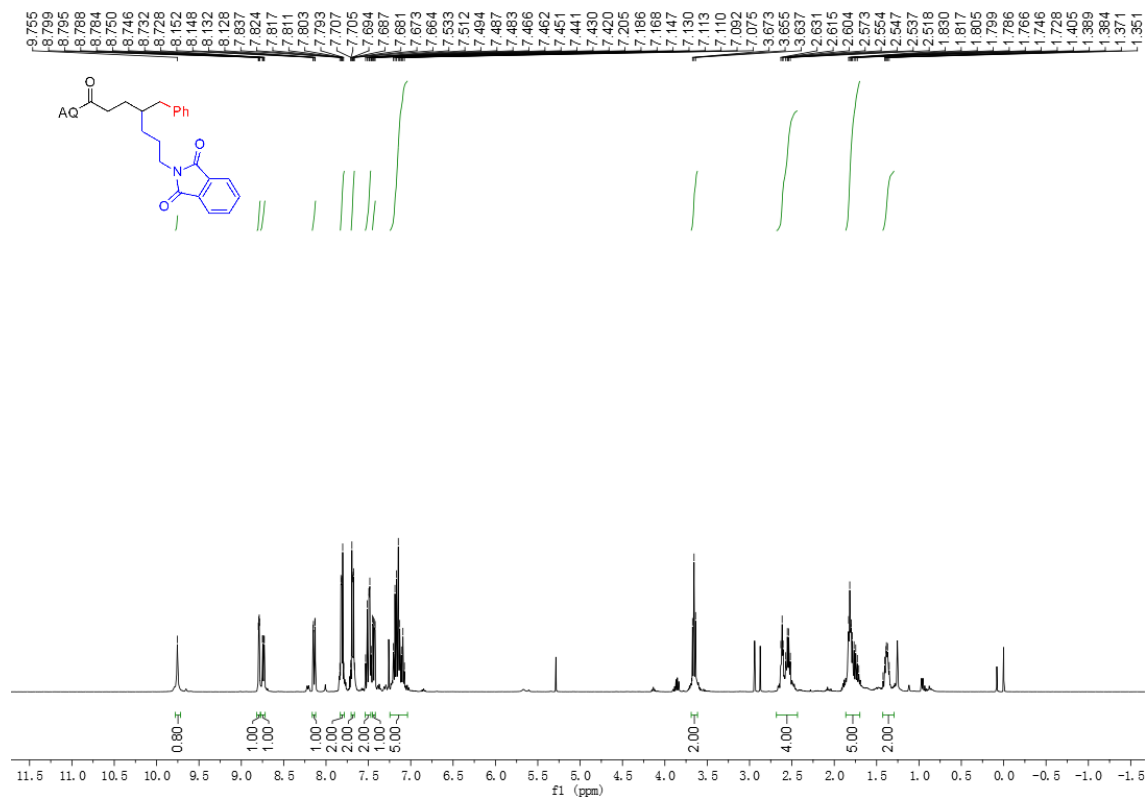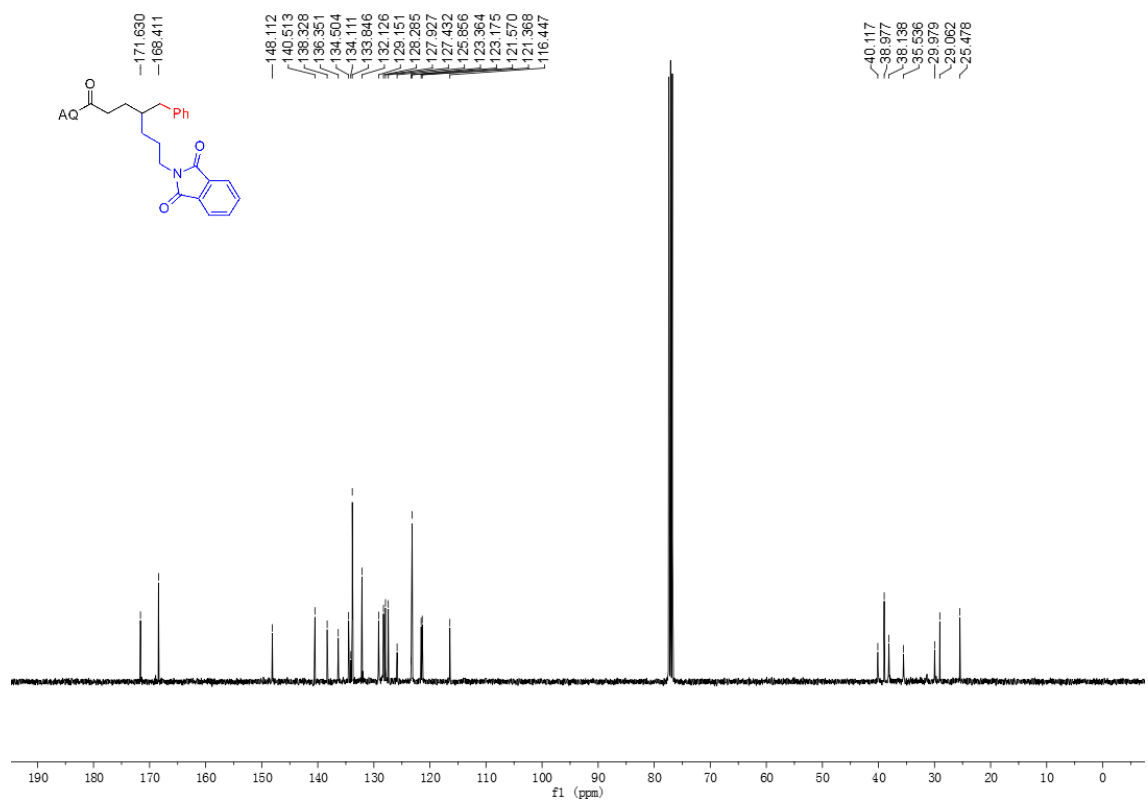

**Scheme 39.** <sup>1</sup>H NMR (400 MHz, CDCl<sub>3</sub>) and <sup>13</sup>C NMR (101 MHz, CDCl<sub>3</sub>) spectra of 2ai

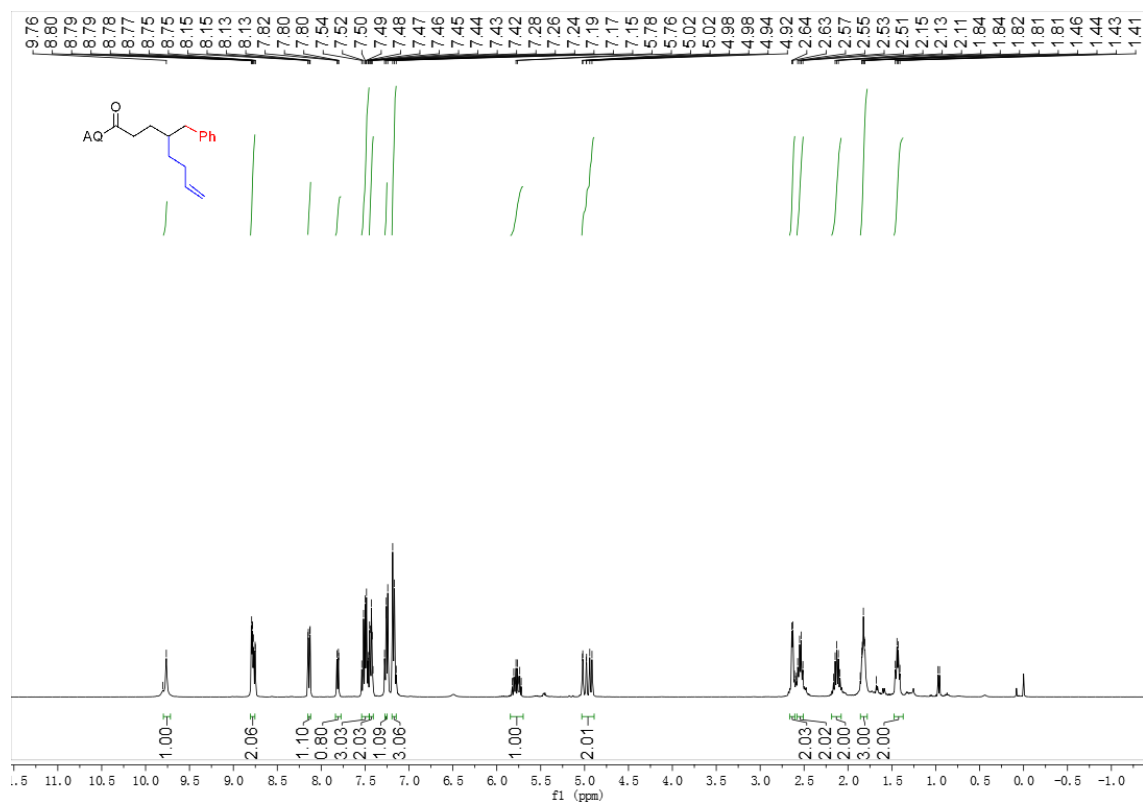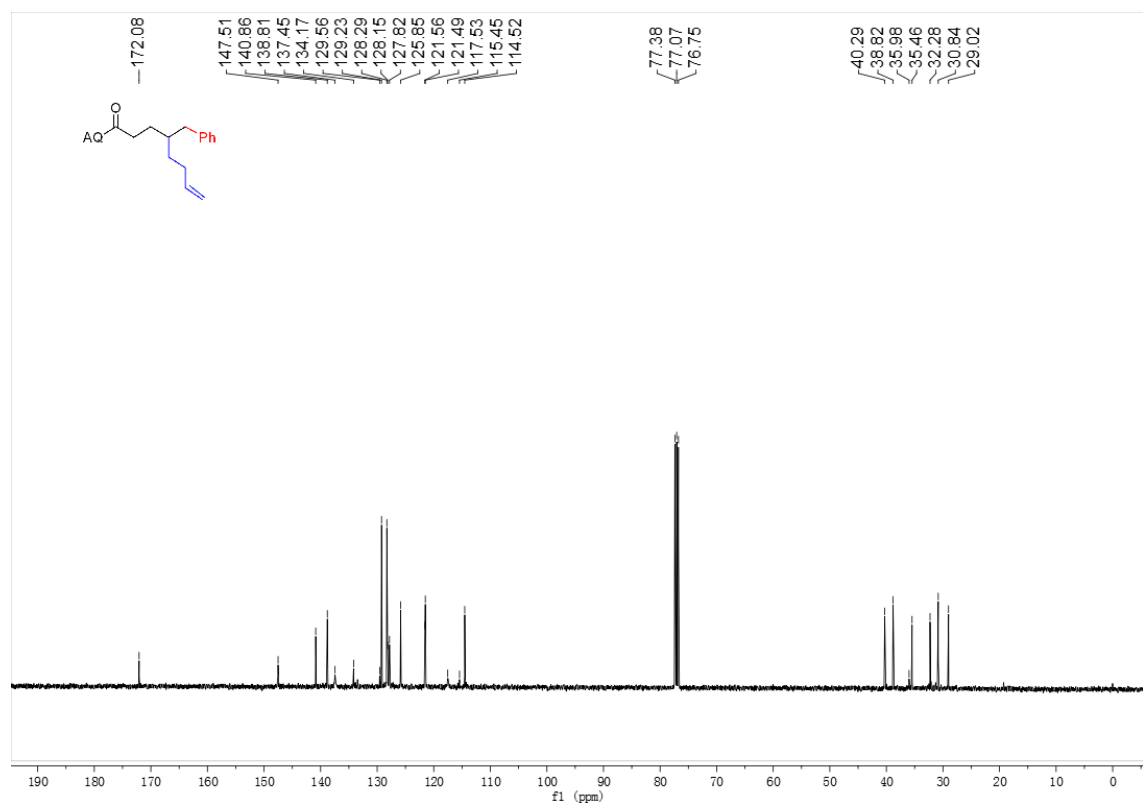

**Scheme 40.** <sup>1</sup>H NMR (400 MHz, CDCl<sub>3</sub>) and <sup>13</sup>C NMR (101 MHz, CDCl<sub>3</sub>) spectra of 2aj

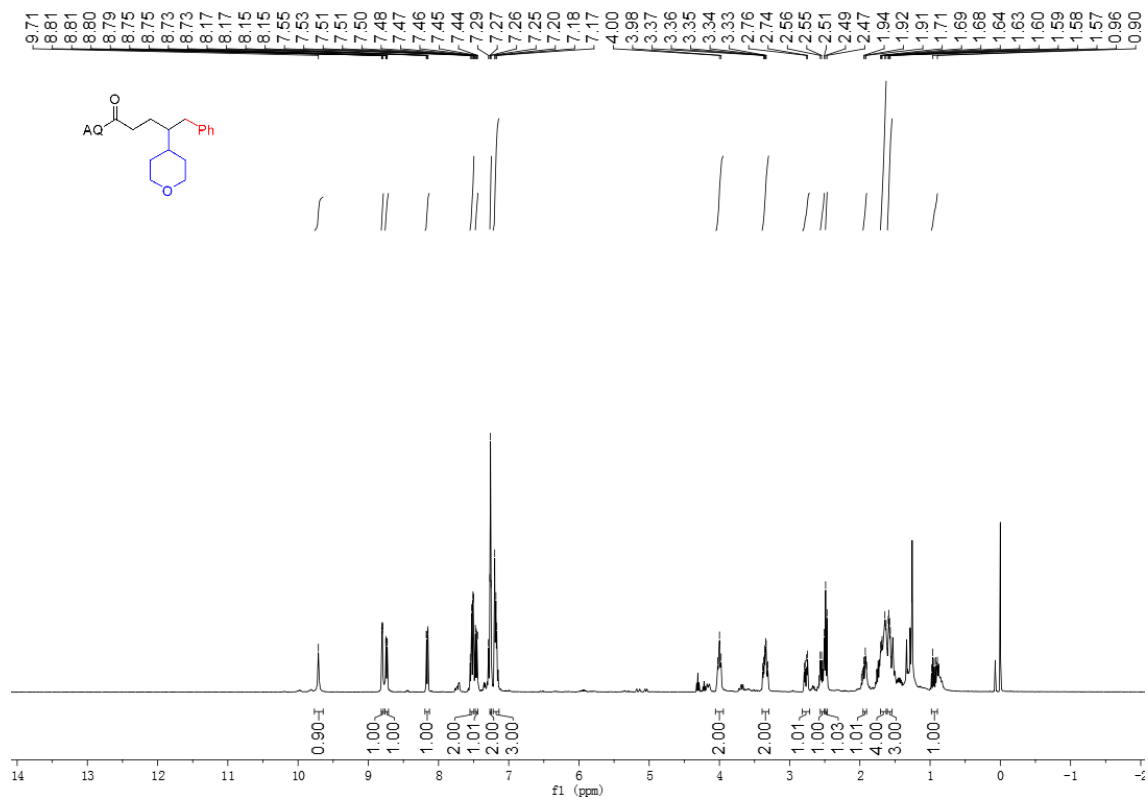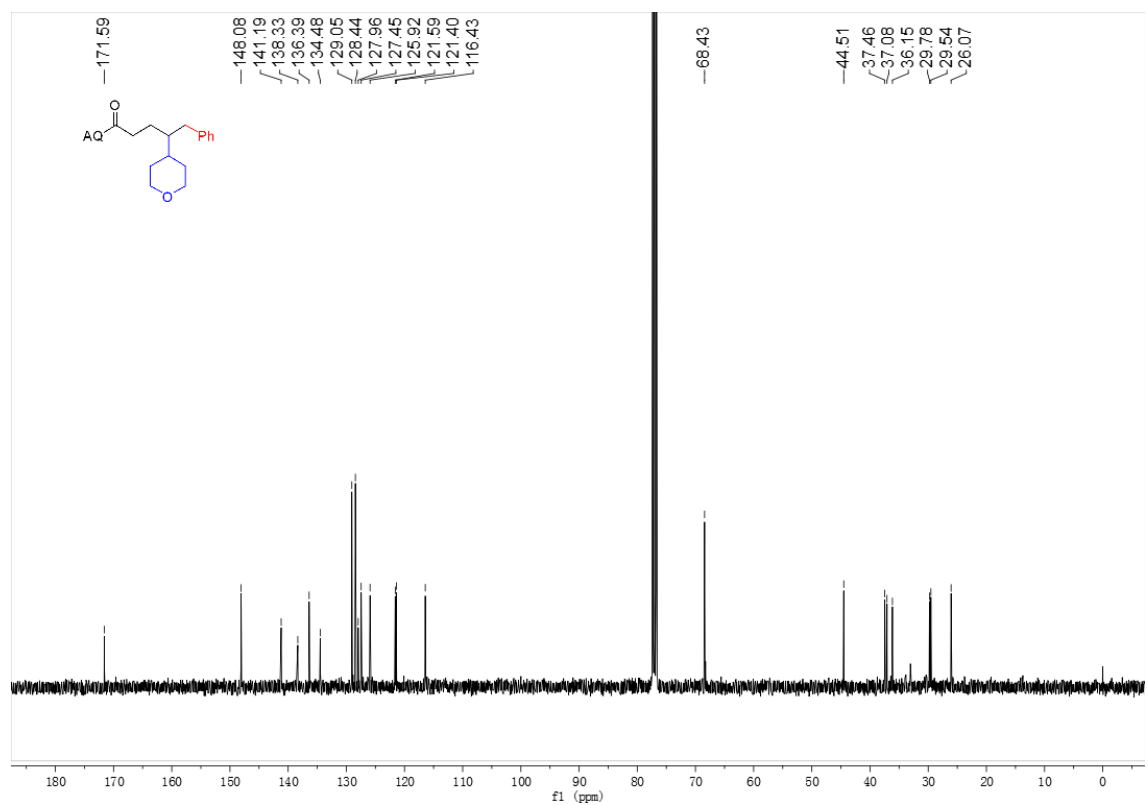

**Scheme 41.** <sup>1</sup>H NMR (400 MHz, CDCl<sub>3</sub>) and <sup>13</sup>C NMR (101 MHz, CDCl<sub>3</sub>) spectra of **2ak**

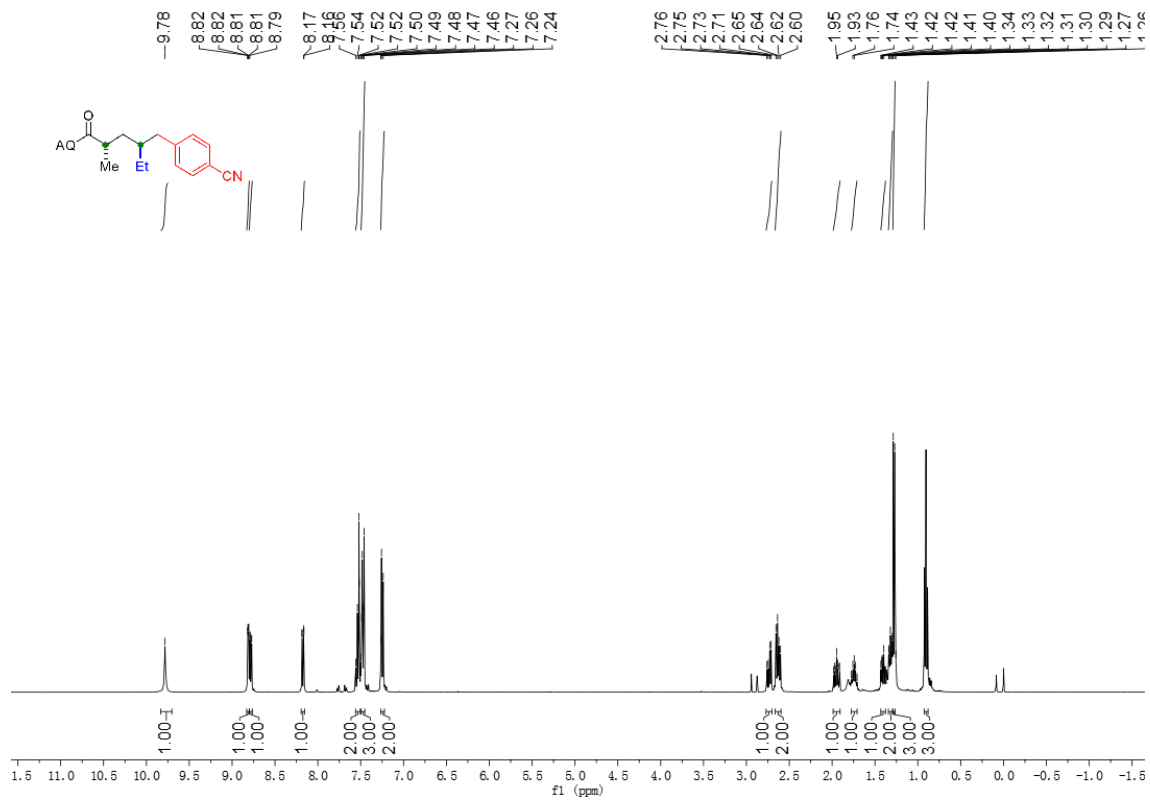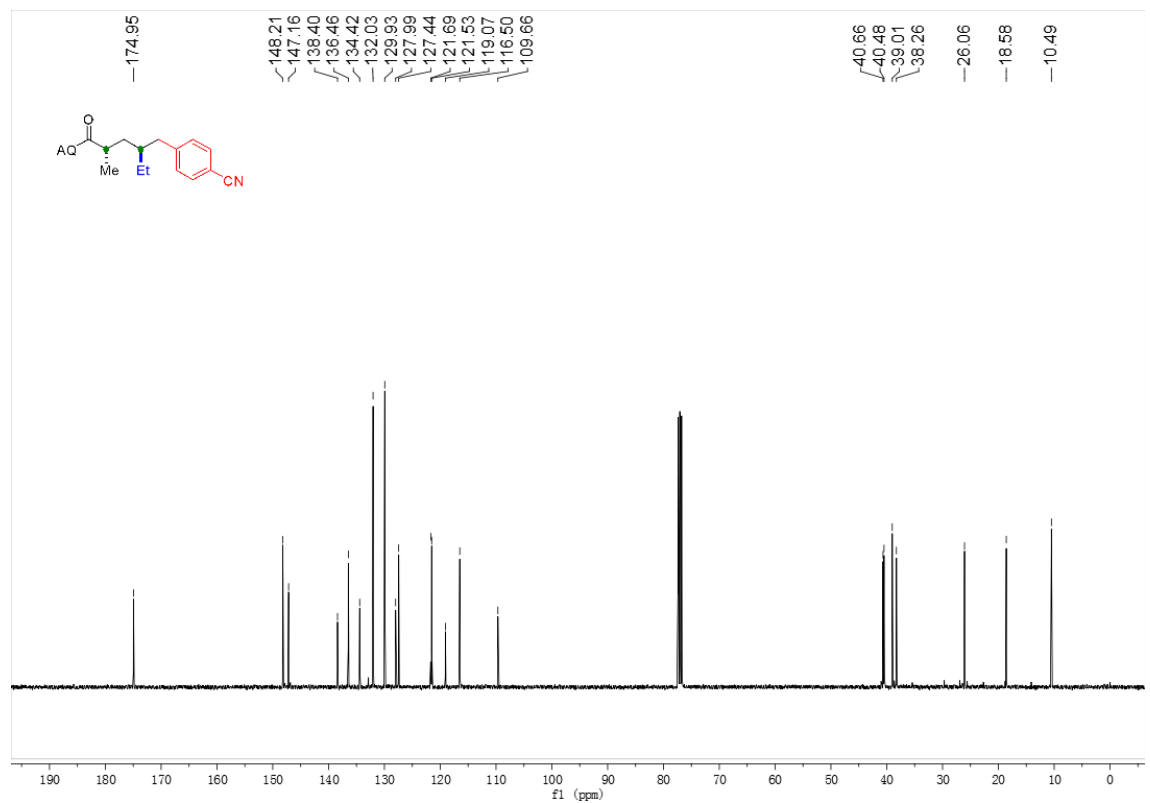

**Scheme 42.** <sup>1</sup>H NMR (400 MHz, CDCl<sub>3</sub>) and <sup>13</sup>C NMR (101 MHz, CDCl<sub>3</sub>) spectra of **2a**

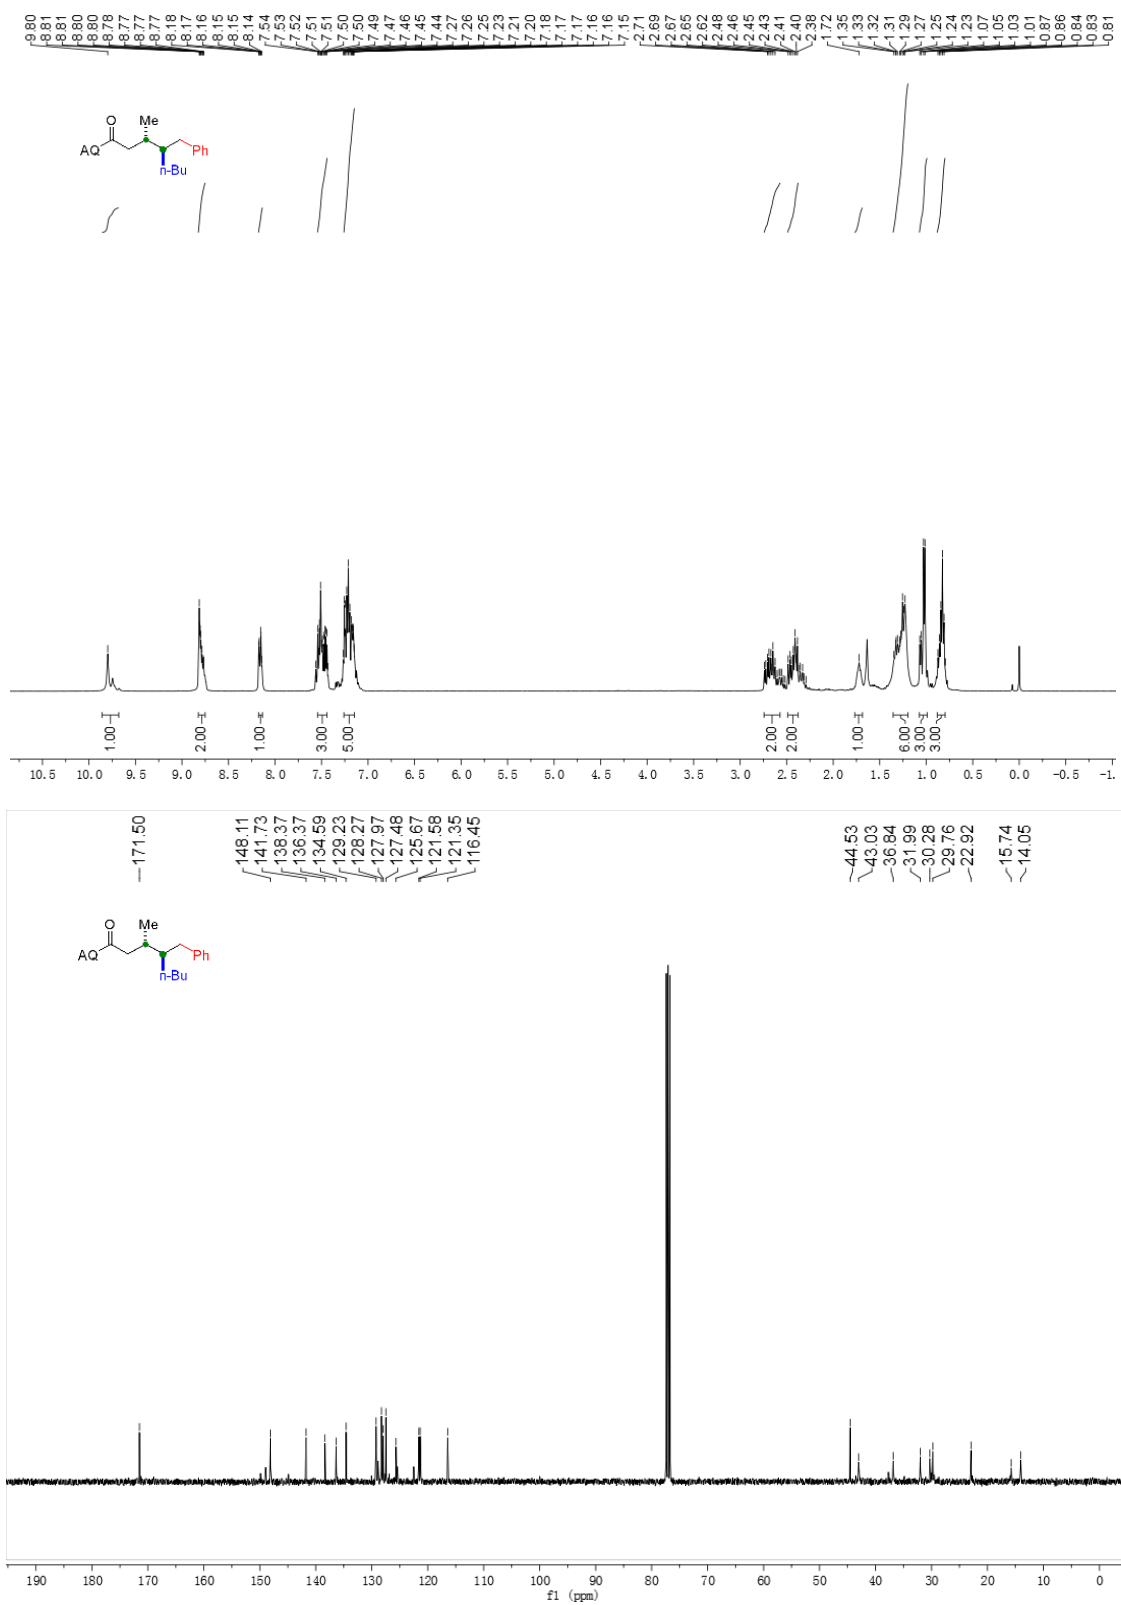

**Scheme 43.** <sup>1</sup>H NMR (400 MHz, CDCl<sub>3</sub>) and <sup>13</sup>C NMR (101 MHz, CDCl<sub>3</sub>) spectra of **2am**

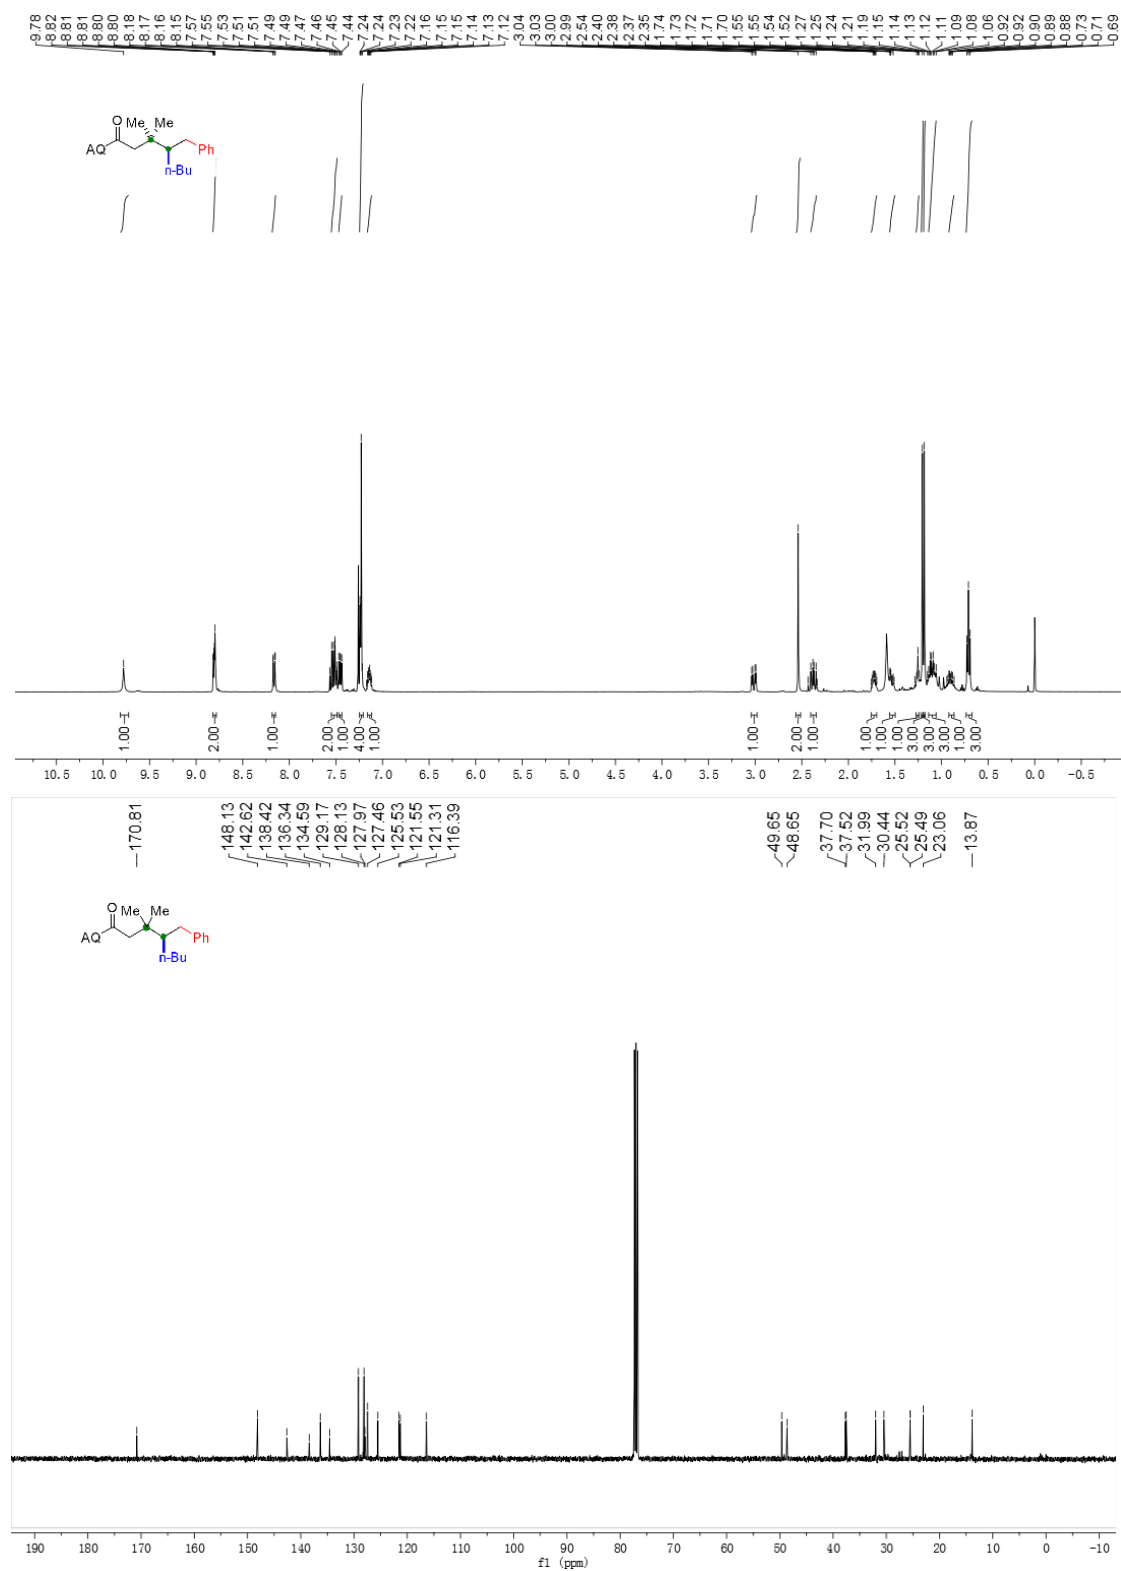

**Scheme 44.** <sup>1</sup>H NMR (400 MHz, CDCl<sub>3</sub>) and <sup>13</sup>C NMR (101 MHz, CDCl<sub>3</sub>) spectra of **2an**

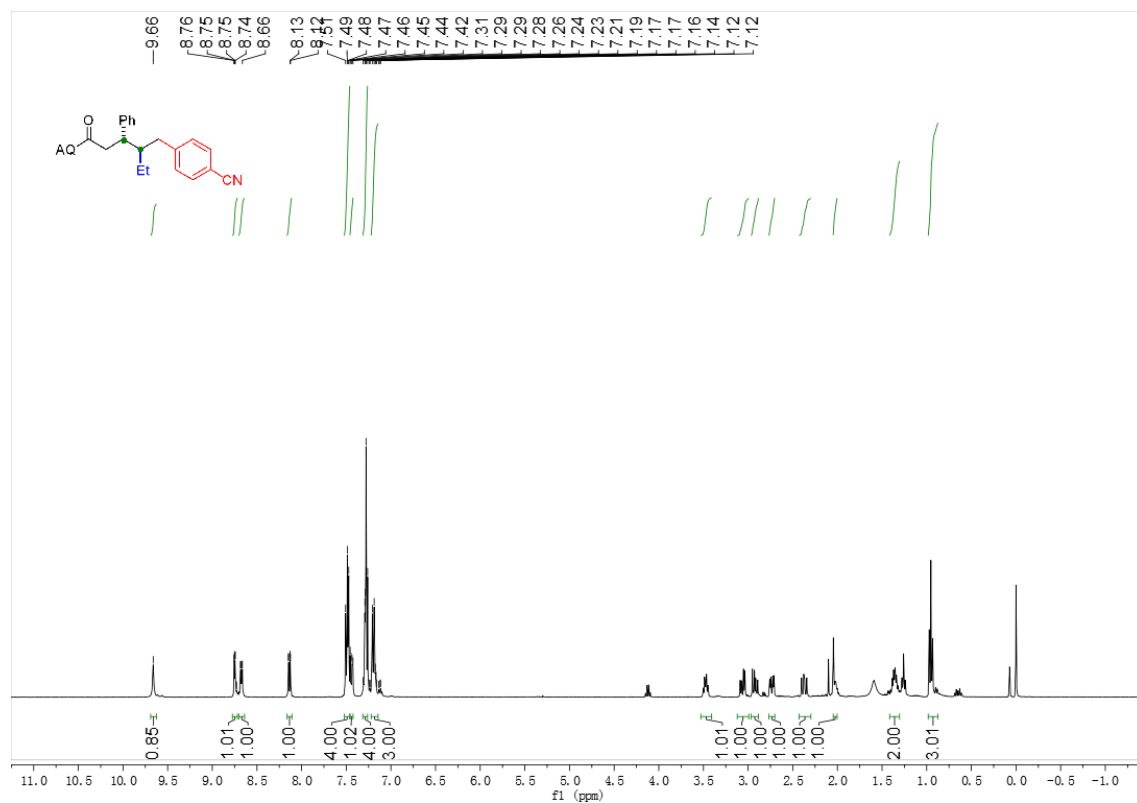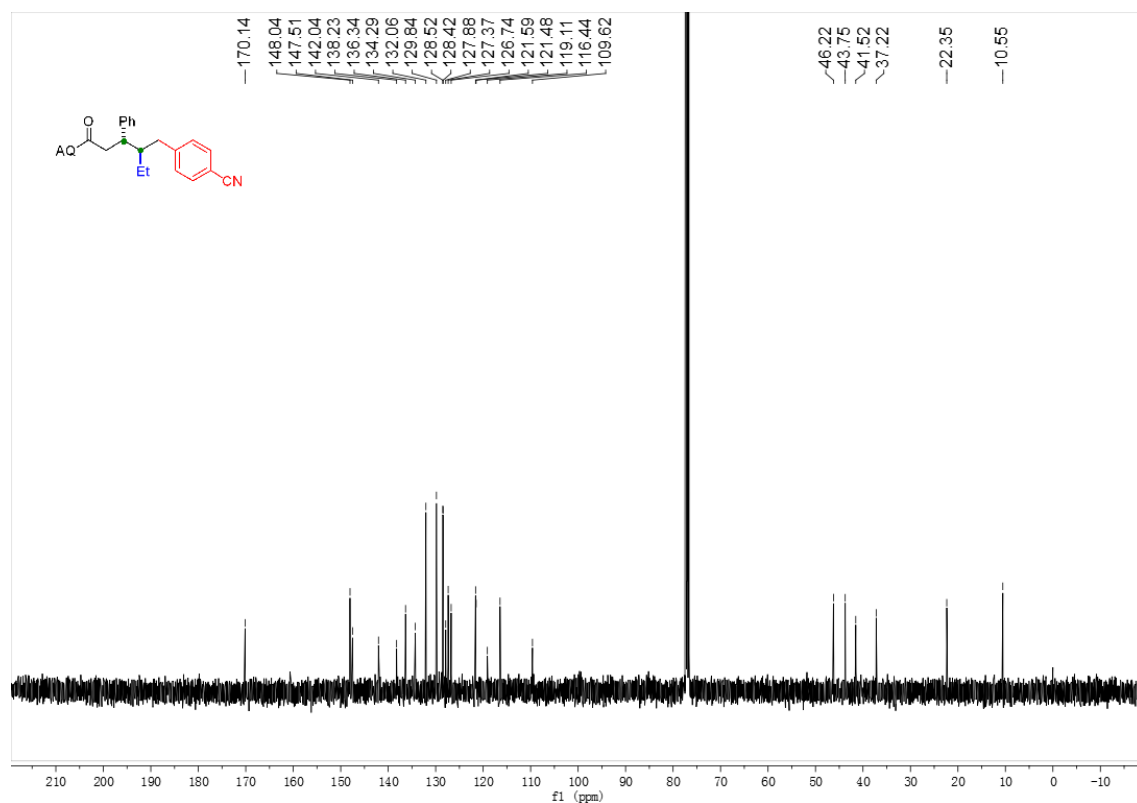

**Scheme 45.** <sup>1</sup>H NMR (400 MHz, CDCl<sub>3</sub>) and <sup>13</sup>C NMR (101 MHz, CDCl<sub>3</sub>) spectra of 2ao



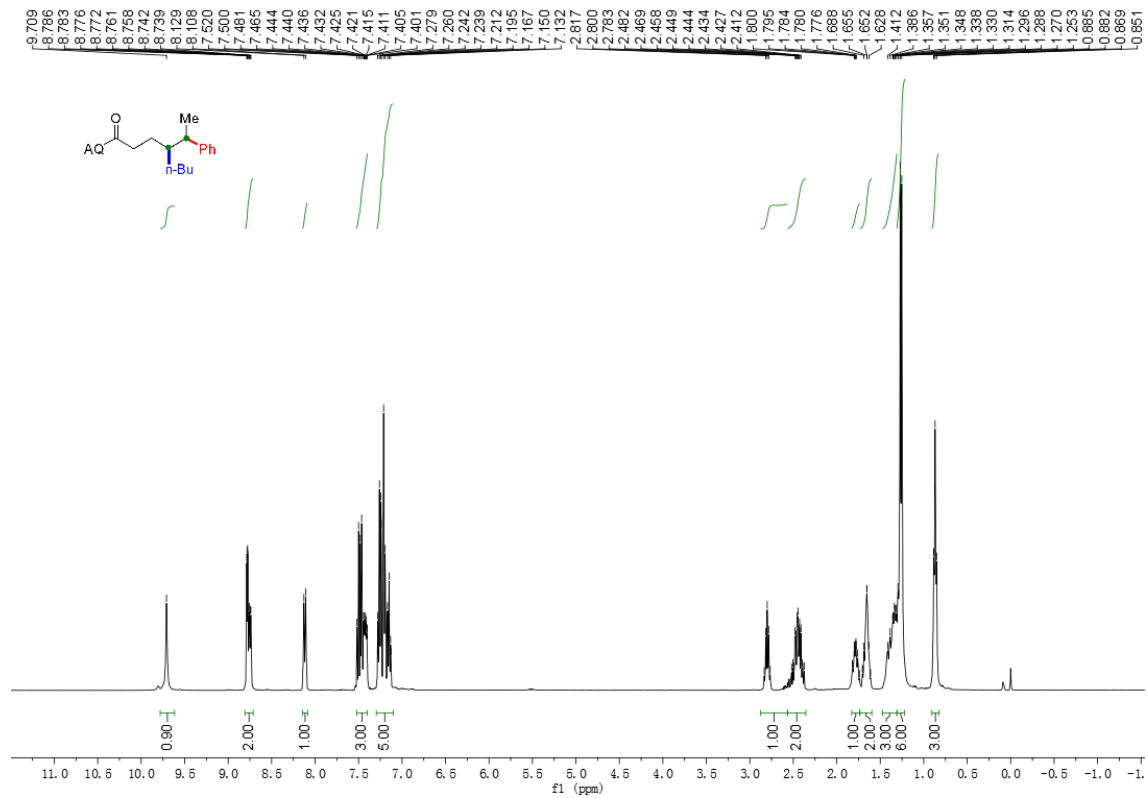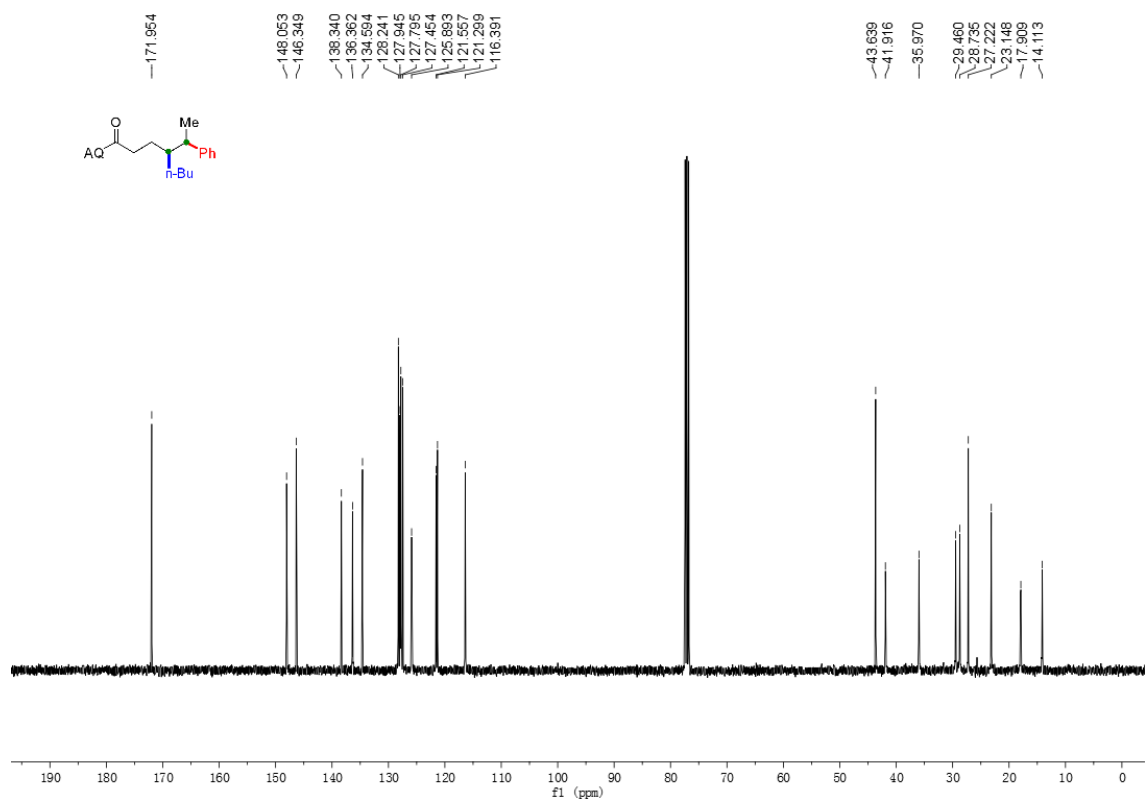

**Scheme 46.** <sup>1</sup>H NMR (400 MHz, CDCl<sub>3</sub>) and <sup>13</sup>C NMR (101 MHz, CDCl<sub>3</sub>) spectra of **2ap**

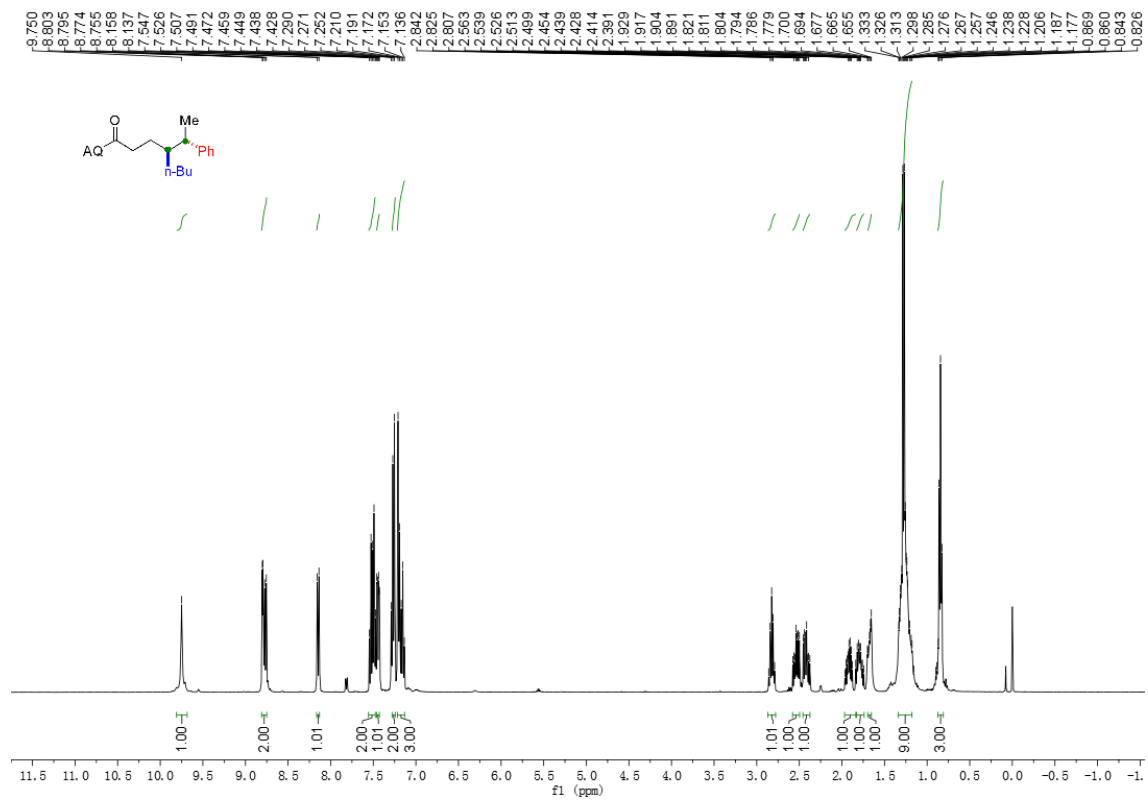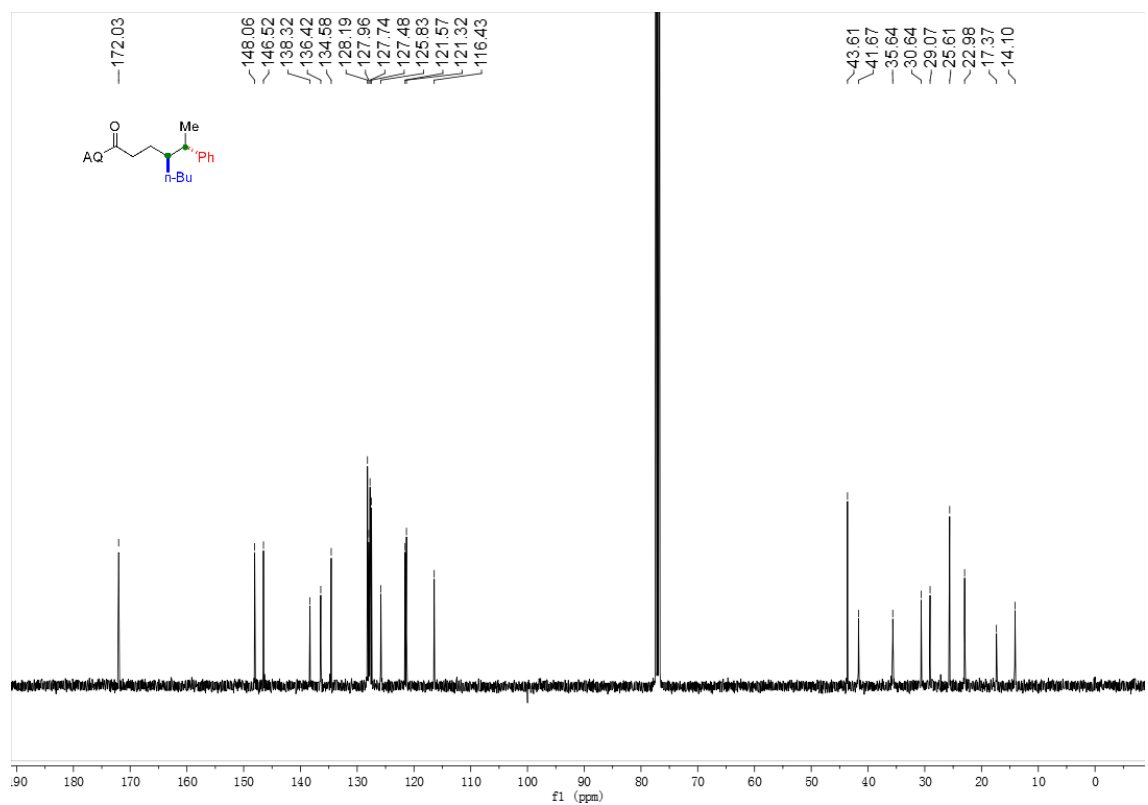

**Scheme 47.** <sup>1</sup>H NMR (400 MHz, CDCl<sub>3</sub>) and <sup>13</sup>C NMR (101 MHz, CDCl<sub>3</sub>) spectra of 2aq

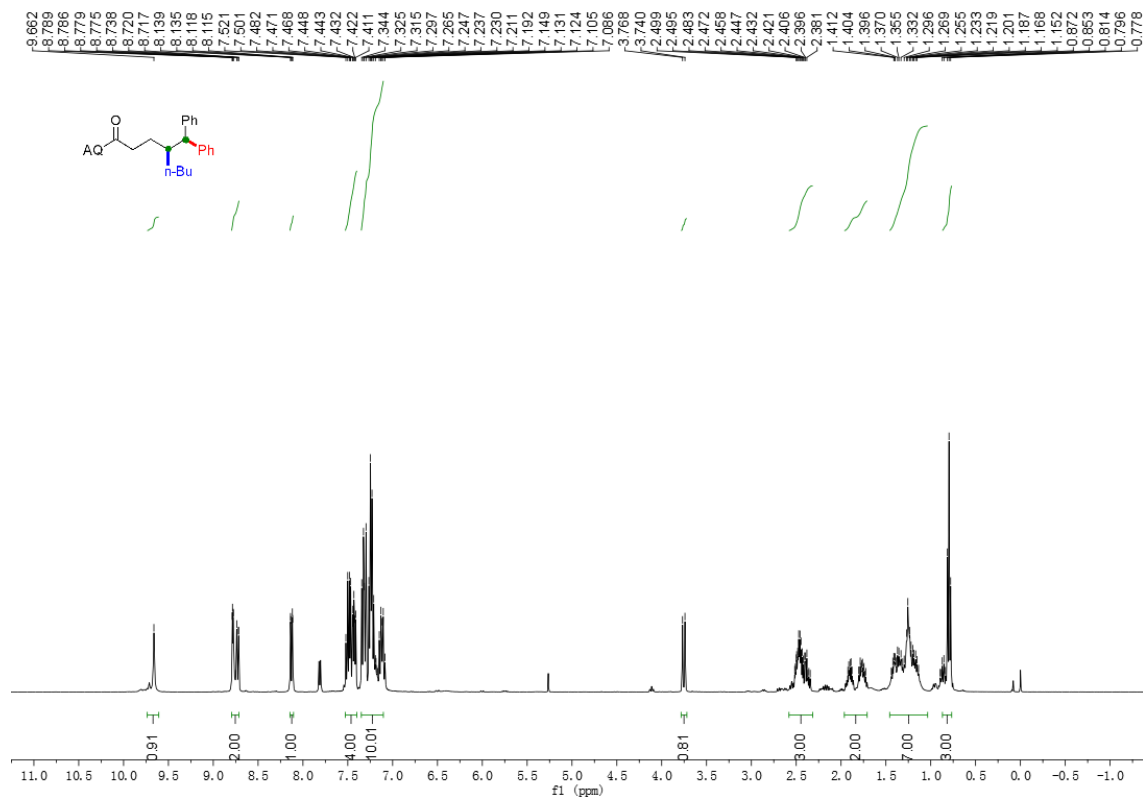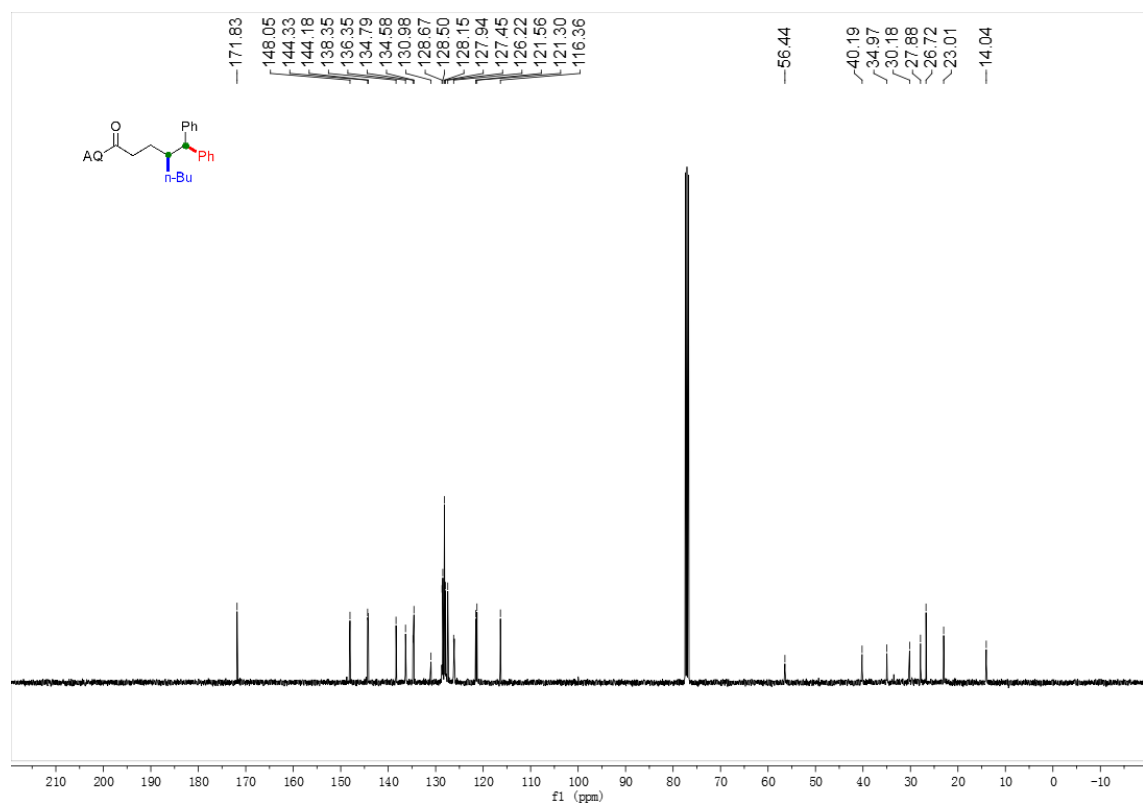

**Scheme 48.** <sup>1</sup>H NMR (400 MHz, CDCl<sub>3</sub>) and <sup>13</sup>C NMR (101 MHz, CDCl<sub>3</sub>) spectra of **2ar**

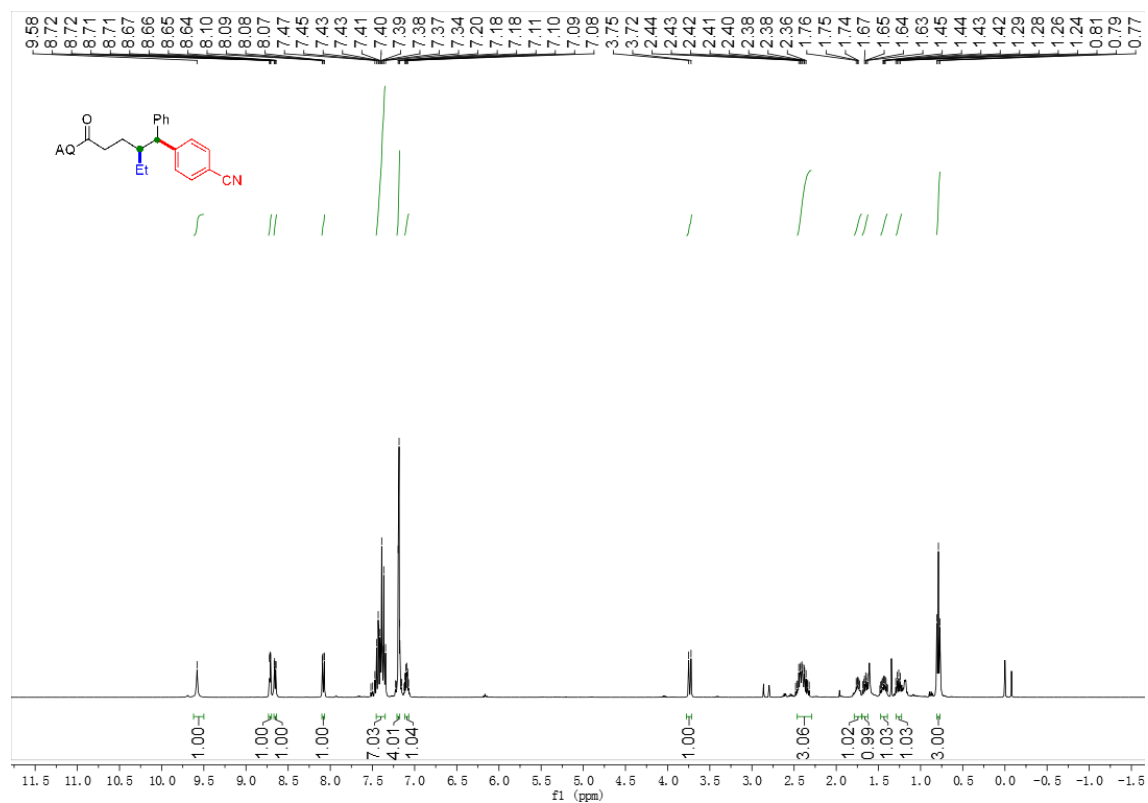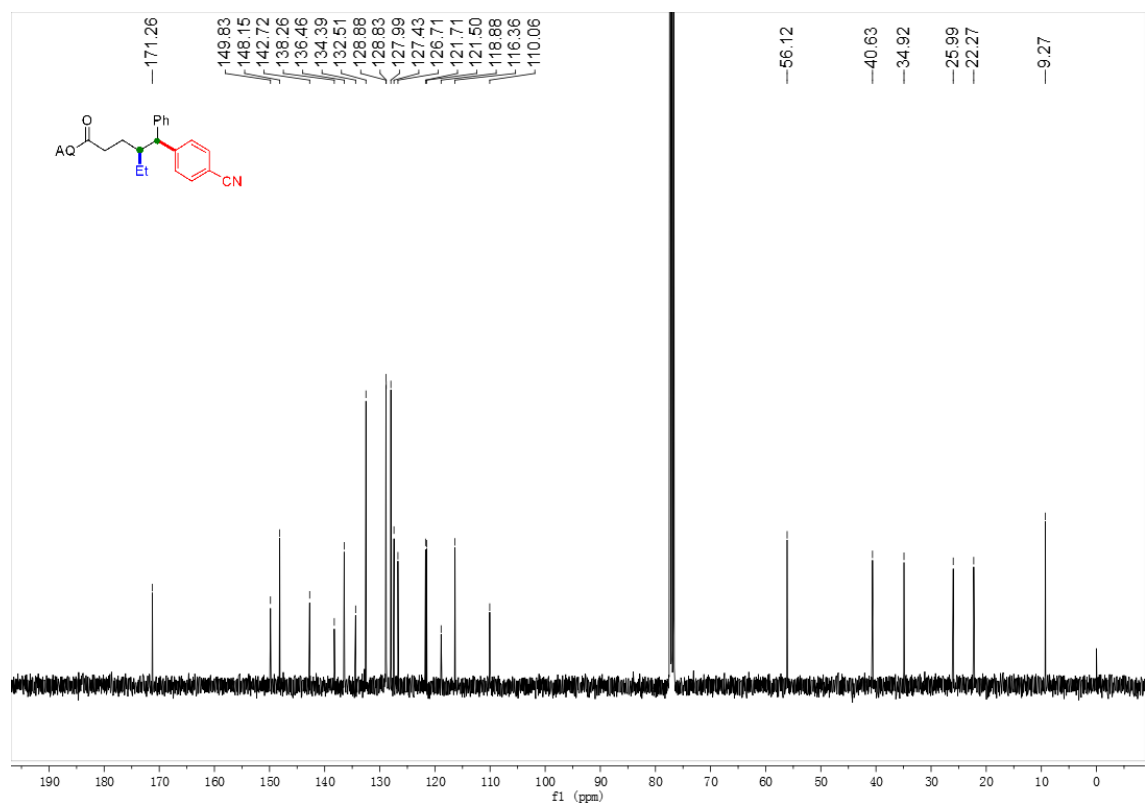

**Scheme 49.** <sup>1</sup>H NMR (400 MHz, CDCl<sub>3</sub>) and <sup>13</sup>C NMR (101 MHz, CDCl<sub>3</sub>) spectra of **2as**

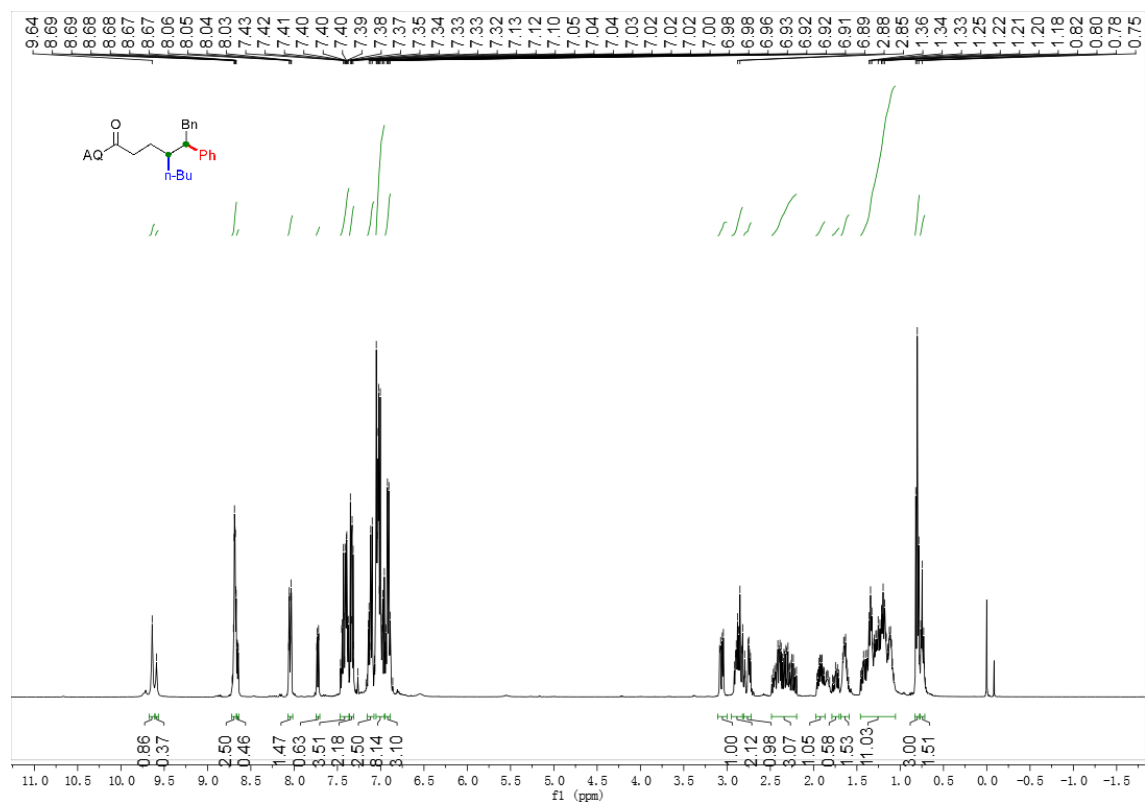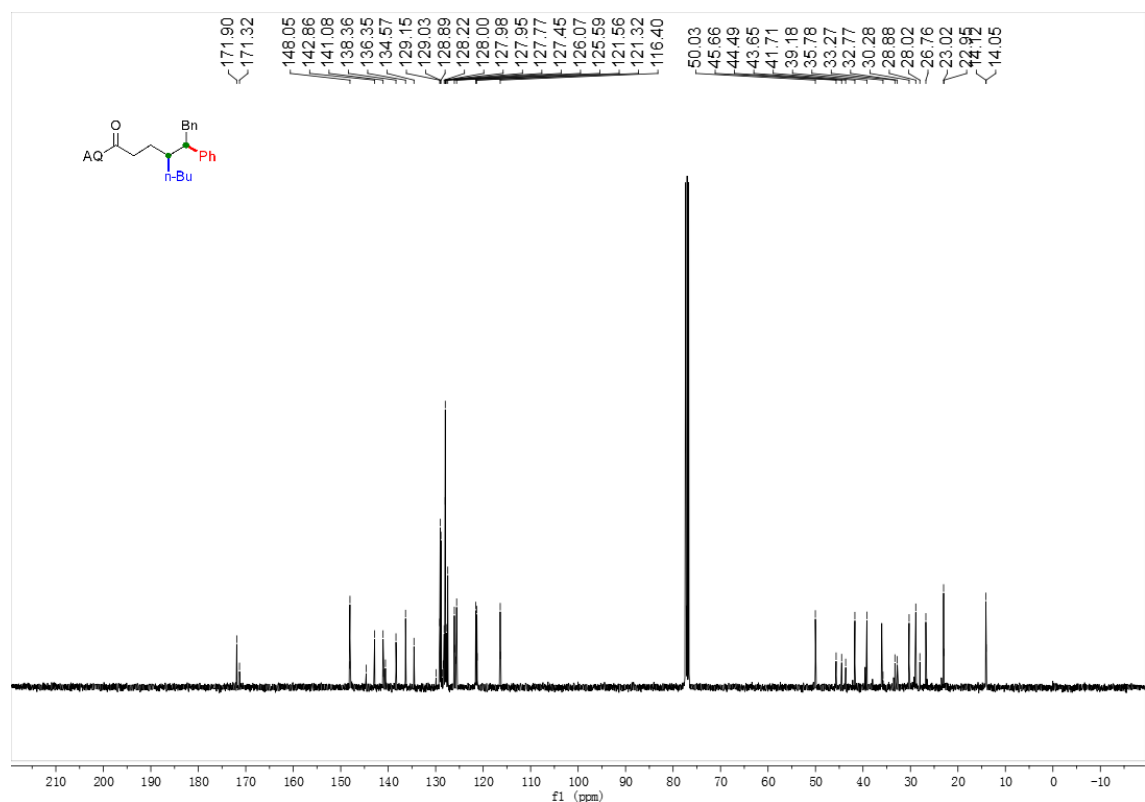

Scheme 50. <sup>1</sup>H NMR (400 MHz, CDCl<sub>3</sub>) and <sup>13</sup>C NMR (101 MHz, CDCl<sub>3</sub>) spectra off 2at

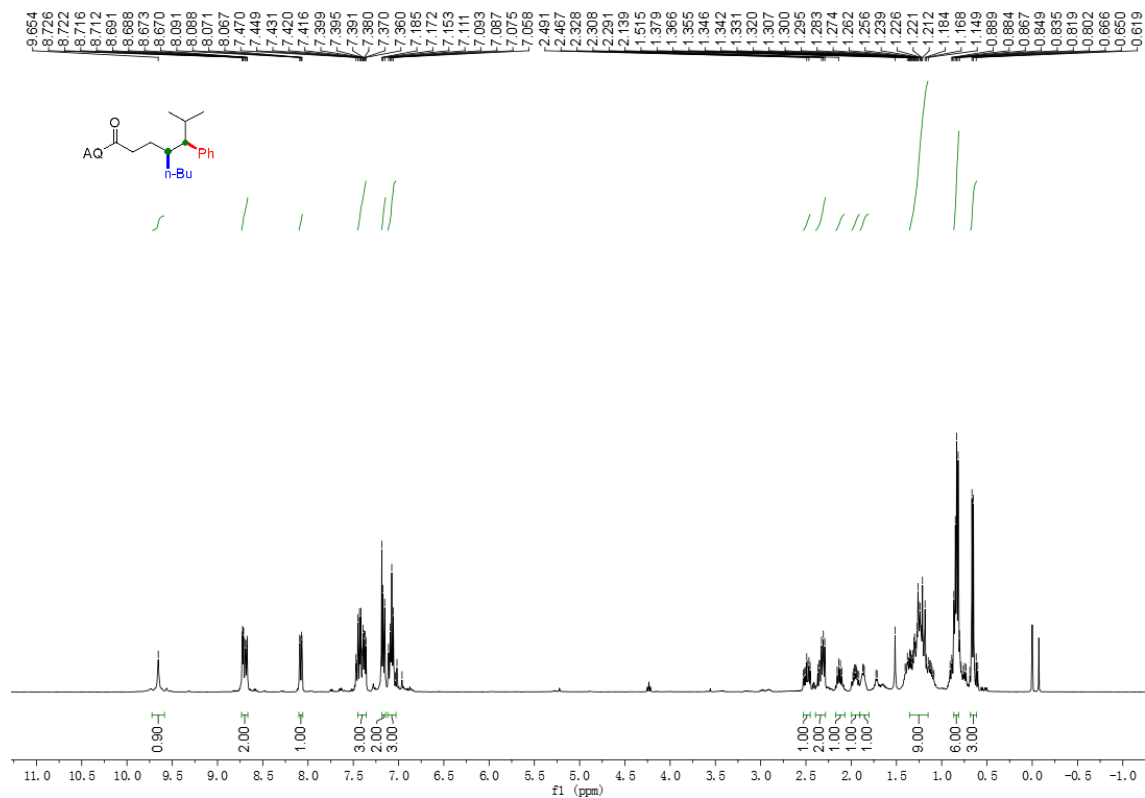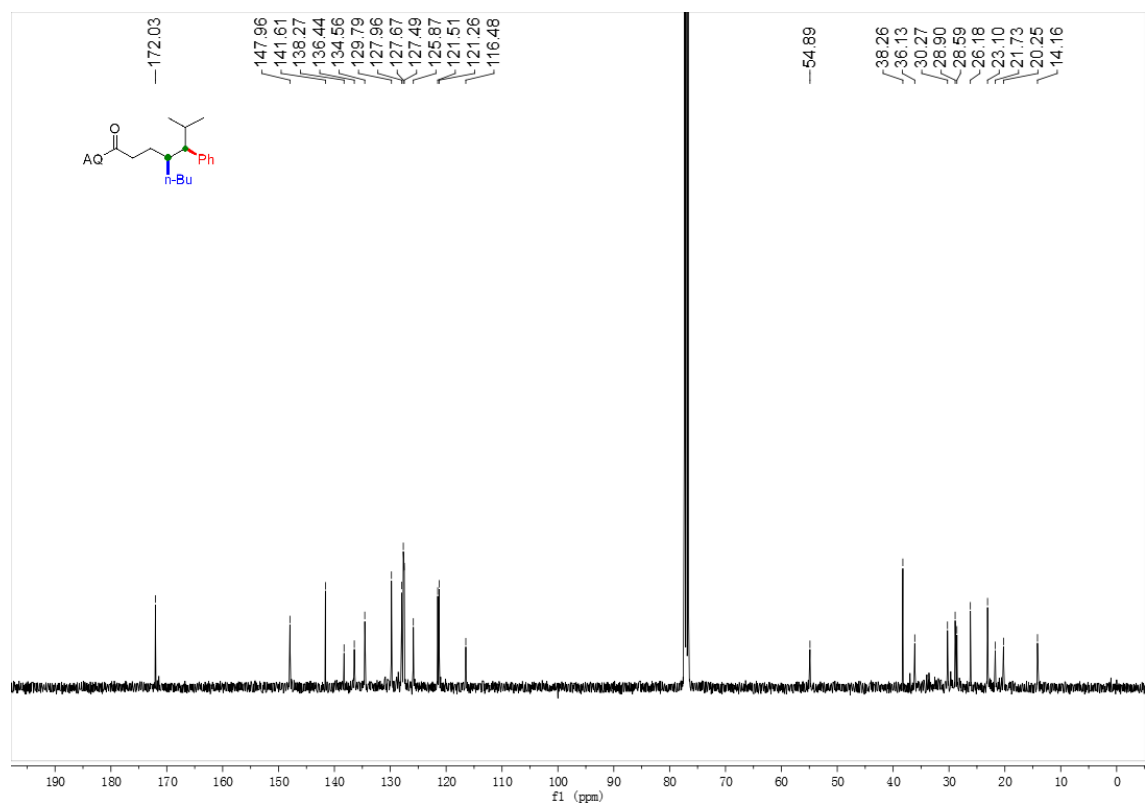

**Scheme 51.**  $^1\text{H}$  NMR (400 MHz,  $\text{CDCl}_3$ ) and  $^{13}\text{C}$  NMR (101 MHz,  $\text{CDCl}_3$ ) spectra of **2au**

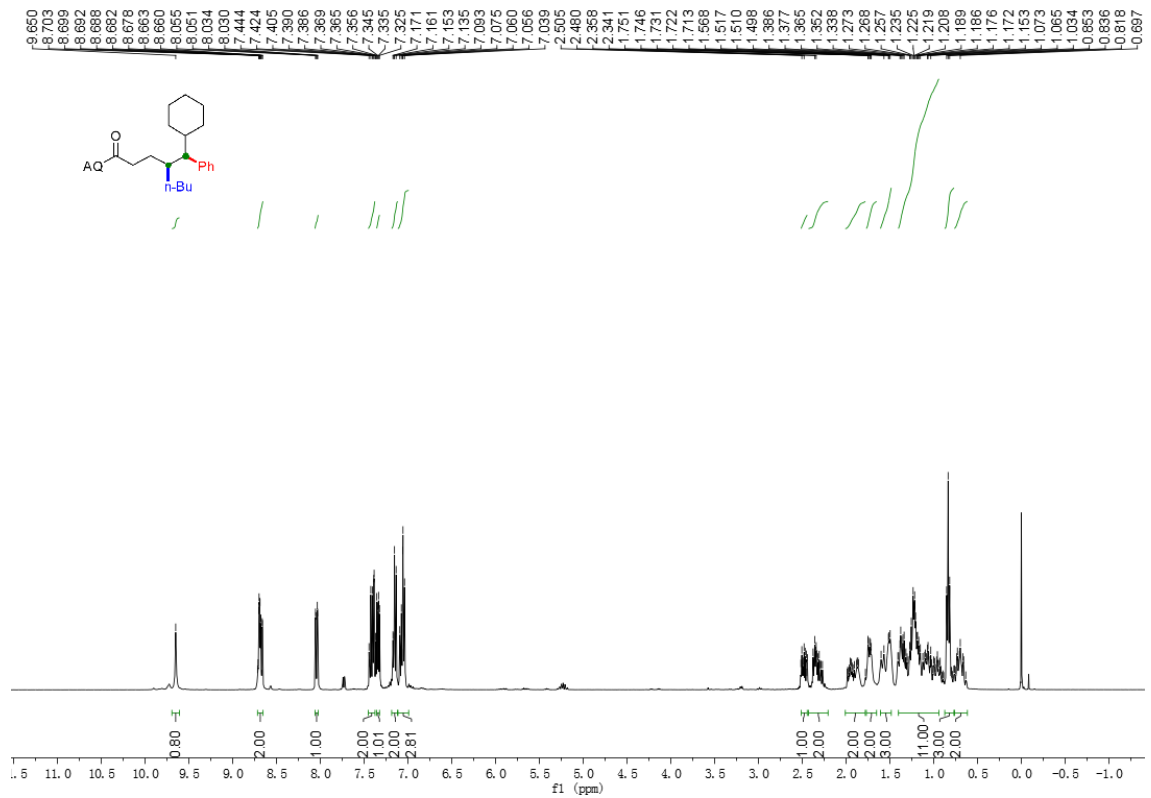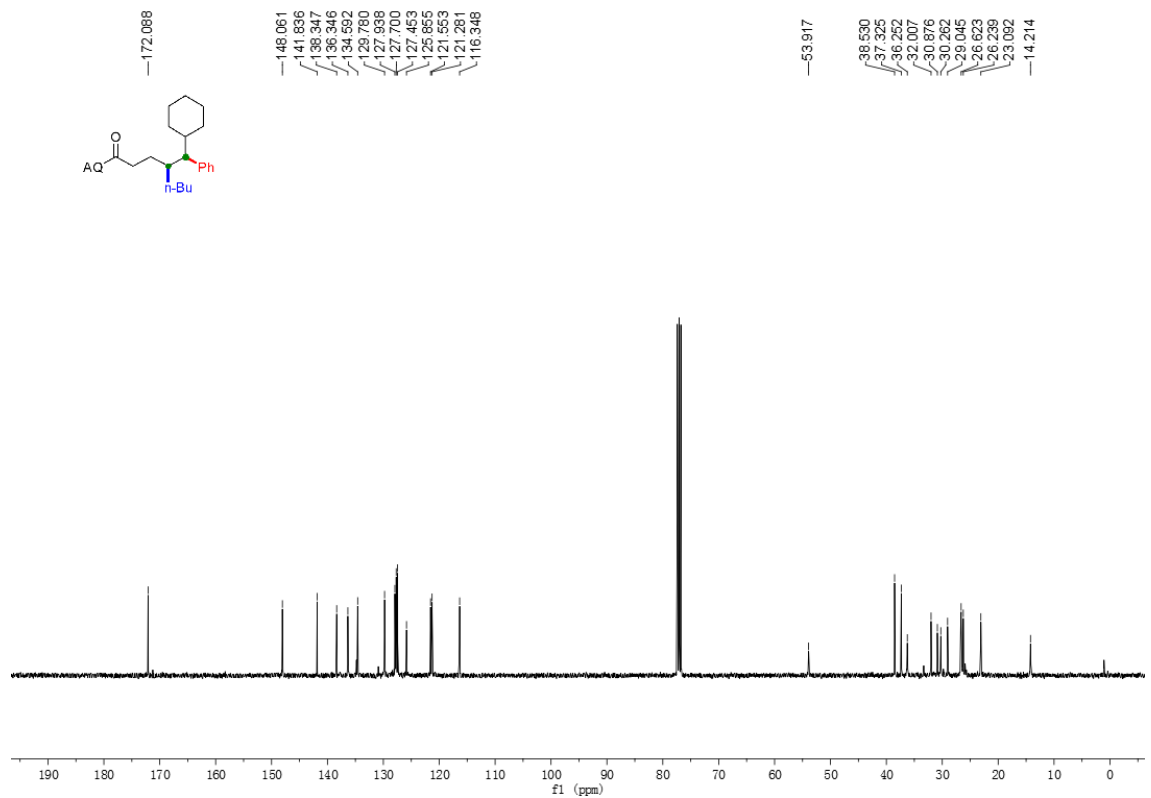

**Scheme 52.** <sup>1</sup>H NMR (400 MHz, CDCl<sub>3</sub>) and <sup>13</sup>C NMR (101 MHz, CDCl<sub>3</sub>) spectra of **2av**

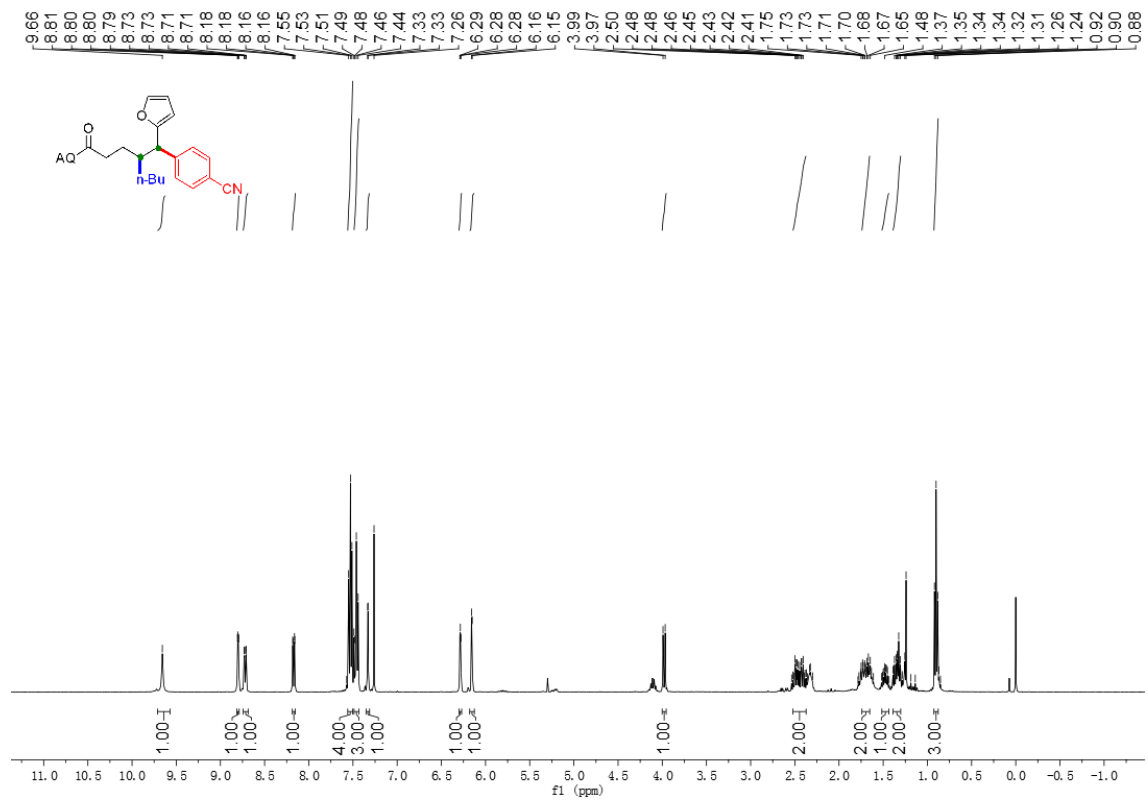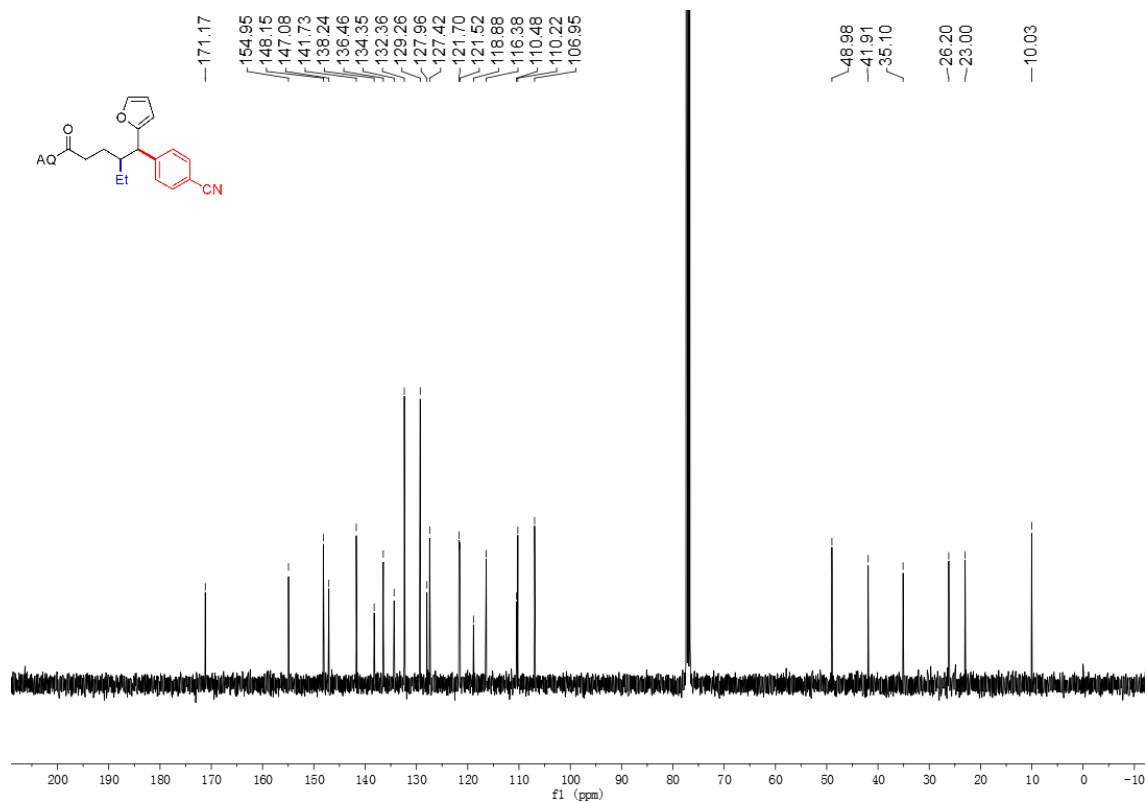

Scheme 53.  $^1\text{H}$  NMR (400 MHz,  $\text{CDCl}_3$ ) and  $^{13}\text{C}$  NMR (101 MHz,  $\text{CDCl}_3$ ) spectra of **2aw**



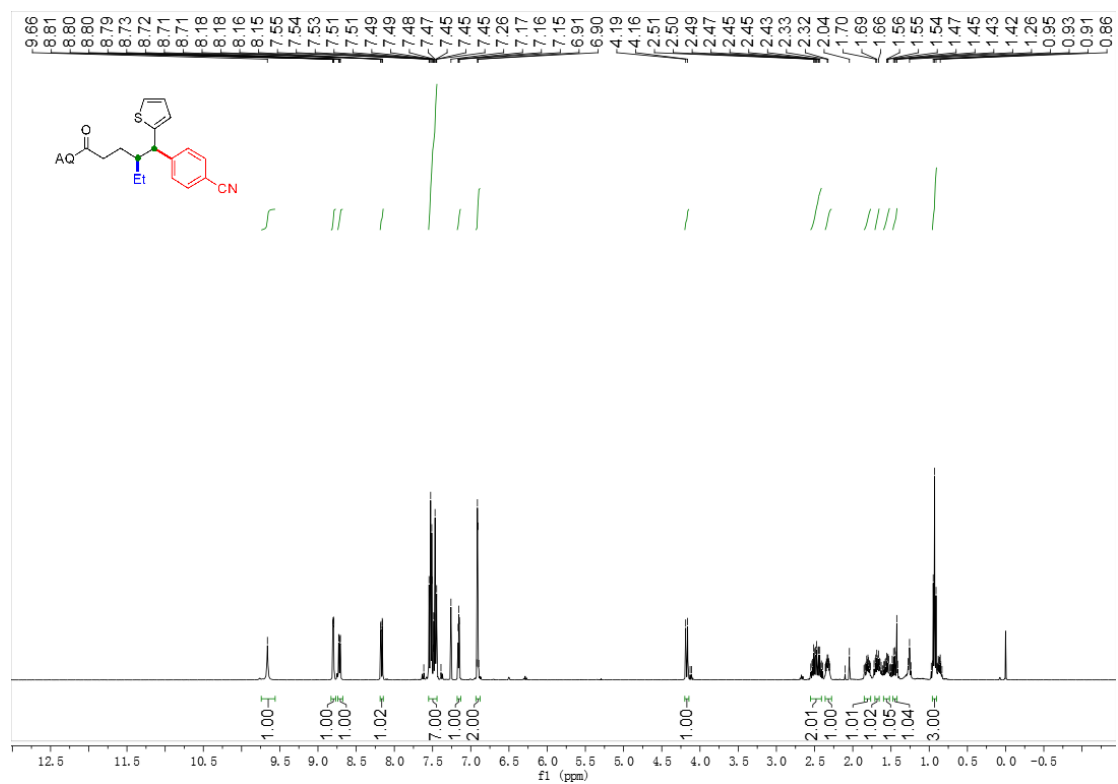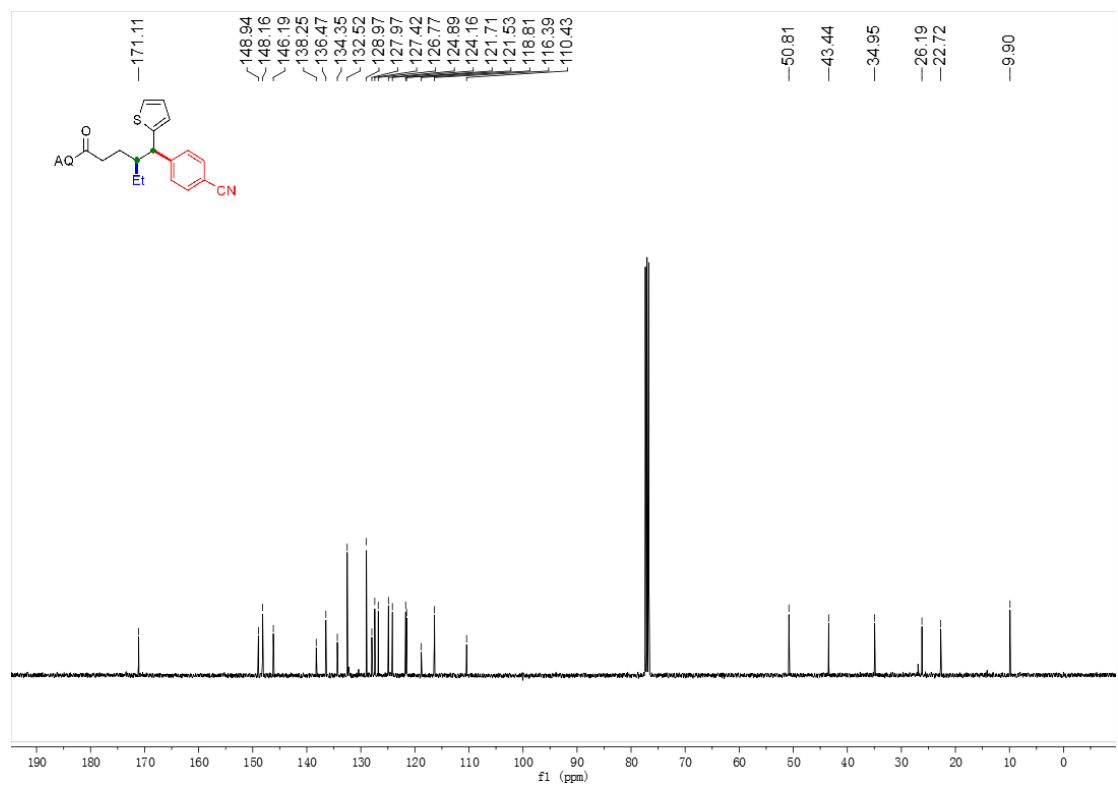

**Scheme 54.** <sup>1</sup>H NMR (400 MHz, CDCl<sub>3</sub>) and <sup>13</sup>C NMR (101 MHz, CDCl<sub>3</sub>) spectra of **2ax**

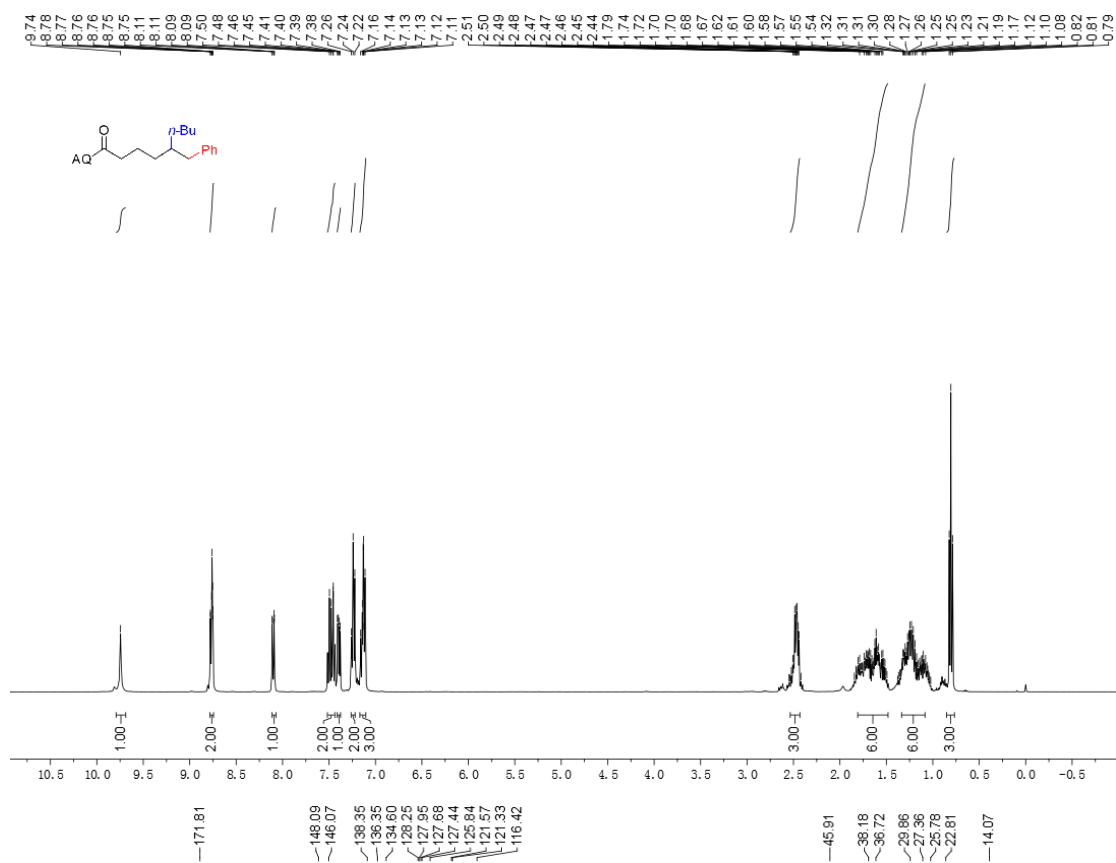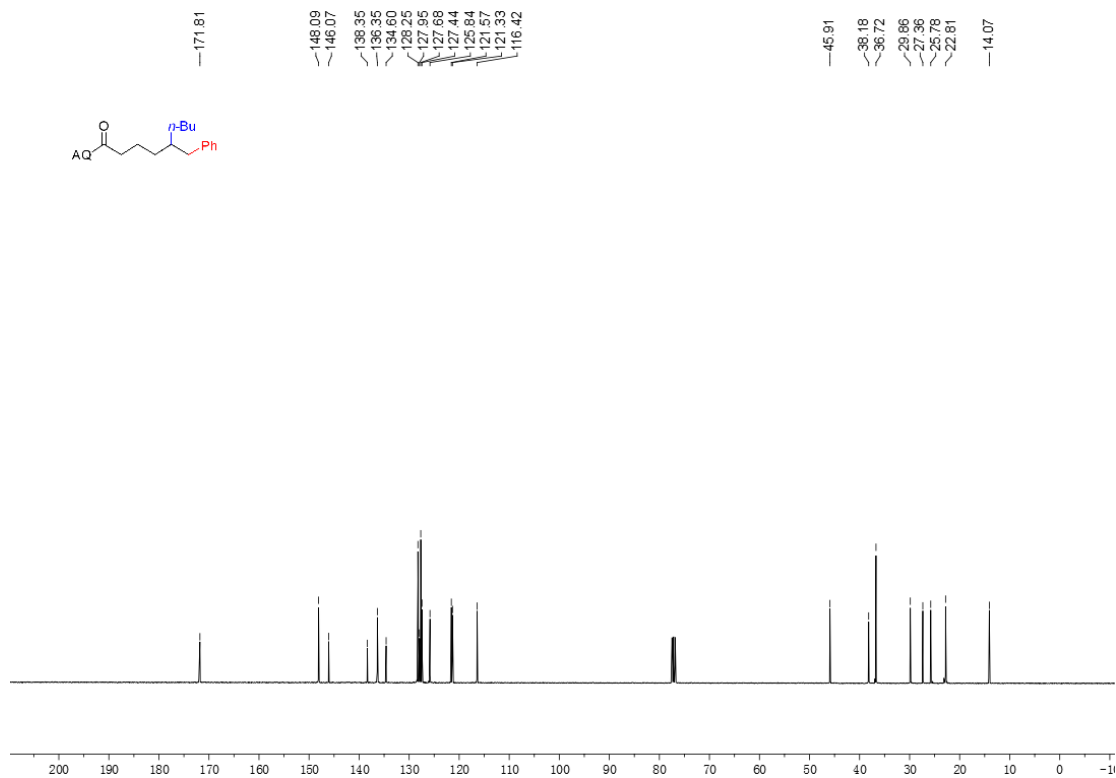

**Scheme 55.**  $^1\text{H}$  NMR (400 MHz,  $\text{CDCl}_3$ ) and  $^{13}\text{C}$  NMR (101 MHz,  $\text{CDCl}_3$ ) spectra of **2ay**

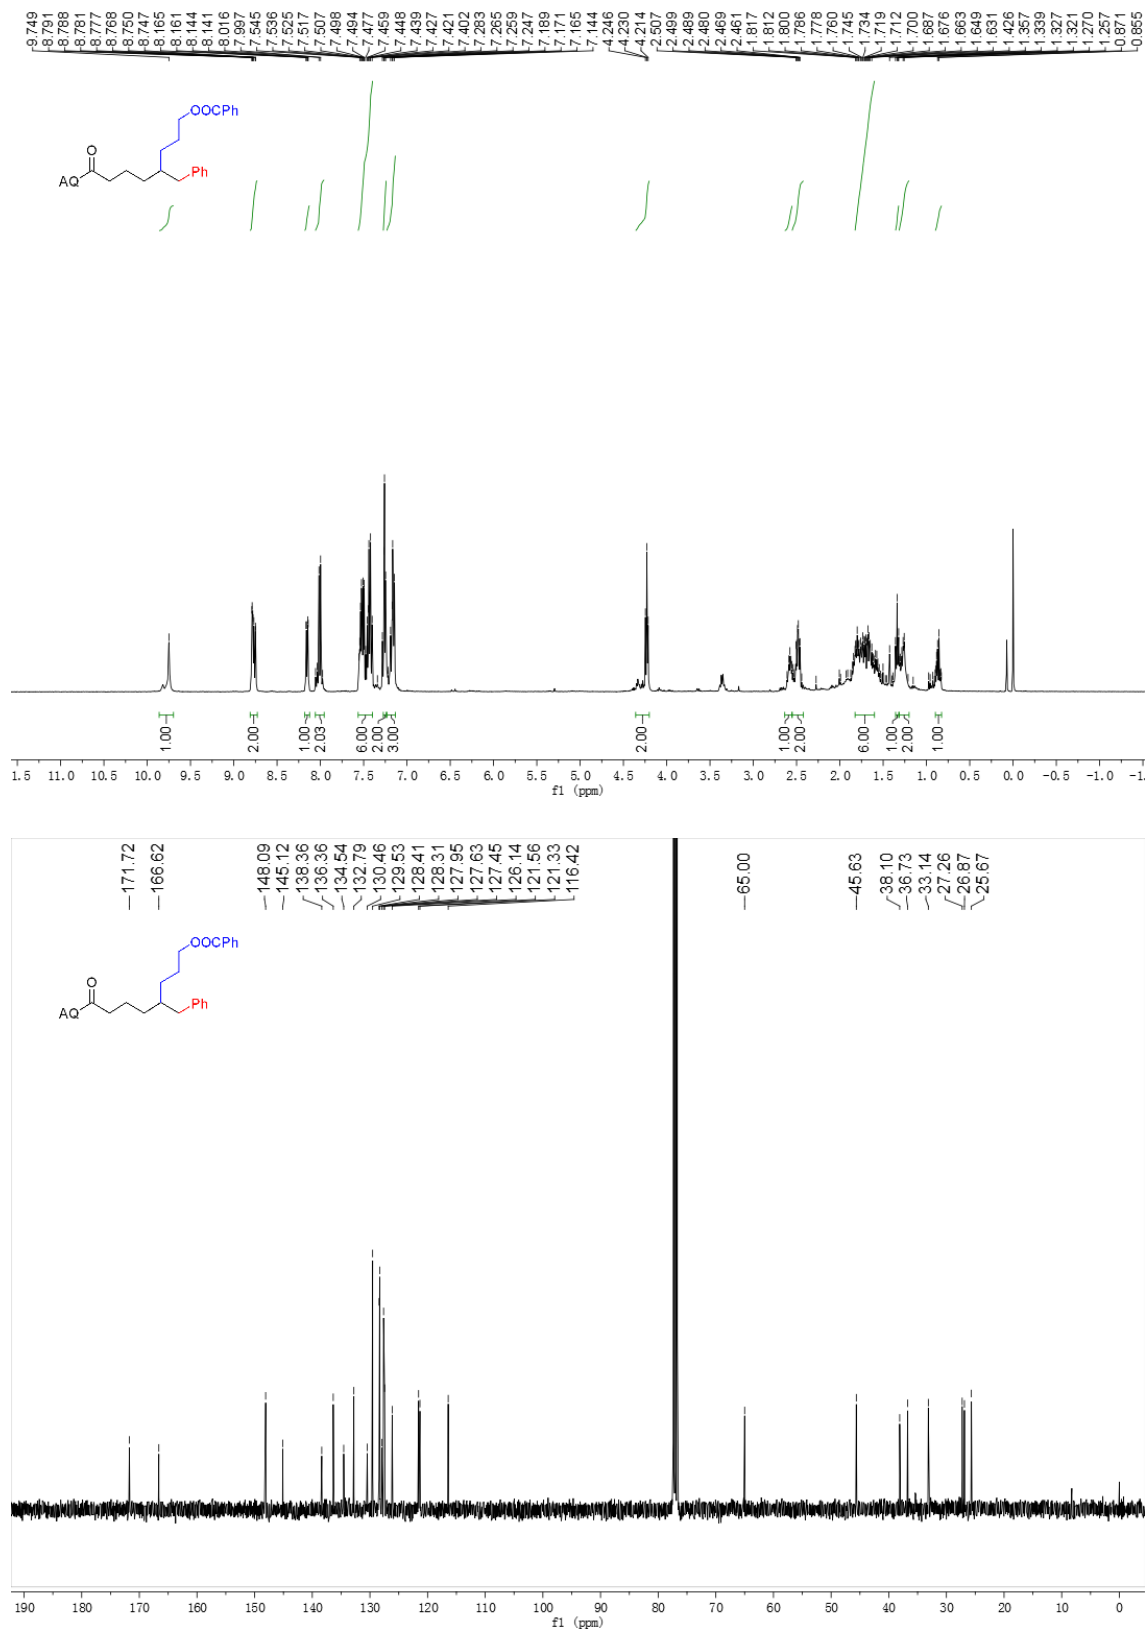

**Scheme 56.** <sup>1</sup>H NMR (400 MHz, CDCl<sub>3</sub>) and <sup>13</sup>C NMR (101 MHz, CDCl<sub>3</sub>) spectra of **2az**

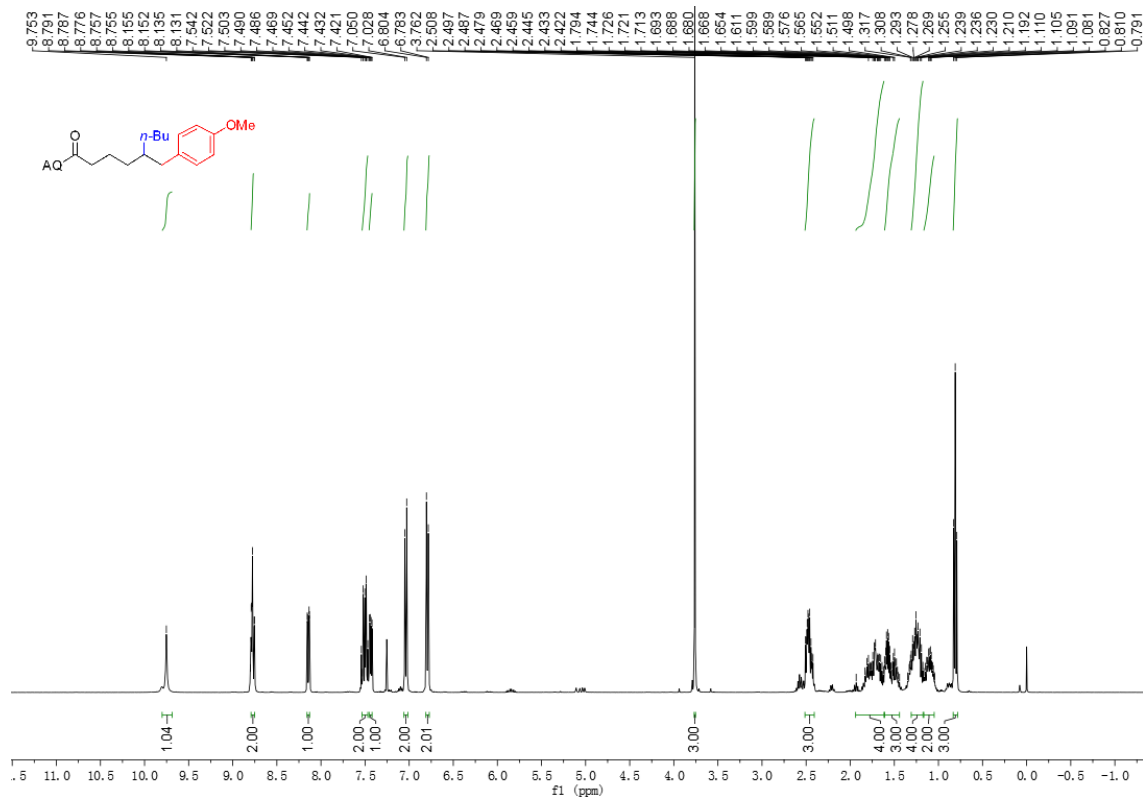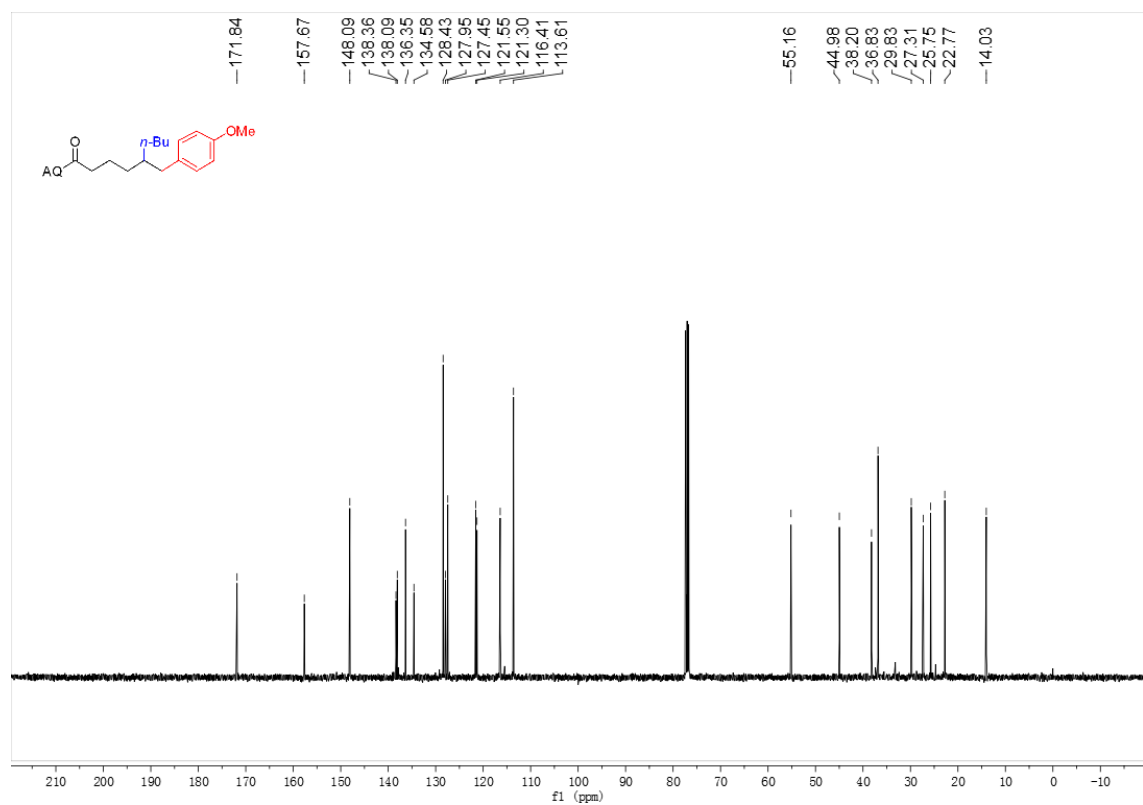

Scheme 57. <sup>1</sup>H NMR (400 MHz, CDCl<sub>3</sub>) and <sup>13</sup>C NMR (101 MHz, CDCl<sub>3</sub>) spectra of 2ba

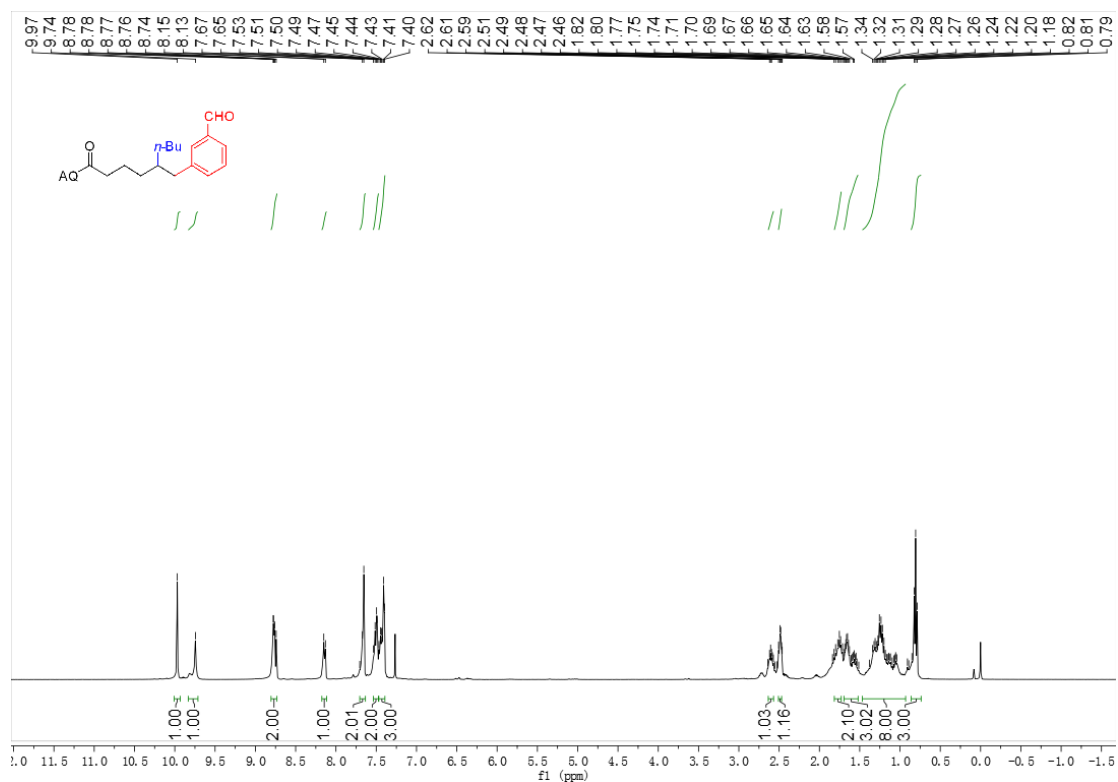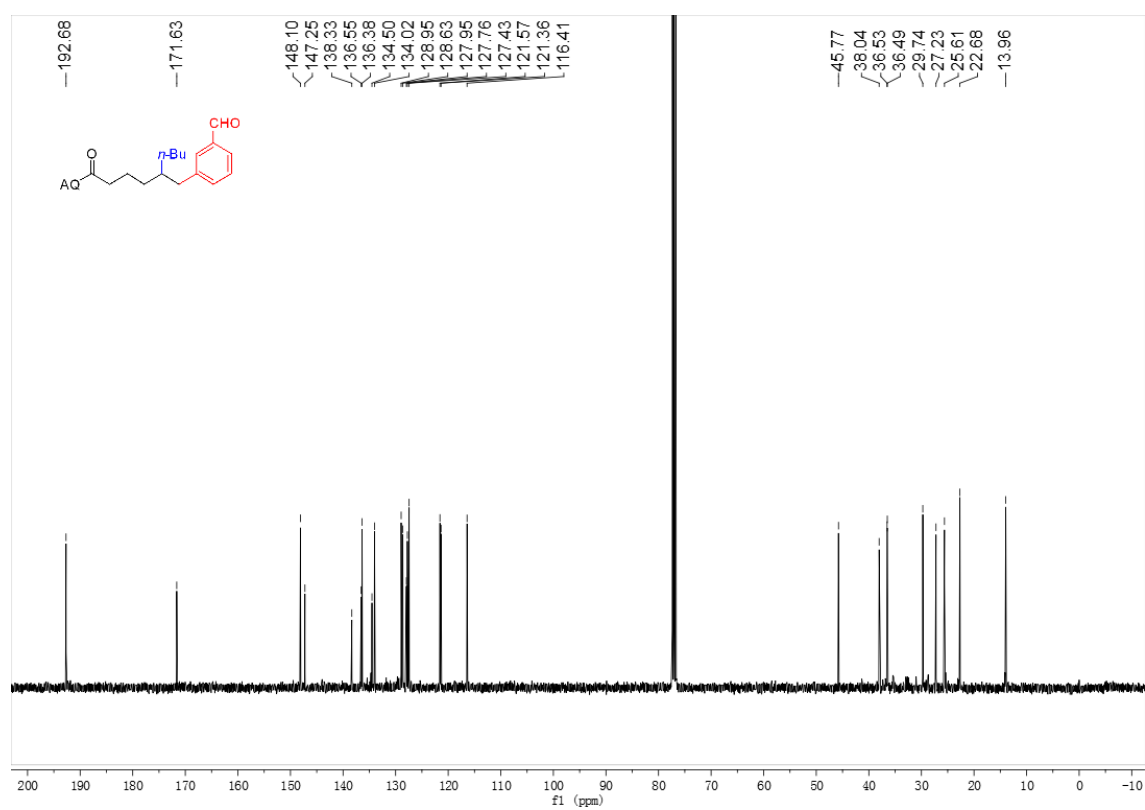

**Scheme 58.** <sup>1</sup>H NMR (400 MHz, CDCl<sub>3</sub>) and <sup>13</sup>C NMR (101 MHz, CDCl<sub>3</sub>) spectra of **2bb**

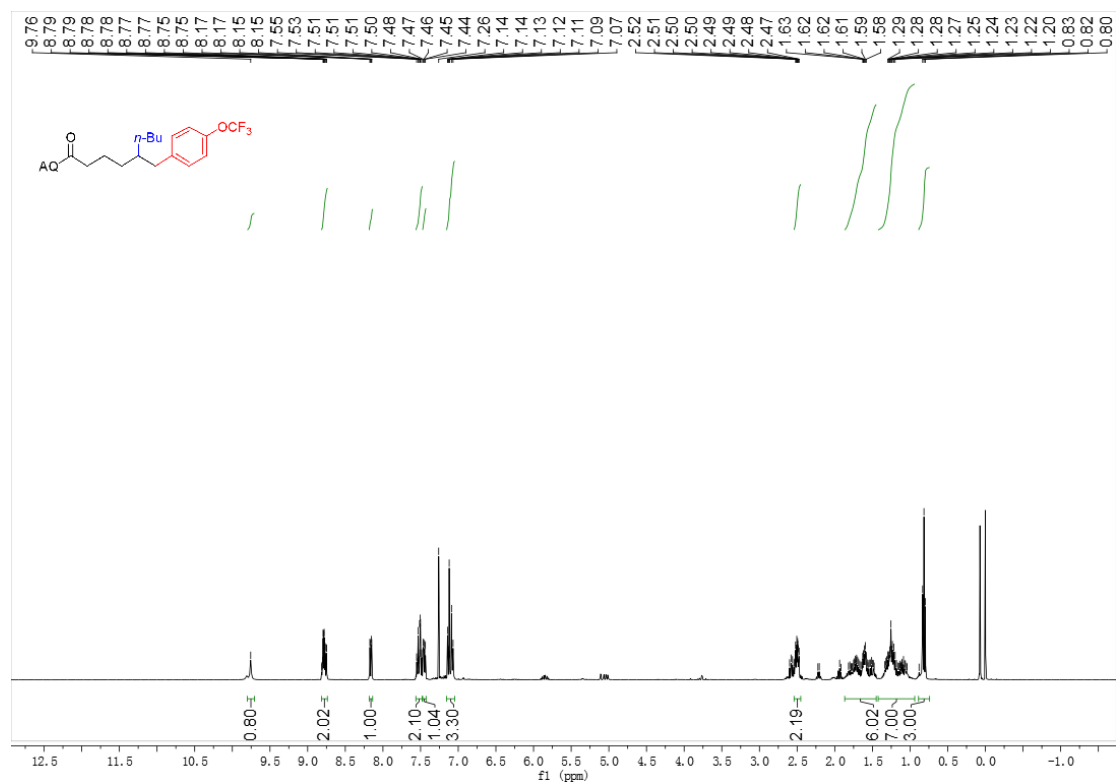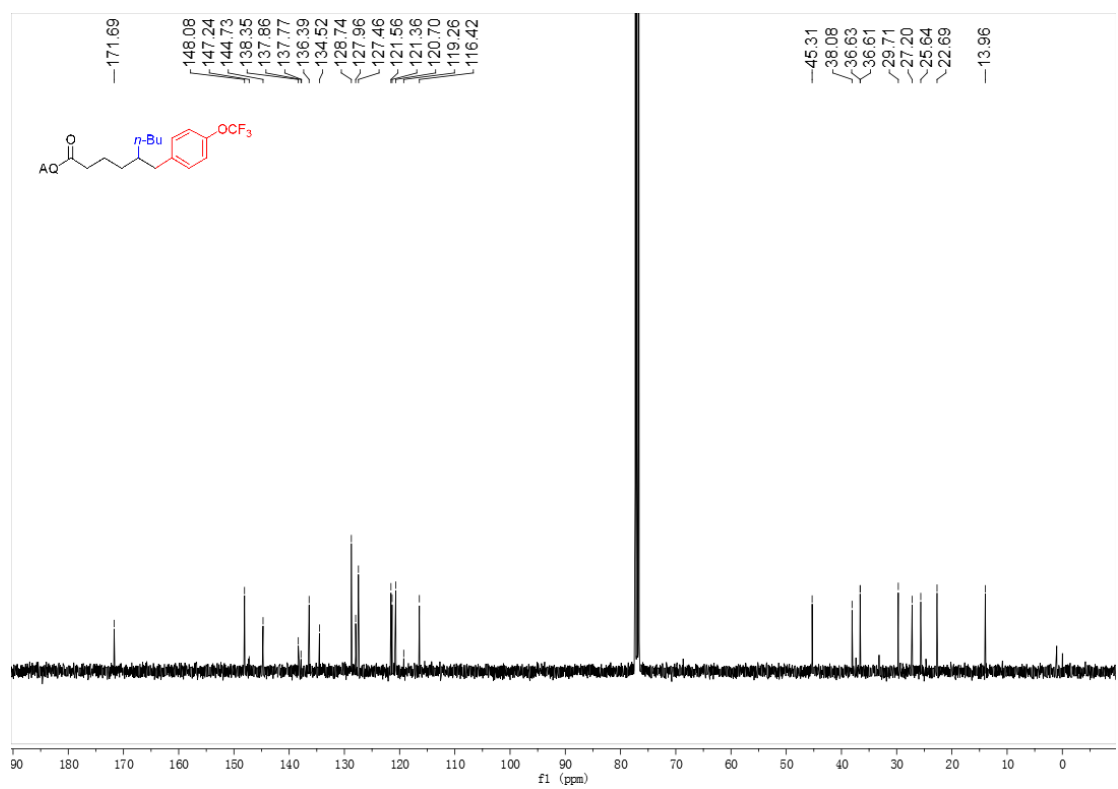

**Scheme 59.** <sup>1</sup>H NMR (400 MHz, CDCl<sub>3</sub>) and <sup>13</sup>C NMR (101 MHz, CDCl<sub>3</sub>) spectra of **2bc**

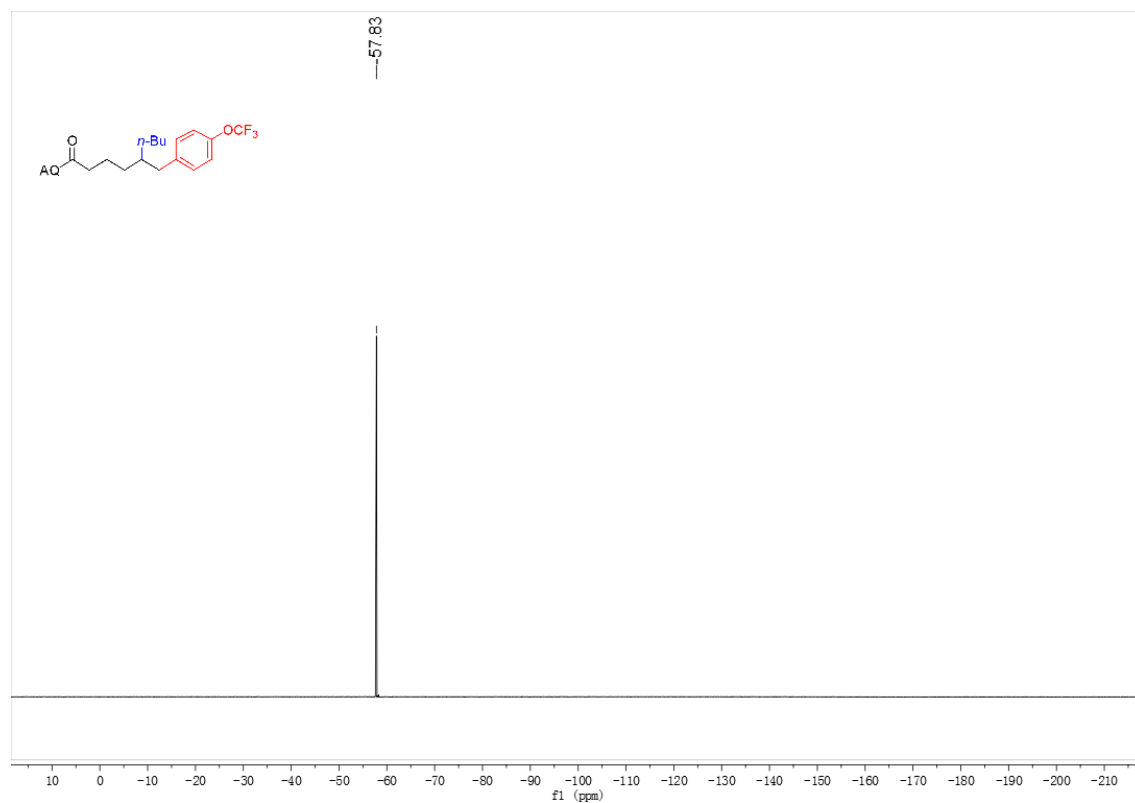

**Scheme 60.**  $^{19}\text{F}$  NMR (376 MHz,  $\text{CDCl}_3$ ) spectra of **2bc**

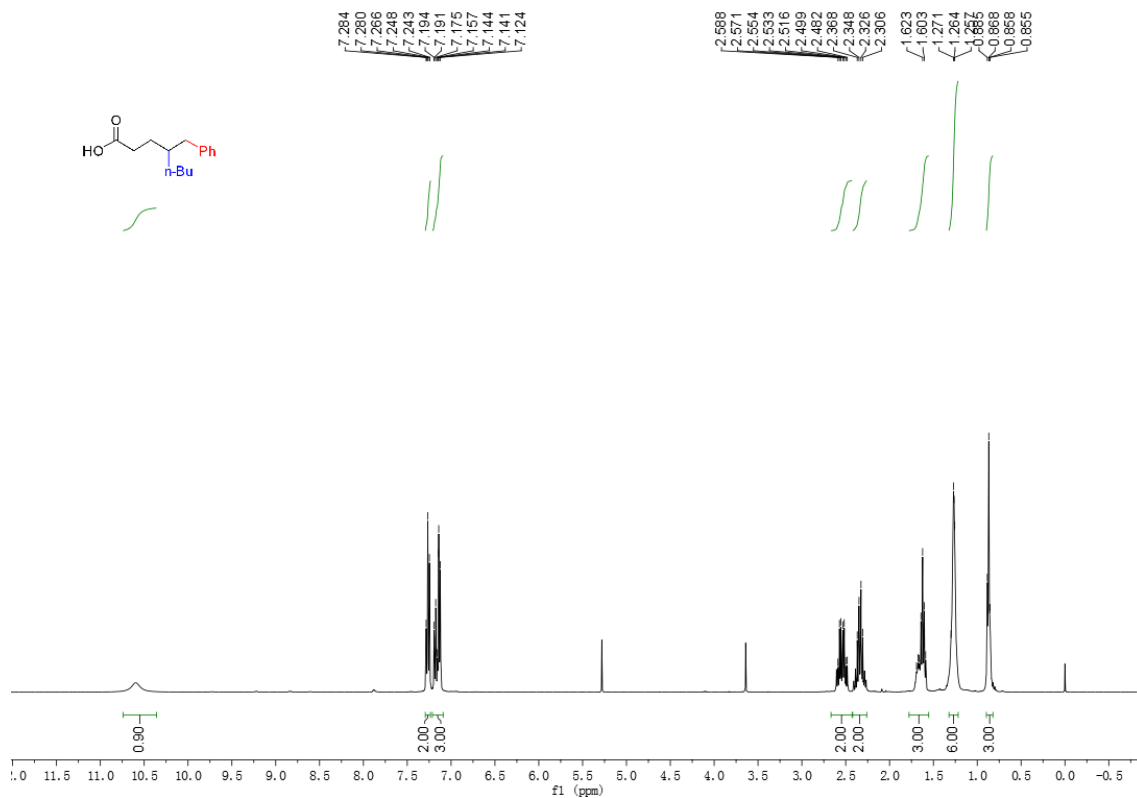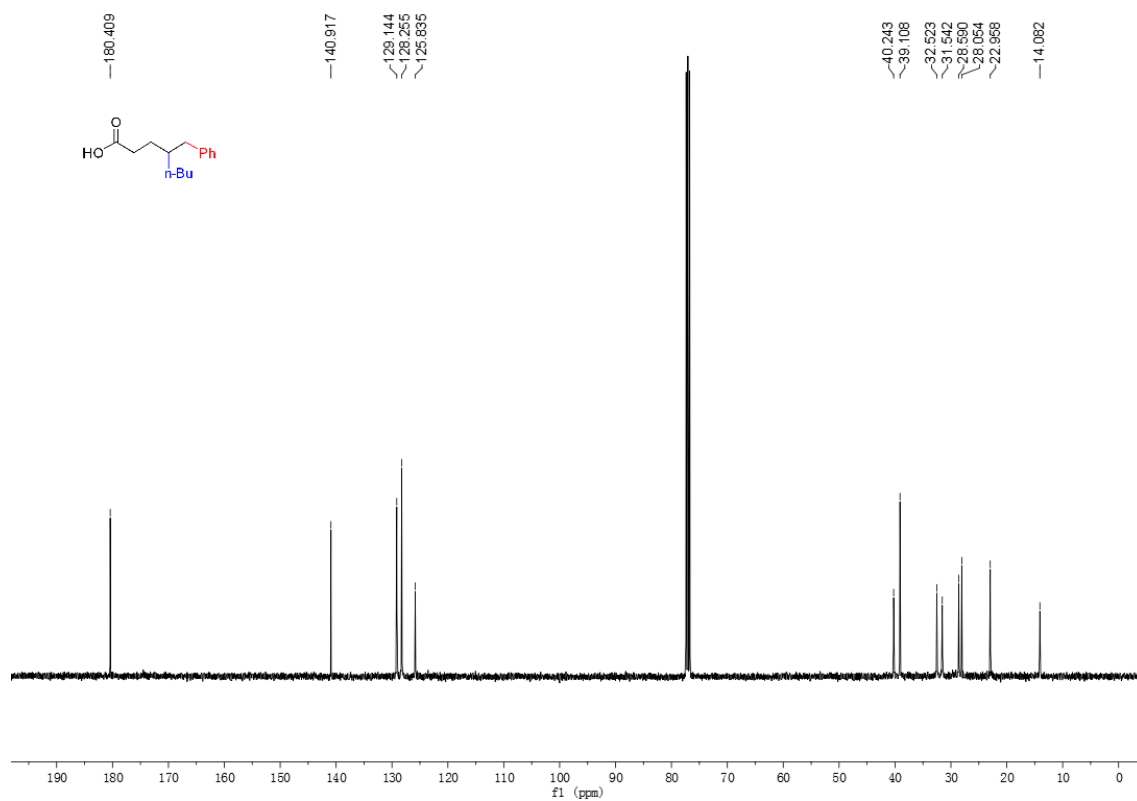

**Scheme 61.**  $^1\text{H}$  NMR (400 MHz,  $\text{CDCl}_3$ ) and  $^{13}\text{C}$  NMR (101 MHz,  $\text{CDCl}_3$ ) spectra of **3a**



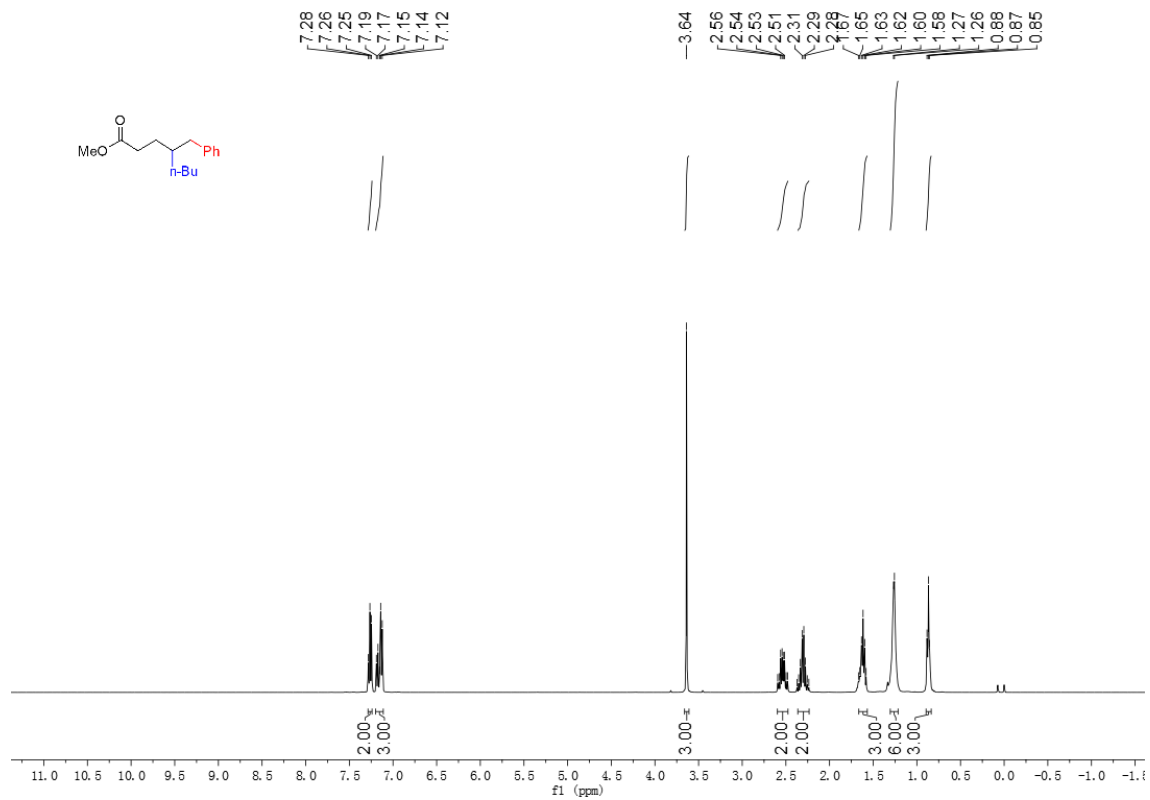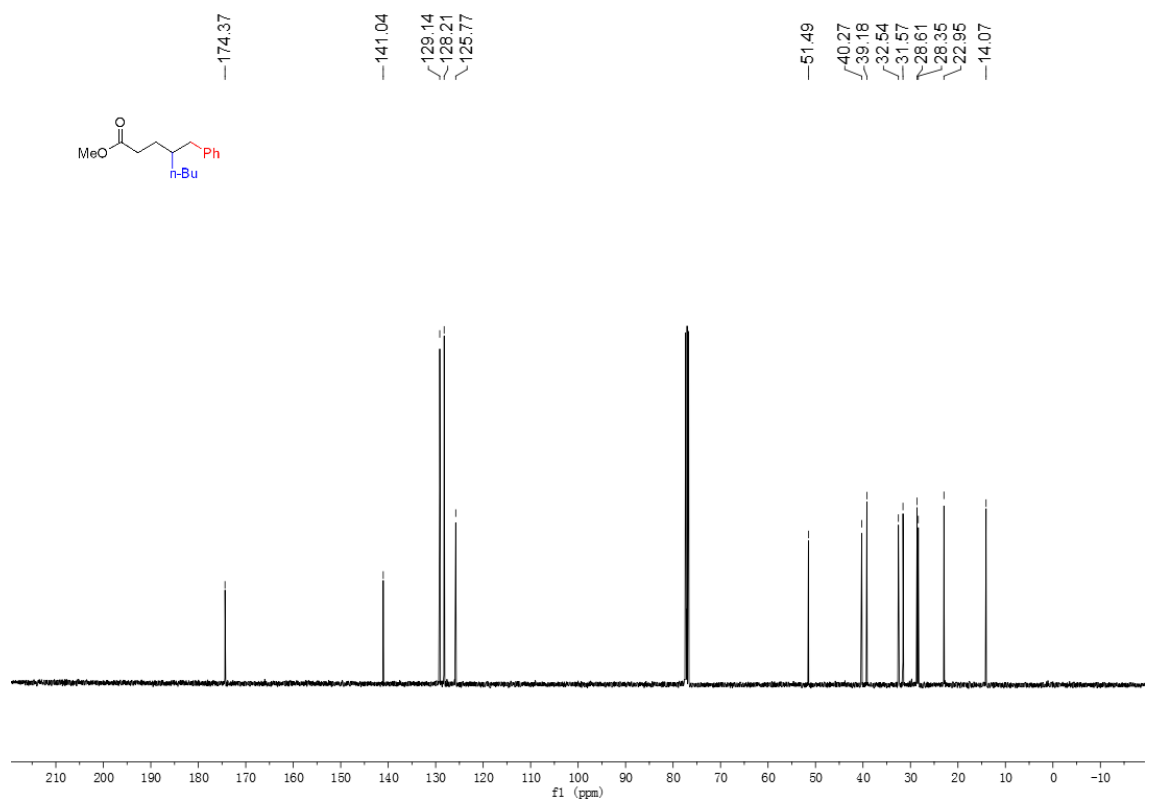

**Scheme 62.** <sup>1</sup>H NMR (400 MHz, CDCl<sub>3</sub>) and <sup>13</sup>C NMR (101 MHz, CDCl<sub>3</sub>) spectra of **3b**

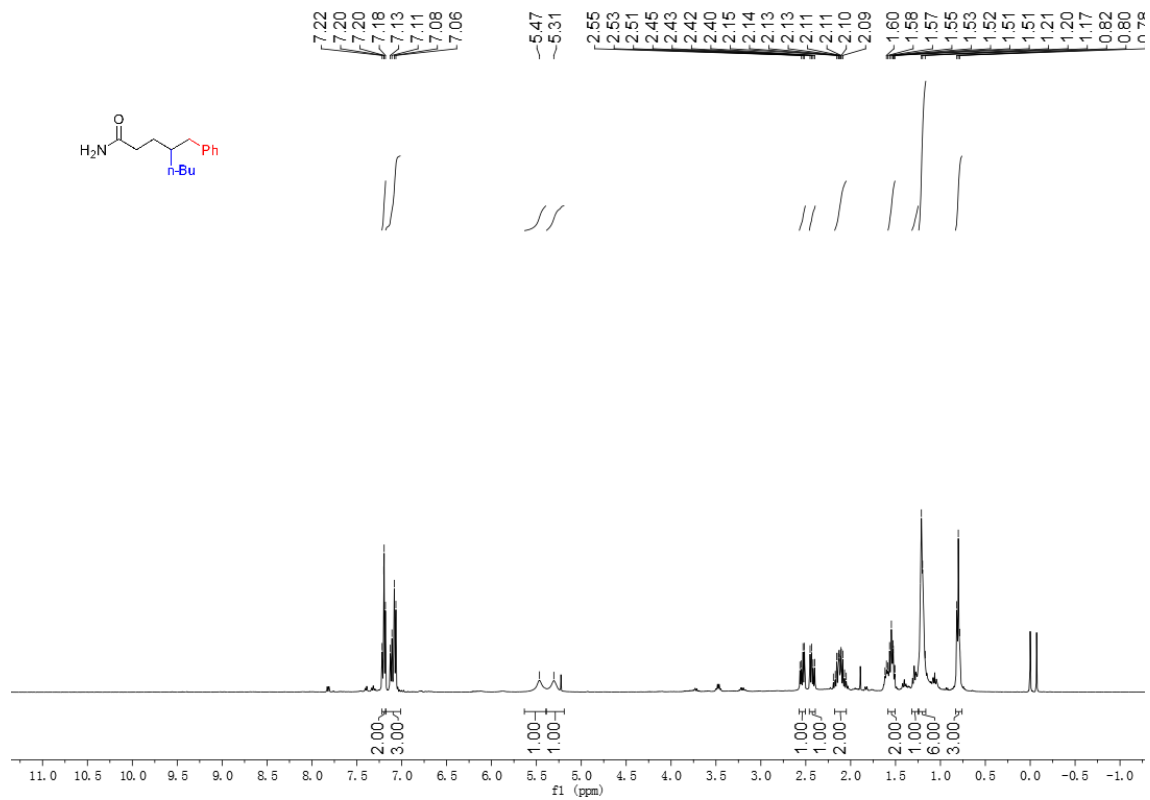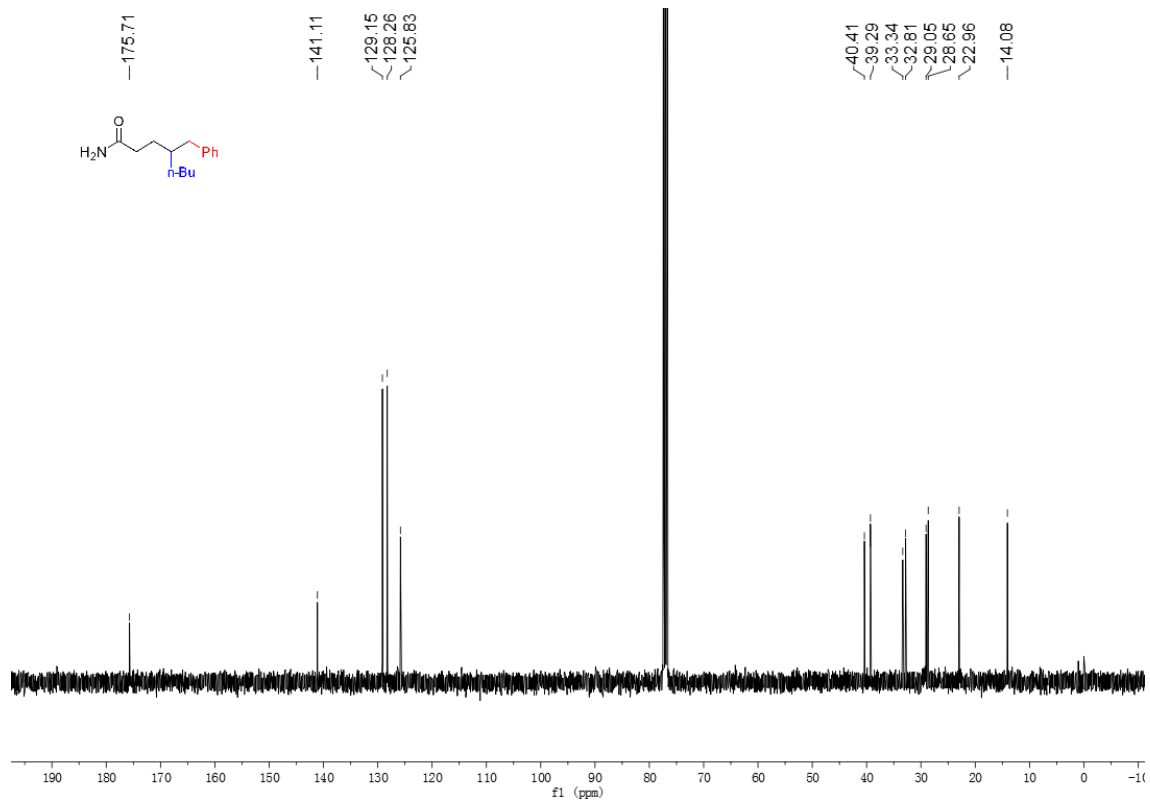

**Scheme 63.** <sup>1</sup>H NMR (400 MHz, CDCl<sub>3</sub>) and <sup>13</sup>C NMR(101 MHz, CDCl<sub>3</sub>) spectra of **3c**

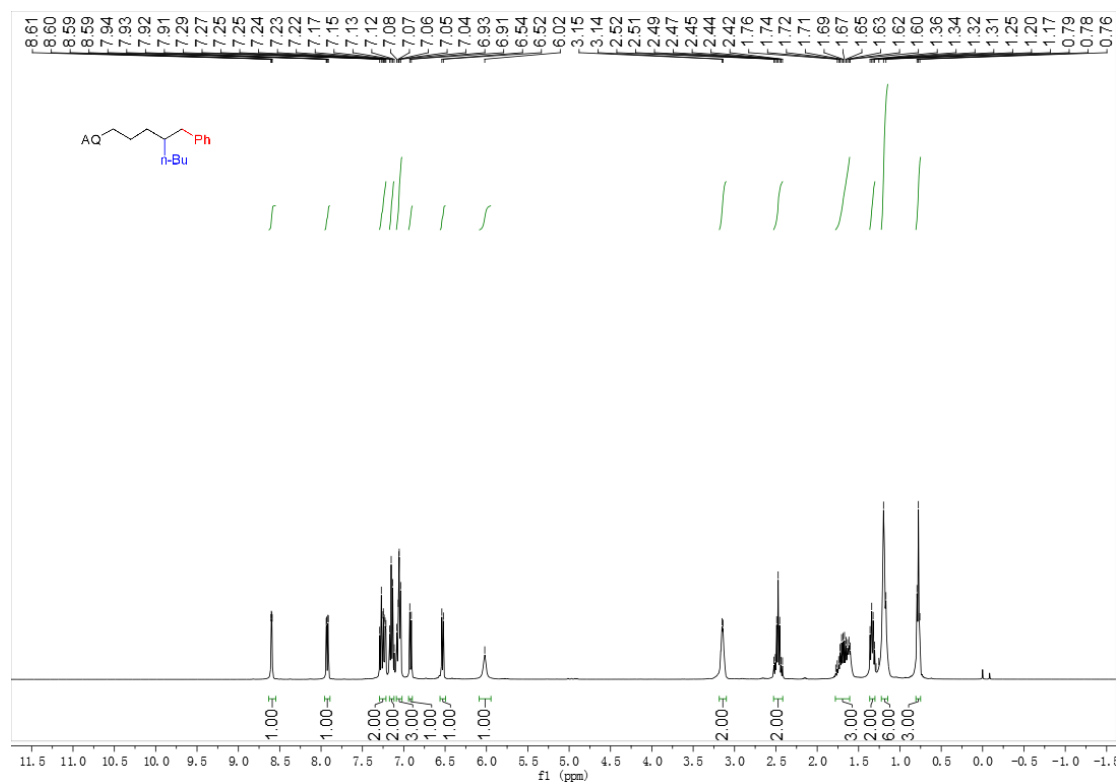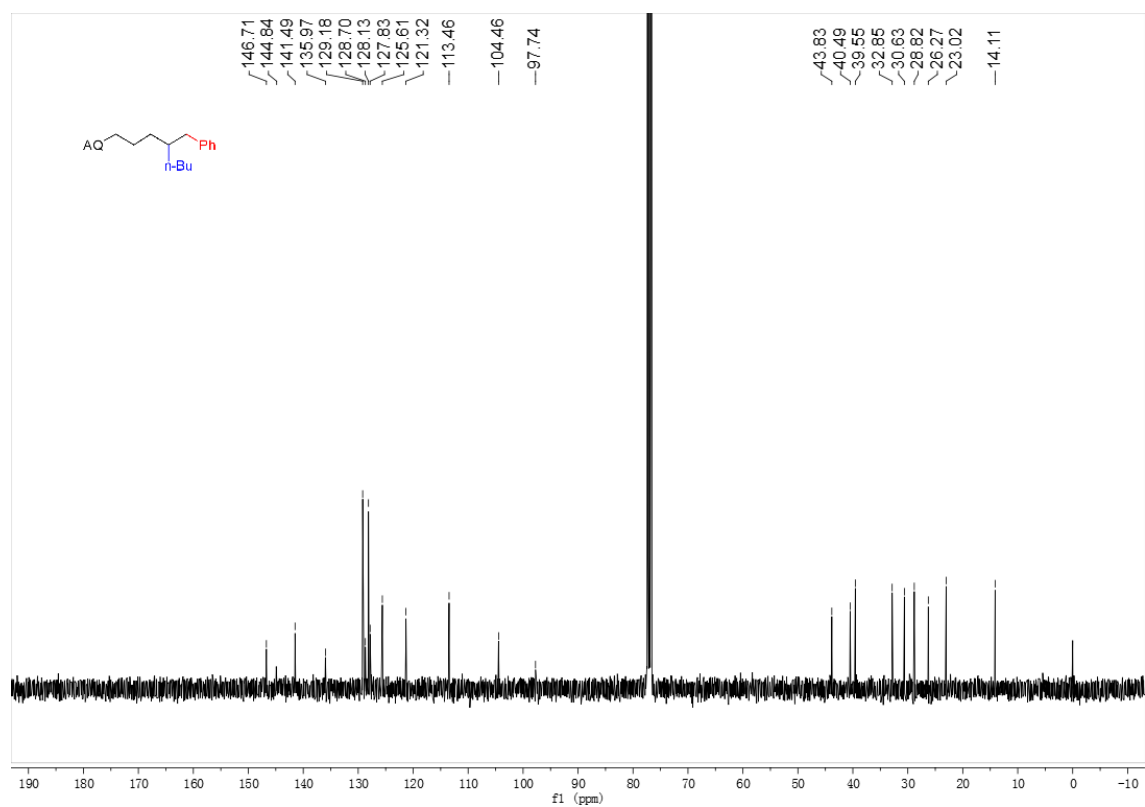

**Scheme 64.** <sup>1</sup>H NMR (400 MHz, CDCl<sub>3</sub>) and <sup>13</sup>C NMR (101 MHz, CDCl<sub>3</sub>) spectra of **3d**

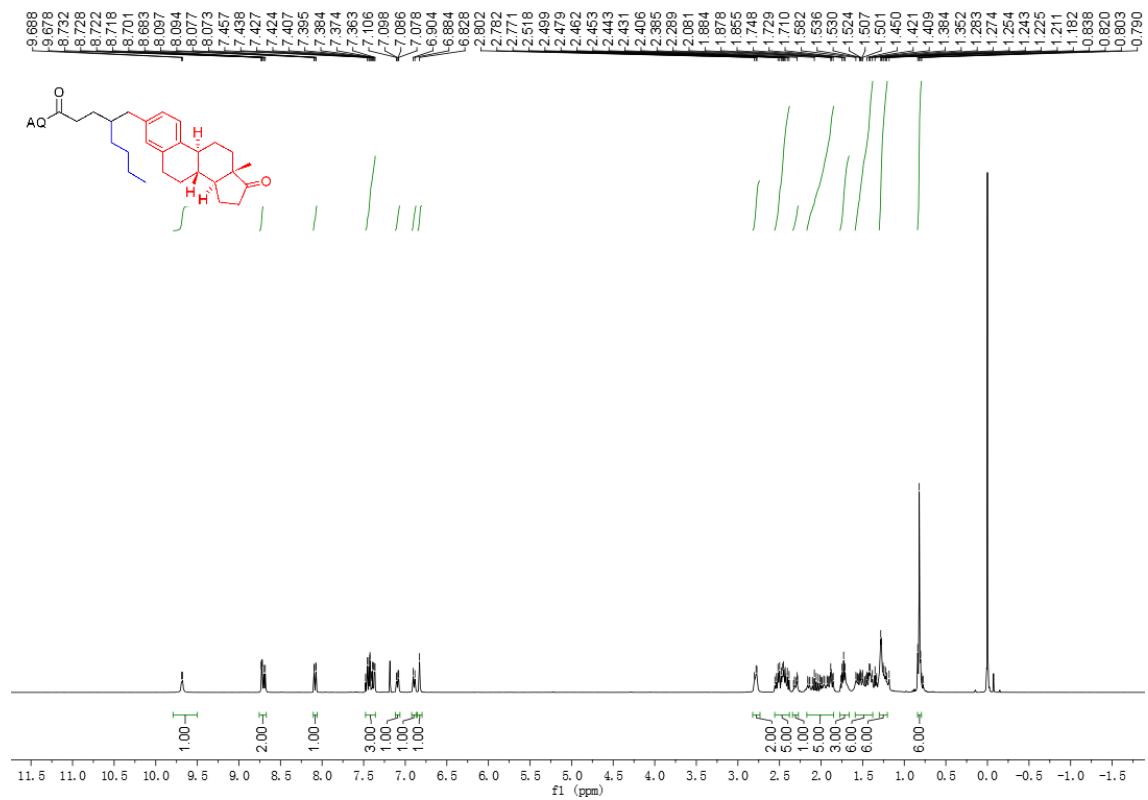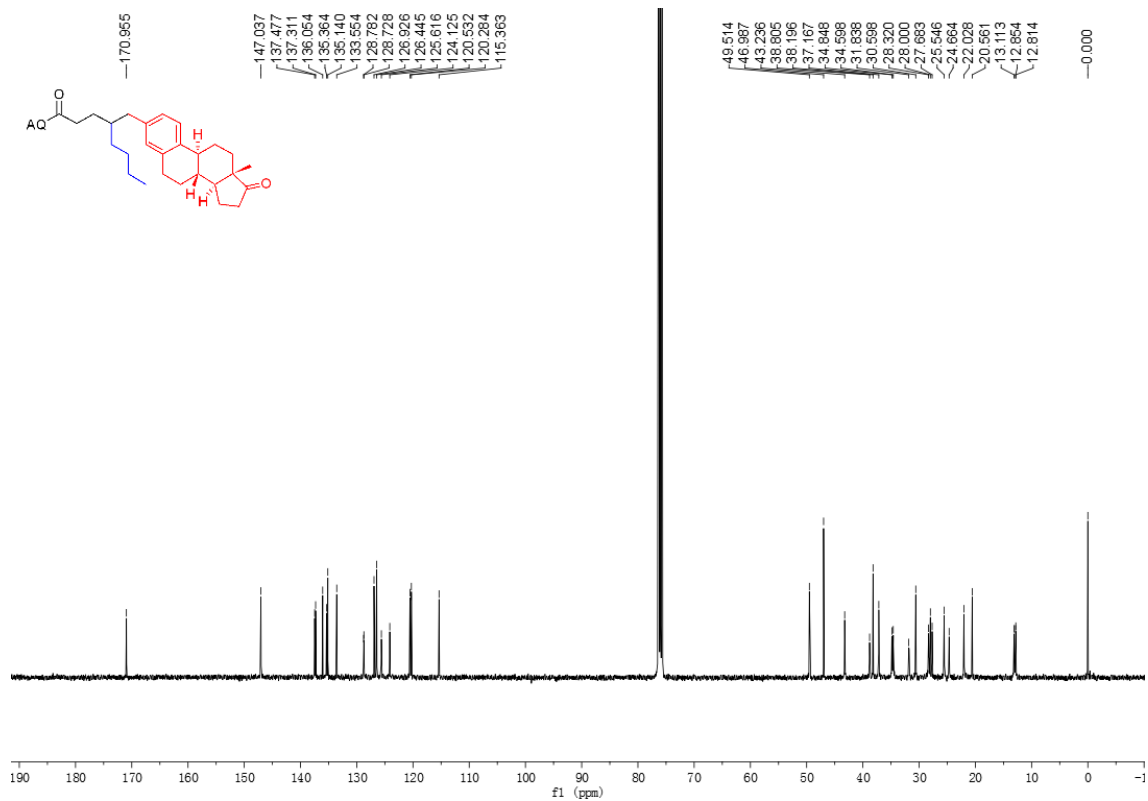

**Scheme 65.** <sup>1</sup>H NMR (400 MHz, CDCl<sub>3</sub>) and <sup>13</sup>C NMR (101 MHz, CDCl<sub>3</sub>) spectra of **4a**



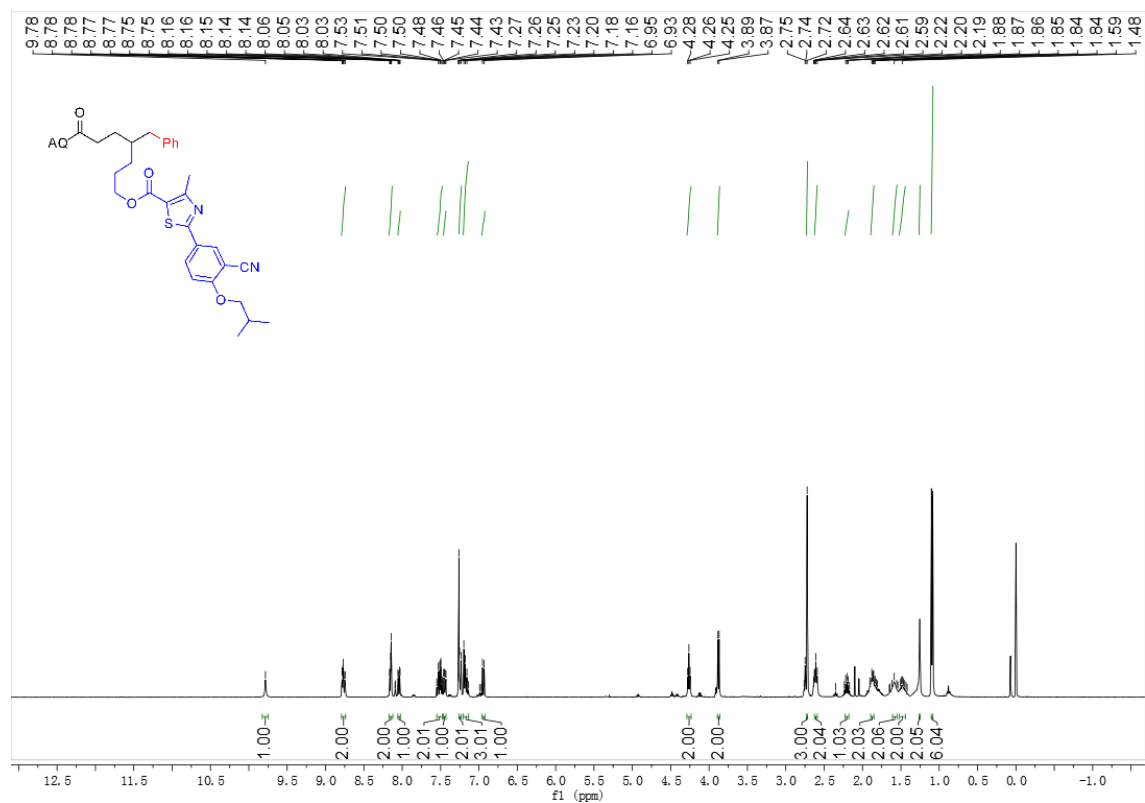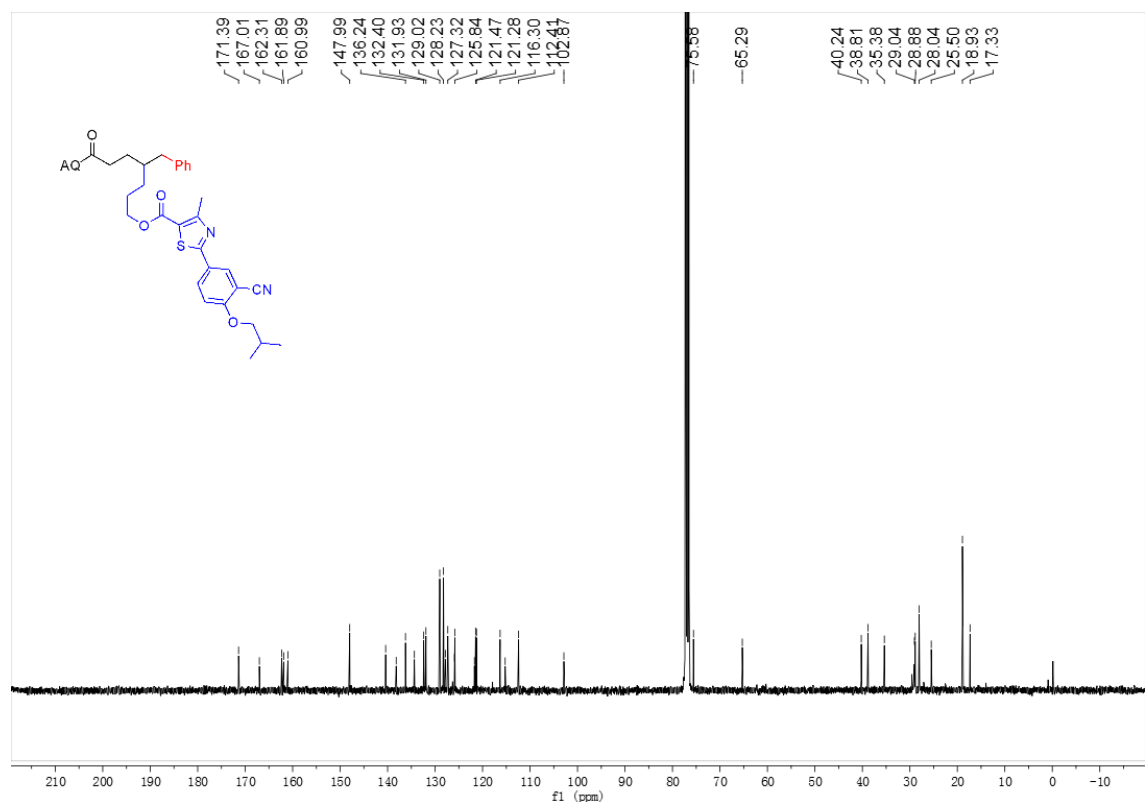

**Scheme 67.** <sup>1</sup>H NMR (400 MHz, CDCl<sub>3</sub>) and <sup>13</sup>C NMR (101 MHz, CDCl<sub>3</sub>) spectra of **4c**

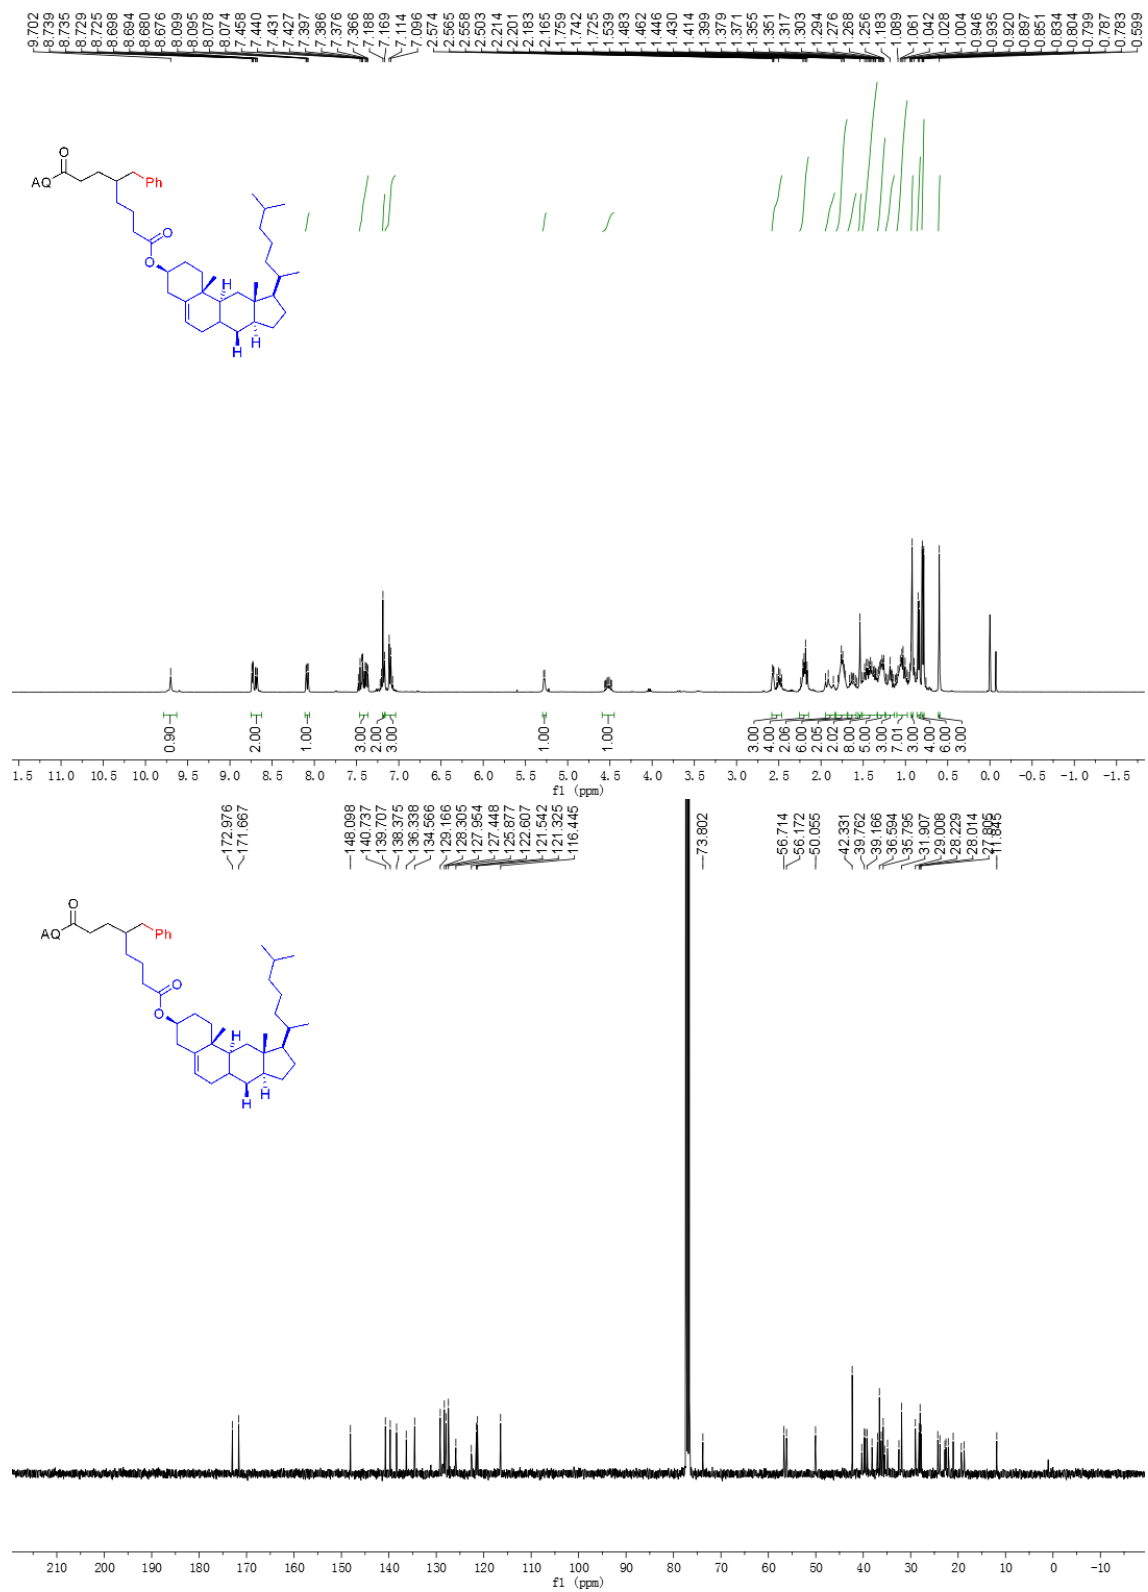

**Scheme 68.** <sup>1</sup>H NMR (400 MHz, CDCl<sub>3</sub>) and <sup>13</sup>C NMR (101 MHz, CDCl<sub>3</sub>) spectra of **4d**
